# Supplementary material for: Rewired cellular signaling coordinates sugar and hypoxic responses for anaerobic xylose fermentation in yeast
Source: PLoS Genet. 2019 Mar 11;15(3):e1008037. doi: 10.1371/journal.pgen.1008037 (PMC6428351; doi:10.1371/journal.pgen.1008037)
Supplement: S5 Table — (XLSX) [file pgen.1008037.s015.xlsx]

## Sheet: Sheet Summary
Table S5. Transcriptomic analysis for Y133, Y133 azf1∆, Y133 AZF1 MoBY 2.0 plasmid (OE), and Y133 Empty MoBY 2.0 control plasmid in xylose -O2.
Sheet Descriptions
Sheet 5-1) All Transcriptomics	All transcriptomic values for Y133, Y133 azf1∆, Y133 AZF1 MoBY 2.0 plasmid (OE), and Y133 Empty MoBY 2.0 Control plasmid strains during anaerobic growth on xylose.
Sheet 5-2) Significant Genes	Genes showing a significant (FDR < 0.05) change when AZF1 is over-expressed and a corresponding change in expression in Y128 compared to Y22-3 in xylose -O2

## Sheet: 5-1) All Transcriptomics
Table S5-1) All transcriptomic values for Y133, Y133 azf1∆, Y133 AZF1 MoBY 2.0 plasmid (OE), and Y133 Empty MoBY 2.0 control plasmid strains during anaerobic growth on xylose.
Column Descriptions:
Column 1	Systematic name for each yeast gene
Column 2	Standard name for each yeast gene, from the Saccharomyces Genome Database (http://www.yeastgenome.org)
Columns 3-10	Log2 transformed and normalized read count values for each gene in each strain during anaerobic xylose growth from RNA-seq data
Column 11	FDR value from EdgeR pairwise comparison of Y133 azf1∆ and Y133 WT during anaerobic xylose growth.
Column 12	FDR value from EdgeR pairwise comparison of Y133 AZF1 MoBY 2.0 plasmid (OE) and Y133 MoBY 2.0 Control plasmid Y128 during anaerobic xylose growth.
Columns 13-14	Log2 ratios of RNA-seq read counts comparing Y133 azf1∆ and Y133 WT in xylose -O2.
Columns 15-16	Log2 ratios of RNA-seq read counts comparing Y133 AZF1 MoBY 2.0 plasmid (OE) and Y133 MoBY 2.0 control plasmid in xylose -O2.
1	2	3	4	5	6	7	9	8	10		11	12		13	14		15	16
Systematic Name	Gene Name	WT Xylose Anaeorbic A Log2	WT Xylose Anaeorbic B Log2	azf1∆ Xylose Anaeorbic A Log2	azf1∆ Xylose Anaeorbic B Log2	MoBY Control Xylose Anaeorbic A Log2	MoBY Control Xylose Anaeorbic B Log2	MoBY AZF1 Xylose Anaeorbic A Log2	MoBY AZF1 Xylose Anaeorbic B Log2		azf1∆ / WT Xylose Anaeorbic EdgeR FDR	MoBY AZF1 / Ctrl Xylose Anaeorbic EdgeR FDR		azf1∆ / WT Xylose Anaero A RNAseq	azf1∆ / WT Xylose Anaero B RNAseq		MoBY AZF1 / MoBY Control Xylose Anaero A RNAseq	MoBY AZF1 / MoBY Control Xylose Anaero B RNAseq
YOR112W	CEX1	3.43696	3.5741	3.92979	3.91743	3.488	3.66107	6.29499	6.34997		0.0261501	3.4076e-89		0.49283	0.34333		2.80699	2.6889
YOR113W	AZF1	3.72465	3.53978	-4.32193	-3.05889	3.73227	3.84398	6.21257	6.20281		3.63379e-108	9.28741e-78		-8.04658	-6.59867		2.4803	2.35883
YPL061W	ALD6	8.4132	8.29006	8.11899	8.18349	7.55367	7.53939	5.88093	5.94298		0.0713163	9.95987e-43		-0.294212	-0.106578		-1.67274	-1.59641
YHR126C	ANS1	-0.577767	0.263034	-0.184425	0.432959	-0.136062	-1.68966	5.09043	4.93026		0.971653	2.45025e-39		0.393342	0.169925		5.22649	6.61992
YLR046C	YLR046C	4.53107	4.34767	4.66959	4.53107	6.49185	6.55213	7.91683	7.90923		0.644794	3.70168e-35		0.138524	0.183404		1.42498	1.3571
YGL255W	ZRT1	5.92196	5.60674	5.81044	5.92125	9.33324	9.3069	10.7215	10.7657		0.888184	5.2891e-35		-0.111517	0.314508		1.38826	1.45876
YDR345C	HXT3	3.96255	3.83086	4.81352	4.49697	9.05821	8.99921	10.4457	10.5635		1.88118e-06	4.12847e-34		0.850976	0.66611		1.38747	1.56428
GTK30O00120	GTK30O00120	1.35614	1.50589	1.05658	1.20789	6.15866	6.22149	7.52191	7.52458		0.585446	9.15459e-31		-0.29956	-0.297998		1.36325	1.30309
YBL075C	SSA3	2.81147	2.36457	2.3505	2.43029	6.79986	6.8475	8.10161	8.08476		0.597746	2.03341e-30		-0.460974	0.0657128		1.30174	1.23726
YBR295W	PCA1	4.17233	4.11603	4.09424	4.19928	6.23955	6.22419	7.54156	7.48993		0.91784	2.09924e-30		-0.0780914	0.0832477		1.30201	1.26573
GTK30I00230	GTK30I00230	2.02503	1.9782	2.18269	2.02857	6.54705	6.48816	7.84956	7.81051		0.936215	5.84625e-30		0.157664	0.0503735		1.30251	1.32235
YBR182C	SMP1	2.65076	2.0036	2.89142	2.25096	6.18982	6.2077	7.54365	7.50875		0.784709	5.2311e-29		0.240655	0.247359		1.35383	1.30105
YOR306C	MCH5	3.92695	3.9782	3.76553	3.98094	5.76951	5.92979	7.20604	7.22323		0.736981	5.59083e-29		-0.161414	0.00274364		1.43653	1.29344
YDR338C	YDR338C	3.98185	4.18666	4.36947	4.4019	6.24774	6.37104	7.55436	7.66384		0.19684	6.99773e-29		0.387614	0.215244		1.30662	1.29281
YJL171C	TOH1	5.79207	5.83592	5.58856	5.72982	8.30716	8.29356	9.55683	9.55061		0.283011	1.12749e-28		-0.20351	-0.106099		1.24968	1.25705
YNL006W	LST8	4.69766	4.75862	4.84449	4.5373	7.62117	7.69488	8.87529	8.97212		0.897098	1.74887e-28		0.146823	-0.221327		1.25412	1.27724
YNL142W	MEP2	3.42358	3.35614	3.6017	3.79701	5.78947	5.6744	7.12928	7.11728		0.349207	3.10095e-28		0.178118	0.440869		1.33981	1.44288
YIL099W	SGA1	0.887525	0.799087	0.613532	0.739848	4.06178	4.17792	5.67864	5.77294		0.849552	6.83723e-28		-0.273994	-0.0592392		1.61686	1.59502
YCR007C	YCR007C	3.79286	4.08236	4.26828	4.25399	7.07863	7.18557	8.46659	8.3987		0.465197	1.17292e-27		0.475429	0.171627		1.38796	1.21313
YOL016C	CMK2	5.20984	5.19061	5.0781	5.00495	7.76381	7.76977	8.9369	8.98814		0.289023	1.30255e-26		-0.131746	-0.185664		1.17309	1.21837
GTK30L00170	GTK30L00170	2.89724	2.83794	3.34199	3.10936	5.93664	6.01703	7.34767	7.34961		0.504749	2.4042e-26		0.444745	0.271417		1.41103	1.33258
YDR043C	NRG1	3.66903	3.45022	3.27202	3.17951	7.7046	7.94339	9.1441	9.0297		0.418974	7.44283e-25		-0.397004	-0.27071		1.4395	1.08631
YPL151C	PRP46	3.56925	3.34483	3.34056	3.08066	5.95257	6.1645	7.35922	7.32499		0.428155	7.62332e-25		-0.228686	-0.264171		1.40666	1.16049
YBR072W	HSP26	2.64155	2.83188	3.65535	3.55827	5.99186	5.79207	7.35913	7.4224		0.0154007	8.2415e-25		1.01381	0.72639		1.36727	1.63033
YPL149W	ATG5	3.84499	3.851	3.91073	3.99005	6.94533	6.84787	8.13268	8.17727		0.925495	1.24117e-24		0.0657445	0.139048		1.18735	1.3294
GTK30F00260	GTK30F00260	5.3067	5.3726	5.20711	5.35156	7.95489	7.81237	9.12756	9.11642		0.686876	1.59613e-24		-0.0995877	-0.0210463		1.17266	1.30405
YJR046W	TAH11	4.95606	4.7447	4.97361	5.0148	7.21169	7.41507	8.56049	8.46279		0.708211	1.67188e-24		0.0175546	0.270102		1.34879	1.04772
YPL058C	PDR12	3.39232	3.14241	3.31034	3.27202	5.39712	5.46761	6.60718	6.54504		0.985609	2.4561e-24		-0.0819773	0.12961		1.21006	1.07744
YNL125C	ESBP6	5.91145	5.76102	5.83895	5.87873	8.09656	8.12076	9.23905	9.2727		0.972673	5.16323e-24		-0.0725001	0.117706		1.14249	1.15194
YBR056W-A	YBR056W-A	4.67976	4.42089	4.64962	4.85549	9.36212	8.99064	10.6902	10.6598		0.858372	7.69823e-24		-0.0301461	0.434605		1.32806	1.66914
YIL101C	XBP1	3.29572	2.93357	3.7666	3.90207	5.33628	5.37086	6.64746	6.56209		0.000243899	7.75952e-24		0.470872	0.968501		1.31118	1.19123
YLR194C	NCW2	4.75114	4.77558	4.75114	4.85549	9.48093	9.31322	10.659	10.6276		0.988332	1.79583e-23		0	0.0799141		1.17804	1.31439
YDR258C	HSP78	4.6311	4.62877	5.11853	5.02326	7.38888	7.56323	8.61508	8.64382		0.000602972	1.91421e-23		0.487422	0.394482		1.2262	1.08059
YGR138C	TPO2	3.23573	3.32625	3.35755	3.44095	6.0365	5.9493	7.1815	7.37165		0.888184	1.91421e-23		0.121825	0.114702		1.145	1.42234
YLR414C	PUN1	5.92053	6.04745	5.98094	5.8674	8.33963	8.51108	9.53273	9.60266		0.70839	2.13259e-23		0.0604078	-0.180049		1.1931	1.09158
YOR381W	FRE3	2.48027	2.71809	2.88947	2.71809	5.4002	5.14731	6.79909	6.595		0.709113	3.46739e-23		0.409208	0		1.39889	1.44769
YGL006W	PMC1	4.51159	4.53294	4.6153	4.58556	6.71218	6.77294	7.83889	7.84775		0.909755	5.27179e-23		0.103704	0.0526232		1.12671	1.07481
YDR077W	SED1	8.10696	7.5611	8.44927	8.43313	7.58241	7.66441	8.77926	8.68559		0.00283523	5.74451e-23		0.342317	0.872029		1.19685	1.02118
YLR120C	YPS1	4.5509	4.46401	4.64328	4.83996	8.40591	8.42307	9.51521	9.55869		0.396125	6.73932e-23		0.0923783	0.375945		1.1093	1.13561
YDR222W	YDR222W	0.505891	1.83188	1.01436	0.748461	4.25248	4.32625	5.74012	5.80529		0.6529	8.36495e-23		0.508464	-1.08342		1.48764	1.47904
YIL117C	PRM5	2.55827	3.49185	3.13586	3.47897	6.0691	6.17333	7.42543	7.3353		0.865498	1.15028e-22		0.577596	-0.0128813		1.35633	1.16197
YER150W	SPI1	5.22689	5.0751	5.56468	5.46336	7.26181	7.13976	8.4731	8.52654		0.159624	1.17405e-22		0.337789	0.388256		1.21128	1.38678
YER185W	PUG1	1.89142	1.58015	1.99639	1.96347	6.06156	5.81301	7.32157	7.33718		0.839009	1.17663e-22		0.10497	0.383329		1.26001	1.52416
YAL053W	FLC2	5.4002	5.31651	5.28392	5.30961	8.04636	8.01095	9.13486	9.15474		0.632825	4.48557e-22		-0.116275	-0.00689505		1.0885	1.14379
YMR251W-A	HOR7	7.1334	6.90207	7.4266	7.79331	9.98878	10.1509	11.1882	11.1457		0.00532541	9.51824e-22		0.293201	0.891237		1.19944	0.994832
YOR273C	TPO4	5.21529	5.05007	5.27463	5.34837	6.22901	6.36335	7.37582	7.42097		0.511282	2.27673e-21		0.0593441	0.298308		1.14681	1.05762
YMR009W	ADI1	1.25096	0.669027	1.05658	1.42761	6.14792	6.55213	7.75816	7.78771		0.908138	2.76909e-21		-0.194378	0.758579		1.61024	1.23558
YOR328W	PDR10	4.03474	3.89336	4.17951	4.13175	5.37469	5.32625	6.4591	6.40378		0.421252	5.48406e-21		0.144767	0.238392		1.08441	1.07753
GTK30L00160	GTK30L00160	3.1635	3.22959	3.41007	3.32912	5.82426	5.89239	7.0343	7.04013		0.789472	5.48406e-21		0.246571	0.0995357		1.21005	1.14773
YOR220W	RCN2	4.58496	4.69488	4.62994	4.74093	6.68972	6.57077	7.8346	7.82985		0.995518	6.96016e-21		0.0449769	0.0460474		1.14488	1.25908
GTK30N03940	GTK30N03940	0.111031	0.389567	0.687061	1.28096	4.9331	5.08874	6.17473	6.17253		0.243129	1.1076e-20		0.576029	0.89139		1.24163	1.08379
YBR101C	FES1	5.26828	5.40633	5.45878	5.41244	8.17118	8.43538	9.42882	9.41117		0.894205	1.45298e-20		0.190491	0.00611025		1.25764	0.975793
YOL032W	OPI10	3.0072	3.05832	3.37851	2.61117	5.91839	6.26922	7.38137	7.51365		0.985853	2.80578e-20		0.371316	-0.447144		1.46298	1.24443
YDL010W	GRX6	3.97545	3.851	4.19535	4.0635	5.86666	5.849	7.1816	7.10066		0.687674	2.90859e-20		0.219901	0.212504		1.31494	1.25166
YER035W	EDC2	6.29737	6.48832	6.39472	6.52199	8.54249	8.48277	9.59707	9.54601		0.985853	1.45733e-19		0.0973451	0.0336708		1.05458	1.06324
YER103W	SSA4	2.37016	2.42223	2.32481	2.53107	8.32634	8.5664	9.5371	9.55869		0.985853	1.59639e-19		-0.0453537	0.108836		1.21076	0.992292
YOR385W	YOR385W	3.73118	3.68032	4.10182	3.9241	8.0864	8.51657	9.58156	9.5435		0.420915	2.87762e-19		0.370635	0.243776		1.49516	1.02693
YGR121C	MEP1	5.13996	4.96116	5.49506	5.45385	7.1822	6.97177	8.18646	8.29172		0.00391892	3.1305e-19		0.355095	0.492687		1.00427	1.31995
YKL037W	AIM26	3.02148	2.38681	2.65076	2.94486	5.49506	5.51159	7.06878	6.98391		0.985853	4.13143e-19		-0.370715	0.558047		1.57372	1.47231
YNL192W	CHS1	4.52857	4.30889	4.33485	4.3147	6.91779	6.90135	7.89954	7.95635		0.538294	5.08072e-19		-0.193717	0.00581147		0.981748	1.055
YOR032C	HMS1	0.15056	0.722466	-0.643856	-0.434403	3.89627	4.0365	5.46891	5.34127		0.237321	5.74971e-19		-0.794416	-1.15687		1.57264	1.30477
YOR375C	GDH1	8.61989	8.55697	8.88044	8.88029	8.78346	8.85325	7.81622	7.87529		0.0305005	9.42979e-19		0.260551	0.323322		-0.967241	-0.977959
YMR316W	DIA1	2.10434	2.82782	2.64155	2.9982	5.95024	6.2034	7.24174	7.27696		0.740306	9.42979e-19		0.537209	0.170376		1.29151	1.07356
GTK30J00220	GTK30J00220	1.91456	1.98914	2.31325	1.52105	4.58916	4.41886	5.79961	6.06264		0.990058	9.42979e-19		0.398681	-0.468088		1.21044	1.64378
YPR154W	PIN3	7.37608	7.38085	7.51728	7.47687	9.13286	9.1336	10.1135	10.135		0.736646	1.01958e-18		0.141194	0.0960171		0.980609	1.00144
YGR211W	ZPR1	4.87873	5.01436	4.98868	5.11395	7.60125	7.90929	8.92967	8.82251		0.877278	1.66024e-18		0.109959	0.0995952		1.32842	0.913214
YOR338W	YOR338W	2.32481	2.90497	1.68257	0.941106	5.40939	5.55735	6.6279	6.75221		0.00281823	2.01601e-18		-0.642237	-1.96386		1.21851	1.19486
YFL056C	YFL056C	7.13514	7.25908	7.59552	7.46418	10.6271	10.6245	11.6375	11.6143		0.0278784	3.85434e-18		0.460374	0.205094		1.01034	0.989792
YDR380W	ARO10	4.41007	4.51538	4.10936	3.83996	4.73769	4.61941	5.89239	5.85549		0.000581088	4.74021e-18		-0.300709	-0.675425		1.1547	1.23608
YBR169C	SSE2	4.42559	4.30597	4.74362	4.72683	6.62615	6.86481	7.83649	7.74167		0.0208793	6.16002e-18		0.318029	0.420861		1.21035	0.876864
YBR117C	TKL2	0.333424	0.555816	0.659925	0.925999	3.7126	3.52356	4.96993	4.98185		0.751919	8.85009e-18		0.326501	0.370183		1.25734	1.45829
YCR021C	HSP30	0.948601	1.10434	1.62761	1.28096	6.54009	6.89978	7.85655	7.94046		0.675916	8.8857e-18		0.679006	0.17662		1.31646	1.04068
YJR009C	TDH2	10.0876	9.92037	9.88964	9.95434	9.50597	9.46514	8.51495	8.53485		0.514785	1.0794e-17		-0.197994	0.033974		-0.99102	-0.93029
YPL250C	ATG41	6.89081	6.73944	7.14456	7.01134	10.3883	10.7078	11.6897	11.6415		0.206931	1.09355e-17		0.253745	0.271896		1.3014	0.933749
YMR085W	YMR085W	0.85599	0.111031	0.378512	0.62293	3.849	4.10852	5.10727	5.2791		0.976164	1.51398e-17		-0.477478	0.511899		1.25827	1.17058
YOL014W	YOL014W	3.44361	3.54967	3.24336	3.63691	6.84486	6.62103	8.18859	7.93091		0.928791	1.60329e-17		-0.200242	0.0872454		1.34373	1.30989
YLR375W	STP3	5.92671	5.8334	5.94579	5.849	7.30095	7.3978	8.29297	8.42916		0.971141	1.62528e-17		0.0190839	0.0156023		0.992018	1.03135
YDL012C	YDL012C	4.98778	5.30451	4.86987	4.76447	7.0398	7.1984	8.34536	8.22526		0.281848	3.16639e-17		-0.117904	-0.540037		1.30556	1.02686
YDR050C	TPI1	11.2429	11.1367	10.9529	10.9501	10.2699	10.6487	9.35401	9.33022		0.00750251	5.19589e-17		-0.290097	-0.186585		-0.915891	-1.31849
YBR071W	YBR071W	5.68313	5.71644	6.06566	5.88801	8.42488	8.37491	9.41479	9.32528		0.217901	6.87786e-17		0.382523	0.17157		0.989911	0.950374
YBR005W	RCR1	3.32625	3.74524	3.23113	3.56438	6.87061	6.97888	7.94046	8.01268		0.781216	1.30198e-16		-0.0951245	-0.180859		1.06985	1.0338
YHR183W	GND1	9.31513	9.22045	9.10753	9.12438	8.99155	9.04448	8.10926	8.11145		0.143573	1.97949e-16		-0.207596	-0.096071		-0.882294	-0.933027
YML130C	ERO1	5.35438	5.53605	5.03914	5.0387	7.399	7.56803	8.39596	8.46895		0.000436699	2.00862e-16		-0.315243	-0.497353		0.996962	0.900918
YPL240C	HSP82	5.32948	5.5008	5.67751	5.81941	8.2253	8.41354	9.29457	9.29083		0.0532746	2.36293e-16		0.348026	0.318611		1.06927	0.877282
YGR250C	RIE1	3.74201	3.87578	4.13422	4.1635	5.84071	5.88753	6.95606	6.78254		0.0944016	2.52999e-16		0.392215	0.287719		1.11534	0.895014
YLR121C	YPS3	5.49217	5.22149	5.49057	5.54504	7.10559	7.27752	8.09914	8.22545		0.651527	3.84633e-16		-0.00160353	0.323551		0.993543	0.947929
YOR152C	ATG40	3.20006	3.32912	3.58376	3.57894	5.39712	5.36702	6.6372	6.5331		0.559347	6.01082e-16		0.383695	0.249815		1.24009	1.16607
YFL016C	MDJ1	3.26454	3.27202	3.65191	3.4019	5.74201	5.87652	6.71466	6.80193		0.312934	6.14966e-16		0.387376	0.12988		0.972651	0.925418
YBR070C	ALG14	3.73335	3.68482	3.10936	2.94486	6.18031	6.3036	7.27929	7.40982		0.0212195	6.25983e-16		-0.623994	-0.73996		1.09898	1.10622
YMR305C	SCW10	7.2651	7.06296	7.33163	7.12319	8.58976	8.58489	9.51615	9.49149		0.96059	7.08482e-16		0.0665343	0.0602267		0.92639	0.906605
YOR298C-A	MBF1	7.97149	8.25257	7.92339	8.06996	9.53041	9.60396	10.4597	10.4779		0.4863	7.21019e-16		-0.0480992	-0.182611		0.929292	0.87398
YFR053C	HXK1	12.2764	12.0836	12.3265	12.433	11.1588	11.0748	10.1786	10.1118		0.328957	7.24232e-16		0.0501027	0.349451		-0.980159	-0.962943
YHR137W	ARO9	3.18269	3.23266	2.62761	2.854	3.8748	3.6792	5.38163	5.06523		0.0502133	7.85901e-16		-0.555085	-0.378665		1.50683	1.38603
YJR128W	YJR128W	0.422233	0.263034	-0.358454	0.432959	3.01078	3.06695	5.20477	5.53792		0.921629	8.36379e-16		-0.780687	0.169925		2.19399	2.47097
GTK30L00200	GTK30L00200	6.70791	6.58752	7.06781	7.05778	8.08076	7.96653	9.00262	8.95939		0.000993735	8.92234e-16		0.3599	0.47026		0.921854	0.992859
YDR151C	CTH1	4.75435	4.64904	5.01703	5.13791	5.93664	5.97522	7.05289	6.95594		0.0722053	1.26254e-15		0.262678	0.488873		1.11626	0.980723
YGL067W	NPY1	5.26566	5.44261	5.29241	5.21296	6.25456	6.38024	7.30752	7.30533		0.541769	1.26969e-15		0.0267517	-0.229653		1.05296	0.925088
YIL023C	YKE4	4.02148	3.69599	3.8885	3.70487	6.04221	6.12267	7.06523	7.22583		0.860907	1.26969e-15		-0.13298	0.00887815		1.02302	1.10316
YGR213C	RTA1	4.99503	5.20984	4.94673	4.94673	7.45236	7.37903	8.33154	8.45726		0.402055	1.58938e-15		-0.0483013	-0.263112		0.879179	1.07823
YBR076C-A	YBR076C-A	5.02503	4.35262	4.9279	5.10894	6.54581	6.42375	7.71308	7.83845		0.68079	1.6146e-15		-0.0971323	0.756325		1.16726	1.4147
YDR223W	CRF1	3.75809	3.67582	3.18269	2.81147	4.34696	4.1035	5.49121	5.52857		0.000320496	1.86081e-15		-0.575398	-0.864345		1.14425	1.42507
YGR142W	BTN2	1.81558	2.10769	2.25399	1.31615	7.61706	8.1139	9.03009	9.14677		0.912927	1.88186e-15		0.438414	-0.791542		1.41302	1.03287
YNL083W	SAL1	3.44758	3.70708	3.92029	3.76765	4.37295	4.12846	5.52544	5.48123		0.448816	2.13199e-15		0.472714	0.0605718		1.15249	1.35278
YDR492W	IZH1	4.79494	4.38059	4.53169	4.30159	6.17871	5.81506	7.29756	7.1808		0.550285	3.87114e-15		-0.263242	-0.0790033		1.11884	1.36574
YLR064W	PER33	5.32012	5.28318	5.44195	5.34731	7.45146	7.47986	8.35134	8.51045		0.888184	3.87114e-15		0.121825	0.0641303		0.899878	1.03059
YHR157W	REC104	1.69153	1.38405	2.42223	2.32481	4.0798	3.77926	5.59604	5.58616		0.263551	4.98979e-15		0.730699	0.940761		1.51624	1.8069
YMR008C	PLB1	6.46123	6.29444	6.2426	6.22323	8.15031	7.73944	9.17622	9.19424		0.265228	5.52729e-15		-0.218631	-0.0712075		1.02592	1.4548
YDL234C	GYP7	4.25626	4.25399	4.33128	4.44493	5.98709	6.06372	6.92778	6.95093		0.752055	5.73682e-15		0.0750194	0.190943		0.940685	0.887216
YJR123W	RPS5	10.2304	10.3737	10.5506	10.4202	10.0251	10.0683	9.19431	9.18269		0.428818	6.76477e-15		0.320114	0.0464879		-0.830826	-0.885643
YDR171W	HSP42	3.95884	4.16511	4.35755	3.99186	8.05891	8.42907	9.28935	9.28014		0.882562	8.11876e-15		0.398709	-0.173246		1.23044	0.851072
YKL096W	CWP1	1.42223	1.9222	1.09761	1.65076	2.7761	2.5509	4.58856	4.57894		0.747621	8.3013e-15		-0.324622	-0.271433		1.81246	2.02804
YBR103W	SIF2	2.76765	2.95791	2.97085	2.81558	3.6893	3.66221	4.89288	5.12102		0.985853	1.27125e-14		0.203199	-0.142339		1.20358	1.45881
YNR010W	CSE2	3.60407	3.43829	3.48671	3.38128	5.56621	5.44526	6.77321	6.81928		0.897562	1.27628e-14		-0.117357	-0.0570095		1.207	1.37402
YNL069C	RPL16B	8.80442	8.79594	8.8666	8.81439	8.3497	8.5686	7.57266	7.51767		0.998936	1.32995e-14		0.0621775	0.018448		-0.777039	-1.05093
YKL070W	YKL070W	3.09761	2.88947	3.05832	3.57168	5.48253	5.60348	6.92636	6.64256		0.67649	1.50191e-14		-0.0392943	0.682203		1.44383	1.03908
YPL222W	FMP40	2.40599	2.64386	2.38405	2.36737	4.65076	4.99141	5.87258	6.03012		0.657942	1.62068e-14		-0.0219426	-0.276485		1.22182	1.03871
YDR534C	FIT1	0.963474	0.411426	1.32193	1.58015	4.51286	4.54288	6.47444	5.77795		0.268443	1.64879e-14		0.358454	1.16872		1.96158	1.23507
YOL015W	IRC10	1.45418	1.28688	1.70487	1.31034	3.26903	3.6837	4.82833	4.84649		0.905336	1.9056e-14		0.250696	0.023459		1.55929	1.1628
YLR061W	RPL22A	8.87566	8.67317	8.52623	8.7912	8.13827	8.47241	7.22429	7.17113		0.544706	2.27485e-14		-0.349432	0.118028		-0.913981	-1.30128
YNR019W	ARE2	3.27501	3.2854	3.30451	3.24336	4.84046	4.80684	5.88069	5.81019		0.935872	3.03795e-14		0.029504	-0.0420378		1.04022	1.00335
YFL057C	YFL057C	4.89772	4.69766	5.05658	5.16672	7.9618	8.18701	9.04076	8.9937		0.399616	3.47898e-14		0.158859	0.469053		1.07896	0.806697
YJL116C	NCA3	5.08619	5.29315	4.65249	4.30524	5.39403	5.50335	6.51317	6.48559		4.58e-06	4.34467e-14		-0.433703	-0.987909		1.11914	0.982239
YGR210C	YGR210C	5.40803	5.49729	5.31433	5.23534	6.61618	6.73159	7.53426	7.71514		0.210863	5.34788e-14		-0.0936985	-0.261949		0.918083	0.983548
YBR004C	GPI18	4.66334	4.50526	4.84449	4.83592	6.76593	6.51396	7.77479	7.61302		0.30898	5.97303e-14		0.181141	0.330668		1.00885	1.09905
YJL144W	YJL144W	2.93923	3.45022	3.29131	3.2854	6.78188	6.3036	7.99701	7.85343		0.985853	6.44786e-14		0.352082	-0.164819		1.21513	1.54984
YLR107W	REX3	2.86592	2.8953	2.71589	2.64386	4.69488	4.72465	5.95047	5.76553		0.622702	6.67744e-14		-0.150025	-0.251446		1.25559	1.04088
YOL058W	ARG1	8.30647	8.43325	8.96009	8.83058	7.98025	7.979	7.09043	7.15593		5.61557e-06	7.12228e-14		0.653617	0.397327		-0.889824	-0.823065
YIL132C	CSM2	2.75916	2.36177	2.26303	2.65306	4.6865	4.67807	5.99005	5.96855		0.901805	7.12228e-14		-0.496121	0.291292		1.30355	1.29048
YMR189W	GCV2	5.17951	5.03826	5.42358	5.4522	5.75596	5.68454	6.64559	6.58841		0.0253683	9.32684e-14		0.244067	0.413939		0.889631	0.903877
YDL133W	SRF1	4.79129	4.88215	4.83137	4.89579	5.57531	5.52419	6.57001	6.50478		0.985609	1.03069e-13		0.0400774	0.0136334		0.994695	0.98059
YOL081W	IRA2	6.19554	5.99186	6.48977	6.53263	7.76553	7.67405	8.68292	8.60866		0.0013254	1.10074e-13		0.294223	0.540767		0.91739	0.93461
YDL229W	SSB1	9.08002	8.87909	8.97805	8.9743	8.0789	7.99915	7.21742	7.16259		0.884998	1.27212e-13		-0.101965	0.0952068		-0.861473	-0.836562
YPL001W	HAT1	3.62176	3.64386	4.01703	3.83086	5.18943	4.99548	6.20065	6.20203		0.398333	1.64741e-13		0.395272	0.187008		1.01122	1.20654
YGR077C	PEX8	3.87184	3.60407	3.849	3.78555	5.11853	5.00944	6.04549	6.09233		0.946613	1.79578e-13		-0.0228452	0.181479		0.926961	1.0829
YJL094C	KHA1	4.94017	4.70653	4.71973	4.90833	6.85037	6.67044	7.70377	7.65141		0.897562	2.2473e-13		-0.220436	0.201802		0.853391	0.980967
YBR296C	PHO89	1.89918	1.90304	2.23573	2.10769	5.17951	5.10978	6.21237	6.07468		0.67683	2.25178e-13		0.336551	0.20465		1.03286	0.964898
YDR333C	RQC1	4.29572	4.20477	4.41616	4.17073	5.29278	5.31904	6.21723	6.24031		0.985853	2.25178e-13		0.120441	-0.0340405		0.924449	0.921275
YKL060C	FBA1	11.7232	11.7427	11.6166	11.6505	10.9983	11.0124	10.1628	10.1793		0.308013	2.62447e-13		-0.106612	-0.0921611		-0.835493	-0.833081
YDR349C	YPS7	6.41126	6.27146	6.28983	6.26828	7.2829	7.13484	8.09482	8.09492		0.633842	3.48861e-13		-0.121422	-0.00317836		0.811914	0.960085
YJL190C	RPS22A	9.75941	9.83558	9.84754	9.89644	9.05075	9.18992	8.30003	8.16621		0.91784	4.22923e-13		0.0881373	0.0608616		-0.750714	-1.02371
YPR158W	CUR1	2.46205	2.40327	2.51602	2.93923	5.87922	6.35156	7.3353	7.21461		0.748517	5.09299e-13		0.0539628	0.535959		1.45609	0.863053
YDR019C	GCV1	4.38336	4.16189	4.49057	4.488	5.5552	5.58526	6.55796	6.50192		0.53294	5.99774e-13		0.107211	0.326113		1.00276	0.916654
YDL123W	SNA4	5.96371	6.09887	6.07852	6.0045	6.99107	7.09329	7.95443	8.15548		0.952061	7.76184e-13		0.114819	-0.0943729		0.963361	1.06219
YBR293W	VBA2	4.14405	4.24336	4.26903	4.3799	5.91504	5.88093	6.79857	6.78869		0.813643	8.34635e-13		0.124987	0.136534		0.883526	0.907755
YGR284C	ERV29	6.69613	6.63706	6.54551	6.66832	8.16787	7.97258	8.94609	9.02959		0.665779	9.68227e-13		-0.150628	0.0312582		0.778218	1.05701
YDR003W	RCR2	4.69711	4.51728	4.90111	5.00809	6.93758	7.19259	7.97848	8.0635		0.241868	1.07218e-12		0.204002	0.490817		1.0409	0.870914
YDR249C	YDR249C	3.99277	4.19298	4.22728	4.22728	4.86839	4.71205	5.85474	5.94883		0.847968	1.09688e-12		0.234511	0.0342958		0.986353	1.23679
YIL047C	SYG1	6.23209	6.12019	6.2447	6.29076	7.65478	7.70839	8.45372	8.58237		0.865498	1.48209e-12		0.0126117	0.17057		0.798944	0.873974
YLR355C	ILV5	10.1429	10.1012	10.2127	10.2641	9.71017	10.001	9.00284	8.94822		0.704028	1.87193e-12		0.069843	0.162929		-0.707326	-1.05274
YPL005W	AEP3	2.11437	2.24184	2.58496	2.79077	4.55459	4.97957	5.85723	5.86518		0.159624	2.0657e-12		0.470595	0.548932		1.30265	0.885608
YGL004C	RPN14	2.99277	3.13914	2.88166	3.17313	3.854	4.11437	5.20163	5.17153		0.905844	2.13606e-12		-0.111104	0.0339854		1.34764	1.05716
YMR161W	HLJ1	5.06134	5.15866	5.33914	5.36422	7.62073	7.98504	8.75335	8.76182		0.438179	2.55503e-12		0.277793	0.205562		1.13262	0.776772
YHR092C	HXT4	4.24565	4.30232	6.13976	5.90352	7.21403	7.04144	7.96976	8.07221		8.83508e-52	2.59974e-12		1.89411	1.6012		0.755733	1.03077
YBR294W	SUL1	5.0691	4.93263	5.16591	5.17353	5.27538	5.19338	4.33271	4.1102		0.525498	2.90715e-12		0.0968113	0.240899		-0.942672	-1.08318
YNL130C	CPT1	5.28799	5.14078	4.87234	4.96301	6.87431	6.98709	7.6886	7.80142		0.00960233	2.93011e-12		-0.415653	-0.177767		0.814295	0.814324
YBR189W	RPS9B	9.81126	9.96966	9.83998	9.68965	9.15563	9.60807	8.41621	8.37447		0.34296	3.31174e-12		0.028713	-0.280011		-0.739421	-1.2336
YBR021W	FUR4	3.90497	3.94392	4.09508	3.86096	5.33414	5.2709	6.17712	6.27519		0.979087	4.26896e-12		0.190115	-0.0829585		0.842981	1.00429
YER096W	SHC1	0.0703893	0.575312	1.13093	0.918386	3.70155	3.75702	4.82273	4.9991		0.391988	4.7516e-12		1.06054	0.343074		1.12118	1.24207
YNL007C	SIS1	6.56666	6.35966	6.32283	6.24298	7.9884	7.8645	8.76762	8.74729		0.175889	4.9647e-12		-0.243833	-0.116678		0.779221	0.882791
YLR048W	RPS0B	10.7058	10.7458	11.0128	10.9213	10.1211	10.186	9.42803	9.26711		0.0989064	6.266e-12		0.306994	0.175493		-0.693094	-0.918926
YLL026W	HSP104	6.04549	6.02459	6.06609	6.17991	8.63292	8.95806	9.75029	9.68816		0.88355	6.40707e-12		0.0206025	0.155323		1.11737	0.730103
YLL045C	RPL8B	9.51404	9.46326	9.5183	9.51479	8.69495	8.59582	7.86876	7.76381		0.985853	9.20084e-12		0.00425574	0.0515342		-0.826189	-0.832007
YDR418W	RPL12B	8.90983	9.17879	8.99311	8.95137	8.59096	8.73701	7.89087	7.7224		0.632825	1.05152e-11		0.0832751	-0.227417		-0.700089	-1.01461
YKL159C	RCN1	3.26604	3.02148	3.06523	2.88166	5.06695	5.50875	6.43979	6.51223		0.790702	1.0634e-11		-0.200809	-0.139815		1.37284	1.00348
YDR064W	RPS13	8.8458	9.05517	8.96795	8.87464	8.07253	8.29066	7.40625	7.24878		0.79229	1.15783e-11		0.122143	-0.180531		-0.666287	-1.04188
YBR068C	BAP2	7.89124	7.79403	7.37643	7.36413	8.70598	8.56697	9.45315	9.53465		1.42278e-07	1.22762e-11		-0.514808	-0.429891		0.747169	0.967686
YHR067W	HTD2	3.65535	4.04527	3.90304	3.66221	4.81865	4.79338	5.90977	5.8999		0.843714	1.48163e-11		0.247686	-0.383063		1.09113	1.10652
GTK30D03060	GTK30D03060	1.44361	0.863938	0.925999	0.713696	3.52732	4.10601	5.1035	5.30706		0.705192	1.48395e-11		-0.517607	-0.150243		1.57618	1.20105
YDR072C	IPT1	5.32697	5.45746	5.45549	5.31832	6.41971	6.35544	7.1916	7.24394		0.897562	1.49223e-11		0.128523	-0.139146		0.771895	0.888496
YKL051W	SFK1	0.443607	0.286881	0.400538	-0.395929	2.41414	2.61117	4.06781	4.09677		0.84119	1.59061e-11		-0.0430687	-0.68281		1.65368	1.4856
GTK30H01560	GTK30H01560	0.925999	1.32193	1.14405	1	3.05658	3.22033	4.32337	4.35262		0.921629	1.67374e-11		0.218047	-0.321928		1.26679	1.13229
YLR354C	TAL1	9.00445	9.02112	8.63001	8.66042	8.22188	8.21276	7.3856	7.46703		4.63962e-05	1.72325e-11		-0.374433	-0.360695		-0.836273	-0.745729
YLL028W	TPO1	5.11061	4.9528	4.92979	4.8674	6.43979	6.43596	7.19535	7.39258		0.393308	1.76536e-11		-0.180823	-0.0853972		0.755558	0.956613
YPL131W	RPL5	10.9207	10.8497	11.0288	11.0792	10.2376	10.0927	9.38362	9.29455		0.409246	1.82868e-11		0.108072	0.229492		-0.85401	-0.7981
YOR134W	BAG7	0.526069	-1.08927	-0.136062	0.238787	3.54473	3.29425	4.75435	4.69432		0.964219	1.95664e-11		-0.66213	1.32805		1.20962	1.40007
YKL006W	RPL14A	9.19185	9.18485	9.00501	8.99701	8.63626	8.61482	7.83977	7.71809		0.0913808	2.15176e-11		-0.186842	-0.18784		-0.796491	-0.896733
YMR266W	RSN1	6.10873	5.97797	6.11124	6.06717	6.85922	6.774	7.61206	7.58961		0.985853	2.16001e-11		0.00250649	0.0891987		0.752833	0.815617
PsXyl3	PsXyl3	8.22183	8.23797	8.08433	8.01959	9.29682	9.24367	10.0951	10.0454		0.0824844	2.40315e-11		-0.137499	-0.218384		0.798322	0.801717
YBR093C	PHO5	7.59216	7.59701	8.02558	7.97751	7.19761	7.1266	6.30378	6.3658		0.000588998	2.55113e-11		0.433425	0.380499		-0.893829	-0.760804
YBR085C-A	YBR085C-A	8.44874	8.5004	8.18809	8.11343	9.52331	9.53823	10.2711	10.3411		0.002038	3.61843e-11		-0.260642	-0.386974		0.747829	0.802868
YGL069C	YGL069C	0.464668	0.62293	0.275007	-1.51457	3.12598	3.46336	5.12184	4.92742		0.630103	4.01437e-11		-0.189661	-2.1375		1.99586	1.46406
YOR204W	DED1	6.98345	6.81186	6.74698	6.74766	8.17697	8.15871	8.90872	9.00896		0.214385	4.56785e-11		-0.236465	-0.0642004		0.731752	0.85025
YLR332W	MID2	4.74953	4.74308	4.9814	4.87283	6.47784	6.45516	7.33914	7.25333		0.578762	4.65024e-11		0.231862	0.129745		0.861298	0.798165
YOR299W	BUD7	3.59335	3.67129	3.23879	3.51979	4.92362	5.02237	5.80735	5.85922		0.210036	4.67177e-11		-0.354567	-0.1515		0.88373	0.836856
YGR254W	ENO1	11.1171	11.1244	10.9168	10.8791	10.0916	10.1996	9.34979	9.42509		0.00672103	4.71212e-11		-0.20028	-0.245263		-0.741765	-0.774496
YGL103W	RPL28	10.3749	10.3751	10.239	10.1257	9.91868	9.90661	9.1692	9.17637		0.0617357	4.71212e-11		-0.1359	-0.249374		-0.749486	-0.730232
YBL002W	HTB2	9.92229	9.8689	9.79753	9.66452	8.6264	8.52607	7.77854	7.48454		0.160046	5.29495e-11		-0.124755	-0.204381		-0.847865	-1.04153
YPR145W	ASN1	7.27771	7.21626	7.86344	7.76871	7.01981	7.02735	6.21023	6.27538		9.78475e-08	5.74401e-11		0.585737	0.552453		-0.80958	-0.751974
YDL241W	YDL241W	3.37712	3.01792	3.80116	3.65535	5.06738	5.43896	6.52105	6.49057		0.399006	6.21862e-11		0.424035	0.63743		1.45367	1.05161
YKL081W	TEF4	9.55052	9.41733	9.41964	9.51248	9.07181	9.05246	8.35913	8.26543		0.832639	6.32492e-11		-0.130872	0.0951586		-0.712676	-0.787032
YIL056W	VHR1	4.92552	4.75596	5.07296	4.9514	6.10873	5.87627	6.90869	6.85885		0.553991	6.96108e-11		0.147439	0.195446		0.799959	0.98258
YER184C	TOG1	4.65535	4.32912	4.6427	4.80581	5.67101	5.53699	6.51491	6.47994		0.517704	7.66163e-11		-0.0126503	0.476685		0.843901	0.942957
YDR055W	PST1	6.55167	6.3293	6.48768	6.53916	7.35702	7.13822	8.12578	8.07398		0.93989	9.69417e-11		-0.0639905	0.209856		0.768751	0.93576
YDR448W	ADA2	3.51979	3.29131	3.39506	3.57168	4.853	5.1534	6.03364	5.94228		0.969624	9.77769e-11		-0.124731	0.280368		1.18065	0.78888
YKL163W	PIR3	1.15704	0.400538	0.687061	1.07724	2.50589	2.24793	3.82579	3.9486		0.985853	1.06015e-10		-0.469983	0.676705		1.31989	1.70067
YMR142C	RPL13B	9.26486	9.46375	9.40703	9.37825	8.86137	9.12345	8.22275	8.15709		0.982579	1.12998e-10		0.142169	-0.0854976		-0.638619	-0.966355
YBR287W	YBR287W	5.97865	5.94205	6.09635	6.17772	8.45096	8.60407	9.23759	9.39836		0.482952	1.34895e-10		0.117693	0.235673		0.786629	0.794288
YBR051W	YBR051W	1.68257	1.70929	1.48027	0.464668	3.53232	3.68818	5.2589	6.08343		0.656292	1.61593e-10		-0.202308	-1.24462		1.72658	2.39525
YER144C	UBP5	3.72028	3.62644	3.58496	3.67469	4.72192	4.58195	5.55059	5.53045		0.807813	1.72245e-10		-0.135316	0.0482475		0.828673	0.948492
YMR251W	GTO3	0.226509	0.863938	0.722466	0.0426443	1.77821	2.08746	3.55704	3.71699		0.909245	2.10883e-10		0.495957	-0.821294		1.77883	1.62953
YCL018W	LEU2	6.58481	6.52779	6.67228	6.49985	10.2483	10.398	9.60242	9.57573		0.985853	2.10883e-10		0.0874717	-0.0279439		-0.645898	-0.822246
YNL044W	YIP3	4.87676	4.853	4.62059	4.67243	6.42694	6.3679	7.17881	7.30177		0.210006	2.38795e-10		-0.256176	-0.180572		0.751879	0.933875
YDR003W-A	YDR003W-A	3.19535	2.22342	3.8885	3.39369	4.93829	5.1014	6.78895	6.65349		0.419157	2.82251e-10		0.693152	1.17027		1.85066	1.55209
YKL152C	GPM1	11.5547	11.6425	11.4193	11.464	10.9181	10.9214	10.2078	10.1974		0.120218	2.97842e-10		-0.135396	-0.178536		-0.710367	-0.724033
YBR158W	AMN1	5.43996	5.36247	5.36422	5.32805	5.14323	5.07168	4.16672	4.09255		0.688489	3.76886e-10		-0.0757333	-0.0344233		-0.976515	-0.979131
YMR095C	SNO1	2.73985	2.854	2.12433	2.58256	4.94158	5.28059	6.25323	6.14975		0.434605	3.96585e-10		-0.61552	-0.27144		1.31166	0.869162
YLR216C	CPR6	5.87184	6.12578	6.0177	5.98094	8.01976	8.42421	9.05656	9.19311		0.897562	3.96585e-10		0.145856	-0.144836		1.0368	0.768898
YML063W	RPS1B	9.33909	9.33503	9.3836	9.53481	8.68608	8.73708	8.04761	7.9341		0.727281	5.34995e-10		0.0445035	0.199776		-0.638466	-0.802975
YDR350C	ATP22	4.40803	4.2891	4.37365	4.29205	5.75649	5.63459	6.50779	6.488		0.888184	6.15083e-10		-0.0343843	0.00294879		0.751305	0.853408
YEL063C	CAN1	6.11416	5.92006	5.86022	5.6946	7.48438	7.60318	8.23146	8.27156		0.0574734	6.34373e-10		-0.253941	-0.225453		0.747081	0.668375
YHR203C	RPS4B	7.39917	7.3302	7.15441	7.19948	6.74308	7.0607	6.07682	6.04658		0.101714	7.49436e-10		-0.244758	-0.130724		-0.666268	-1.01412
YGL123W	RPS2	9.40284	9.35023	9.53706	9.63167	9.03507	8.89745	8.27254	8.12717		0.282872	7.95458e-10		0.134222	0.281436		-0.762538	-0.770283
YKL191W	DPH2	5.16631	5.27501	5.2502	5.07639	5.51191	5.71232	6.44725	6.41735		0.727033	8.44776e-10		0.0838899	-0.198619		0.935338	0.705026
YLR185W	RPL37A	9.08215	8.90207	9.26828	9.15107	8.68373	8.86935	7.96492	7.95855		0.318306	8.59557e-10		0.186136	0.248994		-0.718813	-0.910794
YKL174C	TPO5	5.27612	5.1297	5.29682	5.36982	7.00798	6.71094	7.74598	7.71246		0.730815	8.59557e-10		0.0207001	0.24012		0.737996	1.00151
kanR	kanR	-2.32193	-1.51457	3.55582	3.0321	6.1035	6.49953	5.19298	5.33271		2.94198e-19	8.91367e-10		5.87774	4.54667		-0.910514	-1.16682
YDR313C	PIB1	4.34908	3.77294	4.27575	4.45746	5.19849	5.36317	6.21121	6.18666		0.554099	9.0675e-10		-0.0733301	0.684522		1.01271	0.823488
YLR043C	TRX1	7.08545	7.38905	7.31079	6.9005	6.98288	7.12019	6.24679	6.20887		0.583312	9.0675e-10		0.225349	-0.488546		-0.736091	-0.911318
YMR096W	SNZ1	3.61353	3.62761	3.76977	3.64155	5.39849	5.64674	6.42978	6.43796		0.952389	9.23637e-10		0.15624	0.0139392		1.0313	0.791221
YBR290W	BSD2	3.93829	4.28244	3.99639	4.25399	4.69877	4.852	5.70874	5.80142		0.957752	9.73049e-10		0.058103	-0.0284505		1.00996	0.949419
YJL005W	CYR1	4.52795	4.33557	4.40327	4.54535	5.21179	5.10476	5.88801	5.90953		0.993166	1.08737e-09		-0.124678	0.209782		0.676222	0.804777
YBR191W	RPL21A	9.24053	9.07417	9.15863	9.28198	8.42932	8.67603	7.83048	7.59328		0.963606	1.10206e-09		-0.0818941	0.207808		-0.59884	-1.08275
YML100W	TSL1	5.58466	5.56285	5.62965	5.732	5.63807	5.74551	6.40701	6.42206		0.802008	1.2847e-09		0.0449861	0.169145		0.768939	0.676559
YDR226W	ADK1	7.63655	7.82776	7.65757	7.52458	7.15634	7.1128	6.25248	6.34003		0.325478	1.37495e-09		0.0210164	-0.303175		-0.90386	-0.772776
YLR167W	RPS31	10.1801	10.2929	10.3425	10.3281	9.72487	9.8382	9.12521	9.06905		0.832639	1.38935e-09		0.162394	0.0352631		-0.599665	-0.769149
YOL040C	RPS15	10.767	10.8861	10.8487	10.6011	9.78749	10.0382	9.17832	9.1899		0.502565	1.43312e-09		0.0817325	-0.285011		-0.609178	-0.848252
YOR049C	RSB1	5.2407	5.22265	5.2589	5.04789	5.88801	5.92671	6.60822	6.6844		0.620122	1.45962e-09		0.0181998	-0.174763		0.720205	0.757687
YJL159W	HSP150	10.3891	10.0406	10.4273	10.3869	11.9698	11.9549	12.6854	12.7916		0.539709	1.65431e-09		0.0381769	0.346312		0.715612	0.836749
YGR268C	HUA1	5.30889	5.1334	5.33521	5.36317	6.8505	6.81583	7.59529	7.69829		0.83389	1.93952e-09		0.0263266	0.229772		0.744795	0.882456
YGL245W	GUS1	6.49169	6.30378	6.42341	6.54334	6.25039	6.33378	5.60259	5.61941		0.897562	1.95468e-09		-0.0682827	0.23956		-0.647806	-0.714368
GTK30I00260	GTK30I00260	4.29866	4.1334	4.50589	4.34979	7.0663	6.47719	7.89215	7.97424		0.623122	1.96626e-09		0.207233	0.216391		0.825844	1.49705
YNL178W	RPS3	9.35636	9.59503	9.19303	9.31111	8.5727	8.82219	8.00366	7.87719		0.102616	2.08256e-09		-0.163331	-0.283921		-0.569042	-0.944996
YJL089W	SIP4	1.40599	1.66448	1.49057	2.05658	4.32048	4.65134	5.44294	5.32805		0.780409	2.08256e-09		0.0845778	0.392101		1.12246	0.676708
YBL042C	FUI1	5.15502	5.12226	5.05961	5.0917	6.61545	6.69167	7.36001	7.34127		0.650231	2.14229e-09		-0.0954057	-0.0305587		0.744567	0.6496
YNL281W	HCH1	8.0601	7.98755	7.80232	7.80922	9.31508	9.31408	10.0085	9.98877		0.0440378	2.33647e-09		-0.257779	-0.178327		0.693403	0.674685
YHR068W	DYS1	7.28531	7.2829	6.97085	6.96567	6.61927	6.66647	5.92244	5.77742		0.00148247	2.42372e-09		-0.314456	-0.317234		-0.696831	-0.889053
YDR025W	RPS11A	8.64829	8.55697	8.47496	8.42152	7.78653	7.90965	7.1177	6.94158		0.195877	2.42372e-09		-0.173322	-0.135448		-0.668836	-0.968077
YDR382W	RPP2B	10.1093	10.1673	10.241	10.2071	9.92762	10.5274	9.26353	9.23874		0.878512	2.45334e-09		0.13175	0.0398444		-0.664088	-1.28866
YOR383C	FIT3	4.87971	4.49633	4.62469	5.02724	6.09656	5.80581	7.97016	7.01346		0.884998	2.61788e-09		-0.25502	0.530908		1.87361	1.20765
YOR341W	RPA190	6.37972	6.21023	6.46271	6.48414	5.91767	5.94111	5.28059	5.20906		0.459923	2.64661e-09		0.0829818	0.273905		-0.637085	-0.732043
YLR260W	LCB5	3.52857	3.33342	3.32769	3.29866	4.67582	4.86295	5.58526	5.60377		0.623436	2.73859e-09		-0.200884	-0.0347654		0.909447	0.740827
YNL092W	YNL092W	2.30743	1.9782	1.89918	2.31325	4.12763	3.75916	5.08406	5.0798		0.952626	2.73859e-09		-0.408253	0.33505		0.956431	1.32065
YJR127C	RSF2	3.98277	3.60407	3.91839	3.82375	4.20789	4.27277	5.02989	4.99413		0.955801	2.73859e-09		-0.0643792	0.219678		0.822002	0.721357
YOL011W	PLB3	3.95233	3.88557	3.84398	3.78764	5.19928	4.99413	5.92529	5.97062		0.596543	2.90932e-09		-0.10835	-0.0979329		0.726008	0.976497
YFR031C-A	RPL2A	10.4105	10.3595	10.4881	10.1807	10.2469	10.1311	9.45032	9.41673		0.783559	3.03061e-09		0.0775974	-0.17882		-0.796606	-0.714338
YBR127C	VMA2	8.64176	8.65707	8.66832	8.70224	8.29361	8.52011	7.6703	7.73735		0.985853	3.05574e-09		0.026555	0.0451737		-0.623307	-0.782759
YDR210W	YDR210W	7.08279	7.45113	6.8212	6.49249	8.62815	8.98111	9.60162	9.69605		0.000705534	3.14372e-09		-0.261588	-0.958635		0.973468	0.714935
YDR450W	RPS18A	9.42943	9.2431	9.25953	9.20499	8.39283	8.71637	7.75902	7.73444		0.44525	3.32943e-09		-0.169896	-0.0381158		-0.63381	-0.981935
YOL129W	VPS68	7.0217	6.92529	6.8846	6.68804	8.27463	8.25077	8.93272	9.05683		0.192935	3.37098e-09		-0.137104	-0.237247		0.658082	0.806055
YDR387C	CIN10	4.34127	4.28762	4.52482	4.47832	5.63372	5.65678	6.4116	6.4116		0.54473	3.46156e-09		0.183542	0.190705		0.777874	0.754813
YLR417W	VPS36	2.64386	2.73769	2.3978	2.16027	3.78764	3.90497	4.78188	4.85898		0.182594	3.49009e-09		-0.246053	-0.577412		0.994243	0.95401
YLR142W	PUT1	1.84398	1.26303	1.68706	1.80323	3.05137	3.20945	4.31252	4.26153		0.901534	4.13937e-09		-0.156923	0.540193		1.26115	1.05208
YPR174C	YPR174C	3.59455	3.66789	3.79597	3.65764	5.2604	5.2149	6.19338	6.21199		0.952055	4.48119e-09		0.201426	-0.0102521		0.932975	0.997084
YLR225C	YLR225C	4.33056	4.18349	4.4121	4.17712	4.42291	4.35403	5.33914	5.33878		0.985853	4.49741e-09		0.0815456	-0.00636601		0.916232	0.984752
GTK30I00160	GTK30I00160	11.6314	11.5033	11.7329	11.7753	11.0929	11.1027	10.4253	10.3825		0.305876	4.57172e-09		0.101475	0.272023		-0.667619	-0.720197
YFL021W	GAT1	5.36667	5.03914	5.78267	5.65335	6.42291	6.28891	7.10434	7.12174		0.000809543	4.67449e-09		0.415999	0.614208		0.681431	0.832829
YDL130W	RPP1B	10.6267	10.4938	10.5698	10.5939	10.1724	10.5026	9.64386	9.4684		0.966539	4.91506e-09		-0.0569321	0.100149		-0.528546	-1.03419
YOR369C	RPS12	10.3972	10.3871	10.112	10.0505	9.68278	10.0028	9.1417	9.03483		0.000588998	4.98234e-09		-0.285102	-0.336619		-0.541086	-0.96796
YBR008C	FLR1	3.51602	3.50208	3.39917	3.5097	4.83895	4.81762	5.63081	5.70432		0.81673	5.48164e-09		-0.116844	0.00761989		0.791861	0.886695
YEL046C	GLY1	8.19426	8.18725	8.27603	8.28827	9.0247	9.15104	9.73427	9.84353		0.850252	5.74089e-09		0.0817669	0.101013		0.709573	0.692487
GTK30K00160	GTK30K00160	6.06953	6.02591	5.96555	5.5549	7.54859	6.96151	8.35478	8.38935		0.108922	6.05024e-09		-0.103977	-0.471019		0.806188	1.42784
YBR121C	GRS1	7.67207	7.69829	7.76593	7.65814	7.25946	7.30405	6.62673	6.61206		0.985853	6.34333e-09		0.0938608	-0.0401479		-0.63273	-0.691997
YGL147C	RPL9A	6.82248	6.86555	6.87652	6.95152	6.18527	6.23649	5.30889	5.14812		0.949851	6.52149e-09		0.0540417	0.0859702		-0.876387	-1.08837
YLR214W	FRE1	4.10266	3.98277	4.5097	4.33342	5.01659	5.14323	5.85947	5.83769		0.0333127	6.89298e-09		0.407038	0.350658		0.842887	0.694461
YDR246W-A	YDR246W-A	2	2.09761	0.475085	2.0072	3.77716	3.58496	5.46956	5.56071		0.68444	7.36684e-09		-1.52492	-0.0904153		1.6924	1.97575
YPR152C	URN1	1.28688	1.42761	1.59932	1.75702	3.51223	4.03826	4.99005	4.85848		0.734339	7.68349e-09		0.312437	0.329417		1.47782	0.820218
YMR122W-A	YMR122W-A	8.77926	8.83964	9.0219	8.86403	9.75293	9.45775	10.3844	10.5055		0.675916	7.80684e-09		0.242636	0.0243866		0.63143	1.04771
YNL249C	MPA43	2.70487	2.60407	2.81762	2.47508	3.83289	3.8885	4.80374	4.83441		0.985853	7.91477e-09		0.112751	-0.128986		0.970854	0.945908
YHR193C	EGD2	8.596	8.45984	8.73914	8.62928	7.70065	8.0013	7.10056	6.94778		0.574028	8.81223e-09		0.143136	0.169442		-0.600091	-1.05351
YER117W	RPL23B	8.35315	8.54172	8.58553	8.51519	8.25498	8.4088	7.44004	7.64983		0.850076	1.09966e-08		0.232379	-0.0265288		-0.814943	-0.758966
GTK30H02750	GTK30H02750	1.55582	1.56071	1.76977	1.0635	0.910733	1.12433	2.81147	2.80323		0.921629	1.13773e-08		0.213956	-0.497212		1.90074	1.6789
YNL042W	BOP3	2.92029	2.37295	2.40327	2.51096	3.50208	3.99548	4.85599	4.91217		0.710275	1.25152e-08		-0.517026	0.13801		1.35391	0.916686
YGR146C-A	YGR146C-A	1.98914	2.63227	1.79077	2.80529	5.01033	4.5404	6.26604	6.55934		0.985853	1.30269e-08		-0.198367	0.173024		1.2557	2.01894
YKL180W	RPL17A	9.38174	9.1289	9.39951	9.56584	8.80455	8.59597	8.00248	7.8568		0.372473	1.33326e-08		0.0177753	0.436948		-0.802073	-0.739167
YDR129C	SAC6	5.79546	5.71039	5.79675	5.72874	6.3107	6.32427	6.99118	6.96498		0.934753	1.36043e-08		0.0012982	0.0183437		0.680478	0.640706
YHR030C	SLT2	4.77241	4.68201	4.8125	4.42358	5.85225	6.11353	6.7662	6.73971		0.692468	1.37031e-08		0.0400847	-0.258433		0.913949	0.626179
YJR117W	STE24	5.87627	5.61147	5.83794	5.85898	7.51531	7.43704	8.16305	8.14537		0.853581	1.43553e-08		-0.0383281	0.247508		0.64774	0.708327
YLR197W	NOP56	6.75849	6.68874	6.893	6.82018	6.38163	6.78136	5.80193	5.6499		0.665779	1.65857e-08		0.134508	0.131439		-0.579695	-1.13146
YOL086C	ADH1	14.0285	13.7868	13.6112	13.6968	13.2024	13.8973	12.4892	12.4875		0.0145061	1.72232e-08		-0.417283	-0.0899677		-0.713143	-1.40984
YOR153W	PDR5	9.08921	8.9321	8.7807	8.72376	9.56404	9.53199	10.2379	10.2768		0.00532541	1.73337e-08		-0.308508	-0.208333		0.673892	0.744813
YJL177W	RPL17B	8.96	8.82931	8.7387	8.83513	8.18676	8.2738	7.56932	7.48905		0.438178	1.76531e-08		-0.221302	0.00582409		-0.617434	-0.78475
YDR518W	EUG1	6.94685	6.66661	6.75034	6.7807	7.54936	7.48422	6.79805	6.87344		0.765328	1.83083e-08		-0.196509	0.114089		-0.751311	-0.610775
YBR250W	SPO23	0.0285692	0.545968	0.757023	0.887525	2.75275	3.41278	4.32048	4.36177		0.616197	1.88822e-08		0.728454	0.341557		1.56774	0.948987
YPL223C	GRE1	1.34483	1.63691	0.464668	1.15704	2.8953	3.25096	4.50271	4.89821		0.542039	1.90808e-08		-0.88016	-0.479871		1.60741	1.64725
YAL007C	ERP2	6.54535	6.55995	6.64861	6.26847	6.45878	6.85087	5.74066	5.69683		0.69335	2.03747e-08		0.103259	-0.291479		-0.718118	-1.15405
YBR048W	RPS11B	8.81817	8.93578	8.94161	8.76756	7.94427	8.08603	7.29287	7.26275		0.8374	2.06932e-08		0.123438	-0.168228		-0.651399	-0.823277
YNL302C	RPS19B	7.76461	7.87842	7.83668	7.52701	6.90785	7.27324	6.29939	6.15927		0.428818	2.10457e-08		0.0720754	-0.351411		-0.608461	-1.11397
YOR167C	RPS28A	8.81558	8.91895	8.78454	8.89078	8.47654	8.5865	7.66669	7.78097		0.790944	2.1686e-08		-0.0310387	-0.0281716		-0.809858	-0.805536
GTK30O00150	GTK30O00150	6.20867	5.67271	5.51159	5.61794	8.72024	8.30624	9.40994	9.49095		0.0353165	2.25077e-08		-0.697079	-0.0547633		0.689698	1.18471
YEL060C	PRB1	8.26224	8.16586	8.31723	8.38905	9.38772	9.38903	10.0562	10.0515		0.620882	2.25077e-08		0.0549959	0.223189		0.668529	0.66252
YBR099C	YBR099C	1.5509	1.38957	1.3505	1.75275	3.84298	3.69599	5.24603	5.15381		0.985853	2.59241e-08		-0.200403	0.363182		1.40305	1.45781
YOR063W	RPL3	10.1912	10.1034	10.1598	10.2369	9.56953	9.80805	9.01416	9.01706		0.985853	2.59241e-08		-0.0313738	0.133496		-0.555373	-0.790988
GTK30L03690	GTK30L03690	4.81762	4.59216	5.06134	5.15866	5.01033	4.90352	4.10014	4.26454		0.00644008	2.59708e-08		0.243721	0.566502		-0.910196	-0.638984
YOL060C	MAM3	6.01145	5.67864	5.95489	5.89166	6.92339	7.01335	7.61279	7.61021		0.947421	2.61079e-08		-0.0565567	0.213027		0.689408	0.596862
GTK30D02750	GTK30D02750	6.72301	6.8198	6.85574	6.77637	7.18923	7.46858	8.03689	8.07874		0.98671	2.62726e-08		0.132728	-0.0434287		0.847656	0.610155
YER003C	PMI40	5.36982	5.37608	5.04701	5.1914	4.66959	4.51538	3.77716	3.61235		0.0303745	2.6402e-08		-0.322801	-0.184677		-0.892437	-0.903032
YLR029C	RPL15A	10.0993	10.1586	10.2184	10.2963	9.40267	9.63702	8.89166	8.81468		0.671487	2.79779e-08		0.119123	0.137708		-0.511009	-0.822345
YOR355W	GDS1	6.63387	6.54381	6.904	6.89736	6.35738	6.32319	5.6453	5.58406		0.033013	2.97317e-08		0.270135	0.353556		-0.712078	-0.739129
YMR242C	RPL20A	7.59552	7.70874	7.77149	7.75896	7.07607	7.00899	6.21723	6.36947		0.784737	3.01116e-08		0.175971	0.050217		-0.858837	-0.639522
YGR180C	RNR4	8.94498	9.12779	9.28462	9.52237	8.78319	8.94872	8.17518	8.26388		0.0370646	3.07476e-08		0.33964	0.394578		-0.608019	-0.684838
YNL020C	ARK1	3.60644	3.83794	3.93357	4.19377	5.42526	5.45878	6.25626	6.10936		0.233298	3.07476e-08		0.32713	0.355829		0.830998	0.650585
YKR046C	PET10	2.50335	3.43029	3.09592	3.06178	3.08916	3.28392	4.77452	4.32265		0.985853	3.48733e-08		0.592576	-0.368509		1.68536	1.03873
YOR096W	RPS7A	7.98043	7.87461	7.91361	7.97854	7.40378	7.42291	6.70418	6.63445		0.962819	3.94525e-08		-0.0668177	0.103926		-0.699599	-0.788458
YPR159W	KRE6	7.59947	7.45319	7.5421	7.54102	8.37586	8.20657	9.03672	8.97751		0.946222	3.9885e-08		-0.0573633	0.0878308		0.660858	0.770934
YPR175W	DPB2	1.91073	1.70044	2.06695	2.01792	2.88947	3.0197	3.86394	3.74953		0.564205	4.18191e-08		0.156218	0.317482		0.974465	0.729832
YDL055C	PSA1	8.75118	8.71239	8.41371	8.52927	8.289	8.24384	7.63045	7.62921		0.0136728	4.22467e-08		-0.337463	-0.183115		-0.658555	-0.61463
YMR238W	DFG5	5.0781	5.04177	4.98868	4.64443	6.05897	5.72819	6.77755	6.72533		0.183483	4.22467e-08		-0.0894127	-0.397335		0.718585	0.99714
YGL045W	RIM8	3.63807	3.72465	3.71809	3.72247	5.27202	5.52388	6.19673	6.13319		0.985853	4.22467e-08		0.0800137	-0.00218425		0.924702	0.609318
YER039C	HVG1	1.41684	1.92979	1.8953	0.910733	3.0321	3.04439	4.37016	4.63227		0.880071	4.52488e-08		0.478463	-1.01906		1.33806	1.58787
YKR061W	KTR2	2.68257	2.57289	2.71809	1.87578	3.8268	4.0045	5.03606	4.79753		0.659799	4.60086e-08		0.0355143	-0.69711		1.20926	0.79303
YOR360C	PDE2	5.53699	5.30012	5.2114	5.20594	6.00068	5.87209	6.6476	6.68706		0.137696	4.72269e-08		-0.325584	-0.0941839		0.646926	0.814971
YNL016W	PUB1	7.34749	7.28688	7.38793	7.40608	6.93746	7.24184	6.39934	6.31868		0.89975	5.32935e-08		0.0404427	0.119196		-0.53812	-0.923162
YER124C	DSE1	4.40735	4.35191	4.22651	4.30816	4.337	4.77189	3.50843	3.5097		0.535674	5.44941e-08		-0.180844	-0.043754		-0.828569	-1.26219
YLR340W	RPP0	10.4749	10.3852	10.5261	10.5989	9.50621	10.0463	8.95096	8.90343		0.629789	5.82107e-08		0.0512244	0.213763		-0.555244	-1.1429
YPL045W	VPS16	2.9982	3.1375	3.04264	3.48543	3.93074	4.1127	4.90977	4.78503		0.70839	5.82107e-08		0.0444488	0.347923		0.979036	0.672327
YIL148W	RPL40A	8.64137	8.64972	8.68029	8.89539	7.82725	8.01324	7.14802	7.18844		0.67649	5.87066e-08		0.0389238	0.24567		-0.679229	-0.824798
YDR040C	ENA1	7.68566	7.46467	7.7037	7.75181	9.11681	9.04895	9.78067	9.7322		0.617865	6.21833e-08		0.0180361	0.287144		0.663859	0.683251
YLR150W	STM1	8.92843	8.96139	8.93136	8.90704	8.04516	8.55144	7.54179	7.28836		0.779466	6.30732e-08		0.00292849	-0.0543509		-0.503365	-1.26308
YHL033C	RPL8A	8.40986	8.43095	8.37282	8.48006	7.78077	7.84931	7.17483	7.1267		0.921629	6.54453e-08		-0.0370361	0.0491088		-0.605944	-0.722607
YOR035C	SHE4	4.3147	4.37226	4.39575	4.43896	5.6279	5.67158	6.36685	6.28225		0.943305	7.07567e-08		0.0810518	0.0667025		0.738948	0.610678
YMR143W	RPS16A	9.20513	9.32683	9.12719	8.85801	8.5313	8.75198	8.01887	7.77406		0.0434638	7.41382e-08		-0.0779387	-0.468822		-0.512436	-0.977917
YBL092W	RPL32	9.1469	9.07516	9.33633	9.39874	8.4121	8.59403	7.824	7.78234		0.134743	8.41431e-08		0.189428	0.323585		-0.5881	-0.811683
YMR185W	RTP1	2.87184	2.64155	2.80529	3.16993	4.0781	4.33056	4.96947	4.99458		0.598285	8.43685e-08		-0.0665512	0.528379		0.891375	0.664021
YPL265W	DIP5	7.23515	7.0705	7.66654	7.64364	7.17233	7.04155	6.46385	6.40837		2.33251e-05	8.5266e-08		0.431391	0.573143		-0.708476	-0.633177
YJL059W	YHC3	2.82375	3.11437	2.75275	2.85798	4.10936	3.82069	4.91121	5.05702		0.666225	9.06464e-08		-0.0710008	-0.256386		0.801852	1.23633
YPL160W	CDC60	6.30524	6.25607	6.36036	6.50271	6.18686	6.22997	5.58916	5.56864		0.60673	9.16902e-08		0.0551233	0.246645		-0.597693	-0.661332
YOR343C	YOR343C	2.7845	2.71809	3.0993	3.23113	3.99729	4.20555	5.50938	5.40224		0.690226	9.1805e-08		0.314791	0.513038		1.51209	1.1967
YLL018C	DPS1	6.77768	6.9578	6.91433	6.89093	6.45845	6.48896	5.79494	5.8125		0.985853	1.09427e-07		0.136643	-0.0668655		-0.663512	-0.676467
YJR146W	YJR146W	1.66903	2.69822	0.9855	2.32769	4.51979	4.38336	5.65277	5.66903		0.634878	1.14283e-07		-0.683526	-0.370531		1.13298	1.28567
YPL063W	TIM50	5.20984	5.04439	5.18706	5.07296	4.81147	5.06652	4.04614	4.0063		0.936215	1.19874e-07		-0.0227881	0.0285692		-0.765329	-1.06022
YML072C	TCB3	6.23016	6.04111	6.05181	6.12329	6.26491	6.26303	5.68342	5.63372		0.721683	1.2928e-07		-0.178357	0.0821822		-0.581496	-0.629313
YDR454C	GUK1	6.85287	6.9384	6.72574	6.66477	6.06307	5.96116	4.95466	5.14405		0.118044	1.38935e-07		-0.127132	-0.273636		-1.10841	-0.817114
YCR031C	RPS14A	9.94141	9.93418	10.0648	10.0177	9.76142	10.0053	9.27526	9.22516		0.776965	1.71325e-07		0.123369	0.0835358		-0.486155	-0.780185
YDR476C	YDR476C	6.43979	6.40667	6.32048	6.2867	7.27342	7.11395	7.9191	7.89342		0.420842	1.7162e-07		-0.119305	-0.119976		0.645679	0.779472
YJR010W	MET3	7.37234	7.46809	7.27947	7.25767	7.23016	7.01903	6.42307	6.42727		0.20655	1.72098e-07		-0.0928714	-0.210424		-0.807091	-0.591764
YNL012W	SPO1	2.42492	2.32193	2.15704	2.22033	3.40735	3.25248	4.28466	4.23266		0.62023	1.73635e-07		-0.267878	-0.101598		0.877309	0.980185
YPL239W	YAR1	4.69432	4.6017	4.80116	4.45812	6.31922	6.93428	7.53566	7.68573		0.962819	1.80425e-07		0.106836	-0.143577		1.21644	0.751449
YHL015W	RPS20	8.7706	9.30761	9.3031	9.09255	8.20374	8.56323	7.63074	7.61125		0.8374	1.87207e-07		0.532498	-0.215065		-0.572999	-0.951988
YIR039C	YPS6	3.01436	2.90111	3.14731	2.94673	3.27947	3.34767	4.41752	4.19613		0.928791	1.94154e-07		0.132951	0.0456226		1.13804	0.848469
YPL270W	MDL2	4.12019	3.904	4.11853	4.00988	5.22959	5.18587	5.83162	5.86146		0.985853	1.94154e-07		-0.00166018	0.105882		0.602036	0.675593
YNL327W	EGT2	7.04767	6.73457	7.07703	7.09814	7.21111	7.17562	6.55842	6.62673		0.511937	2.08568e-07		0.0293601	0.363563		-0.652689	-0.548893
YDL081C	RPP1A	10.4713	10.5378	10.5993	10.6885	10.2158	10.644	9.73379	9.65926		0.633444	2.11091e-07		0.128007	0.150702		-0.482005	-0.984736
YMR290C	HAS1	5.61147	5.73417	5.7866	5.58586	4.92077	4.97223	4.03826	4.15381		0.96199	2.25258e-07		0.175129	-0.148304		-0.882509	-0.818428
YPR196W	YPR196W	3.35755	3.30012	3.18903	3.39643	3.70487	3.8166	4.67525	4.67864		0.890872	2.27163e-07		-0.168518	0.0963098		0.970379	0.862036
YKL046C	DCW1	5.43962	5.58646	5.27501	4.93782	5.55305	5.28059	6.20711	6.23879		0.00532541	2.43837e-07		-0.164616	-0.648649		0.654059	0.958202
YIL018W	RPL2B	9.62247	9.52133	9.26632	9.16101	8.9733	8.904	8.33914	8.33114		0.000138022	2.4983e-07		-0.356155	-0.36032		-0.634158	-0.572861
YGL031C	RPL24A	9.24819	9.52235	9.28323	8.88953	8.35156	8.86904	7.79071	7.79876		0.105262	2.55736e-07		0.0350388	-0.632812		-0.560851	-1.07028
YOR326W	MYO2	5.97865	5.84248	5.74631	5.87209	6.10664	6.13771	5.53823	5.52607		0.48476	2.55736e-07		-0.23234	0.0296139		-0.568414	-0.61164
YMR211W	DML1	2.60644	2.51854	2.62761	2.73985	3.79805	3.71149	4.63401	4.73823		0.916765	2.75212e-07		0.0211646	0.221313		0.835962	1.02673
YLR381W	CTF3	3.04614	3.1375	3.24489	3.26604	3.51854	3.32193	4.38957	4.28021		0.748517	2.75324e-07		0.198745	0.128533		0.871032	0.958286
YNL093W	YPT53	0.956057	0.111031	-0.234465	0.963474	3.82985	3.9514	5.06437	4.91073		0.947372	2.8591e-07		-1.19052	0.852443		1.23452	0.959331
YPL147W	PXA1	2.73335	2.06005	2.88753	2.78031	2.22033	2.32769	3.32769	3.26303		0.289999	3.05392e-07		0.154171	0.720263		1.10736	0.935347
YGL072C	YGL072C	3.00899	3.19692	2.33914	2.54597	4.59515	4.89433	5.75409	6.15927		0.299684	3.05392e-07		-0.669851	-0.650953		1.15894	1.26493
YGL200C	EMP24	7.51625	7.63394	7.55612	7.24935	7.23122	7.58834	6.68538	6.59544		0.289508	3.1445e-07		0.0398712	-0.384589		-0.545842	-0.992896
YLR441C	RPS1A	8.89354	8.85334	8.89927	8.91232	7.80109	8.24593	7.33727	7.12588		0.985853	3.46497e-07		0.00572204	0.0589798		-0.463829	-1.12005
GTK30N00610	GTK30N00610	2.39506	2.35332	2.50843	2.7137	2.87971	2.95047	1.8679	2.04963		0.51729	3.68764e-07		0.113366	0.360373		-1.01181	-0.900838
YDR451C	YHP1	5.7126	5.49185	5.54967	5.7021	4.69766	4.8846	3.81044	3.84699		0.984623	4.34213e-07		-0.162927	0.21025		-0.88722	-1.0376
YDL082W	RPL13A	7.95204	7.96694	7.83397	7.90563	7.09107	7.5274	6.49825	6.50557		0.492694	4.65414e-07		-0.118077	-0.0613103		-0.592814	-1.02183
YNL135C	FPR1	9.51124	9.57856	9.51227	9.43185	9.04445	9.0834	8.46516	8.42823		0.567696	4.67193e-07		0.00102767	-0.146709		-0.579291	-0.655165
YGR027C	RPS25A	10.8855	10.8098	10.7977	10.485	9.83975	9.98671	9.34682	9.30143		0.157152	4.87384e-07		-0.0878585	-0.324867		-0.492931	-0.685282
YBR036C	CSG2	6.96809	6.77676	6.94205	6.79675	8.17911	7.91331	8.75546	8.73948		0.905336	5.19376e-07		-0.0260455	0.0199915		0.576342	0.826169
YHR142W	CHS7	5.10266	5.22612	5.3194	5.1918	5.95582	5.80271	6.55167	6.73971		0.903703	5.29555e-07		0.216743	-0.0343236		0.595846	0.937003
YGR085C	RPL11B	6.69961	6.76553	6.69056	6.83971	6.19397	6.20594	5.39025	5.29315		0.985853	5.62056e-07		-0.00905038	0.074173		-0.803714	-0.91279
YDR508C	GNP1	7.90935	7.8916	7.98954	7.96174	7.75168	7.61309	7.04974	7.08948		0.905336	5.82895e-07		0.0801833	0.0701376		-0.701938	-0.523613
YBL087C	RPL23A	9.1404	9.36781	9.13983	8.95992	8.70888	9.02843	8.12257	8.21946		0.15535	6.09189e-07		-0.000562534	-0.407893		-0.586308	-0.808972
YMR315W-A	YMR315W-A	4.16108	3.58015	4.18269	3.904	7.06921	7.48172	8.2353	8.28174		0.944831	6.41798e-07		0.0216108	0.323857		1.16609	0.800026
YLR138W	NHA1	4.99729	4.92695	5.03254	4.91504	6.75902	6.83668	7.36571	7.38241		0.949851	6.43513e-07		0.0352493	-0.0119055		0.606687	0.545726
YFR022W	ROG3	2.39506	2.40054	2.21723	2.0635	2.62994	2.60881	3.64386	3.57289		0.435933	6.45784e-07		-0.177832	-0.337035		1.01392	0.96408
YLR044C	PDC1	11.2802	11.1028	11.1384	11.2184	9.60218	9.5907	9.00155	9.02998		0.8374	6.64079e-07		-0.141767	0.115686		-0.60063	-0.560722
YGR057C	LST7	3.23879	3.44095	3.0036	3.17632	4.09592	4.03122	4.90256	4.91409		0.354065	6.89835e-07		-0.235185	-0.264629		0.806632	0.882867
YBL049W	MOH1	5.99299	5.92053	5.99639	6.32643	6.52074	6.41532	7.20506	7.29066		0.60818	7.11166e-07		0.00339378	0.405898		0.684324	0.875345
YOR293W	RPS10A	7.65349	7.5043	7.61434	7.64306	6.92279	7.19476	6.36632	6.26847		0.985853	7.608e-07		-0.0391482	0.13876		-0.55647	-0.926285
YHR156C	LIN1	1.41684	2.02503	1.37851	0.799087	4.7666	5.48575	6.11541	6.26134		0.354065	7.76848e-07		-0.0383281	-1.22594		1.34881	0.775594
YGR234W	YHB1	7.98829	8.0124	8.60737	8.4884	8.08911	8.16068	7.61611	7.40761		2.53521e-07	7.85336e-07		0.61908	0.476001		-0.472998	-0.753071
YKL179C	COY1	4.45549	4.17073	4.37434	4.08406	4.70929	4.78136	5.49953	5.39575		0.744082	7.85336e-07		-0.0811476	-0.086662		0.790236	0.614389
YGR086C	PIL1	8.33981	8.18616	8.26289	8.15699	8.16179	8.49841	7.70009	7.66356		0.683959	7.86489e-07		-0.076912	-0.0291706		-0.461694	-0.834852
YDL072C	YET3	6.47411	6.63909	6.79207	6.73755	7.64911	7.66221	8.28017	8.27034		0.421252	8.2785e-07		0.317963	0.0984641		0.631055	0.608137
YOL121C	RPS19A	7.14527	7.26519	6.81737	6.84549	6.26021	6.66619	5.55305	5.68454		0.000320424	8.32358e-07		-0.327902	-0.419703		-0.707161	-0.98165
YIL057C	RGI2	8.46021	8.91513	8.83029	8.86326	7.43112	7.64061	6.68706	6.90941		0.793478	8.57261e-07		0.370083	-0.0518754		-0.744061	-0.731193
YNR050C	LYS9	6.25663	6.36842	6.83681	6.88289	6.50208	6.64832	5.96116	5.89724		4.17373e-06	8.91108e-07		0.580175	0.514468		-0.540916	-0.751081
YBL048W	RRT1	5.27426	5.10852	5.58646	5.46074	6.51696	6.16068	7.22362	7.31061		0.356717	9.63017e-07		0.312203	0.352218		0.706655	1.14993
YNL263C	YIF1	6.30761	6.34696	6.29627	6.07831	6.7286	6.62848	7.36186	7.31234		0.355885	1.03917e-06		-0.0113368	-0.268646		0.633255	0.683856
YGL178W	MPT5	4.18982	3.8125	4.30305	4.25248	5.57924	5.4219	6.20614	6.07788		0.26922	1.04163e-06		0.113226	0.439978		0.626895	0.655987
YGR189C	CRH1	6.75154	6.64688	6.92683	6.78633	8.28137	8.46683	8.96235	8.97249		0.562034	1.06527e-06		0.175286	0.139452		0.680973	0.505661
YGR192C	TDH3	12.0745	11.9805	11.8236	11.7776	11.6994	12.0296	11.1488	11.2345		0.00637429	1.09641e-06		-0.250859	-0.202883		-0.550597	-0.795045
YER081W	SER3	6.81173	6.85337	6.70791	6.72397	6.99605	6.6532	6.06738	6.08937		0.352539	1.10633e-06		-0.103817	-0.129404		-0.928669	-0.563832
YGR214W	RPS0A	10.2255	10.1615	10.4018	10.2694	9.96851	9.82279	9.3267	9.25415		0.577754	1.11822e-06		0.176326	0.107884		-0.641809	-0.568639
YLR303W	MET17	9.98439	9.95755	10.0071	10.0318	9.73337	9.51193	8.9978	8.9589		0.985853	1.11822e-06		0.0226794	0.0742596		-0.735571	-0.55303
YGR034W	RPL26B	9.36866	9.27188	9.37689	9.40017	8.80964	8.66842	8.16777	7.91922		0.939065	1.15405e-06		0.00822584	0.128292		-0.64187	-0.749203
YOR182C	RPS30B	9.45822	9.59833	9.69912	9.40465	9.02367	9.31338	8.46152	8.48913		0.985853	1.17817e-06		0.240899	-0.19368		-0.562151	-0.824256
YJR106W	ECM27	4.61235	4.42492	4.64904	4.67864	6.54581	6.0119	7.17293	7.19101		0.69335	1.21233e-06		0.0366881	0.253713		0.627114	1.17911
YDR034W-B	YDR034W-B	3.36737	3.7866	3.43029	3.05137	5.91719	5.75862	6.9241	6.92647		0.757437	1.23221e-06		0.0629142	-0.735224		1.00691	1.16785
YPR036W-A	SPO24	9.99475	10.0578	10.6523	10.7412	11.1517	11.2165	11.7186	11.8075		9.54097e-10	1.24761e-06		0.657504	0.683397		0.566866	0.590996
YPL222C-A	YPL222C-A	2.70929	2.02857	2.51096	1.71809	4.48543	5.02192	5.99661	6.00135		0.897562	1.26274e-06		-0.198329	-0.310482		1.51119	0.979428
YGR094W	VAS1	6.98959	6.89336	6.92813	6.85512	6.44907	6.38249	5.85748	5.80323		0.666225	1.39381e-06		-0.0614598	-0.0382446		-0.591583	-0.579267
YIL020C	HIS6	2.9222	2.79494	2.93923	1.80735	2.848	2.20163	3.96901	3.95884		0.616197	1.40079e-06		0.0170287	-0.987581		1.12102	1.75721
YIL133C	RPL16A	7.26594	7.39823	7.48896	7.38836	6.73836	7.17063	6.10518	6.28688		0.82161	1.43533e-06		0.223022	-0.00986887		-0.633187	-0.883745
YPR125W	YLH47	3.61589	3.3799	3.38819	3.62293	4.41684	4.86641	5.6761	5.39849		0.970702	1.46003e-06		-0.227698	0.243032		1.25926	0.532074
YLL050C	COF1	6.41295	6.23228	6.28928	6.43112	6.0376	6.00675	5.28207	5.30524		0.988588	1.52387e-06		-0.12367	0.198844		-0.755533	-0.701506
YJL016W	YJL016W	4.94205	4.92125	4.98868	4.90737	6.69697	6.26866	7.26087	7.32499		0.965086	1.54476e-06		0.0466394	-0.0138745		0.563905	1.05633
YDR044W	HEM13	11.2966	11.3128	11.3069	11.249	11.5324	11.4635	10.8924	10.9248		0.736981	1.54741e-06		0.0102182	-0.0638303		-0.640015	-0.538711
YJR137C	MET5	7.33163	7.22487	7.24916	7.2914	7.11374	7.0621	6.5331	6.52904		0.861499	1.56059e-06		-0.0824727	0.066531		-0.580646	-0.53306
YHR133C	NSG1	4.8505	5.06264	5.10392	4.92837	5.73633	5.67129	6.42844	6.4031		0.985853	1.56059e-06		0.253418	-0.13427		0.69211	0.731804
YPR102C	RPL11A	6.82197	6.82591	7.10276	7.51246	6.58706	6.41954	5.77873	5.48285		0.0101244	1.60041e-06		0.280798	0.686551		-0.808331	-0.936691
YJR094W-A	RPL43B	7.5194	7.67758	7.56102	7.37252	6.81109	7.38853	6.19219	5.86344		0.437191	1.60041e-06		0.0416202	-0.305062		-0.618891	-1.52509
YFL045C	SEC53	7.98134	7.91444	7.91862	7.84624	6.99548	6.8716	6.26754	6.23783		0.60818	1.70671e-06		-0.0627142	-0.0682024		-0.727949	-0.633766
YBR196C	PGI1	10.2048	10.0127	9.89058	9.9229	9.68569	9.56748	9.03576	9.04185		0.0596511	1.75258e-06		-0.314195	-0.0898397		-0.649934	-0.52563
Q0250	COX2	8.33257	8.67433	8.96275	8.95382	8.05577	8.31093	7.38974	7.6343		0.00874497	1.7763e-06		0.630178	0.279485		-0.666032	-0.676628
YMR116C	ASC1	8.91561	8.72124	8.56963	8.69551	8.6271	8.64483	8.05246	8.11671		0.159927	1.7763e-06		-0.345983	-0.0257292		-0.574637	-0.528122
YNL077W	APJ1	3.90785	4.05658	4.17073	4.21257	5.85873	6.1299	6.65693	6.64559		0.561713	1.77886e-06		0.262874	0.155986		0.798198	0.515685
YGL189C	RPS26A	9.6709	9.66972	9.85786	9.84634	9.03936	9.19798	8.53726	8.52042		0.399616	1.77995e-06		0.186953	0.176619		-0.502101	-0.677556
GTK30H01550	GTK30H01550	-3.47393	-2.55639	-1.59946	-1.8365	2.08066	1.77821	3.16672	3.11103		0.598984	1.77995e-06		1.87447	0.719892		1.08606	1.33282
YOR267C	HRK1	4.76075	4.83542	4.85748	4.63633	5.63488	5.81762	6.35315	6.33432		0.761792	1.80271e-06		0.0967302	-0.199084		0.718263	0.516695
YNL003C	PET8	5.41109	5.62994	5.5404	5.40429	6.67412	6.644	7.26997	7.33092		0.782404	1.84163e-06		0.129312	-0.225649		0.595847	0.686916
YPR181C	SEC23	7.90117	7.74234	7.61294	7.50541	8.70784	8.68085	9.22446	9.35652		0.0132136	1.85782e-06		-0.288226	-0.236929		0.516618	0.675666
YJL139C	YUR1	4.23955	4.38198	4.36317	4.45022	5.02059	4.96763	5.72	5.70681		0.919484	1.9056e-06		0.12362	0.068246		0.699414	0.739177
YMR069W	NAT4	0.584963	1.0072	1.38405	0.910733	2.5656	2.58015	3.74416	3.95977		0.80812	2.01142e-06		0.799087	-0.0964628		1.17856	1.37962
YOR315W	SFG1	5.15866	4.99322	5.5744	5.60763	4.95745	5.41752	4.35966	4.03386		0.000532662	2.08582e-06		0.415744	0.614405		-0.597789	-1.38365
YNR059W	MNT4	3.64039	3.93734	3.68482	3.75916	5.13052	5.09508	5.8824	5.71672		0.754504	2.11225e-06		0.0444292	-0.178189		0.751879	0.621636
YFL021C-A	YFL021C-A	3.0072	3.43696	2.38128	2.79701	4.13093	4.22805	5.14364	5.03078		0.101962	2.17428e-06		-0.625912	-0.639948		1.01271	0.802728
YOR103C	OST2	4.9814	5.21684	5.43229	5.38128	5.87627	5.81121	6.64976	6.48236		0.230838	2.29463e-06		0.450895	0.164441		0.773488	0.67115
YBL027W	RPL19B	9.56117	9.53041	9.48103	9.45341	8.70054	9.24289	8.22458	8.21612		0.494021	2.32434e-06		-0.0801409	-0.0769916		-0.475963	-1.02677
YJL080C	SCP160	7.33145	7.11873	7.08098	7.03375	7.25908	7.22072	6.68032	6.71026		0.170297	2.38936e-06		-0.250477	-0.0849801		-0.57876	-0.510461
YPL022W	RAD1	4.22574	4.16591	4.30816	4.19377	4.99865	4.99186	5.62673	5.58646		0.976193	2.40195e-06		0.0824193	0.0278598		0.628084	0.594603
YER070W	RNR1	6.12205	6.0555	5.9542	5.9028	5.12805	4.75969	4.1819	4.08746		0.168607	2.50898e-06		-0.167855	-0.152702		-0.946148	-0.672226
YDR158W	HOM2	6.43463	6.22188	6.32229	5.81737	5.7126	5.7057	5.03914	4.94298		0.257629	2.72157e-06		-0.11234	-0.40451		-0.673457	-0.762718
YNL305C	BXI1	6.03738	5.74416	6.20731	6.32876	7.15755	6.98025	7.67101	7.77413		0.0456969	2.78009e-06		0.169925	0.584604		0.513461	0.793874
YLR180W	SAM1	6.09824	6.0542	5.66477	5.68622	6.23093	6.64212	7.13011	7.17712		0.000128357	2.89823e-06		-0.433475	-0.367977		0.899174	0.534997
YJR047C	ANB1	8.74342	8.83668	8.45002	8.34438	8.3222	8.46025	7.69356	7.85206		0.000102868	2.95492e-06		-0.293405	-0.492297		-0.628642	-0.60819
YER119C	AVT6	4.01167	3.9982	3.8748	3.92979	4.04177	4.14486	4.80787	5.11353		0.643544	3.08608e-06		-0.136878	-0.0684045		0.766101	0.968672
YHR044C	DOG1	4.86344	4.87036	4.60822	4.71039	4.71315	4.58616	3.7126	3.43962		0.321664	3.09339e-06		-0.255225	-0.159972		-1.00055	-1.14654
YOR374W	ALD4	8.68078	8.60181	8.78999	8.86771	7.1014	6.81532	6.32229	6.24355		0.361717	3.15544e-06		0.109209	0.265903		-0.779109	-0.571764
YAL044C	GCV3	5.91025	6.10434	6.18051	5.80323	6.51001	6.39729	7.10967	7.08619		0.921629	3.20251e-06		0.270253	-0.30111		0.599662	0.6889
YPR183W	DPM1	7.31985	7.23688	7.13052	7.1036	7.23141	7.4025	6.71603	6.69223		0.167398	3.37889e-06		-0.189334	-0.133273		-0.515383	-0.710269
YBR249C	ARO4	7.90653	7.85705	8.04374	8.07452	7.07403	6.98823	6.48091	6.32012		0.436961	3.38332e-06		0.137208	0.217468		-0.593123	-0.668107
YGL070C	RPB9	4.93263	4.99503	5.24679	5.18428	5.74039	5.6865	6.51207	6.6091		0.578762	3.41276e-06		0.31416	0.189248		0.771681	0.922604
YBR207W	FTH1	4.52544	4.46401	4.42962	4.34696	4.80787	4.74147	5.51948	5.46891		0.585801	3.52847e-06		-0.0958265	-0.117058		0.711609	0.727442
YHR163W	SOL3	7.41473	7.38914	7.18339	7.11915	7.65191	7.70957	8.31093	8.20794		0.0144983	3.54788e-06		-0.23134	-0.269988		0.659018	0.498375
YDL100C	GET3	7.98829	7.96642	7.87885	7.93923	7.79077	7.82286	7.19535	7.28947		0.593971	3.54788e-06		-0.109439	-0.0271924		-0.595424	-0.533392
YLR406C	RPL31B	8.22713	8.27431	8.31619	8.17003	7.21043	7.73545	6.49921	6.72901		0.888184	3.65287e-06		0.0890564	-0.104283		-0.71122	-1.00645
YLR054C	OSW2	1.51096	1.66903	1.63691	1.44361	2.93546	3.34483	3.9279	4.29278		0.919178	3.74553e-06		0.125953	-0.22542		0.992437	0.947953
YDR214W	AHA1	6.9486	6.94977	7.10988	6.98299	7.85337	8.03941	8.51558	8.49965		0.835813	3.95726e-06		0.161282	0.0332252		0.66221	0.460234
YFR055W	IRC7	3.79181	3.55704	4.23496	3.55213	4.61824	4.59216	5.49346	5.4121		0.706392	4.22705e-06		0.443147	-0.00491131		0.875217	0.819946
YPL143W	RPL33A	8.10192	8.26613	7.95059	7.75181	7.35614	7.5549	6.72042	6.75756		0.00572546	4.22836e-06		-0.151338	-0.514319		-0.635729	-0.797339
YLR058C	SHM2	6.53636	6.40582	6.76845	6.63358	7.0054	6.93499	7.57637	7.52152		0.248621	4.3864e-06		0.232085	0.227754		0.570971	0.586534
YOR247W	SRL1	7.01044	6.56301	7.31034	6.94953	6.76607	6.29241	5.66249	5.61559		0.22338	4.54605e-06		0.299896	0.386529		-1.10357	-0.676821
YLR448W	RPL6B	9.69119	9.51341	9.37202	9.35634	8.84712	8.76802	8.28374	8.18507		0.0310163	4.63843e-06		-0.319169	-0.15707		-0.563383	-0.582945
YAL029C	MYO4	4.37921	4.25626	4.53356	4.57471	4.47249	4.52231	3.81147	3.92505		0.215244	4.66387e-06		0.154358	0.318451		-0.661017	-0.597257
YNL247W	YNL247W	4.73444	4.64962	4.81865	4.69432	4.68986	4.7845	3.94392	4.11353		0.951583	4.75499e-06		0.0842074	0.0447076		-0.745937	-0.67097
YPR119W	CLB2	4.99322	4.89045	4.90689	5.01881	4.30378	5.02636	3.64501	3.5435		0.976694	4.913e-06		-0.0863309	0.128365		-0.658771	-1.48286
YCR028C	FEN2	5.80349	5.69627	5.71507	5.52042	6.15097	5.76765	6.68061	6.75689		0.382661	5.02348e-06		-0.0884157	-0.17585		0.52964	0.989235
YMR120C	ADE17	4.47054	4.46597	4.55275	4.65363	5.72329	5.89506	6.49362	6.36054		0.753412	5.02886e-06		0.0822091	0.187659		0.77033	0.46548
YLR390W-A	CCW14	8.03711	7.89724	8.18968	8.04325	8.90087	8.49474	9.41697	9.47915		0.616213	5.0309e-06		0.152569	0.146006		0.5161	0.984418
YPL002C	SNF8	4.02503	4.10182	3.8846	3.85898	5.0648	4.85798	5.84373	5.76261		0.560279	5.18639e-06		-0.140431	-0.242843		0.778936	0.904634
YLR006C	SSK1	4.58075	4.43763	4.29205	4.54535	5.58526	5.76818	6.2636	6.28891		0.649796	5.42129e-06		-0.288703	0.107723		0.678335	0.520728
YGR090W	UTP22	5.34376	5.38301	5.51854	5.5656	5.06652	4.90929	4.37851	4.32193		0.451854	5.88717e-06		0.174772	0.182584		-0.688008	-0.587365
YJL108C	PRM10	0.214125	-1	-1.32193	-0.514573	2.21723	2.57531	3.19535	3.39094		0.549858	6.22986e-06		-1.53605	0.485427		0.978117	0.81563
YGL030W	RPL30	8.38193	8.46508	8.40638	8.18378	7.48212	7.65163	6.80103	6.93522		0.387735	6.30929e-06		0.0244429	-0.281292		-0.681093	-0.716402
YLL039C	UBI4	7.32184	7.44774	7.36045	7.54944	8.51523	8.1814	9.00921	9.06961		0.945559	6.67373e-06		0.0386141	0.101694		0.493986	0.88821
YNL196C	SLZ1	-0.888969	-1.05889	-0.0892673	-0.888969	-0.304006	-1	1.77821	2.04264		0.821699	6.69903e-06		0.799701	0.169925		2.08221	3.04264
YPR200C	ARR2	5.46728	5.40463	5.78816	5.51286	5.3302	5.24755	4.33557	3.99639		0.564205	6.79863e-06		0.320884	0.108228		-0.994631	-1.25116
YLR415C	YLR415C	2.09424	1.5656	2.18587	2.25399	5.23458	5.63865	6.44973	6.31651		0.824419	6.95157e-06		0.0916305	0.688392		1.21515	0.677855
GTK30D00130	GTK30D00130	5.90231	5.82807	6.19417	6.21665	7.05202	7.00326	7.69572	7.53434		0.0189628	7.13452e-06		0.291851	0.388576		0.643691	0.531077
YPL095C	EEB1	3.38543	3.66334	3.68706	3.48543	4.05398	4.33128	5.03694	4.94158		0.985853	7.35098e-06		0.30163	-0.177918		0.982963	0.610301
YBR054W	YRO2	2.31615	1.32193	2.28392	1.84398	3.53978	3.3505	4.51349	4.34696		0.897562	7.69535e-06		-0.032224	0.522056		0.973712	0.99646
YGR294W	PAU12	1.15056	1.24489	0.948601	-0.168123	2.26003	3.19219	4.38957	4.3799		0.683959	7.82725e-06		-0.201959	-1.41301		2.12954	1.1877
YKL074C	MUD2	3.28688	3.17951	3.22959	2.97453	4.0018	4.35544	5.04089	4.89966		0.708061	7.87909e-06		-0.0572932	-0.204982		1.03909	0.54422
YNL063W	MTQ1	2.90497	3.21101	2.41684	2.774	4.15381	4.39712	5.06221	5.17313		0.250717	7.98279e-06		-0.488126	-0.437016		0.908403	0.776009
YMR265C	YMR265C	3.73985	3.67129	3.21723	3.45418	4.44427	4.8495	5.43363	5.40429		0.0913457	8.12073e-06		-0.522617	-0.217117		0.989358	0.554791
YHR124W	NDT80	1.09761	1.83996	0.773996	0.847997	1.82375	2.08406	3.02857	3.04963		0.180441	8.24356e-06		-0.323614	-0.991963		1.20482	0.965567
YOL128C	YGK3	2.54844	2.80735	2.41684	3.26303	3.54844	3.48929	4.52168	4.35966		0.87126	8.95201e-06		-0.131597	0.455679		0.973242	0.870376
YKR071C	DRE2	3.75809	4.0635	4.06437	3.88947	4.89627	5.22689	5.74174	5.89336		0.985853	9.11116e-06		0.306276	-0.174029		0.845465	0.666468
YER131W	RPS26B	8.09149	8.39262	8.27891	8.22212	7.13965	7.8242	6.68018	6.34518		0.916765	9.14722e-06		0.187426	-0.170499		-0.45947	-1.47901
YOL039W	RPP2A	10.1303	10.1729	10.2783	10.1896	10.0797	10.6503	9.60888	9.67967		0.888184	9.29863e-06		0.148034	0.0166993		-0.470775	-0.970669
YHL036W	MUP3	4.53916	4.42694	4.52669	4.44427	5.44228	5.39541	5.97842	6.12453		0.939065	1.0161e-05		-0.012464	0.0173339		0.536144	0.729129
YMR021C	MAC1	3.41278	3.53107	3.49697	3.78555	3.92125	4.20163	4.82171	4.93782		0.803478	1.04549e-05		0.0841921	0.254481		0.900464	0.736181
YGR288W	MAL13	4.10518	3.99548	4.0054	4.29793	4.488	4.63923	5.24489	5.2817		0.903228	1.07561e-05		-0.0997752	0.302441		0.756886	0.642466
YOR133W	EFT1	6.09908	5.81198	5.69349	5.9364	5.3799	5.45779	4.84197	4.82273		0.457602	1.09647e-05		-0.405598	0.124418		-0.537925	-0.635061
YIR020C	YIR020C	2.67356	1.50589	2.69377	1.89918	3.69153	3.99367	5.11811	5.10852		0.936215	1.1018e-05		0.0202093	0.393285		1.42658	1.11485
YHR049W	FSH1	6.29884	6.55321	6.04941	6.1918	6.63894	6.53792	7.24963	7.17772		0.0342115	1.15474e-05		-0.249429	-0.361407		0.610692	0.639801
YGL225W	VRG4	6.2151	6.14792	5.41616	5.34518	6.79246	6.52685	7.24812	7.4441		6.50813e-15	1.1789e-05		-0.798932	-0.802734		0.455652	0.917253
YHR020W	YHR020W	7.376	7.39378	7.44642	7.47387	7.32427	7.24907	6.79038	6.72642		0.912927	1.19783e-05		0.0704265	0.0800915		-0.533889	-0.522643
YHR090C	YNG2	3.43429	3.04963	3.57046	3.38819	4.24489	4.78293	5.33735	5.58826		0.728523	1.20208e-05		0.136168	0.338559		1.09247	0.805332
YEL059W	HHY1	0.963474	0.378512	0.344828	0.555816	1.62293	2.7761	4.1819	4.0505		0.928791	1.21556e-05		-0.618646	0.177305		2.55897	1.2744
YGR032W	GSC2	8.23606	8.10779	8.24427	8.16842	9.60835	9.39836	10.1125	10.178		0.985853	1.25691e-05		0.00820664	0.0606289		0.504144	0.779659
YMR006C	PLB2	9.47289	9.31057	9.25524	9.16717	9.08212	9.05409	8.5371	8.56125		0.0900452	1.27974e-05		-0.217653	-0.1434		-0.545021	-0.492839
YGR141W	VPS62	3.3505	3.35332	3.48285	2.94673	3.84398	2.93168	4.72301	4.58135		0.790944	1.31883e-05		0.132351	-0.406592		0.879029	1.64967
YNL144C	YNL144C	5.48382	5.42391	5.66164	5.6427	4.75542	5.0343	4.26529	4.14731		0.34241	1.36684e-05		0.17782	0.218787		-0.490135	-0.886997
YFL018C	LPD1	6.54643	6.63401	6.78555	6.84134	6.54086	6.74106	6.11249	6.00742		0.27327	1.37074e-05		0.239119	0.207332		-0.428373	-0.733643
YJL064W	YJL064W	-0.304006	1.34483	-1.51457	0.286881	2.35896	3.25096	4.35332	4.37226		0.48476	1.43669e-05		-1.21057	-1.05795		1.99436	1.12129
YDR216W	ADR1	4.65821	4.68706	4.88753	4.71864	4.79233	4.77294	5.4266	5.29389		0.683664	1.45687e-05		0.229314	0.0315749		0.634265	0.520944
YOL109W	ZEO1	4.69432	5.01391	5.26716	4.91886	6.24622	7.10873	7.74779	7.71877		0.703586	1.46069e-05		0.572838	-0.0950456		1.50157	0.610039
YGR240C	PFK1	9.3912	9.16229	9.16481	9.18567	8.4709	8.514	7.99498	7.97928		0.428155	1.50297e-05		-0.226394	0.0233777		-0.475927	-0.534722
YGR197C	SNG1	4.41616	4.56803	4.56316	4.69153	5.2211	5.09887	5.79468	5.83289		0.802438	1.51865e-05		0.146994	0.123502		0.573572	0.734016
YOR007C	SGT2	6.60155	6.75422	6.59857	6.62366	7.36107	7.12422	7.90875	7.81922		0.61127	1.53427e-05		-0.00297432	-0.130557		0.547686	0.694996
GTK30H02780	GTK30H02780	2.26604	2.18903	2.18587	2.21101	2.848	2.01078	3.7761	3.62994		0.936374	1.53427e-05		-0.0801703	0.0219784		0.928107	1.61916
YCL002C	YCL002C	3.88362	3.7301	3.98094	3.72137	5.01033	4.64847	5.67101	5.5656		0.985853	1.53427e-05		0.0973184	-0.00872381		0.660678	0.917132
YDR011W	SNQ2	7.12153	7.05918	7.17223	7.14017	7.90623	7.84505	8.40237	8.42286		0.937871	1.56891e-05		0.050694	0.0809829		0.496143	0.577813
YDR319C	YFT2	3.3147	3.35896	3.39643	3.55582	4.32481	3.2765	5.13463	5.22612		0.89975	1.66241e-05		0.081737	0.196857		0.809821	1.94963
YIL078W	THS1	7.02337	6.97373	6.94064	6.9479	6.38888	6.40735	5.87652	5.852		0.649671	1.69069e-05		-0.0827296	-0.0258262		-0.512361	-0.555354
YLR175W	CBF5	6.65492	6.64717	6.55597	6.46597	6.3203	6.64717	5.85773	5.87258		0.255678	1.6968e-05		-0.0989529	-0.181196		-0.462572	-0.774588
YBL076C	ILS1	7.5803	7.49281	7.64746	7.53807	7.30469	7.28586	6.832	6.76699		0.972976	1.89807e-05		0.0671622	0.0452579		-0.47269	-0.518872
Q0120	BI4	3.22188	3.15704	3.65306	3.52231	3.23573	3.21568	2.63459	2.4489		0.00572546	2.13517e-05		0.431183	0.365263		-0.601134	-0.766778
YNL321W	VNX1	5.01837	4.95884	5.10098	5.13791	5.80193	5.78215	6.28577	6.39386		0.69369	2.13517e-05		0.0826105	0.179071		0.483837	0.611716
YAL038W	CDC19	11.8177	11.8311	11.6426	11.5661	11.0436	10.7602	10.2407	10.3239		0.00593571	2.20724e-05		-0.175087	-0.264957		-0.802897	-0.436317
YDR136C	VPS61	-0.971431	1.17632	0.9855	0.613532	1.32769	0.925999	3.0268	2.87381		0.897176	2.20724e-05		1.95693	-0.562791		1.69911	1.94781
YCR084C	TUP1	7.96203	7.73789	8.04056	8.04434	7.01569	7.33485	6.63081	6.60777		0.435933	2.40153e-05		0.0785353	0.30645		-0.384881	-0.72708
YMR230W	RPS10B	6.75942	6.99254	7.06016	7.10098	6.61574	6.65163	6.08979	5.79831		0.463218	2.4273e-05		0.300733	0.108436		-0.525945	-0.853316
YLR455W	PDP3	5.09297	4.74524	4.8166	4.7845	5.42492	5.65163	6.20203	6.19554		0.616197	2.4273e-05		-0.276369	0.0392667		0.777104	0.543919
YOR318C	YOR318C	1.39506	1.49057	1.19535	1.66448	3.3147	3.73444	4.72574	5.11645		0.985853	2.4273e-05		-0.199715	0.173913		1.41104	1.38201
YLR347C	KAP95	6.55351	6.31034	6.53885	6.42122	6.75596	6.6872	7.22843	7.25541		0.985853	2.43121e-05		-0.0146656	0.110883		0.472478	0.568206
GTK30F00240	GTK30F00240	1.01436	0.847997	1.18269	1.43829	2.80323	2.81147	3.60881	3.74201		0.630192	2.45956e-05		0.168337	0.590296		0.805582	0.930535
YML073C	RPL6A	8.5256	8.29994	8.25087	8.22988	7.58939	7.54898	7.05376	6.90545		0.193562	2.47739e-05		-0.274732	-0.0700644		-0.535626	-0.643529
YAL060W	BDH1	7.09223	6.95606	6.87431	6.92884	7.0517	7.25276	7.67179	7.72629		0.358462	2.5225e-05		-0.217923	-0.0272126		0.62009	0.473526
Q0275	COX3	9.38871	9.50226	9.96587	9.76379	9.41028	9.19913	8.74947	8.76616		0.00142664	2.58307e-05		0.577165	0.261538		-0.660815	-0.432968
YKL065C	YET1	6.30961	6.14873	6.5281	6.14588	7.00248	6.87098	7.54851	7.5306		0.832639	2.59465e-05		0.21849	-0.00284957		0.546036	0.65962
YML026C	RPS18B	10.6577	10.6028	10.5109	10.5377	9.94864	10.2667	9.60348	9.45506		0.388079	2.69684e-05		-0.146809	-0.0650875		-0.345167	-0.811645
GTK30F00250	GTK30F00250	4.8674	4.83794	5.05702	5.04832	5.46826	5.31143	5.96578	6.05528		0.424229	2.69684e-05		0.189615	0.21038		0.497527	0.743852
YPR163C	TIF3	7.47403	7.48985	7.36282	7.20555	6.80116	7.27352	6.42559	6.33914		0.0964561	2.69872e-05		-0.11121	-0.284299		-0.375565	-0.934379
YCR028C-A	RIM1	6.40224	6.36282	6.50208	6.4353	5.69572	5.71727	4.92695	5.02148		0.888184	2.72011e-05		0.0998313	0.0724747		-0.768767	-0.695785
YHR097C	YHR097C	3.41278	3.29866	3.51096	3.68818	5.00675	5.39541	5.87332	5.93475		0.594889	2.76288e-05		0.0981804	0.389522		0.866574	0.539347
YLR218C	COA4	2.59455	2.926	2.95047	2.21412	1.52607	2.31904	4.10098	3.46074		0.897098	2.76288e-05		0.35592	-0.711875		2.57491	1.1417
YMR309C	NIP1	6.28799	6.1152	6.27072	6.31361	5.8125	5.78869	5.28688	5.19889		0.885101	2.79803e-05		-0.0172735	0.198409		-0.525617	-0.589799
YMR210W	MGL2	1.97453	2.64847	2.45943	2.22342	3.08576	2.83794	4.04876	3.80116		0.973152	2.7998e-05		0.484902	-0.425043		0.962995	0.963215
YOR312C	RPL20B	8.94585	9.02522	9.0359	8.93154	8.15553	8.63557	7.62059	7.79494		0.897098	2.85209e-05		0.0900453	-0.0936873		-0.53494	-0.840637
YJL092W	SRS2	4.79025	4.44228	4.66676	4.60881	4.56925	4.75489	4.07895	4.05745		0.964811	2.88518e-05		-0.123494	0.166529		-0.490297	-0.697437
YKL009W	MRT4	5.23189	5.05788	5.08321	4.90737	5.37191	5.37747	6.17832	5.98482		0.529638	2.99755e-05		-0.14868	-0.150512		0.806409	0.607346
YNR034W	SOL1	2.84197	3.24945	3.14568	2.94486	4.6565	4.95745	5.48382	5.64703		0.962117	3.08217e-05		0.303704	-0.304587		0.827319	0.689576
GTK30L00130	GTK30L00130	5.63546	5.57259	5.59902	5.69125	6.68622	6.66633	7.15299	7.26529		0.998323	3.10323e-05		-0.036444	0.118668		0.466774	0.598956
YEL009C	GCN4	9.95405	9.87391	10.1915	10.1156	9.49675	9.39431	8.96996	8.90911		0.115653	3.17707e-05		0.237428	0.241684		-0.526792	-0.4852
YML056C	IMD4	7.22458	7.15188	6.92255	6.91349	7.03584	6.98755	7.54257	7.50128		0.00728119	3.21096e-05		-0.302026	-0.238391		0.506724	0.513732
YMR194W	RPL36A	8.54693	8.36903	8.75926	8.86839	8.21558	8.56894	7.80678	7.71177		0.020164	3.3527e-05		0.212323	0.49936		-0.408806	-0.857174
YER102W	RPS8B	7.41886	7.23745	7.37434	7.21713	6.70252	6.55136	5.97338	5.9697		0.807813	3.3962e-05		-0.0445206	-0.0203152		-0.729137	-0.581659
YBL094C	YBL094C	3.03914	2.87381	2.65764	2.27798	3.75489	2.85798	4.86641	4.75702		0.567696	3.49498e-05		-0.381498	-0.595828		1.11153	1.89904
YNL251C	NRD1	6.36036	6.0594	6.44973	6.4116	6.29112	6.15947	6.81301	6.75676		0.39728	3.93573e-05		0.0893622	0.352197		0.521887	0.597289
YAL040C	CLN3	5.04701	4.853	4.73823	4.83137	5.70984	5.6907	6.25833	6.26059		0.296851	3.94803e-05		-0.308787	-0.021627		0.548488	0.569894
YFL048C	EMP47	4.21179	4.27128	4.28392	4.21801	4.82222	5.32229	5.80813	5.82299		0.957226	4.05378e-05		0.0721308	-0.0532701		0.985907	0.500696
YNL167C	SKO1	4.3978	4.13914	4.52105	4.48091	5.46041	5.3067	6.01748	5.94322		0.401799	4.05756e-05		0.123248	0.341769		0.557062	0.636518
YOR032W-A	YOR032W-A	1.26303	2.68482	2.28688	3.0072	3.52982	3.8339	5.17991	5.03562		0.774861	4.09766e-05		1.02385	0.322377		1.65009	1.20172
YKR052C	MRS4	4.10769	4.51728	4.21179	4.24031	4.40871	4.52795	5.19495	5.23993		0.73505	4.10206e-05		0.104103	-0.276961		0.786242	0.711987
GTK30F00220	GTK30F00220	1.76977	2.01078	0.356144	-0.836501	1.54102	1.55582	2.52356	2.96901		6.13363e-07	4.24989e-05		-1.41363	-2.84728		0.982543	1.4132
YNR014W	YNR014W	4.44692	3.81558	4.90207	4.9528	4.66107	4.4019	5.29793	5.54967		0.00231169	4.24989e-05		0.455156	1.13722		0.63686	1.14777
YGL137W	SEC27	6.69961	6.58826	6.78751	6.78777	6.63285	6.80735	6.26021	6.1645		0.616455	4.29147e-05		0.0879037	0.199507		-0.372636	-0.64285
YGR023W	MTL1	2.48285	2.41143	3.1177	3.07382	4.67356	5.01703	5.52388	5.49313		0.00768532	4.35304e-05		0.634847	0.662394		0.850319	0.476104
YPR010C	RPA135	6.45236	6.27426	6.27705	6.35421	5.66903	5.74766	5.19101	5.2075		0.723029	4.35304e-05		-0.17531	0.0799436		-0.478017	-0.540153
YNL209W	SSB2	9.18968	9.00977	8.8019	8.86233	8.33816	8.2798	7.84191	7.80806		0.00983619	4.36955e-05		-0.387774	-0.147445		-0.496247	-0.471733
YBL003C	HTA2	7.40812	7.37034	7.20114	6.94451	5.79753	6.31741	5.28392	4.71149		0.0161635	4.45426e-05		-0.206974	-0.425832		-0.51361	-1.60592
YJL196C	ELO1	5.82248	5.8189	5.72	5.45976	5.28614	5.15866	5.87848	5.89821		0.137696	4.57171e-05		-0.10247	-0.359142		0.592338	0.739548
YJR011C	YJR011C	3.29719	3.35473	3.37016	3.36177	4.02148	4.17313	4.95931	4.91073		0.995986	4.6616e-05		0.0729729	0.00703412		0.937827	0.737605
YHR010W	RPL27A	8.72581	8.8604	8.54427	8.3315	7.85922	8.40998	7.46671	7.3978		0.00234468	4.77085e-05		-0.18154	-0.528905		-0.392515	-1.01218
YJL210W	PEX2	4.60051	4.56925	5.09466	5.09887	4.765	4.66221	5.38094	5.57561		0.00556434	4.77477e-05		0.494151	0.529626		0.615933	0.913409
YDL180W	YDL180W	3.74524	3.64155	3.72356	3.77294	4.47444	4.28836	5.00944	5.142		0.985853	4.77477e-05		-0.0216788	0.131395		0.535001	0.853646
YOR394W	PAU21	4.31034	4.44294	5.04963	5.17991	8.05713	7.54264	7.0917	7.00371		0.00134468	4.77814e-05		0.739291	0.736966		-0.965425	-0.53893
YLR249W	YEF3	11.2176	11.0225	10.9248	10.9718	10.474	10.3833	9.95031	9.84759		0.100367	4.77814e-05		-0.292714	-0.050634		-0.523692	-0.535758
YKR091W	SRL3	4.60466	4.81147	4.79701	4.93263	5.70764	5.75862	6.27743	6.53745		0.800573	4.83939e-05		0.192349	0.121157		0.569792	0.778828
YOR168W	GLN4	5.43263	5.42828	5.51507	5.3733	4.72137	5.05311	4.27724	4.20633		0.953348	4.94962e-05		0.0824436	-0.0549762		-0.444132	-0.846781
YNR009W	NRM1	3.75702	3.22959	3.74953	3.64386	3.05658	3.24031	1.95977	1.36177		0.823497	5.1776e-05		-0.00748898	0.414268		-1.09681	-1.87855
YIR024C	INA22	2.93923	2.98914	3.51223	2.89724	3.87774	3.53356	4.6792	4.7241		0.748744	5.20799e-05		0.573	-0.0918986		0.801454	1.19054
YNL159C	ASI2	4.57713	4.49825	4.60407	4.68032	5.19022	5.34837	5.89627	5.95675		0.895007	5.20799e-05		0.0269447	0.182073		0.706052	0.60838
YKR057W	RPS21A	7.51987	7.69815	7.48277	7.37981	6.67511	7.30067	5.95303	6.16752		0.249547	5.30697e-05		-0.0371045	-0.318337		-0.722078	-1.13315
YER012W	PRE1	6.50573	6.644	6.41278	6.52888	6.76288	6.83832	6.20496	6.19515		0.515718	5.42846e-05		-0.0929506	-0.115117		-0.557918	-0.643171
YDR528W	HLR1	4.77926	4.64674	5.11228	5.01257	4.55397	4.80012	3.98003	3.86196		0.059233	5.4754e-05		0.333023	0.36583		-0.57395	-0.938168
YPL017C	IRC15	4.62527	4.51538	4.32121	4.54782	4.75382	4.8953	5.3505	5.68229		0.505746	5.50107e-05		-0.304064	0.0324355		0.596679	0.78699
YDL084W	SUB2	7.43045	7.41895	7.4297	7.3875	7.0881	7.08948	6.6153	6.54566		0.836695	5.50107e-05		-0.000752907	-0.0314485		-0.472801	-0.543817
YCR009C	RVS161	5.53605	5.73931	5.72383	5.63314	6.07146	6.3036	6.79429	6.78437		0.985853	5.50107e-05		0.187779	-0.106168		0.722824	0.480775
YHR141C	RPL42B	7.95262	8.147	8.01112	7.88685	7.22014	7.88166	6.74066	6.72397		0.498818	5.58717e-05		0.0584906	-0.260146		-0.479479	-1.1577
YLL051C	FRE6	5.10392	5.11645	5.26491	5.25134	5.8824	5.80503	6.37434	6.38024		0.611973	5.96118e-05		0.160994	0.134892		0.491945	0.57521
GTK30A00970	GTK30A00970	3.03386	2.97269	3.24031	3.16189	3.98823	3.26153	4.66903	4.63575		0.69679	5.96731e-05		0.206451	0.189195		0.680797	1.37422
YBR086C	IST2	6.43829	6.22284	6.44294	6.41498	6.43162	6.58135	5.96509	6.05202		0.862378	6.14077e-05		0.00465064	0.192138		-0.466531	-0.529327
YER130C	COM2	4.22728	3.99548	4.48607	4.34979	5.18031	5.2709	5.7926	5.86567		0.239509	6.22688e-05		0.258792	0.354305		0.612288	0.594769
YPL037C	EGD1	9.32227	9.23635	9.11601	9.31531	8.56883	8.20579	7.75415	7.76467		0.69369	6.67095e-05		-0.20626	0.078959		-0.814678	-0.441121
YML053C	YML053C	4.1811	4.35755	4.38612	4.1035	3.81147	3.8679	2.79494	2.42223		0.936378	6.74619e-05		0.205019	-0.254054		-1.01654	-1.44566
YHR174W	ENO2	12.3704	12.2017	11.9962	11.9373	12.0511	12.0065	11.4791	11.5512		0.000194085	6.79356e-05		-0.374203	-0.264304		-0.571931	-0.455359
GTK30N03930	GTK30N03930	6.22439	6.0691	6.11853	6.15745	5.81737	5.77531	5.24222	5.32661		0.877554	6.80537e-05		-0.105862	0.0883474		-0.575146	-0.448705
YAR002C-A	ERP1	7.44617	7.4623	7.48188	7.34767	7.44153	7.8674	7.02259	7.053		0.748744	6.90049e-05		0.0357066	-0.114632		-0.418944	-0.8144
YNL160W	YGP1	5.15664	5.11395	5.49601	5.61117	7.8327	7.38569	8.23084	8.42492		0.0105743	6.98174e-05		0.339376	0.497222		0.398137	1.03923
YGL076C	RPL7A	6.91564	6.97694	6.59425	6.34837	6.02923	6.02835	5.50048	5.12102		2.09225e-05	6.98327e-05		-0.32139	-0.628562		-0.528749	-0.907333
YJL154C	VPS35	4.69098	4.51602	4.6837	4.55397	5.34234	5.40224	5.83719	5.96855		0.965086	7.06197e-05		-0.00727928	0.0379597		0.494845	0.566307
YEL036C	ANP1	5.31506	5.39232	5.16471	5.12598	5.81198	6.05224	6.50255	6.49281		0.10828	7.07571e-05		-0.150353	-0.266336		0.690569	0.440573
YDL075W	RPL31A	8.57815	8.73593	8.66544	8.27207	7.6359	8.24916	7.1644	7.21975		0.340913	7.26143e-05		0.0872963	-0.463858		-0.471495	-1.02941
YBL055C	YBL055C	4.53481	4.38474	4.52105	4.47573	5.72683	5.54442	6.29131	6.20085		0.998939	7.26559e-05		-0.0137579	0.0909928		0.564478	0.656426
YOR175C	ALE1	9.44758	9.20033	9.19222	9.26155	9.13217	9.31617	8.72891	8.75097		0.484519	7.29059e-05		-0.25536	0.0612197		-0.403259	-0.565193
YIR031C	DAL7	3.64039	3.52982	3.54844	3.69042	4.56621	4.49506	5.07253	5.33521		0.985853	7.57859e-05		-0.0919529	0.160596		0.506328	0.840156
YOR212W	STE4	5.86962	5.90761	5.84273	5.76208	5.51854	5.66164	4.94533	5.01659		0.53294	7.62791e-05		-0.0268972	-0.145529		-0.573208	-0.64505
YAL034C	FUN19	4.05224	4.01614	4.41414	4.34341	5.15906	5.11312	5.79883	5.70543		0.145988	7.63836e-05		0.361894	0.327268		0.639764	0.592308
YEL047C	FRD1	8.05842	7.72431	7.99859	8.13196	7.50605	7.37565	6.96336	6.90087		0.644806	7.64501e-05		-0.0598343	0.407651		-0.542691	-0.474781
YLR286C	CTS1	7.91067	7.66562	7.9462	7.80058	8.17288	8.21951	7.75482	7.72921		0.905844	7.73314e-05		0.0355318	0.134956		-0.418057	-0.490295
YER023W	PRO3	7.46189	7.41523	7.43863	7.56704	7.11166	7.19918	6.63358	6.62921		0.952626	7.81968e-05		-0.0232631	0.151809		-0.478081	-0.569971
YOR176W	HEM15	7.39746	7.50502	7.33825	7.41168	7.59716	7.74382	8.14124	8.17348		0.577754	7.85127e-05		-0.0592146	-0.0933371		0.54408	0.429653
YGL193C	YGL193C	4.77294	4.76235	4.95373	5.13873	6.3127	5.93993	6.97258	6.88301		0.618641	7.89347e-05		0.18079	0.376384		0.659876	0.943078
YPL079W	RPL21B	7.14486	7.11603	6.9216	7.01948	6.26922	6.5601	5.69209	5.87799		0.195923	7.89998e-05		-0.223259	-0.0965525		-0.577128	-0.682114
YMR217W	GUA1	7.78692	7.63923	7.71184	7.65542	7.28263	7.17682	6.73904	6.72083		0.784709	7.94071e-05		-0.075084	0.0161912		-0.543587	-0.455996
YMR015C	ERG5	3.91934	3.95699	4.66619	4.50398	3.58736	3.74739	4.58075	4.28466		1.55204e-05	8.25092e-05		0.746848	0.546999		0.993384	0.537275
CpXylA	CpXylA	13.3493	13.2441	13.2381	12.9452	12.7223	12.9945	12.3463	12.2759		0.0954707	8.25092e-05		-0.111205	-0.298936		-0.376001	-0.718618
YHR151C	MTC6	5.01257	5.0063	5.19061	5.06781	5.43029	5.64068	6.08534	6.11207		0.767254	8.25092e-05		0.178046	0.0615128		0.655054	0.471396
YLR353W	BUD8	3.9855	3.95884	3.90207	3.63459	3.851	4.09508	3.23266	3.1811		0.346669	8.47594e-05		-0.0834269	-0.324249		-0.618339	-0.913978
YGL199C	YGL199C	1.91073	1.60881	1.05658	1.45943	3.05485	3.78346	4.68818	4.55827		0.649671	8.65688e-05		-0.854149	-0.149378		1.63333	0.774811
YLR325C	RPL38	10.1968	10.2953	9.98579	9.85849	9.11333	9.65388	8.77004	8.69317		0.00215201	8.87423e-05		-0.211026	-0.436758		-0.343289	-0.960711
YJL136C	RPS21B	7.24051	7.46499	7.43488	7.2867	6.86381	7.54975	6.06286	6.44477		0.939065	8.87423e-05		0.194373	-0.178299		-0.800959	-1.10498
YKL185W	ASH1	5.32157	5.30889	5.64039	5.53263	5.66931	5.64674	5.17033	5.01792		0.107698	8.98095e-05		0.318822	0.223744		-0.498985	-0.628817
YCL050C	APA1	5.94626	6.08852	6.16007	5.97934	6.51238	6.48059	7.08683	6.99266		0.985853	8.99868e-05		0.21381	-0.109184		0.574441	0.512067
YNL300W	TOS6	7.87621	7.47857	7.91163	7.91079	5.56712	5.97636	4.97453	4.51728		0.451621	9.0358e-05		0.0354217	0.432225		-0.59259	-1.45909
YCR095C	OCA4	3.68482	3.46858	3.99639	3.90593	4.34908	4.75489	5.32697	5.26828		0.214385	9.08041e-05		0.31157	0.437345		0.977887	0.513397
YOR208W	PTP2	3.56803	3.46989	3.61471	3.54844	4.75007	4.7137	5.40599	5.22766		0.972673	9.14772e-05		0.0466777	0.0785506		0.655922	0.513968
YGL012W	ERG4	6.71959	6.73579	6.84536	6.9292	7.65714	7.77827	8.15026	8.25215		0.552505	9.32317e-05		0.12577	0.193406		0.493115	0.473871
YER177W	BMH1	9.52538	9.46453	9.43361	9.37543	9.36475	9.42616	8.90839	8.97246		0.429907	9.33178e-05		-0.0917775	-0.0890949		-0.456355	-0.453697
YHR140W	YHR140W	-0.577767	0.669027	0.641546	0.163499	0.85599	0.0703893	2.37016	2.48027		0.941939	9.37227e-05		1.21931	-0.505528		1.51417	2.40988
YMR145C	NDE1	3.74308	3.81455	4.32048	4.22728	3.97085	4.31397	5.61383	4.69988		0.00445113	9.43108e-05		0.577401	0.412729		1.64297	0.385913
YMR012W	CLU1	6.07703	5.90424	6.24546	6.26978	5.57592	5.65621	5.17752	5.05961		0.134381	9.46444e-05		0.168428	0.365538		-0.398398	-0.596595
YPL221W	FLC1	6.08428	6.08916	5.99209	6	6.89893	6.92778	7.41405	7.35623		0.473643	9.54764e-05		-0.0921883	-0.0891591		0.515117	0.428454
YDR341C	YDR341C	6.17193	6.23611	6.0936	5.95931	5.66021	5.54844	5.08364	4.98413		0.14572	9.68677e-05		-0.0783249	-0.276803		-0.576571	-0.564303
YLR333C	RPS25B	8.77841	8.75445	8.93978	8.61117	8.35658	8.52368	7.86864	7.94193		0.973372	9.72724e-05		0.161379	-0.143281		-0.487947	-0.581752
YNL114C	YNL114C	-0.200913	0.214125	-1.39593	-1.21759	2.88947	2.15704	3.96993	4.18269		0.60673	0.000103714		-1.19502	-1.43172		1.08046	2.02565
YBR302C	COS2	2.0321	2.09761	1.61824	2.03914	2.51854	2.25096	3.33342	3.60051		0.716974	0.000104036		-0.413862	-0.0584724		0.814889	1.34955
YIR028W	DAL4	1.71809	1.5509	1.32193	1.76129	3.47249	3.54844	4.2032	4.21257		0.890338	0.000110597		-0.396159	0.210385		0.730713	0.664133
YKL068W-A	YKL068W-A	6.69933	6.4261	7.00338	7.07735	7.36833	7.08257	7.83838	8.01419		0.0169303	0.000113472		0.304048	0.651253		0.470053	0.931613
YER141W	COX15	5.52513	5.41075	5.59216	5.51065	5.51317	5.48864	6.08852	6.02104		0.897098	0.000116377		0.0670288	0.0998974		0.575348	0.532392
YNL264C	PDR17	3.22188	3.37295	3.54967	3.10434	3.49697	3.46336	4.45878	4.21956		0.985853	0.000120435		0.327792	-0.268615		0.961802	0.756195
YIR044C	YIR044C	2.98732	3.05832	2.93357	2.94111	3.86196	3.3147	4.48285	4.59634		0.837232	0.00012213		-0.0537482	-0.11721		0.620893	1.28164
YNL066W	SUN4	7.44269	7.31161	7.25522	7.19781	7.61824	7.44865	6.97016	7.06555		0.225157	0.000125159		-0.187477	-0.113806		-0.648075	-0.383102
YCL038C	ATG22	6.65134	6.55259	6.73566	6.76275	7.90905	7.42223	8.37682	8.35628		0.60818	0.000125783		0.0843188	0.210155		0.467767	0.934043
YNL127W	FAR11	3.62293	3.87184	3.87184	3.86493	4.37016	4.55459	4.98322	5.07296		0.85164	0.000126167		0.248913	-0.00691468		0.613057	0.518374
YMR277W	FCP1	4.99277	4.99322	5.10727	5.03826	4.63981	5.2292	4.23649	4.17473		0.903482	0.000140769		0.114501	0.0450391		-0.403318	-1.05448
YLR009W	RLP24	5.85674	5.59455	5.75355	5.82909	5.16108	5.56986	4.53667	4.5435		0.977708	0.000143495		-0.103186	0.23454		-0.624407	-1.02636
YGR041W	BUD9	4.36877	4.26978	4.36036	4.34056	3.93168	4.06178	3.17951	3.30451		0.985853	0.000144611		-0.00840407	0.070781		-0.752172	-0.757265
YPL106C	SSE1	8.39472	8.16682	8.01703	8.07039	9.55488	9.79777	10.2049	10.1682		0.0456967	0.000152448		-0.377689	-0.0964265		0.649988	0.370471
GTK30J00130	GTK30J00130	6.34572	6.35685	6.32229	6.44642	6.78869	6.72914	7.20662	7.35059		0.985853	0.000156567		-0.023427	0.0895736		0.417938	0.621441
YML048W	GSF2	7.68923	7.63016	7.66789	7.6034	7.30779	7.38681	6.79286	6.93003		0.802594	0.00016418		-0.0213371	-0.0267541		-0.514937	-0.456783
YLR233C	EST1	2.73769	2.29866	2.69377	2.7761	2.43029	2.59216	3.33628	3.32625		0.736656	0.000164371		-0.043921	0.477446		0.905998	0.734092
GTK30K00170	GTK30K00170	6.78529	6.58015	6.73322	5.75195	8.16687	8.40054	9.05997	9.00065		0.618641	0.000166272		-0.0520702	-0.8282		0.8931	0.60011
YIL067C	YIL067C	4.90063	4.76553	4.91648	5.13586	5.27798	5.21607	5.7939	5.76527		0.518772	0.00016761		0.0158513	0.370328		0.515911	0.549203
YAL024C	LTE1	3.25248	3.09761	3.3799	3.36737	3.0268	3.36877	2.5509	2.43563		0.48476	0.0001677		0.127422	0.26976		-0.475899	-0.93314
YNL322C	KRE1	7.29811	7.30515	7.32643	7.4143	7.6327	7.81845	8.17463	8.2546		0.939065	0.000176294		0.0283211	0.109155		0.541922	0.436149
YOR171C	LCB4	2.38957	2.31615	2.38681	2.10769	2.45681	2.29572	3.42089	3.12928		0.8374	0.000180489		-0.00275587	-0.208458		0.96408	0.83356
YDR510W	SMT3	8.19219	8.18849	8.10198	7.94046	7.43463	7.71727	6.97051	6.97877		0.188486	0.000182761		-0.0902185	-0.24803		-0.46412	-0.738497
YJL065C	DLS1	4.63865	4.47314	4.61294	4.35966	5.01033	5.4192	6.0691	5.90665		0.880506	0.000184177		-0.0257109	-0.113476		1.05877	0.487448
YBR203W	COS111	5.32301	5.41853	5.80478	5.75034	5.17233	4.93546	5.70487	5.56864		0.00178273	0.000185893		0.481767	0.331811		0.532544	0.63318
YDL039C	PRM7	5.4545	5.21839	5.47541	5.52795	6.5051	6.10538	6.99628	6.89142		0.594889	0.000191625		0.0209043	0.309552		0.491179	0.786034
YGL173C	XRN1	6.33914	6.24012	6.30816	6.42492	6.23247	6.0936	5.66363	5.7137		0.911016	0.000194194		-0.0309804	0.184799		-0.56884	-0.379907
YEL017C-A	PMP2	6.64386	6.99107	6.42593	5.93617	7.58706	7.58451	8.13391	8.44473		0.0209994	0.000196526		-0.217927	-1.0549		0.546848	0.860213
YNL193W	YNL193W	2.82782	2.97636	3.0635	3.06867	4.05398	3.82883	4.64443	4.61765		0.820816	0.000212974		0.235684	0.0923072		0.590453	0.788816
GTK30H00100	GTK30H00100	4.98823	5.11645	5.38163	5.5008	6.09466	5.65535	6.66463	6.4843		0.0313133	0.00021638		0.393399	0.384354		0.569967	0.828947
YEL053C	MAK10	3.65191	3.65306	3.72683	3.69153	3.45022	3.30159	2.55582	2.63459		0.985853	0.000217566		0.0749185	0.0384741		-0.894405	-0.666994
GTK30L00180	GTK30L00180	3.26003	3.41954	3.29719	3.34056	3.94111	3.7666	4.59991	4.49633		0.897562	0.000226344		0.0371658	-0.0789766		0.658807	0.729739
YJR025C	BNA1	3.43962	3.27501	4.33628	4.29866	2.70487	3.34625	1.28096	1.26903		0.000838864	0.000229354		0.89666	1.02365		-1.42392	-2.07721
YOR079C	ATX2	3.82579	4.15623	4.26228	3.93263	4.66676	4.92695	5.45943	5.46663		0.919484	0.000229949		0.436497	-0.223607		0.792675	0.539679
YJL042W	MHP1	5.80038	5.54998	5.77663	5.83592	5.69794	5.69432	6.16108	6.14588		0.752055	0.000230735		-0.0237518	0.285947		0.463141	0.451558
YNL145W	MFA2	10.8211	10.6967	11.5838	11.4551	10.1632	9.9131	9.57467	9.31066		1.06834e-12	0.000233386		0.762648	0.75842		-0.588565	-0.602441
YDR238C	SEC26	6.42055	6.39043	6.33967	6.42021	6.35667	6.3658	5.88313	5.93286		0.804224	0.00023346		-0.0808779	0.0297859		-0.47354	-0.432933
YJL105W	SET4	6.81468	6.83693	6.98766	6.97384	7.02126	7.11333	6.56514	6.65019		0.553991	0.000235021		0.172983	0.136907		-0.456117	-0.463135
Q0110	BI2	3.03738	3.22651	3.29572	3.30889	3.43429	3.69377	2.66676	2.88947		0.752183	0.000236139		0.258341	0.0823765		-0.767538	-0.804292
YFR015C	GSY1	6.39506	6.49745	6.60348	6.70321	6.07403	6.31633	5.60644	5.75248		0.3635	0.000236277		0.208415	0.205759		-0.467592	-0.563846
YML024W	RPS17A	7.33414	7.46222	7.23869	7.04614	6.71644	6.89336	6.09908	6.26097		0.0564675	0.000246406		-0.0954478	-0.416074		-0.617357	-0.632396
YOR335C	ALA1	6.73363	6.66121	6.53993	6.4888	6.31524	6.29297	5.80967	5.88435		0.0970716	0.000250167		-0.193691	-0.172404		-0.505568	-0.408612
YDR091C	RLI1	6.74456	6.58015	6.75876	6.77294	6.02636	5.84222	5.40463	5.3978		0.832639	0.000252644		0.0141914	0.192796		-0.621727	-0.444422
YBL089W	AVT5	3.88947	3.66448	3.76341	4.0635	4.65076	4.39163	5.09424	5.12846		0.793332	0.000259612		-0.126062	0.39902		0.443472	0.736828
YHL016C	DUR3	1.8953	1.54597	1.82782	1.51602	3.06005	3.11603	3.69822	3.90689		0.937677	0.000260982		-0.0674836	-0.0299532		0.638171	0.790859
Q0065	AI4	3.32048	3.52732	3.98277	3.7866	3.8953	3.82477	3.43962	3.21257		0.00149473	0.000265815		0.662281	0.259276		-0.455679	-0.612199
YIL052C	RPL34B	8.22646	8.35848	7.99853	7.91648	7.32283	8.02464	6.91085	6.94287		0.00151601	0.000269315		-0.227926	-0.441999		-0.411977	-1.08177
YOL073C	DSC2	4.09677	4.53045	4.3799	4.35896	5.27128	5.7879	6.34056	6.1266		0.985853	0.000276231		0.28313	-0.171487		1.06929	0.338699
YKR001C	VPS1	6.3637	6.1981	6.14486	6.11686	5.83441	5.97957	5.44493	5.38336		0.246621	0.00027883		-0.218835	-0.0812375		-0.389476	-0.596209
YBR031W	RPL4A	6.56148	6.33378	6.86827	6.97762	6.67271	7.08884	6.30834	6.32535		0.000588998	0.000285699		0.306788	0.643842		-0.364369	-0.763491
YGR185C	TYS1	6.82388	6.81711	6.8358	6.81083	6.99333	6.98584	6.50351	6.53013		0.905844	0.000288865		0.0119211	-0.00628291		-0.489827	-0.455709
YML100W-A	YML100W-A	1.18269	1.43296	0.400538	-0.395929	3.69377	3.74953	5.09635	4.8802		0.54473	0.00028961		-0.782154	-1.82889		1.40258	1.13066
YNR018W	RCF2	6.26285	6.15015	5.79779	5.90376	6.32463	6.2724	6.87406	6.82528		0.00540967	0.000291496		-0.465055	-0.246392		0.549429	0.55288
YJL088W	ARG3	7.29471	7.29655	7.60703	7.50279	6.49617	6.45105	6.0321	5.84699		0.117809	0.000292875		0.312322	0.206243		-0.464074	-0.604052
YDL020C	RPN4	6.55305	6.51207	6.68874	6.74913	7.21072	7.33441	7.72055	7.71966		0.418807	0.000293125		0.135687	0.237063		0.509832	0.385255
YER056C-A	RPL34A	8.38672	8.43404	8.25687	8.14303	7.35456	7.71239	6.87873	6.97842		0.0596771	0.00029692		-0.129856	-0.291018		-0.475833	-0.733965
YKR003W	OSH6	6.30579	6.49233	6.30488	6.32499	6.20477	6.43729	5.81711	5.8009		0.538224	0.000298266		-0.000912117	-0.167343		-0.387655	-0.636394
YBL054W	TOD6	3.2765	3.37434	3.77294	4.01703	4.22188	4.16752	4.7761	4.8802		0.0093529	0.000298933		0.496445	0.642687		0.554227	0.712677
YFL036W	RPO41	5.67469	5.52576	5.63865	5.74228	5.2114	5.24527	4.75221	4.76977		0.884998	0.000303666		-0.0360335	0.21652		-0.459188	-0.475496
YOR137C	SIA1	3.0018	2.65535	3.38128	3.32625	3.88166	3.81147	4.50462	4.46663		0.033737	0.000306758		0.379481	0.670898		0.622956	0.655156
YIL114C	POR2	5.66676	5.75355	5.81967	5.8071	6.18031	6.15947	6.61456	6.85025		0.859765	0.000308515		0.152912	0.0535462		0.434256	0.690782
YPL232W	SSO1	5.47962	5.10936	5.35509	5.23955	5.74578	5.90545	6.3572	6.40173		0.94016	0.000310025		-0.124532	0.13019		0.611425	0.496286
YMR076C	PDS5	2.68257	2.55582	2.55582	2.41954	2.24184	2.53107	1.75702	1.23266		0.588438	0.00031938		-0.126757	-0.136277		-0.484817	-1.29841
YGL092W	NUP145	5.57289	5.4941	5.6522	5.56925	5.26228	5.2555	4.7939	4.78816		0.905336	0.000322339		0.07931	0.0751525		-0.468387	-0.467337
YOL085W-A	YOL085W-A	1.59455	1.43296	2.39506	1.18903	3.61589	3.50208	4.69209	5.14934		0.853084	0.000323257		0.800514	-0.243926		1.07621	1.64726
YDR231C	COX20	4.70321	4.7137	4.38267	4.31325	5.05875	5.36597	5.86864	5.91576		0.102616	0.000324147		-0.320544	-0.40045		0.809888	0.549787
YPL036W	PMA2	4.85997	4.67751	4.55766	4.49953	5.21645	5.14649	5.72792	5.63865		0.0548351	0.000326191		-0.302314	-0.177981		0.511466	0.492161
YOR198C	BFR1	7.21043	7.16098	7.17672	7.1035	7.10486	7.50335	6.73877	6.81596		0.707029	0.000327904		-0.0337061	-0.057483		-0.366093	-0.687389
YOL127W	RPL25	9.59201	9.60727	9.88792	10.0362	9.17523	8.98428	8.68335	8.45816		0.00728119	0.000329085		0.295913	0.428913		-0.49188	-0.526116
YGR146C	ECL1	6.30323	6.30761	6.62498	6.72083	6.80697	6.76288	7.32319	7.28086		0.0205294	0.000332654		0.321745	0.413215		0.516221	0.517983
YCR068W	ATG15	6.40361	6.24679	6.20516	6.36877	6.74012	6.86962	7.28068	7.24764		0.788426	0.000333527		-0.198451	0.12198		0.54056	0.378018
YML106W	URA5	8.35063	8.38478	8.45372	8.30898	7.50684	7.62593	7.17313	6.90364		0.952055	0.000333527		0.103093	-0.0758077		-0.333716	-0.722287
YHR006W	STP2	4.37086	4.12019	4.51349	4.47703	4.68313	4.75435	5.18785	5.44029		0.373788	0.000334547		0.142629	0.356844		0.504712	0.685935
YFR040W	SAP155	5.05007	4.9397	5.23573	5.16832	4.81865	4.86987	4.31397	4.35755		0.310619	0.000338141		0.185661	0.228624		-0.504675	-0.512319
YGL035C	MIG1	4.26529	4.24413	4.47249	4.47184	4.44824	4.49185	3.73985	3.88264		0.451621	0.000338896		0.207201	0.227712		-0.708392	-0.60921
YGR082W	TOM20	7.40207	7.56636	7.67483	7.355	6.68285	6.63981	6.17313	5.98891		0.990058	0.000339069		0.272754	-0.21136		-0.509727	-0.650899
YOR036W	PEP12	3.03034	3.65306	3.72792	3.68594	4.45352	4.63633	5.20124	5.24184		0.578762	0.000343718		0.697584	0.0328801		0.747724	0.605506
YCL005W	LDB16	4.79546	4.48156	4.96625	4.40463	5.2902	5.32553	5.92339	5.8885		0.970821	0.000351934		0.170791	-0.0769266		0.633184	0.562969
YBR015C	MNN2	5.84599	5.95233	6.0063	5.98937	5.46401	5.35826	4.82477	4.90833		0.84119	0.000353324		0.160306	0.0370325		-0.639247	-0.449923
YHR064C	SSZ1	7.08821	7.12391	7.21539	7.28799	7.05376	6.88521	6.55704	6.44791		0.589582	0.000358128		0.127182	0.164075		-0.496721	-0.437299
YGR224W	AZR1	0.286881	0.545968	0.0840643	0.678072	0.925999	0.704872	1.70487	1.90689		0.962992	0.000358128		-0.202817	0.132104		0.778873	1.20202
YIL049W	DFG10	3.66334	3.42492	4.09592	3.64616	3.98185	4.07211	4.77663	4.82171		0.48506	0.000359914		0.43258	0.221241		0.794778	0.749604
YLL025W	PAU17	11.6643	11.4805	12.067	12.2921	13.8131	13.6227	14.3162	14.1958		2.00388e-06	0.000363802		0.402726	0.811619		0.503058	0.57312
YMR262W	YMR262W	2.87774	2.74416	2.33914	2.81558	2.43029	3	3.86888	3.63923		0.683959	0.000364093		-0.538607	0.0714143		1.4386	0.639232
YDL037C	BSC1	5.66676	5.30706	5.61176	5.71507	6.28633	6.30579	6.77887	6.81711		0.675654	0.000367468		-0.054994	0.408006		0.492539	0.511323
YKL165C	MCD4	6.50192	6.22052	6.10308	6.21121	7.08916	6.81941	6.46041	6.45236		0.164809	0.000373404		-0.398839	-0.00931651		-0.628744	-0.367048
YDR023W	SES1	6.8695	6.92374	6.848	6.84235	6.16249	6.19554	5.75409	5.59694		0.671843	0.000373404		-0.0215044	-0.0813931		-0.408406	-0.598609
YNL065W	AQR1	6.19751	6.22284	6.08108	6.19594	6.46809	6.71301	6.09487	6.12701		0.598285	0.000391405		-0.116428	-0.0269051		-0.373225	-0.585994
YKL103C	APE1	5.94439	5.87332	6.0974	6.15056	6.06458	6.10664	5.58496	5.61559		0.283837	0.000391517		0.15301	0.277239		-0.479619	-0.491049
YOR213C	SAS5	5.6311	5.75969	5.80478	5.72247	6.18982	6.13031	6.64285	6.78424		0.964219	0.000393296		0.173672	-0.0372225		0.453021	0.653929
YIL100W	YIL100W	2.18587	1.69599	2.66221	1.8679	2.80116	2.22959	4.0009	3.90593		0.792437	0.000393598		0.476339	0.171903		1.19974	1.67634
YJR105W	ADO1	8.17208	8.24797	8.0486	8.07377	8.60114	8.37239	8.99203	8.98576		0.210006	0.000407059		-0.123482	-0.174208		0.390893	0.61337
YMR199W	CLN1	4.43162	4.59872	4.48929	4.58135	3.38267	3.72574	2.72465	2.77821		0.962819	0.000421452		0.0576631	-0.0173713		-0.658017	-0.947533
Q0045	COX1	4.73281	4.77979	5.41886	5.4121	5.07168	5.30524	4.75275	4.75168		2.20685e-11	0.000422653		0.686053	0.632319		-0.318928	-0.553563
YNL084C	END3	4.33914	4.34837	4.30378	4.27798	4.31397	4.44824	5.11686	4.96532		0.80922	0.000424517		-0.0353566	-0.0703893		0.802892	0.517082
GTK30G03470	GTK30G03470	4.18507	4.08151	4.16269	3.94579	3.38543	4.0072	2.12102	2.97085		0.76487	0.000447811		-0.0223802	-0.135715		-1.26442	-1.03634
YFR032C-A	RPL29	8.27342	8.66192	8.68853	8.23726	7.78647	7.66356	7.19604	6.91421		0.952055	0.00045235		0.415107	-0.424663		-0.590429	-0.749352
YHR048W	YHK8	5.71754	5.80529	5.99661	5.88044	6.71108	6.60896	7.08449	7.19633		0.482852	0.000456392		0.279075	0.0751482		0.373408	0.587375
YJL165C	HAL5	3.60526	3.65421	3.61941	3.35191	4.54905	5.0993	5.4489	5.5043		0.513245	0.000458427		0.0141557	-0.302295		0.899848	0.405007
YML116W	ATR1	4.59156	4.58796	4.60526	4.37434	4.96162	4.88411	5.42425	5.52356		0.623252	0.000458427		0.0136975	-0.213621		0.462627	0.639453
YDL070W	BDF2	3.99548	3.853	4.0009	3.96347	5.04396	5.22072	5.68004	5.61706		0.985609	0.000458766		0.00541688	0.110477		0.636086	0.396346
YLR183C	TOS4	3.66676	3.60881	3.36317	3.43029	2.88753	2.98185	1.51602	2.19849		0.283106	0.000473832		-0.303586	-0.178524		-1.37151	-0.783358
YDL145C	COP1	7.61316	7.39266	7.63996	7.61794	7.75482	7.85112	7.38595	7.38957		0.739157	0.000487694		0.0267924	0.225284		-0.368872	-0.461558
YDL233W	MFG1	3.22497	3.10098	3.24945	3.17792	3.79077	3.9991	4.47119	4.47897		0.985853	0.000500549		0.024479	0.0769401		0.680415	0.479874
YBR079C	RPG1	5.86369	5.65907	5.68566	5.72765	5.56041	5.49506	5.05615	5.05094		0.69384	0.000501558		-0.178031	0.0685799		-0.504259	-0.444119
YDR150W	NUM1	3.69377	3.42223	3.60999	3.49057	3.77821	3.85	3.35896	3.36597		0.889041	0.000505398		-0.0837744	0.0683371		-0.41925	-0.484027
YJL189W	RPL39	8.92484	9.09645	9.44506	9.44799	8.43404	9.20146	8.14649	7.95076		0.00134468	0.000519259		0.520214	0.351541		-0.287552	-1.2507
YOL139C	CDC33	7.39652	7.39137	7.31786	7.21004	6.5157	6.7494	6.07339	6.10077		0.300838	0.000519259		-0.0786544	-0.181334		-0.442308	-0.648633
YGL142C	GPI10	4.64155	4.72465	4.88362	4.77294	5.44526	5.45943	5.98482	5.90135		0.68079	0.000519259		0.242075	0.0482911		0.539554	0.441918
YPL224C	MMT2	4.42089	4.51979	4.40871	4.51349	4.92315	4.87135	5.45516	5.43796		0.897562	0.000519259		-0.0121747	-0.00630274		0.532014	0.566609
YNR051C	BRE5	5.97774	5.77584	5.99594	5.73769	6.08598	5.97797	5.57259	5.49474		0.911016	0.000519259		0.0181989	-0.0381539		-0.51339	-0.483231
YLR358C	YLR358C	-0.217591	-0.395929	-0.415037	-0.810966	2.74201	2.34483	3.59216	3.94486		0.921629	0.000519259		-0.197446	-0.415037		0.850152	1.60003
YER125W	RSP5	7.26819	7.26266	7.30214	7.25616	6.87307	7.01703	6.50922	6.53683		0.938659	0.000519259		0.0339452	-0.00649715		-0.363854	-0.480201
GTK30N00600	GTK30N00600	4.5373	4.46009	4.32193	5.10308	4.75382	4.31615	3.79597	3.74739		0.644806	0.000522597		-0.215368	0.642991		-0.957844	-0.568758
YPR173C	VPS4	4.53294	4.47768	4.64097	4.48478	5.1469	5.2604	5.68678	5.79597		0.972673	0.000527998		0.108028	0.0071053		0.539881	0.535573
YDR323C	PEP7	2.90497	3.02857	3.35473	3.20006	3.24184	3.66221	4.16912	4.21723		0.405936	0.000531886		0.449769	0.171496		0.927283	0.555025
YIL112W	HOS4	2.80323	2.90689	2.91456	2.61117	2.99639	2.93546	3.59096	3.58736		0.751919	0.000532527		0.111337	-0.295718		0.594572	0.651905
YML095C	RAD10	3.06867	3.44361	3.57894	3.58496	4.24945	4.17871	5.15218	4.85599		0.649671	0.000548502		0.510268	0.141356		0.902738	0.677275
YHR065C	RRP3	2.19219	2.1177	2.05311	2.0072	2.10434	2.45418	3.15866	2.9222		0.689876	0.000562554		-0.139083	-0.1105		1.05432	0.468022
YLR272C	YCS4	2.94486	2.95606	2.85997	2.854	2.75061	2.81558	2.06005	2.11103		0.644794	0.000563619		-0.0848889	-0.102061		-0.690559	-0.704544
YEL055C	POL5	5.35614	5.09508	5.30524	5.27873	5.06437	4.95	4.55336	4.45681		0.964811	0.000563677		-0.0509028	0.183648		-0.511005	-0.493196
YBR060C	ORC2	3.75275	3.849	4.03562	3.7866	4.09845	4.51286	4.98732	4.88362		0.853084	0.000564932		0.282875	-0.0624021		0.888868	0.370762
YPL256C	CLN2	5.05788	5.24907	5.45286	5.25134	3.85997	4.00988	3.29131	3.17473		0.485114	0.000575037		0.394976	0.00227435		-0.568661	-0.835159
YPL254W	HFI1	4.04089	4.26828	4.19692	4.06609	4.07125	4.20163	3.52105	3.36457		0.884116	0.00057646		0.156029	-0.202195		-0.550197	-0.837061
YNL235C	YNL235C	-0.415037	0.731183	-1.64386	-1.4344	1.0072	0.0703893	2.49057	2.82171		0.359023	0.000584123		-1.22882	-2.16559		1.48337	2.75132
YLR287C-A	RPS30A	11.6738	11.6708	11.8847	11.8253	11.0403	11.4203	10.756	10.7486		0.339669	0.000586931		0.210854	0.154467		-0.284304	-0.671713
YGL234W	ADE5,7	6.96371	6.92801	6.91385	6.92434	7.19515	7.43804	7.7224	7.83188		0.784737	0.000587847		-0.0498585	-0.00367747		0.527247	0.393834
YNL073W	MSK1	3.18745	3.41954	3.53356	3.64501	4.07382	4.05658	4.76182	4.58856		0.435933	0.000606278		0.346112	0.225471		0.687997	0.531981
YOR104W	PIN2	3.27352	2.72028	2.9241	2.60644	3.87676	4.16511	4.83845	4.69766		0.69369	0.000606278		-0.349416	-0.113836		0.961685	0.532555
YOR269W	PAC1	3.50843	3.43563	3.84197	3.48671	3.53854	3.77716	4.32625	4.33199		0.647684	0.000616808		0.333544	0.0510858		0.787712	0.554835
YMR221C	FMP42	3.46597	3.44493	3.851	3.74846	4.99458	5.15137	5.55551	5.65907		0.1817	0.000619809		0.385025	0.303529		0.56093	0.507696
YDR342C	HXT7	10.0277	9.86975	9.91154	9.82509	9.33715	9.17463	8.87526	8.68201		0.48476	0.000626909		-0.116129	-0.0446621		-0.461896	-0.492615
YLL024C	SSA2	8.35045	8.25786	8.58613	8.51968	10.092	10.0484	10.4891	10.5529		0.105745	0.000637047		0.235674	0.261816		0.397138	0.504529
YDR500C	RPL37B	7.67497	7.4489	7.77156	7.61714	7.18448	7.26144	6.7666	6.53543		0.736981	0.000639739		0.0965865	0.168236		-0.417884	-0.726006
YNL087W	TCB2	5.58406	5.47346	5.55643	5.47314	5.47151	5.58526	5.13955	5.01659		0.855133	0.000651073		-0.0276311	-0.000324748		-0.331961	-0.568678
YDL171C	GLT1	7.90755	7.65292	7.88393	7.8902	7.633	7.51767	7.14924	7.13679		0.83389	0.000695695		-0.0236254	0.237287		-0.483756	-0.380883
YKL054C	DEF1	5.9404	5.8387	6.08937	5.99865	5.4353	5.97751	5.16511	5.06393		0.56572	0.00070291		0.148969	0.159947		-0.270187	-0.913575
YBR222C	PCS60	5.24336	5.16148	5.63314	5.6011	6.04898	6.2937	6.66107	6.63836		0.00178273	0.000709379		0.389776	0.439618		0.612088	0.344662
YJL198W	PHO90	6.48655	6.3386	5.82299	5.85898	7.07692	7.11374	7.48519	7.53566		6.89035e-09	0.000709748		-0.663568	-0.479627		0.408263	0.421922
YPL081W	RPS9A	8.12758	8.1443	8.20394	8.114	7.28114	7.74678	6.85947	7.02181		0.976694	0.000718759		0.0763535	-0.0302988		-0.421669	-0.72497
YEL022W	GEA2	4.20867	3.84298	4	4.14731	4.13093	4.01614	3.5373	3.56803		0.998939	0.000724204		-0.208673	0.304328		-0.593635	-0.448108
YOR384W	FRE5	1.30451	1.26903	0.356144	-0.514573	1.15704	1.1635	2.63459	1.9486		0.00279862	0.000756215		-0.948367	-1.78361		1.47755	0.785102
YJL174W	KRE9	7.12381	7.11925	7.03914	6.82043	7.70072	7.76785	8.13725	8.19756		0.137696	0.000772372		-0.0846726	-0.298818		0.43653	0.429707
YDR310C	SUM1	4.51223	4.1914	4.40122	4.24108	4.21723	4.12928	3.72247	3.52356		0.839994	0.000772372		-0.111006	0.0496727		-0.494765	-0.605721
YPL089C	RLM1	3.43162	3.49057	3.81352	3.80839	4.19535	4.43962	4.88557	4.86394		0.121632	0.000784256		0.381902	0.317815		0.690227	0.424315
YNL138W-A	YSF3	3.21257	2.82579	3.37573	3.54102	3.7148	4.01257	4.66221	4.86394		0.52779	0.000786263		0.163165	0.715234		0.94741	0.85137
YDR186C	YDR186C	7.71459	7.62103	7.84699	7.98601	7.75976	7.58736	7.26435	7.21121		0.159927	0.000795461		0.132406	0.364986		-0.495406	-0.376158
YBL004W	UTP20	5.64875	5.50653	5.75756	5.77979	5.3194	5.26679	4.86888	4.89045		0.387449	0.000795461		0.108804	0.273259		-0.450517	-0.37634
YLR346C	CIS1	6.21276	6.38336	6.13996	6.24926	6.9397	7.73071	8.15588	8.11899		0.635737	0.000800087		-0.0728033	-0.134103		1.21618	0.388285
YKL096W-A	CWP2	4.90689	5.32625	5.91337	5.79753	4.10014	4.53854	5.53699	5.13586		0.00500491	0.000802758		1.00648	0.471282		1.43685	0.597325
YGR200C	ELP2	4.60585	4.4363	4.67976	4.56682	4.07468	4.03914	3.38819	3.52982		0.8374	0.000819712		0.0739117	0.13052		-0.686487	-0.509317
YNL030W	HHF2	7.58826	7.87406	7.51404	7.31343	6.97166	7.3087	6.55351	6.51144		0.0342115	0.000823693		-0.0742216	-0.560632		-0.418144	-0.797267
YGL148W	ARO2	6.73227	6.87036	6.72356	6.6953	6.62	6.70791	6.1643	6.2466		0.486228	0.000850575		-0.00871064	-0.175067		-0.455696	-0.461313
YPR074C	TKL1	9.64395	9.49673	9.43798	9.44768	9.17338	9.25934	8.81356	8.81385		0.246621	0.000864215		-0.205965	-0.0490515		-0.359821	-0.445498
YIL121W	QDR2	5.79025	5.77847	5.75756	5.75195	6.13812	6.21781	6.60896	6.64111		0.783559	0.000873781		-0.032694	-0.0265258		0.470839	0.4233
YAL020C	ATS1	3.51223	3.36597	3.99458	3.29866	4.08236	3.69377	4.71918	4.60881		0.699838	0.0008744		0.482353	-0.0673141		0.636821	0.915044
YNL132W	KRE33	5.07082	4.99367	5.0505	5.08321	4.57168	4.58616	4.03914	4.12516		0.985853	0.000887794		-0.0203169	0.089539		-0.532538	-0.461009
YDR507C	GIN4	3.37851	3.16672	3.55704	3.37156	3.04789	3.19692	2.60881	2.31615		0.552505	0.00089735		0.178531	0.204843		-0.439078	-0.880776
YGR181W	TIM13	6.45236	6.4522	6.53185	6.66775	6.17113	6.1035	5.25512	5.55551		0.749383	0.00091383		0.0794845	0.21555		-0.916004	-0.547988
YGR162W	TIF4631	6.0054	5.87603	5.99345	5.89579	5.41481	5.72247	5.15704	4.98504		0.916765	0.00091877		-0.0119521	0.0197616		-0.257768	-0.737421
YDL131W	LYS21	5.46107	5.59634	5.83238	5.99232	5.51128	5.51096	5.05702	4.91409		0.0190309	0.000920847		0.371314	0.395976		-0.454261	-0.596876
YGR037C	ACB1	9.04947	9.33139	8.9855	8.81791	9.04428	8.82518	8.49685	8.37764		0.0364264	0.000922374		-0.063967	-0.513476		-0.547431	-0.447537
YER111C	SWI4	3.56194	3.49442	3.90785	4.01257	3.22651	3.65306	2.80735	2.76553		0.00611217	0.000935221		0.345915	0.518153		-0.419154	-0.887525
YJR061W	YJR061W	3.93074	3.66448	3.85	3.67582	4.43229	4.6017	4.98459	5.03386		0.8578	0.000936233		-0.0807381	0.0113331		0.552298	0.432167
YOR027W	STI1	5.85624	5.84323	6.1058	6.00248	7.51167	8.1177	8.46021	8.42886		0.306379	0.000940038		0.249565	0.159247		0.948537	0.311168
YNL188W	KAR1	2.93923	2.88557	3.19377	3.17951	2.35614	3.11936	1.57531	1.50589		0.562016	0.00095471		0.254545	0.293937		-0.780831	-1.61347
YDR385W	EFT2	6.24298	5.92148	6.00495	6.32589	5.50176	5.41414	5.0063	4.98185		0.930233	0.000975566		-0.238033	0.404406		-0.49546	-0.432283
YCR093W	CDC39	5.43962	5.29866	5.51444	5.50875	5.26791	5.15987	4.81916	4.75061		0.635479	0.00098005		0.0748148	0.210087		-0.448753	-0.409265
YDR123C	INO2	5.06307	5.08236	4.89288	5.03826	5.66448	5.88679	6.35949	6.2466		0.583516	0.000992708		-0.170195	-0.0441014		0.695003	0.359804
YLR137W	RKM5	2.31034	2.75702	2.26903	1.75275	3.20163	2.85599	3.95884	3.79077		0.301646	0.00099387		-0.041307	-1.00427		0.757209	0.934782
YBR028C	YPK3	3.9644	3.95047	4.20006	4.38543	3.45154	3.45812	2.80323	2.58736		0.167279	0.00100093		0.235666	0.434963		-0.648314	-0.870754
YER075C	PTP3	3.5509	3.17951	3.82579	3.86987	3.45681	3.26003	2.6893	2.70487		0.0143508	0.00100959		0.274885	0.69036		-0.767507	-0.555154
Q0085	ATP6	7.27789	7.08332	7.86753	8.22333	7.59395	7.42853	7.1177	6.93864		6.97246e-09	0.00102907		0.589634	1.14001		-0.476256	-0.489889
YPL016W	SWI1	2.90689	3.04614	3.32912	3.44758	3.41414	3.24945	2.63459	2.80941		0.0278784	0.00105442		0.422233	0.401437		-0.779542	-0.440031
YBL102W	SFT2	5.53761	5.73227	5.66732	5.52042	6.01547	5.93003	6.51096	6.5051		0.824419	0.00105442		0.129718	-0.211847		0.495491	0.575069
YIL006W	YIA6	4.5741	4.35544	4.6427	4.52669	4.93734	5.11603	5.67497	5.49217		0.836695	0.00106149		0.0686001	0.171256		0.737625	0.376142
YBL051C	PIN4	5.42593	5.37156	5.73525	5.63749	5.16068	5.1815	4.78607	4.47249		0.0653995	0.00106408		0.309322	0.265935		-0.374605	-0.709012
YOL052C	SPE2	5.73118	5.95838	6.16752	5.90352	6.02303	6.04089	6.48527	6.50795		0.54473	0.00107521		0.436335	-0.0548583		0.462232	0.467061
YMR307W	GAS1	9.21237	9.07908	8.92606	8.93286	8.21675	8.11197	7.81224	7.68243		0.0299528	0.00109066		-0.286316	-0.14622		-0.404504	-0.429537
YJL152W	YJL152W	4.00899	5.22766	3.33914	3.09255	4.54659	4.87381	5.49121	5.52388		0.00173112	0.00112268		-0.669851	-2.13512		0.944626	0.650062
YLR190W	MMR1	5.56133	5.57713	5.56894	5.56742	5.68622	5.59485	5.19101	5.08236		0.897562	0.0011276		0.00761801	-0.0097029		-0.495211	-0.512485
YCR012W	PGK1	12.1503	12.022	11.8555	11.8811	11.6956	11.6276	11.2017	11.2663		0.0132736	0.00114866		-0.294762	-0.140947		-0.493886	-0.361338
YIL009W	FAA3	5.49697	5.33664	5.35014	5.38509	5.12309	5.16511	4.74362	4.51791		0.714746	0.00116959		-0.14683	0.0484454		-0.379464	-0.647202
YDL168W	SFA1	5.13832	5.14893	5.04745	5.17233	5.76075	5.60999	6.18031	6.2116		0.821997	0.00118028		-0.0908719	0.0233934		0.419554	0.601605
YNL220W	ADE12	4.92647	4.98868	4.76713	4.57531	4.62819	4.8846	5.25927	5.3837		0.0585823	0.00119615		-0.159349	-0.413372		0.631082	0.499106
YJL172W	CPS1	6.46499	6.3025	6.2604	6.43729	7.14914	6.94064	7.45902	7.57607		0.804224	0.00119792		-0.204593	0.134792		0.309884	0.635432
YJR070C	LIA1	6.45763	6.72724	6.58916	6.26416	5.86864	5.88411	5.37712	5.36702		0.398333	0.0012679		0.131537	-0.463079		-0.491514	-0.517088
YGR148C	RPL24B	8.89494	9.1812	9.03826	8.88743	8.25682	8.87596	7.97854	8.00579		0.648305	0.00126979		0.143322	-0.293768		-0.278283	-0.870171
YBL096C	YBL096C	3.38128	3.0635	2.66676	2.76553	3.86295	3.54967	4.65249	4.89093		0.487129	0.00127104		-0.714527	-0.297968		0.789539	1.34126
YOR197W	MCA1	5.01078	5.19022	5.17473	5.16108	5.26828	5.38819	5.7703	5.77321		0.964811	0.00128951		0.163946	-0.0291383		0.502016	0.385016
YJL055W	YJL055W	6.03672	6.08874	6.33771	5.91265	6.07916	6.43363	5.73037	5.68454		0.937871	0.00129463		0.300988	-0.176085		-0.348797	-0.749089
YKR088C	TVP38	6.10308	6.1536	6.11333	5.8902	6.07703	6.0387	6.54797	6.51838		0.433487	0.00132057		0.0102475	-0.263399		0.470945	0.479678
YER155C	BEM2	5.7498	5.49025	5.54751	5.57137	5.62439	5.47184	5.14568	5.11228		0.676664	0.00133082		-0.202291	0.0811242		-0.478716	-0.359555
GTK30K00180	GTK30K00180	2.88362	2.9279	3.14731	3.04264	3.85699	4.32048	4.81865	4.79181		0.820922	0.00133858		0.263686	0.114748		0.96166	0.471329
YAR020C	PAU7	5.2791	5.41886	4.69042	5.13134	7.62432	7.27891	8.09703	7.95913		0.109366	0.0013739		-0.588683	-0.287522		0.472711	0.680219
YML052W	SUR7	5.5741	5.49697	5.55029	5.40361	5.05961	5.50653	4.51096	4.7301		0.749616	0.00144713		-0.0238165	-0.093365		-0.548653	-0.776429
YBL025W	RRN10	3.55582	3.7126	3.91073	3.77189	3.86493	4.13422	4.774	4.94673		0.832639	0.00147037		0.354917	0.0592898		0.909067	0.81251
YGL192W	IME4	2.21412	2.96347	1.35614	0.516015	1.9486	2.82985	3.25096	3.50208		2.09783e-05	0.00150589		-0.857981	-2.44746		1.30236	0.672226
YJR016C	ILV3	7.82763	7.87123	7.81948	7.79967	7.43054	7.41971	7.02901	7.04439		0.709406	0.00150704		-0.00815192	-0.0715574		-0.401525	-0.375313
YLL035W	GRC3	4.2854	4.35614	4.6017	4.35262	4.77716	4.8089	5.3875	5.20633		0.664604	0.00154272		0.316294	-0.00352651		0.610344	0.397431
YDL040C	NAT1	5.19574	5.20006	5.32733	5.31107	5.04045	5.20398	4.70764	4.6153		0.729807	0.00155706		0.131587	0.111002		-0.332819	-0.588686
YOR196C	LIP5	4.82375	4.89433	4.74362	4.80993	4.80529	4.75542	5.30998	5.32337		0.640407	0.00156285		-0.0801267	-0.0844039		0.504684	0.567948
YNR013C	PHO91	4.81044	4.59156	4.96394	4.81967	5.33664	5.18349	5.72329	5.73308		0.465117	0.00156913		0.153493	0.228108		0.386645	0.549597
YGL226C-A	OST5	6.20965	6.29701	6.63401	6.74349	6.29186	6.52152	5.70349	5.76075		0.0466761	0.00157838		0.424364	0.44648		-0.588373	-0.760769
YLR315W	NKP2	5.24717	5.24413	5.38716	5.33056	6.18646	5.99955	6.65735	6.66235		0.877694	0.00162447		0.139988	0.0864325		0.470893	0.662799
YHR050W	SMF2	5.86888	5.66903	5.86022	5.71205	6.49201	6.6686	7.00068	7.00619		0.968793	0.0016245		-0.00866635	0.0430187		0.508663	0.337584
YDR247W	VHS1	3.66221	3.49697	4.21723	3.70708	4.18666	4.42895	4.80323	5.01167		0.206432	0.00163387		0.555025	0.210109		0.616568	0.582728
YDR250C	YDR250C	-0.761213	1.07039	-0.971431	0.831877	3.08746	4.0018	4.60407	5.04396		0.916765	0.00166356		-0.210218	-0.238512		1.51661	1.04215
YPL088W	YPL088W	5.66334	5.6659	5.77821	5.63343	6.27389	6.51964	6.80581	6.94977		0.985853	0.00167391		0.114864	-0.0324731		0.53192	0.430132
YKR015C	YKR015C	0.83996	1.23266	-0.286304	-1.08927	0.250962	0.411426	1.73118	1.4489		0.00178273	0.00168204		-1.12626	-2.32193		1.48022	1.03747
YDL015C	TSC13	6.73877	6.62132	6.56864	6.34749	6.89385	6.55566	7.25635	7.26604		0.0964561	0.00169141		-0.170128	-0.273831		0.362503	0.710374
YOR142W	LSC1	7.23735	7.19397	7.39232	7.44352	6.51665	6.7385	6.22709	6.09571		0.337885	0.00172481		0.154964	0.249555		-0.289559	-0.642784
YHR104W	GRE3	5.40497	5.30998	5.51001	5.37712	6.39506	6.42593	6.84987	6.86047		0.897098	0.00174043		0.105041	0.0671473		0.454811	0.434537
YPL158C	AIM44	2.54102	2.47768	2.72465	2.63227	2.90304	3.23879	2.25701	2.43029		0.762753	0.00175167		0.183631	0.154591		-0.646028	-0.808502
YBR280C	SAF1	2.65764	2.58496	2.73552	2.80941	3.60881	3.44228	4.13011	4.14078		0.837232	0.00176232		0.0778822	0.224452		0.521298	0.698499
YML085C	TUB1	6.30342	6.4822	6.17353	6.24736	5.77689	5.80916	5.34802	5.37921		0.165252	0.00177936		-0.129888	-0.234845		-0.428874	-0.429952
YGL007C-A	YGL007C-A	3.20945	1.72247	3.68706	3.70155	4.19692	3.11603	5.41988	5.27873		0.428155	0.00179638		0.477607	1.97908		1.22295	2.1627
YGL253W	HXK2	8.79841	8.71036	8.70428	8.69209	8.1468	7.90683	7.66718	7.47476		0.613753	0.00180314		-0.0941229	-0.0182664		-0.479615	-0.43207
YOR361C	PRT1	6.43946	6.31288	6.28522	6.25001	5.71122	5.87774	5.3726	5.35544		0.405936	0.00180498		-0.15424	-0.0628688		-0.338616	-0.522305
YHL021C	AIM17	5.10559	5.0781	5.33949	5.3875	5.34589	4.86443	5.71012	5.79312		0.157809	0.00181009		0.233899	0.309403		0.364225	0.928682
YOR382W	FIT2	2.93923	1.89918	2.27798	2.18587	1.1375	2.19219	4.97911	2.47768		0.81673	0.0018269		-0.661242	0.286691		3.84161	0.285483
YKR074W	AIM29	5.42593	5.54257	5.45976	5.56438	5.19259	5.27314	4.51286	4.54659		0.985853	0.00182754		0.0338303	0.0218106		-0.67973	-0.726557
YJL143W	TIM17	7.49081	7.65098	7.3386	6.87774	7.38836	7.08353	7.69391	7.87018		0.00405126	0.00184054		-0.152208	-0.773236		0.305543	0.786647
YDR232W	HEM1	8.14287	8.03886	8.10805	8.14149	7.17592	7.59537	7.8666	7.88679		0.985853	0.00184334		-0.034819	0.10263		0.690675	0.291425
YBR106W	PHO88	9.40867	9.48091	9.17687	9.12915	8.80458	9.09708	8.56586	8.49949		0.00265317	0.00188673		-0.231798	-0.351757		-0.238719	-0.597597
YMR205C	PFK2	9.67997	9.46746	9.50577	9.5611	9.24363	9.35182	8.90457	8.9227		0.724071	0.00195001		-0.174201	0.0936341		-0.339052	-0.429119
YPL085W	SEC16	4.46336	4.22419	4.3505	4.33056	4.31615	4.47444	4.01792	3.9222		0.897098	0.00195566		-0.112864	0.106364		-0.298224	-0.552238
YEL001C	IRC22	6.84436	6.57698	7.06523	7.02436	7.11051	7.10287	6.71534	6.60006		0.0560358	0.00203512		0.220867	0.447388		-0.395165	-0.502806
YJL138C	TIF2	6.79233	6.67356	6.88777	6.89554	6.37747	6.27966	5.93216	5.80839		0.558194	0.00203512		0.0954341	0.221989		-0.445315	-0.471272
YNL162W	RPL42A	8.19274	8.21757	8.08672	8.04887	7.26416	8.09186	6.98185	6.98242		0.258906	0.00204393		-0.106017	-0.168702		-0.282308	-1.10944
YHR082C	KSP1	5.06134	5.03518	5.19889	5.24527	6.399	6.5575	6.87885	6.86777		0.464874	0.00204569		0.137543	0.210083		0.479848	0.310271
YDL179W	PCL9	3.3505	3.43563	3.29278	3.47638	3.29719	3.32912	2.5008	2.24793		0.952055	0.00207693		-0.0577155	0.0407531		-0.796389	-1.0812
YKR042W	UTH1	8.75866	8.51444	8.61412	8.53858	8.63238	8.4227	8.95649	9.00896		0.642714	0.00207732		-0.144535	0.024139		0.324115	0.586265
YKR079C	TRZ1	3.61824	3.42223	3.84398	3.73985	3.37434	3.35755	2.79701	2.6893		0.275086	0.00209895		0.225745	0.317615		-0.577331	-0.668253
YFR052C-A	YFR052C-A	4.80116	4.49249	5.17712	4.91217	4.05224	4.37156	3.32912	2.53107		0.380945	0.00218223		0.375962	0.419677		-0.723118	-1.84049
YMR072W	ABF2	6.58406	6.68594	6.88935	6.58135	6.15927	6.05289	5.67356	5.30816		0.847786	0.00219661		0.305291	-0.104589		-0.485709	-0.744737
YBR177C	EHT1	3.4019	3.0635	3.43962	3.40735	3.68257	3.70155	4.48864	4.19061		0.748744	0.00219911		0.0377197	0.34385		0.80607	0.489066
GTK30N03910	GTK30N03910	0.879706	1.30451	1.4489	1.73552	2.62059	2.59694	3.45154	3.55949		0.652749	0.00220681		0.569195	0.431011		0.830954	0.962557
YNR047W	FPK1	5.18468	4.93829	5.06091	5.13504	5.63198	5.49665	5.99164	6.01436		0.985853	0.00227167		-0.123765	0.196756		0.359658	0.517701
YIL083C	CAB2	6.57652	6.6094	6.85162	6.74187	6.27184	6.18844	5.84197	5.67582		0.318306	0.00232514		0.275102	0.132471		-0.429863	-0.512625
YNR074C	AIF1	2.57289	2.94486	2.86196	2.43296	3.15866	3.08576	3.91648	3.79286		0.858108	0.00238541		0.289066	-0.511899		0.757816	0.707091
YML018C	YML018C	5.60733	5.61265	5.60288	5.64559	6.56392	6.48285	6.87689	7.08226		0.951796	0.00240733		-0.00444591	0.032939		0.312964	0.599407
YOR041C	YOR041C	-0.415037	1.58015	-0.621488	0.163499	1.0072	0.807355	2.49057	2.82171		0.437422	0.00241083		-0.206451	-1.41665		1.48337	2.01436
YDL029W	ARP2	6.15056	6.31922	6.1418	6.23879	6.10852	6.33056	5.79753	5.75114		0.736567	0.00245996		-0.00875906	-0.0804336		-0.310993	-0.579416
YER088C	DOT6	5.72192	5.49601	5.94977	6.06026	6.26322	6.40361	6.6837	6.81044		0.0082799	0.00252994		0.227849	0.564249		0.420474	0.406835
YNL289W	PCL1	4.53543	4.56986	4.87578	4.77241	4.40871	4.31687	3.7126	3.61471		0.359023	0.00253169		0.340349	0.202558		-0.696116	-0.70216
YDR403W	DIT1	2.3505	2.59932	2.72465	2.93168	3.774	3.44095	4.24031	4.28318		0.475002	0.00253708		0.374153	0.332365		0.466318	0.842229
YCR045C	RRT12	-0.621488	-0.184425	-2.39593	-1.59946	-1.02915	-0.971431	0.62293	0.970854		0.151727	0.00259587		-1.77444	-1.41504		1.65208	1.94228
YBR023C	CHS3	5.35614	5.32661	5.37086	5.27165	5.6642	5.55305	5.98687	6.07361		0.83389	0.00260351		0.0147179	-0.0549595		0.322668	0.520553
YDR398W	UTP5	4.37226	4.66903	4.88118	4.71809	4.90593	5.01525	4.52982	4.43896		0.289847	0.00260776		0.50892	0.0490608		-0.376108	-0.57629
YOL140W	ARG8	6.14954	6.17413	6.25437	6.37487	6.02481	5.97636	5.59604	5.50016		0.60673	0.00261192		0.104823	0.200739		-0.428767	-0.476199
YGL060W	YBP2	1.70487	1.89142	2.08066	2.19849	2.41414	2.44095	3.01614	2.99095		0.333969	0.00268426		0.375786	0.307075		0.602004	0.550003
YCR004C	YCP4	5.92077	6.06889	5.73606	5.87455	5.58376	5.53045	4.91886	5.07553		0.228607	0.00270827		-0.184706	-0.194335		-0.664897	-0.454913
YML102W	CAC2	2.59932	2.58976	2.71589	2.37016	2.65306	2.45154	3.28983	3.37851		0.93417	0.00270827		0.116576	-0.219599		0.636774	0.926971
YGR118W	RPS23A	9.50498	9.39945	9.54805	9.45908	9.1811	8.97945	8.67807	8.64854		0.985853	0.00271078		0.0430734	0.0596344		-0.503031	-0.330916
YGR161W-C	YGR161W-C	6.44493	6.74833	6.78123	6.51649	7.12763	7.33163	7.66619	7.81615		0.985853	0.00272689		0.336297	-0.231839		0.538555	0.484518
YLR075W	RPL10	9.74123	9.78326	9.53376	9.57533	9.09093	9.21364	8.82161	8.74756		0.0423613	0.00275168		-0.207473	-0.207929		-0.269318	-0.466084
YLR188W	MDL1	5.37955	5.32193	5.37191	5.37782	5.54473	5.37121	4.926	5.05311		0.97842	0.00275725		-0.00764436	0.0558898		-0.618733	-0.318099
YNL194C	YNL194C	3.15056	2.95606	2.55582	2.15704	3.6241	3.85599	4.28392	4.63517		0.0611052	0.00280474		-0.594744	-0.799013		0.659821	0.779184
YIL110W	HPM1	3.55827	3.79909	3.67016	3.59932	3.55704	3.49825	4.13422	4.25852		0.862378	0.00281874		0.111893	-0.19977		0.577179	0.760268
YLR402W	YLR402W	7.57856	7.33503	7.27352	7.01859	7.69864	6.77056	8.17622	8.14517		0.0954707	0.00282069		-0.305046	-0.316443		0.477588	1.3746
YPR013C	CMR3	6.21043	6.12495	6.13381	6.25191	6.67469	6.80387	7.11312	7.23745		0.985853	0.00290431		-0.0766177	0.12696		0.43843	0.433576
YHR205W	SCH9	5.64241	5.54844	5.70432	5.59872	5.60763	5.72329	5.31143	5.18031		0.973152	0.00290794		0.0619059	0.0502859		-0.296196	-0.542978
YPR198W	SGE1	4.40667	4.40531	4.16511	3.96809	5.33128	4.93923	5.66107	5.74685		0.0269822	0.00292366		-0.241565	-0.437221		0.32979	0.807624
YIL158W	AIM20	4.80787	4.75862	5.23228	4.91791	4.53045	5.142	3.98185	4.10936		0.346669	0.0029398		0.424407	0.159286		-0.548593	-1.03264
YER158C	YER158C	6.41549	6.20653	6.60363	6.5735	7.62469	7.64024	8.01318	7.99859		0.124798	0.00294903		0.188138	0.36697		0.388497	0.358345
YCR079W	PTC6	4.61294	4.64674	4.63691	4.84348	4.90737	4.91025	5.38922	5.39609		0.867617	0.00298812		0.0239724	0.196743		0.481851	0.485838
YIL115C	NUP159	5.21762	5.04439	5.30195	5.37608	5.15704	5.16712	4.77558	4.75756		0.366729	0.00300762		0.0843349	0.331688		-0.381466	-0.40956
YJR045C	SSC1	9.11174	8.82956	9.12779	9.00146	9.66	9.59578	9.99618	10.0637		0.888184	0.00305157		0.0160524	0.1719		0.336181	0.467926
YGL206C	CHC1	6.74174	6.56133	6.72069	6.7952	6.58346	6.3799	6.11915	6.0398		0.817848	0.00319586		-0.0210477	0.233869		-0.46431	-0.340102
YPL015C	HST2	5.30925	5.12763	5.24717	5.16872	5.87209	5.8268	6.30979	6.2891		0.90459	0.00321895		-0.062081	0.041089		0.437705	0.462294
YKL004W	AUR1	7.05463	7.0258	6.76951	6.53325	7.18031	7.1298	7.48679	7.65263		0.000453408	0.00322207		-0.285124	-0.492552		0.306488	0.522832
YOR337W	TEA1	4.36597	4.25323	4.3978	4.45352	4.70487	4.4614	5.03914	5.15745		0.807813	0.00324492		0.0318305	0.200285		0.334266	0.69605
YNL221C	POP1	3.65764	3.65764	3.70155	3.73877	3.90785	4.12516	4.48349	4.53916		0.976697	0.00330627		0.0439091	0.0811278		0.575641	0.414004
YGL114W	YGL114W	4.17233	4.10936	4.19692	4.14241	4.60348	4.41007	4.98504	5.02503		0.985853	0.00331548		0.0245942	0.0330529		0.381567	0.614959
YLR313C	SPH1	2.18269	2.29572	2.32481	2.28688	2.70044	2.6893	3.46074	3.26903		0.985853	0.00332507		0.142118	-0.00884188		0.760303	0.579734
YHR143W	DSE2	5.95606	5.70764	6.06544	6.15906	6.48462	6.40803	5.99481	6.02215		0.193009	0.00333592		0.109386	0.451429		-0.489816	-0.385887
YOR095C	RKI1	4.99548	5.20006	4.86839	4.79025	4.0045	4.24945	3.35191	3.40054		0.147066	0.00334525		-0.127094	-0.409814		-0.65259	-0.848907
YOR014W	RTS1	6.41566	6.45385	6.58406	6.5245	6.50001	6.59828	6.12619	6.2116		0.736981	0.00337635		0.168403	0.0706558		-0.373817	-0.38668
YNL156C	NSG2	5.07168	5.14568	4.95327	4.7126	5.01748	4.55213	5.60763	5.33557		0.124581	0.00338741		-0.118412	-0.433082		0.59015	0.783438
YCL037C	SRO9	6.06026	6.05853	6.20065	5.94416	5.77584	5.61117	5.32912	5.0018		0.973757	0.00340953		0.14039	-0.114377		-0.446717	-0.60937
YDL175C	AIR2	2.12102	3.08066	3.1375	2.90689	3.37434	3.92125	4.40054	4.35826		0.688048	0.00351255		1.01649	-0.173767		1.02619	0.43701
YGR205W	TDA10	5.43729	5.58496	5.69153	5.72683	4.62	4.57531	3.92695	4.0027		0.525498	0.0035267		0.25424	0.141869		-0.693052	-0.57261
YAL035W	FUN12	5.85922	5.79909	5.95675	5.92291	5.64501	5.89748	5.41819	5.30049		0.774439	0.00359588		0.0975295	0.123824		-0.22682	-0.596993
Q0050	AI1	-4.05889	-4.05889	-3.18442	-4.05889	-1.51457	0.0285692	-2.94342	-2.94342		0.912927	0.00362322		0.874469	0		-1.42884	-2.97199
YJL051W	IRC8	3.26003	3.29572	3.16511	3.33342	3.25096	3.66676	2.85	2.81352		0.87293	0.00364058		-0.0949177	0.0377007		-0.400962	-0.853232
YDR308C	SRB7	2.45418	2.21101	2.87774	2.9241	3.1177	3.852	4.18507	4.45418		0.182193	0.00367777		0.423568	0.713088		1.06738	0.602177
YJR104C	SOD1	8.59757	8.64609	8.61486	8.39159	8.12335	8.53029	7.9739	7.6994		0.431104	0.00367777		0.0172886	-0.254503		-0.149447	-0.83089
YML012W	ERV25	8.28457	8.16621	8.11458	8.11795	7.90635	7.81852	7.51207	7.40011		0.401884	0.00367874		-0.169994	-0.0482586		-0.394281	-0.418407
YOL019W-A	YOL019W-A	0.910733	0.748461	0.713696	0.918386	2.08406	2.14078	4.00899	3.71918		0.985853	0.00374597		-0.197037	0.169925		1.92492	1.5784
YFR035C	YFR035C	-1.32193	-1.47393	-0.514573	-0.321928	0.847997	0.910733	2.7761	2.48543		0.790284	0.00374701		0.807355	1.152		1.92811	1.57469
YNR021W	YNR021W	7.25011	7.25937	7.31533	7.33914	7.26444	7.28559	6.89809	6.90111		0.921629	0.00374701		0.0652218	0.0797707		-0.366355	-0.384479
YJL163C	YJL163C	3.74524	3.35614	3.40327	3.41414	4.30305	4.28762	4.79494	4.80012		0.60818	0.00376268		-0.34197	0.0579917		0.491886	0.512503
YMR117C	SPC24	2.70487	3.08576	2.55827	3.33199	3.02326	3.63807	2.26003	2.17313		0.985853	0.00377349		-0.146604	0.246227		-0.76323	-1.46495
YDR212W	TCP1	6.24394	6.37121	6.32012	6.22246	5.98755	6.30195	5.72547	5.6946		0.762883	0.00379505		0.076188	-0.148754		-0.26208	-0.607352
YOR083W	WHI5	3.68594	3.25399	3.21878	3.32337	2.19219	1.96717	0.863938	0.536053		0.631572	0.00388367		-0.467159	0.0693808		-1.32826	-1.43112
YKL198C	PTK1	4.57713	4.40122	4.67299	4.59276	3.97545	4.11603	4.59515	4.50526		0.697851	0.00388367		0.0958643	0.191535		0.619699	0.389224
YJL077W-A	YJL077W-A	7.36343	7.1979	8.00051	7.55205	7.57024	7.50787	8.19081	8.11515		0.0722342	0.00403803		0.637073	0.35415		0.620577	0.607274
YGR031C-A	NAG1	-0.0291463	0.226509	-0.234465	-0.0144996	1.23879	0.879706	3.15218	2.19535		0.928791	0.00407825		-0.205319	-0.241008		1.9134	1.31564
YBR245C	ISW1	2.65076	2.774	3.01792	2.69377	2.50589	3.09761	2.11437	2.27202		0.718112	0.00408681		0.367157	-0.0802306		-0.391524	-0.825588
YOR274W	MOD5	4.47638	4.5008	4.58856	4.77505	4.81044	5.14527	5.54844	5.44228		0.594889	0.00408966		0.112183	0.274248		0.737994	0.29701
YOR162C	YRR1	3.33914	3.46336	3.51096	3.61235	3.93734	4.22188	4.67582	4.50271		0.739757	0.00420182		0.171825	0.148992		0.738472	0.280835
YNL071W	LAT1	7.21023	7.0863	7.04549	7.17582	6.89978	6.87529	6.49297	6.52184		0.777289	0.00421218		-0.164746	0.0895285		-0.406805	-0.353453
YOR187W	TUF1	7.45072	7.46801	7.72062	7.60274	6.50351	6.72697	6.17652	6.2292		0.325739	0.00421533		0.269904	0.134723		-0.326986	-0.497764
YEL056W	HAT2	4.75275	4.74308	4.98732	4.80787	4.97774	5.02857	4.60288	4.31252		0.693044	0.00421533		0.234572	0.064786		-0.374853	-0.716049
YBR118W	TEF2	6.40327	6.49442	6.62205	6.75649	6.2765	6.7385	6.12619	5.88777		0.246356	0.00423684		0.218784	0.262074		-0.150308	-0.850729
YKL175W	ZRT3	6.12371	6.06221	6.32157	6.29609	6.69223	6.52607	7.11447	6.96301		0.258841	0.00425202		0.19786	0.233882		0.422239	0.436943
YGL009C	LEU1	6.50795	6.30488	6.62907	6.63938	6.60733	6.61324	6.25795	6.23496		0.288929	0.00427745		0.121112	0.334501		-0.349377	-0.378276
YDL085C-A	YDL085C-A	6.1918	6.35421	6.37955	6.68762	6.10161	6.67243	5.66789	5.61294		0.549258	0.00427745		0.187752	0.333415		-0.433716	-1.05948
YKR020W	VPS51	3.50843	3.96901	3.46467	3.33914	4.33771	4.23955	5.01703	4.96301		0.471652	0.00429202		-0.0437604	-0.629875		0.67932	0.723461
YJR015W	YJR015W	4.89288	4.48414	4.9607	4.70432	5.23611	5.13463	5.73064	5.78267		0.847289	0.00430999		0.0678203	0.220181		0.49453	0.648039
YDR447C	RPS17B	6.74241	6.86839	6.83933	6.49809	5.90521	6.53029	5.58496	5.64097		0.48506	0.00434208		0.0969193	-0.370299		-0.320244	-0.889321
YPR099C	YPR099C	-0.152003	-1.32193	-1.35845	1.17632	1.87184	1.33914	2.66676	3.89433		0.7181	0.00435091		-1.20645	2.49825		0.794913	2.5552
YDR438W	THI74	4.69432	4.34837	4.50208	4.49249	5.05441	4.89772	5.46205	5.50811		0.888184	0.00436758		-0.192247	0.14412		0.407638	0.610387
YIL143C	SSL2	4.24869	4.15381	4.09592	4.08576	4.63575	4.53419	4.98732	5.09466		0.492006	0.0043799		-0.152762	-0.0680408		0.351566	0.560472
YJR092W	BUD4	3.95977	3.79805	3.93452	3.64847	3.28096	3.76977	2.96901	2.9855		0.665779	0.00441255		-0.0252537	-0.149585		-0.311944	-0.784271
YPR033C	HTS1	6.77571	6.85537	6.82744	6.79207	6.64847	6.36036	6.12226	5.98664		0.882644	0.00441806		0.0517289	-0.0632924		-0.526207	-0.373726
YOR081C	TGL5	4.53481	4.51349	4.68145	4.84499	4.22419	3.94673	3.62994	3.37295		0.305876	0.00444509		0.146641	0.331497		-0.594255	-0.573779
YPL168W	MRX4	2.63691	2.11437	2.67582	2.88362	3.38267	3.60051	4.0798	4.15299		0.498086	0.00448035		0.0389014	0.769254		0.697138	0.552487
GTK30J00160	GTK30J00160	6.74806	6.97085	6.68356	6.78986	6.34003	6.26679	5.91385	5.80116		0.41269	0.00449628		-0.0645025	-0.180994		-0.426181	-0.465628
YOR034C-A	YOR034C-A	4.53543	4.52544	4.37573	4.26978	4.9279	5.73796	6.25984	6.13237		0.716974	0.00452637		-0.159696	-0.255661		1.33194	0.394414
YBR076W	ECM8	-1.94342	-0.761213	-2.12029	-2.94342	-1.47393	-3.05889	0.263034	0.400538		0.54473	0.00453294		-0.176878	-2.1822		1.73697	3.45943
YMR240C	CUS1	2.33056	2.23573	2.26604	1.68257	1.99277	2.27202	3.0268	2.90304		0.631286	0.00453294		-0.0645215	-0.553154		1.03403	0.631015
YGL183C	MND1	-1.2863	-1.05889	-1.51457	-0.862496	1.1375	1.66903	2.37573	2.54597		0.985853	0.00454001		-0.228269	0.196397		1.23823	0.876942
YGR020C	VMA7	8.11764	8.14883	8.11634	8.13776	7.76931	8.00944	7.50319	7.4002		0.877554	0.00454733		-0.00129914	-0.0110728		-0.266119	-0.60924
YOR005C	DNL4	3.31325	3.40327	3.53854	3.39094	3.96809	4.1643	4.47379	4.6153		0.862378	0.00455839		0.225292	-0.0123249		0.505696	0.450995
YLR304C	ACO1	7.98413	7.8695	8.28327	8.34784	7.67108	7.33387	7.14802	6.95338		0.00155146	0.00456336		0.29914	0.478341		-0.523062	-0.380489
YJL167W	ERG20	7.26941	7.11946	7.27929	7.40207	7.24422	7.39755	7.03045	6.78267		0.650521	0.00456983		0.00987832	0.282614		-0.213775	-0.614876
YOR100C	CRC1	2.74631	3.03034	3.14241	2.854	1.23879	1.46467	2.64386	2.29278		0.942931	0.00463162		0.396101	-0.17634		1.40507	0.828113
YLR234W	TOP3	1.43296	1.64616	0.831877	1.38957	2.1177	2.42223	3.02326	2.93923		0.43637	0.00467086		-0.601082	-0.256596		0.90556	0.516994
YIL046W-A	YIL046W-A	2.54844	3.12102	3.22342	2.29278	2.81352	2.67807	4.67299	3.86987		0.985853	0.00467849		0.674986	-0.828234		1.85947	1.1918
YJR052W	RAD7	2.45943	2.60644	2.26003	2.67356	3.54844	3.63575	4.17153	4.1235		0.888184	0.00468382		-0.199406	0.0671142		0.62309	0.487746
YJL187C	SWE1	3.44493	3.24336	3.47508	3.19692	2.81762	3.18587	2.33628	2.36457		0.954508	0.00469181		0.0301528	-0.0464427		-0.48134	-0.821294
YGL196W	DSD1	3.47638	3.57652	3.99095	4.05137	4.30159	4.33271	4.80374	4.88801		0.0278784	0.00473544		0.514573	0.47485		0.502156	0.555305
YBR214W	SDS24	6.35597	6.31052	6.50827	6.59006	6.65163	6.43696	6.96832	6.98071		0.288929	0.00473631		0.152302	0.279541		0.316695	0.543749
YIL013C	PDR11	6.77597	6.60036	6.6453	6.66007	7.55175	7.43838	7.88448	7.88234		0.751919	0.00474274		-0.130674	0.0597083		0.332729	0.443961
YNL288W	CAF40	6.01903	5.86617	6.14588	6.19928	6.54024	6.25191	6.94533	6.81391		0.27327	0.00477539		0.126847	0.333114		0.405082	0.562001
YML067C	ERV41	4.98959	4.91743	4.87627	4.81198	5.22458	5.39266	5.79442	5.76447		0.565472	0.00477539		-0.113322	-0.105447		0.569835	0.371813
YDR060W	MAK21	4.44361	4.56621	4.66959	4.58195	3.91934	4.49761	3.69933	3.59335		0.765328	0.00477539		0.225987	0.0157475		-0.220011	-0.904259
YBL067C	UBP13	5.1177	5.08023	5.10182	5.07211	4.98504	5.23381	4.66278	4.67299		0.863512	0.00477539		-0.0158769	-0.00812547		-0.32227	-0.56082
YDR099W	BMH2	7.53559	7.46752	7.5256	7.62337	7.1374	7.08236	6.78555	6.59694		0.924078	0.00477863		-0.00998733	0.155845		-0.351851	-0.485427
YGL223C	COG1	4.1152	4.39643	4.27277	4.31107	4.2891	4.31034	4.78136	4.88264		0.985853	0.00477863		0.15757	-0.0853664		0.492263	0.572303
YDR322W	MRPL35	4.23343	4.33271	4.65878	4.44758	3.77189	3.77189	3.16189	3.0018		0.362362	0.00478879		0.425355	0.114871		-0.609998	-0.770083
YDL078C	MDH3	6.07425	6.15381	6.14731	6.32265	5.80581	5.851	5.44162	5.30086		0.783984	0.00478879		0.0730582	0.168844		-0.364192	-0.550144
YMR147W	YMR147W	4.55336	4.4019	4.79338	4.64501	4.59515	4.96301	4.07639	4.14649		0.524809	0.00479969		0.240015	0.243106		-0.518757	-0.816519
YMR109W	MYO5	4.62234	4.56377	4.63052	4.77505	4.36527	4.55152	3.94017	4.09508		0.802438	0.00488591		0.00817724	0.211282		-0.425106	-0.456436
YHR009C	TDA3	7.03309	7.01223	6.99594	7.09993	6.52482	6.58691	6.15543	6.20065		0.985853	0.00488591		-0.0371559	0.0876929		-0.36939	-0.386261
YDL212W	SHR3	7.07446	6.99605	7.13965	7.01089	7.17572	7.55436	6.87541	6.95396		0.988588	0.00488626		0.065191	0.014842		-0.300313	-0.600395
YBL099W	ATP1	8.63201	8.51219	8.99416	9.00613	8.01926	8.23084	7.85493	7.57713		0.000136609	0.00490371		0.362142	0.493942		-0.164326	-0.65371
YNL096C	RPS7B	7.21917	7.18488	7.39823	7.52646	6.78503	6.46401	6.1206	6.14731		0.142229	0.00492071		0.179062	0.341585		-0.664427	-0.316708
YGR286C	BIO2	6.79468	6.88972	7.04221	6.86962	6.16491	6.1631	5.72301	5.76713		0.78161	0.00493828		0.247531	-0.0200922		-0.441895	-0.395971
YIL126W	STH1	4.12433	4.06523	4.05832	4.15947	4.02237	4.23955	3.65764	3.71809		0.952055	0.00497662		-0.0660116	0.0942401		-0.364728	-0.521463
YKL177W	YKL177W	-0.0740006	0.757023	-0.268817	-1.05889	1.36177	1.15056	3.32625	2.50843		0.665779	0.00508546		-0.194816	-1.81592		1.96448	1.35787
YDL051W	LHP1	5.78188	5.81583	5.81198	5.76739	5.28133	5.73281	4.92172	4.95791		0.889041	0.00508546		0.0301005	-0.0484416		-0.359605	-0.774897
YML108W	YML108W	4.63227	4.37573	4.59872	4.41616	4.75007	4.94626	5.45253	5.67469		0.985853	0.00508546		-0.0335457	0.0404296		0.702459	0.728424
YKL153W	YKL153W	7.00876	7.79097	5.30597	4.55213	4.80064	4.88606	4.15218	4.16752		6.96039e-22	0.00515613		-1.70279	-3.23884		-0.648458	-0.718544
YGL166W	CUP2	3.78346	4.00809	4.10014	3.99729	5.17592	5.33914	5.84674	5.72492		0.86736	0.00525295		0.31668	-0.0108		0.67082	0.385786
YFL001W	DEG1	3.62644	3.50335	3.66107	3.90304	3.92315	4.37643	4.74416	4.74093		0.634598	0.00526326		0.0346263	0.39969		0.821012	0.364498
YLR130C	ZRT2	6.09001	6.04045	6.10182	6.11478	6.14934	5.92434	6.48913	6.48945		0.989252	0.00526326		0.0118116	0.0743293		0.339785	0.565109
YHR008C	SOD2	3.33485	3.35332	3.94205	4.25626	4.24869	4.25701	5.18745	4.69432		0.0152696	0.00530536		0.607191	0.902933		0.938764	0.437312
YIL003W	CFD1	3.37851	3.10769	3.15381	3.35896	3.73552	3.86096	4.52042	4.35191		0.985853	0.00534043		-0.224706	0.251271		0.7849	0.490948
YDR037W	KRS1	6.3565	6.42727	6.3361	6.40344	6.14241	6.2267	5.8301	5.76607		0.820922	0.00536933		-0.0203912	-0.0238328		-0.31231	-0.460636
YIL123W	SIM1	8.00332	7.67878	7.86808	7.85044	7.68475	7.71445	7.36711	7.34332		0.952061	0.00536933		-0.135239	0.171661		-0.31764	-0.371133
YER025W	GCD11	6.66959	6.77162	6.63735	6.50843	6.05094	5.98618	5.60674	5.62702		0.258906	0.00547349		-0.0322443	-0.263193		-0.444199	-0.35916
YPL119C	DBP1	2.1177	1.48027	2.33914	2.15381	1.36737	1.33342	2.09761	2.37851		0.440452	0.00547349		0.221442	0.67354		0.73024	1.04509
YOL036W	YOL036W	5.22728	5.17393	5.1815	5.24146	5.29094	5.36562	5.76182	5.69822		0.936215	0.00547349		-0.0457788	0.0675319		0.470877	0.332596
YOR286W	RDL2	6.44758	6.52623	6.5694	6.53978	6.33235	6.34163	5.6851	5.92481		0.962819	0.00559442		0.121821	0.0135538		-0.647251	-0.416818
YCR061W	YCR061W	-0.104697	0.189034	-0.304006	-0.556393	0.378512	0.516015	1.58015	1.43829		0.630215	0.00566468		-0.199309	-0.745427		1.20163	0.922278
YGR155W	CYS4	6.42408	6.43229	6.15866	6.12516	5.74362	5.99616	5.3579	5.51065		0.00436806	0.00579705		-0.265422	-0.307136		-0.385719	-0.485517
YIL073C	SPO22	0.641546	0.941106	0.333424	0.495695	1.41684	2.13422	2.56071	2.57773		0.455516	0.00580938		-0.308122	-0.445411		1.14388	0.44351
YNL313C	EMW1	3.96809	4.01078	4.1375	4.20163	4.56133	4.81558	5.18269	5.07468		0.552885	0.00581489		0.169413	0.190854		0.621366	0.259101
YFL055W	AGP3	3.75809	3.79286	3.7939	4.02591	5.27612	5.00045	5.59335	5.65935		0.832639	0.00581603		0.0358059	0.233059		0.317229	0.658903
YJL200C	ACO2	3.07382	2.49313	3.31759	3.23113	2.62059	3.00899	2.11103	2.04264		0.139729	0.00582004		0.243773	0.73799		-0.509555	-0.966344
YHR021C	RPS27B	8.94997	9.34336	9.17335	9.02065	8.81086	8.36934	8.16048	7.9913		0.76233	0.00588947		0.22338	-0.322717		-0.650384	-0.378041
YOR157C	PUP1	6.192	6.0663	6.29352	6.2182	6.39797	6.39951	6.00158	5.93499		0.744963	0.00591196		0.101521	0.151895		-0.396397	-0.464525
YDR277C	MTH1	5.79805	5.78738	6.14384	6.20222	5.62176	5.58015	5.22149	5.09635		0.00532541	0.00603054		0.345792	0.414842		-0.400268	-0.483799
YOR258W	HNT3	3.75916	4.38198	4.22033	3.98368	3.41143	3.61117	4.30816	4.20477		0.973064	0.00603176		0.461174	-0.398298		0.896731	0.593594
YOR237W	HES1	8.52677	8.62425	8.63245	8.58916	9.40812	9.67402	9.13299	9.20555		0.985853	0.00617727		0.105677	-0.0350829		-0.275129	-0.468467
YML120C	NDI1	5.25965	5.01748	5.68454	5.81762	5.29719	5.05094	5.81737	5.54288		8.36805e-06	0.00619908		0.424889	0.800147		0.520176	0.49194
YPL249C-A	RPL36B	7.96133	7.86697	7.73552	7.67701	7.29398	7.89081	7.1057	7.06145		0.0658948	0.00622122		-0.225812	-0.189955		-0.188278	-0.829359
YOL055C	THI20	3.67016	3.71039	3.68482	3.88166	3.74416	3.59813	3.16993	2.92029		0.927178	0.00625799		0.0146582	0.171271		-0.574236	-0.677834
YDR461W	MFA1	6.20867	6.37069	6.84386	6.75181	6.14078	6.41937	7.06824	6.92719		0.125409	0.00625813		0.635185	0.381124		0.927462	0.507815
YGR003W	CUL3	3.50843	3.46467	3.86888	3.74201	4.24869	4.41414	4.70874	4.88606		0.151727	0.00630169		0.360456	0.277338		0.460052	0.471927
YHR138C	YHR138C	5.30961	5.393	5.3726	5.64789	6.55075	6.32175	6.90869	7.03837		0.824811	0.00635686		0.0629911	0.254886		0.357946	0.716623
YMR289W	ABZ2	4.39438	4.64386	4.50271	4.46793	4.33914	4.48478	3.904	3.76341		0.8374	0.006362		0.108336	-0.175925		-0.435135	-0.721371
YHL027W	RIM101	5.81275	5.57561	5.61471	5.77452	6.14405	6.22052	6.53341	6.58361		0.916765	0.006362		-0.198045	0.198909		0.389361	0.363086
YOL101C	IZH4	8.40841	8.45627	8.49933	8.40433	7.90983	8.11645	7.58954	7.69864		0.962819	0.006362		0.090913	-0.0519396		-0.320294	-0.417813
YHL028W	WSC4	4.91934	4.67299	5.54566	5.82477	4.73118	4.92932	4.36177	4.39438		5.90911e-10	0.00641529		0.626319	1.15178		-0.369415	-0.534941
YDL126C	CDC48	7.25144	7.23525	7.2971	7.26725	7.57622	7.52027	7.21169	7.20877		0.995083	0.00642373		0.0456646	0.0320065		-0.364526	-0.311494
YDL240W	LRG1	3.39094	3.26754	3.05311	3.29131	2.81352	2.88947	2.34767	2.17951		0.458347	0.00645532		-0.337831	0.0237731		-0.465859	-0.709962
YGL077C	HNM1	7.17881	7.06447	7.1177	7.07275	8.10502	8.03216	8.37326	8.51464		0.793478	0.00645532		-0.0611192	0.00827562		0.268239	0.482479
YDL079C	MRK1	5.05745	4.96347	4.94205	5.02148	4.12681	4.19456	3.78241	3.46074		0.814081	0.00653814		-0.115405	0.0580056		-0.344399	-0.733817
YCL025C	AGP1	7.14476	6.96093	7.14109	7.01714	6.7849	6.488	6.14445	6.27352		0.985853	0.00653814		-0.00367488	0.0562138		-0.640442	-0.214485
YER110C	KAP123	7.20016	7.03881	7.1918	7.31198	6.82642	6.66192	6.43513	6.31016		0.705192	0.00661857		-0.00836347	0.273166		-0.391293	-0.351762
YMR244W	YMR244W	-0.152003	0.275007	-0.599462	-1.152	-0.0740006	-0.234465	1.80323	0.970854		0.451854	0.00669448		-0.447459	-1.42701		1.87723	1.20532
YIL066W-A	YIL066W-A	0.124328	-0.0439433	-1.64386	-1.47393	2.08746	1.25096	3.0036	3.11936		0.475002	0.00669448		-1.76818	-1.42999		0.916139	1.86839
YGR282C	BGL2	9.8655	9.4542	10.1594	10.2344	10.7785	10.3106	11.1269	11.0423		0.00142664	0.00669674		0.293853	0.78025		0.348411	0.731619
YDL243C	AAD4	5.23726	5.48993	5.77162	5.75195	5.77215	5.77321	5.31868	5.34944		0.0299913	0.00669674		0.534364	0.262017		-0.453471	-0.423769
YDR048C	YDR048C	0.0285692	0.454176	-0.168123	0.0426443	-0.120294	-1.05889	2.21101	1.83592		0.916765	0.00674513		-0.196692	-0.411532		2.33131	2.89482
YGR019W	UGA1	5.97934	5.8775	6.0766	6.21568	6.13052	6.22226	5.77241	5.80993		0.328063	0.00675478		0.0972624	0.33818		-0.358106	-0.412335
YLR173W	YLR173W	4.68538	4.53419	4.52419	4.68145	4.79233	4.51475	5.07767	5.2521		0.905336	0.00675664		-0.16119	0.147263		0.285335	0.737344
YFL026W	STE2	6.98652	6.92588	7.57698	7.53706	6.893	6.74537	6.48704	6.36229		1.80304e-08	0.00681311		0.590451	0.611182		-0.405962	-0.383077
YBL056W	PTC3	6.67962	6.67821	6.76752	6.74725	6.41532	6.45236	6.08279	6.03078		0.905336	0.00683914		0.0879015	0.0690403		-0.332532	-0.421587
GTK30D03070	GTK30D03070	4.81301	4.59156	4.68706	4.50906	4.84699	4.36107	5.13011	5.28281		0.614971	0.00687985		-0.125951	-0.0824974		0.283112	0.921744
YDR519W	FPR2	7.142	7.40259	7.00506	6.83428	7.26604	7.53566	6.81647	7.05344		0.0112913	0.00688233		-0.136942	-0.568304		-0.449565	-0.482227
YOL031C	SIL1	4.34625	4.39025	4.34837	4.32553	4.41346	4.78241	3.774	4.18269		0.85132	0.00688492		0.0021263	-0.0647246		-0.639462	-0.599716
YJL112W	MDV1	1.90689	2.24793	2.13093	1.85599	2.22342	1.89918	2.78031	2.7866		0.852912	0.00690078		0.22404	-0.391938		0.556888	0.887421
YLR007W	NSE1	3.70708	3.96532	3.87676	3.94017	4.51159	4.60348	5.13873	5.01302		0.985853	0.00690709		0.169679	-0.0251558		0.627138	0.409538
YIL074C	SER33	6.55919	6.60748	6.64198	6.67299	6.38059	6.08576	5.76951	5.81916		0.921629	0.00702604		0.0827936	0.0655127		-0.611084	-0.266607
YER136W	GDI1	8.21325	8.18676	8.2465	8.22511	8.11166	8.11218	7.8212	7.72908		0.985853	0.00709385		0.033253	0.038353		-0.290457	-0.383102
YKL085W	MDH1	7.23726	7.17941	7.31994	7.16148	6.49265	6.43346	6.12763	5.97476		0.985853	0.00712373		0.0826853	-0.0179269		-0.365021	-0.458702
YBL100C	YBL100C	4.45746	5.27538	3.9607	3.12433	3.34056	3.18587	1.848	1.83592		0.00230573	0.00715725		-0.496766	-2.15105		-1.49257	-1.34994
YER028C	MIG3	3.16027	2.41143	1.37295	0.584963	4.12598	4.06695	5.28466	5.27463		0.249931	0.00715725		-1.78732	-1.82646		1.15868	1.20768
YBL039C	URA7	4.9279	4.97774	5.00225	4.70653	4.8748	4.8334	5.32912	5.25096		0.623436	0.00715725		0.074356	-0.271207		0.454327	0.417565
YJR151C	DAN4	4.765	4.43162	5.44361	5.31325	7.10884	7.01569	6.65793	6.7666		1.34418e-09	0.00716024		0.678602	0.881623		-0.450912	-0.249099
YOR099W	KTR1	7.7952	7.74436	7.62746	7.63757	7.8936	7.84336	7.52974	7.52419		0.251236	0.00720457		-0.167735	-0.106796		-0.363862	-0.319167
YHL040C	ARN1	4.21956	4.11853	4.32769	4.38819	5.21645	5.67214	5.94134	5.91121		0.550285	0.00733424		0.108132	0.269664		0.724886	0.23907
YLR293C	GSP1	9.38797	9.32771	9.41931	9.29407	9.08483	8.90641	8.69902	8.53469		0.897098	0.00733424		0.0313329	-0.0336405		-0.385818	-0.371718
YGR171C	MSM1	3.76553	3.66789	3.851	3.63691	3.61471	3.8125	3.15381	3.12928		0.993002	0.00735861		0.0854646	-0.0309775		-0.460905	-0.683215
GTK30J03680	GTK30J03680	3.36597	3.92884	3.26153	3.28983	4.18507	4.36737	4.67638	5.0072		0.20655	0.00740527		-0.104442	-0.63901		0.491307	0.639824
YDR205W	MSC2	3.07382	2.96901	3.18745	3.33199	4.34908	3.97911	4.68762	4.63169		0.373511	0.00745225		0.113631	0.362979		0.338538	0.652576
YNL301C	RPL18B	6.74886	6.75007	6.55811	6.50764	6.13319	6.32247	5.72874	5.82426		0.0685192	0.00745686		-0.190749	-0.242434		-0.404457	-0.49821
YDR456W	NHX1	5.15866	5.01659	5.15623	5.25096	5.90159	5.80478	6.24679	6.24489		0.793332	0.00752309		-0.00242538	0.234376		0.345197	0.440111
YOR219C	STE13	4.43962	4.41616	4.40939	4.50208	5.08874	5.13381	5.47671	5.52231		0.985853	0.00753247		-0.0302322	0.0859118		0.38797	0.388497
YNL298W	CLA4	4.02591	3.774	4.14812	4.08746	3.56194	3.89821	3.25399	3.14405		0.448339	0.00757694		0.122206	0.313467		-0.307948	-0.754162
YBR011C	IPP1	9.76775	9.74	9.71327	9.76553	9.24117	8.93958	8.70058	8.69007		0.832639	0.00763349		-0.0544879	0.0255348		-0.540594	-0.249511
YHR128W	FUR1	5.15299	5.19061	5.21917	5.1639	4.13996	4.03562	3.63575	3.34625		0.970821	0.0076348		0.0661739	-0.0267136		-0.504206	-0.689376
YDR012W	RPL4B	5.26416	4.79753	5.31325	5.47184	5.10266	5.54009	4.78188	4.81813		0.198703	0.00776632		0.0490848	0.674306		-0.320774	-0.721955
YOR224C	RPB8	7.68811	7.74019	7.67455	7.37234	7.29352	7.22014	6.83061	6.84386		0.223497	0.00776632		-0.013565	-0.367843		-0.462907	-0.376278
YHR135C	YCK1	6.43979	6.29057	6.49793	6.39369	6.13031	6.08321	5.65735	5.77873		0.90164	0.00776632		0.0581423	0.103119		-0.472959	-0.304479
YML015C	TAF11	3.23726	3.14078	3.70708	3.06867	3.32625	3.36317	3.98823	3.9782		0.736981	0.00792765		0.469825	-0.0721078		0.661981	0.615025
YOR292C	YOR292C	4.12763	4.09845	4.24641	4.03034	4.48929	4.11686	4.90448	4.92742		0.988588	0.00802018		0.118775	-0.0681172		0.415198	0.810559
YDR293C	SSD1	6.02281	5.88362	6.15239	6.17891	6.94075	6.74806	7.2384	7.22362		0.310619	0.00805736		0.129575	0.295293		0.297651	0.475557
YJL026W	RNR2	10.214	10.0247	10.2617	10.6989	9.95322	9.78542	9.55142	9.44861		0.105608	0.0080715		0.0477876	0.674158		-0.401802	-0.336808
YDR527W	RBA50	2.74631	3.08406	3.37851	2.82782	3.72137	4.37782	4.63807	4.79597		0.793332	0.00812278		0.632199	-0.256245		0.916701	0.418157
YKR009C	FOX2	0.687061	0.933573	1.34483	0.83996	1.36737	1.5656	2.12763	2.25096		0.719944	0.00814714		0.657768	-0.0936131		0.760262	0.685364
YHR122W	CIA2	4.36317	4.61706	4.76447	4.63517	4.45154	5.00315	5.33092	5.39403		0.668508	0.00817309		0.401302	0.0181106		0.879376	0.390881
YNL245C	CWC25	5.11187	5.03078	4.97269	5.00135	5.01033	5.09043	5.6372	5.56529		0.746239	0.0082854		-0.139173	-0.0294256		0.626872	0.474862
YGL039W	YGL039W	8.43304	8.501	8.4074	8.46017	8.50633	8.46602	8.14313	8.16837		0.754504	0.00841487		-0.0256477	-0.040832		-0.363199	-0.297644
YJL014W	CCT3	5.81686	5.83415	5.7301	5.6279	5.59813	5.79025	5.20633	5.35685		0.252579	0.00852326		-0.0867592	-0.206256		-0.391796	-0.433403
YDL191W	RPL35A	7.18001	7.26115	6.84587	6.72165	5.98025	6.74953	5.71781	5.68342		0.000229858	0.00854296		-0.334142	-0.539509		-0.26244	-1.06612
YDR406W	PDR15	4.43029	4.39025	4.60881	4.58135	4.33985	4.39575	4.73444	4.76553		0.401994	0.00854296		0.178524	0.191096		0.394589	0.369786
YHR019C	DED81	7.7128	7.59246	7.57259	7.55735	6.89579	7.00899	6.6532	6.55873		0.486051	0.00854795		-0.140216	-0.0351082		-0.242584	-0.450262
YPL050C	MNN9	6.70874	6.5947	6.55105	6.65964	6.24203	6.57879	6.07617	5.89312		0.72481	0.00863824		-0.157685	0.0649414		-0.165857	-0.685668
YML028W	TSA1	9.4297	9.52462	9.2364	9.23304	9.604	9.50478	9.17375	9.25217		0.0181214	0.00866148		-0.193303	-0.291576		-0.430245	-0.252611
YMR146C	TIF34	6.9822	6.9622	6.99899	6.97062	6.80516	6.55075	6.19081	6.31542		0.93989	0.00878651		0.0167902	0.00842166		-0.614351	-0.235325
YMR316C-A	YMR316C-A	2.21412	1.68706	2.01436	1.85997	3.06523	1.75702	3.9607	3.74416		0.985853	0.00878651		-0.19977	0.172909		0.895469	1.98714
GTK30J00250	GTK30J00250	1.88362	2.28096	1.56071	1.94486	2.51349	2.53605	3.22342	3.32337		0.578762	0.00890275		-0.322906	-0.336098		0.709932	0.787317
YNR048W	YNR048W	2.87774	2.91265	3.1127	3.06005	3.55827	3.47249	4.17632	4.05311		0.790284	0.00894827		0.234956	0.147398		0.618055	0.580624
YDR096W	GIS1	4.79805	4.74039	5.09085	5.16027	4.54102	4.68482	4.16752	4.22882		0.012265	0.00909125		0.292803	0.419887		-0.373501	-0.456
YMR250W	GAD1	3.04264	3.27947	2.70929	3.06523	3.58015	3.10098	3.91648	4.07296		0.349207	0.00919047		-0.333354	-0.214244		0.336331	0.971986
YOL094C	RFC4	4.5656	4.78712	4.50016	4.45615	4.49378	4.26604	3.6241	3.87971		0.34275	0.00922641		-0.0654325	-0.33097		-0.869675	-0.386331
YNL070W	TOM7	7.27435	7.30761	7.30834	7.75181	7.08247	7.24441	6.48156	6.7324		0.524809	0.00935838		0.0339842	0.444201		-0.600911	-0.512007
YFR024C-A	LSB3	5.55949	5.57652	5.39438	5.33092	5.9521	6.21684	5.70487	5.72874		0.0596771	0.00936919		-0.165115	-0.245605		-0.247229	-0.488106
YJL211C	YJL211C	0.400538	0.238787	-0.217591	-1.59946	2.57773	2.77189	3.41414	3.95884		0.594889	0.00939501		-0.618129	-1.83825		0.836405	1.18696
YHR027C	RPN1	6.02459	6.00787	6.02525	6.15785	6.21762	6.28318	5.96185	5.85997		0.917676	0.00942102		0.000664683	0.149984		-0.255764	-0.423211
YBL024W	NCL1	4.63807	4.66846	4.69988	4.72846	4.10434	4.41549	3.79805	3.73769		0.976694	0.00942102		0.0618109	0.0600052		-0.306286	-0.677802
YDL137W	ARF2	7.99447	8.00899	7.87701	7.96168	7.51167	7.41295	7.12288	7.01781		0.539582	0.00942794		-0.117459	-0.0473076		-0.388794	-0.39514
YPL067C	YPL067C	4.23802	4.35262	4.40054	4.41886	4.96993	5.11312	5.56041	5.57531		0.914978	0.00957077		0.162515	0.0662473		0.590476	0.462195
YHR047C	AAP1	6.13443	5.98299	6.15218	6.22901	5.88972	5.73498	5.51696	5.31868		0.708609	0.00958011		0.0177571	0.246017		-0.372756	-0.416302
YFL005W	SEC4	6.56071	6.85587	6.81301	6.72819	6.15785	6.41633	5.93003	5.71039		0.985853	0.00959534		0.252297	-0.127673		-0.227825	-0.70594
GTK30B00160	GTK30B00160	1.33342	2.08066	1.04264	1.25096	2.52105	2.23879	3.23113	3.12763		0.359023	0.00963585		-0.290779	-0.829696		0.710074	0.888846
YOL047C	LDS2	-1.21759	-0.810966	-2.47393	-3.18442	-1.39593	0.367371	1.02148	1.28688		0.249931	0.00974655		-1.25634	-2.37346		2.41741	0.91951
YGL078C	DBP3	4.83137	4.56377	4.97591	4.80581	4.18428	4.55459	3.92979	3.73335		0.547765	0.00980529		0.144535	0.24204		-0.254489	-0.821235
YLR317W	YLR317W	4.18031	4.488	4.53543	4.83845	5.45976	5.19967	5.82222	6.02392		0.51767	0.00985702		0.355124	0.350447		0.362461	0.824248
YHR056W-A	YHR056W-A	1.37295	2.10098	0.367371	0.15056	1.22033	0.475085	2.48027	2.47249		0.0963134	0.00986527		-1.00558	-1.95042		1.25994	1.9974
YLR259C	HSP60	8.36755	8.39682	8.51278	8.39558	8.82123	8.91313	9.15972	9.27387		0.916765	0.00987532		0.145234	-0.00124184		0.338488	0.360737
YMR099C	YMR099C	5.31433	5.35544	5.42962	5.13258	5.01257	5.09085	4.44162	4.63343		0.830245	0.00994274		0.115282	-0.222862		-0.570952	-0.457422
YOR165W	SEY1	5.88874	5.92813	6.1299	6.15704	5.74012	5.74685	5.37643	5.38819		0.19898	0.00997335		0.241158	0.22891		-0.363689	-0.358661
YFL038C	YPT1	7.63343	7.61625	7.68025	7.4203	7.45063	7.82228	7.28225	7.16972		0.649671	0.010025		0.0468228	-0.195958		-0.168379	-0.652559
YJL121C	RPE1	6.29186	6.15097	6.30998	6.49474	6.25285	6.33949	5.78398	5.94673		0.560397	0.0100806		0.0181151	0.34377		-0.468874	-0.392763
YOR110W	TFC7	3.40327	3.48414	3.58496	3.39369	3.54102	3.52732	3.00899	2.7845		0.985853	0.0103001		0.181695	-0.0904474		-0.53203	-0.742817
YGL209W	MIG2	4.04701	3.79286	4.6011	4.85699	4.9331	5.09845	5.57803	5.3726		1.80728e-05	0.0103423		0.554087	1.06413		0.644932	0.274151
YDR234W	LYS4	5.88044	5.84172	6.0581	6.0376	6.0036	6.28151	6.50144	6.55336		0.403119	0.0104146		0.177659	0.19588		0.497837	0.271848
YMR079W	SEC14	8.05528	7.98567	8.031	7.93587	7.58105	7.50088	7.23113	7.14272		0.748744	0.010507		-0.0242843	-0.049799		-0.349925	-0.358162
YLR430W	SEN1	4.14812	3.95513	4.20555	4.10518	4.09255	4.19771	3.7666	3.80219		0.831525	0.010507		0.0574283	0.150048		-0.325951	-0.395515
YGL096W	TOS8	4.34625	4.12433	3.80735	3.68257	4.47054	4.53792	4.94439	5.13832		0.0305906	0.0106852		-0.538893	-0.441755		0.473853	0.600406
YBL085W	BOI1	3.65306	3.60763	3.75168	3.79701	3.99729	4.10182	3.64847	3.59455		0.716974	0.0106852		0.0986179	0.189387		-0.348827	-0.50727
YPL094C	SEC62	6.92624	6.96324	6.89458	6.98379	7.31488	7.59701	7.09096	7.1234		0.888184	0.0106996		-0.0316614	0.0205488		-0.223918	-0.473612
YML008C	ERG6	7.16631	7.21558	7.28817	7.25427	7.12928	7.50859	6.90893	6.95536		0.901412	0.0108685		0.12186	0.0386913		-0.22035	-0.553228
YPR109W	YPR109W	3.98368	4.28244	4.22342	4.16189	4.33342	4.18824	4.77821	4.86146		0.987384	0.0108719		0.239745	-0.120552		0.444785	0.673217
YIL070C	MAM33	5.64501	5.95396	5.99661	6.01748	4.7148	4.93074	4.26303	4.28318		0.558873	0.0109137		0.351605	0.063513		-0.451761	-0.647556
YLR037C	PAU23	7.20203	7.05311	7.13822	7.22062	9.32127	9.0565	9.60376	9.58265		0.985853	0.0109456		-0.0638053	0.167509		0.282482	0.526148
YJR144W	MGM101	3.83895	3.63227	3.91169	3.34767	3.4957	3.84197	3	2.83794		0.888184	0.0109873		0.0727398	-0.284603		-0.495695	-1.00403
YML009C	MRPL39	8.89288	8.86502	9.05403	8.62443	8.26894	8.44435	7.91277	7.99543		0.884116	0.0110955		0.161158	-0.240592		-0.35617	-0.448924
YDR346C	SVF1	6.97625	6.72656	6.9273	6.77847	6.5373	6.5509	6.16772	6.2151		0.916765	0.0111077		-0.0489452	0.0519127		-0.369577	-0.335805
YKL107W	YKL107W	-0.200913	0.298658	-1.152	-2.55639	-1.68966	-2.64386	0.0565835	0.641546		0.165252	0.0111924		-0.95109	-2.85505		1.74624	3.2854
YNL293W	MSB3	2.54597	2.31615	2.36737	2.05658	2.51602	2.91265	3.25248	3.43563		0.613614	0.0111924		-0.178597	-0.259562		0.736461	0.522979
YPL245W	YPL245W	2.53107	2.47768	2.57289	2.44626	2.99458	2.57773	3.52482	3.45418		0.985853	0.0111924		0.0418202	-0.0314211		0.530236	0.876445
YKL201C	MNN4	3.50716	3.48929	4.13258	3.96532	3.9982	3.48027	3.14241	3.24031		4.27966e-05	0.0112539		0.625416	0.476037		-0.855782	-0.239951
YCR088W	ABP1	6.43912	6.337	6.37816	6.3311	6.22419	6.27575	5.92386	5.87455		0.767317	0.0112798		-0.0609596	-0.00590133		-0.300332	-0.401201
YKL196C	YKT6	7.53138	7.46238	7.28466	7.18289	7.43212	7.42475	7.05441	7.07628		0.0135973	0.0114832		-0.246719	-0.279489		-0.37771	-0.348473
YER009W	NTF2	7.51325	7.69829	7.77531	7.71115	7.24012	6.90316	6.62234	6.56148		0.719858	0.0115355		0.26206	0.0128628		-0.617779	-0.34168
YLR172C	DPH5	6.11936	6.41261	6.28355	6.43996	5.8535	5.88557	5.48639	5.42358		0.916765	0.0115355		0.164195	0.0273433		-0.367104	-0.461996
YAL026C	DRS2	5.20945	5.20438	5.15299	5.16832	5.29352	5.29205	4.96901	4.93357		0.701982	0.0115469		-0.0564588	-0.0360544		-0.324505	-0.358473
YIR018W	YAP5	4.27873	4.22265	4.11103	4.33271	4.69711	4.76447	5.22959	5.26115		0.905336	0.0115967		-0.167697	0.110058		0.532481	0.496681
YER074W	RPS24A	9.20994	8.91474	8.81676	8.77027	8.072	7.82623	7.63249	7.41836		0.0424351	0.0115997		-0.393181	-0.144476		-0.439512	-0.407872
YOL152W	FRE7	2.3978	2.30159	2.39506	2.28096	2.22342	2.17951	1.23266	1.5509		0.962819	0.0117192		-0.00274016	-0.0206313		-0.990762	-0.62861
YDR516C	EMI2	7.65507	7.78143	7.60207	7.63336	6.84699	6.73145	6.41481	6.45861		0.443258	0.011928		-0.0529977	-0.148067		-0.432183	-0.272843
YBR094W	PBY1	4.47249	4.77979	4.78503	4.76713	4.55643	4.44162	4.10266	4.03738		0.757437	0.0120367		0.31254	-0.0126599		-0.453771	-0.404234
YER067W	RGI1	7.10633	6.97166	6.81673	6.84662	5.68173	5.91169	5.33307	5.22458		0.118549	0.0120591		-0.2896	-0.12504		-0.348664	-0.687111
YGL207W	SPT16	5.48864	5.20163	5.37573	5.33664	5.49442	5.45812	4.99232	5.2032		0.936215	0.0121451		-0.112909	0.135007		-0.5021	-0.254918
YJR064W	CCT5	5.58316	5.67666	5.49089	5.36317	5.32876	5.37886	4.93452	4.99095		0.103352	0.0122422		-0.092267	-0.313491		-0.394248	-0.387904
YJR118C	ILM1	6.53683	6.24755	6.71864	6.76593	6.30652	6.15401	5.91456	5.53947		0.0658948	0.0122451		0.181806	0.518385		-0.391953	-0.614539
YKL112W	ABF1	4.42089	4.36036	4.4019	4.55949	4.01078	3.98732	3.61941	3.41414		0.897562	0.012284		-0.0189831	0.199128		-0.391367	-0.573185
YGL021W	ALK1	4.03826	4.40054	4.33128	4.25172	3.60881	4.0798	3.23726	3.37156		0.985853	0.012284		0.293015	-0.148819		-0.371551	-0.708246
YCR034W	ELO2	6.54597	6.64703	6.67624	6.59887	7.15239	6.90388	6.59887	6.67426		0.998939	0.012284		0.130271	-0.0481553		-0.553515	-0.229619
YER020W	GPA2	3.60407	3.56071	3.56438	3.26003	3.30451	3.61941	4.12019	3.9644		0.599321	0.0123514		-0.0396932	-0.300689		0.815675	0.344986
YKR028W	SAP190	5.20555	5.18824	5.28799	5.30012	5.16993	5.47671	4.93263	4.9542		0.836522	0.0123514		0.0824404	0.111881		-0.237297	-0.522509
YJR031C	GEA1	3.92884	3.8166	3.94953	3.9279	3.86295	3.81352	3.33771	3.49825		0.952309	0.012372		0.0206909	0.111297		-0.525236	-0.315274
YOR117W	RPT5	6.1532	6.25191	6.06846	6.16189	6.27966	6.45088	5.96371	6.03474		0.529061	0.0123748		-0.0847415	-0.0900207		-0.315952	-0.416137
YPL250W-A	YPL250W-A	3.06695	4.28021	2.95977	1.16993	3.81762	3.58976	4.37851	4.88704		0.0630592	0.0124206		-0.10718	-3.11029		0.560888	1.29727
YPL118W	MRP51	5.88509	5.96023	6.26228	6.06286	5.31976	5.65992	5.09845	4.95047		0.255269	0.0124489		0.377197	0.102622		-0.221309	-0.709456
YMR317W	YMR317W	5.5744	5.20828	6.09951	5.98185	7.6388	7.31043	7.93275	7.87467		1.08489e-05	0.0126713		0.525101	0.77357		0.293948	0.564243
YPL163C	SVS1	4.33271	4.26679	4.96901	4.904	4.40054	4.37851	3.81352	3.78241		0.000394182	0.0126713		0.636304	0.637216		-0.587013	-0.596103
GTK30D06720	GTK30D06720	3.7666	3.93074	4.31179	4.06953	4.81455	4.82222	4.41819	4.27947		0.219655	0.0126713		0.545199	0.138793		-0.39636	-0.542749
YGL105W	ARC1	7.11207	7.07296	7.08778	7.01033	6.7075	6.79012	6.46254	6.30743		0.719858	0.012702		-0.0242935	-0.062631		-0.244954	-0.482692
YOR052C	TMC1	5.38991	5.56102	5.5552	5.73254	6.30524	6.58316	6.78725	7.04122		0.761038	0.012702		0.165292	0.17152		0.482009	0.458063
YNL282W	POP3	2.98914	2.60881	2.38957	2.22342	2.44095	2.79077	3.89433	3.25852		0.421252	0.0129377		-0.599572	-0.385387		1.45338	0.467747
YLR310C	CDC25	4.56621	4.56377	4.82528	4.77347	4.38059	4.3067	3.99277	3.96162		0.188523	0.0133581		0.259071	0.209701		-0.387823	-0.345076
YLR324W	PEX30	4.43363	4.30816	4.46074	4.26529	4.55029	4.51916	4.90063	5.05961		0.93417	0.0133581		0.0271154	-0.0428701		0.35034	0.54045
YML055W	SPC2	5.05615	5.34412	5.32841	5.06221	4.98185	5.36737	4.76235	4.26078		0.942404	0.013397		0.272256	-0.28191		-0.219504	-1.10659
YLR438W	CAR2	5.27165	5.17513	4.80839	4.87823	3.2032	3.3799	4.19298	3.67129		0.00263732	0.0135924		-0.463265	-0.29689		0.989782	0.291395
YPL169C	MEX67	4.05572	4.14568	4.38267	4.03826	4.26153	4.57773	4.90448	4.84649		0.8374	0.0136346		0.326951	-0.107417		0.642953	0.268762
YJL181W	YJL181W	3.45418	3.50208	3.66334	3.4489	2.93734	2.88557	2.37851	2.16027		0.936215	0.013734		0.209169	-0.053175		-0.558833	-0.7253
YGR195W	SKI6	4.38198	4.41346	4.60822	4.37365	4.24717	4.25776	3.7366	3.49697		0.912927	0.0138638		0.226242	-0.0398105		-0.510563	-0.760791
YIR025W	MND2	1.82375	2.02503	2.35896	1.63691	2.64155	2.81558	3.37573	3.46597		0.952389	0.0138638		0.535209	-0.388114		0.734189	0.650399
YIR037W	HYR1	5.81429	6.17672	6.19357	5.90207	5.97934	5.76977	5.22959	5.46369		0.985853	0.0140489		0.379281	-0.274648		-0.749752	-0.306084
YEL052W	AFG1	4.78503	5.02857	5.22381	4.93216	4.4957	4.83693	4.15218	4.22574		0.660872	0.0140571		0.438781	-0.0964135		-0.343512	-0.611196
YLR205C	HMX1	-1	-1.152	0.226509	-0.251539	-0.713119	-0.0740006	2.43563	0.238787		0.459598	0.014217		1.22651	0.900464		3.14875	0.312787
YGL135W	RPL1B	5.854	6.1914	6.30104	6.25039	5.46369	5.40701	5.06264	4.7703		0.41746	0.0142524		0.447043	0.0589884		-0.401048	-0.636712
YDR525W-A	SNA2	6.78136	6.88032	6.94474	7.04461	6.15603	5.65163	6.39797	6.7974		0.708211	0.0142524		0.163382	0.164294		0.241942	1.14578
YGR116W	SPT6	4.45352	4.35473	4.50906	4.41278	4.14649	4.37156	3.9607	3.76447		0.971653	0.0143532		0.0555448	0.0580473		-0.185795	-0.607085
GTK30H00110	GTK30H00110	3.851	3.83289	4.03562	4.18745	4.91313	4.79961	5.48123	5.13463		0.321961	0.0143592		0.184625	0.354561		0.568106	0.335026
YER094C	PUP3	7.1333	7.26866	6.9806	6.97522	7.22853	7.39558	6.93499	6.96775		0.0587789	0.014447		-0.1527	-0.293441		-0.293542	-0.427832
YDR264C	AKR1	5.97705	6.0009	5.98732	5.95884	6.0766	6.00607	6.4545	6.33735		0.8374	0.014447		0.01027	-0.0420587		0.377903	0.331281
YIR013C	GAT4	-1.18442	-1.35845	-1.39593	-1.18442	1.46989	2.17951	3.28244	2.98368		0.985853	0.014447		-0.211504	0.174029		1.81255	0.804167
YNL157W	IGO1	6.32211	6.55428	6.36877	6.20261	6.49362	6.80142	6.97166	7.23218		0.404804	0.0145026		0.0466599	-0.351668		0.478043	0.430764
YPL266W	DIM1	4.56803	4.78607	4.42761	4.51096	4.07211	4.32265	3.64616	3.59694		0.319769	0.0147168		-0.140426	-0.275112		-0.425943	-0.725714
YGR149W	YGR149W	4.24489	4.20555	4.23036	4.26978	4.83693	4.40939	5.17073	5.15097		0.985853	0.0148604		-0.0145303	0.0642323		0.333792	0.741575
YPL189C-A	COA2	2.63691	2.79286	2.89724	2.64386	1.07039	2.3505	3.81558	2.95791		0.985853	0.0150656		0.260326	-0.148999		2.74519	0.607417
YOR207C	RET1	4.74578	4.67243	4.89385	4.83946	4.90977	4.95373	5.30086	5.27053		0.547765	0.0150889		0.148072	0.16703		0.391083	0.316798
YLR338W	OPI9	-0.0892673	-0.577767	-1.02915	-0.415037	0.604071	-0.184425	1.29278	2.04264		0.862378	0.0151174		-0.939879	0.16273		0.68871	2.22707
YLR131C	ACE2	3.14405	3	3.2765	3.0197	2.97085	3.21101	2.60644	2.43829		0.931199	0.0151514		0.13245	0.0197019		-0.364411	-0.772719
YBR097W	VPS15	3.32048	3.01614	3.45681	3.47897	3.42895	3.20477	2.73985	2.95233		0.201733	0.0153161		0.136321	0.462832		-0.689098	-0.252433
YMR083W	ADH3	8.26725	8.26097	8.37469	8.37217	7.66732	7.4818	7.17832	7.26922		0.762845	0.0155116		0.107437	0.111202		-0.489008	-0.212579
YJL062W-A	COA3	6.96324	7.20916	6.84046	6.99797	7.15775	7.03265	7.45713	7.64443		0.395184	0.0155201		-0.12278	-0.211191		0.299383	0.611781
YML126C	ERG13	7.74645	7.69829	7.615	7.70259	7.62724	7.57947	7.32238	7.25399		0.622754	0.0155329		-0.131443	0.00430034		-0.304863	-0.325478
YOR116C	RPO31	6.30451	6.15543	6.18388	6.17133	5.88118	6.02614	5.65306	5.6314		0.675654	0.0155329		-0.120628	0.0159015		-0.228115	-0.394741
YDR304C	CPR5	7.75682	7.82063	7.79688	7.63379	7.49281	7.45894	7.17243	7.07895		0.604867	0.0155337		0.0400601	-0.186831		-0.320387	-0.379988
YAL054C	ACS1	6.36001	6.13093	6.65263	6.67511	6.142	6.22978	6.5529	6.49089		0.00368919	0.0156193		0.292617	0.544179		0.410895	0.261111
YGR026W	YGR026W	4.92552	5.07082	5.21568	5.03694	4.62117	4.90256	4.0054	4.36177		0.813643	0.0156325		0.290154	-0.0338758		-0.615773	-0.540788
YBR284W	YBR284W	1.83188	1.79909	2.05658	1.99277	2.9542	2.71149	3.51475	3.28392		0.74987	0.0157328		0.224706	0.193681		0.560557	0.572427
YDR143C	SAN1	5.24527	5.12846	5.49281	5.37226	4.93687	5.01525	4.50335	4.64212		0.193965	0.0158536		0.247547	0.243797		-0.433525	-0.373124
YDR276C	PMP3	9.3328	9.66608	9.16659	8.80555	9.41003	9.82153	9.92409	10.1837		0.000938339	0.0158862		-0.166208	-0.860532		0.514058	0.36215
YDR410C	STE14	5.12433	5.04832	5.17792	5.19377	5.80219	5.66363	6.09043	6.26791		0.894342	0.0158968		0.0535897	0.145448		0.288237	0.604281
YLR347W-A	YLR347W-A	4.99865	5.31107	3.45022	3.0054	3.36317	3.79701	4.59216	4.88996		1.094e-05	0.0158972		-1.54843	-2.30567		1.22899	1.09295
YNL002C	RLP7	6.06501	6.15462	6.34465	6.11686	5.54071	5.89748	5.35544	5.19022		0.761087	0.0159503		0.279639	-0.0377519		-0.18527	-0.707263
YML017W	PSP2	4.31904	4.41549	4.68874	4.57652	4.29425	4.46532	3.91456	3.94767		0.246621	0.0160871		0.3697	0.161034		-0.379689	-0.517655
GTK30H00130	GTK30H00130	5.50271	5.23764	5.5043	5.12557	6.6744	6.3966	7.19682	6.96959		0.932866	0.016089		0.0015901	-0.112072		0.522419	0.572983
YML029W	USA1	5.10182	4.83895	5.09508	5.24869	5.12846	5.1631	4.7761	4.80012		0.48476	0.0161636		-0.00673764	0.409735		-0.352354	-0.362973
YBR231C	SWC5	1.4957	1.58015	2.25096	1.41143	1.15704	1.57531	2.31325	2.45154		0.748517	0.0161724		0.755266	-0.168719		1.1562	0.876229
YGR110W	CLD1	-2.05889	-2.25154	-1.25154	-3.05889	-2.18442	-1.152	0.411426	0.111031		0.952055	0.0161724		0.807355	-0.807355		2.59585	1.26303
YNL186W	UBP10	4.28836	4.42156	4.30159	4.47638	4.16832	4.48478	3.94017	3.82883		0.985853	0.0161724		0.0132291	0.0548217		-0.228154	-0.655948
YLR323C	CWC24	3.08066	3.55827	3.43029	3.01436	3.50335	3.58376	3.9607	4.48993		0.865498	0.0162328		0.349628	-0.543912		0.457348	0.906168
YDL210W	UGA4	1.7137	2.0036	2.14078	1.67807	2.68257	2.70044	3.20945	3.35191		0.985853	0.0162525		0.427083	-0.32553		0.52688	0.651471
GTK30L00140	GTK30L00140	2.04614	2.51602	2.43029	2.63691	1.8953	2.48285	3.09255	3.15866		0.868458	0.0164221		0.384143	0.120899		1.19724	0.675812
YPR187W	RPO26	5.13258	5.52356	5.39985	5.27389	4.57652	5.24869	4.30159	4.10266		0.94016	0.0166337		0.267278	-0.249673		-0.274934	-1.14603
YKL067W	YNK1	8.38879	8.61257	8.4068	8.31633	8.15826	8.49073	8.72458	8.68331		0.335711	0.0167312		0.018008	-0.296247		0.566326	0.19258
YKL062W	MSN4	6.57864	6.43979	6.85786	6.85761	6.30506	6.08661	5.83643	5.82426		0.0135973	0.0167976		0.27922	0.417818		-0.468629	-0.262355
GTK30H02760	GTK30H02760	2.86196	2.72683	2.80735	2.67129	3.24336	3.32193	2.40327	2.73118		0.916765	0.0169248		-0.0546004	-0.0555378		-0.840097	-0.590745
YDL192W	ARF1	9.11442	9.16443	8.84351	8.7238	8.68184	9.0492	8.53636	8.48442		0.000362273	0.0172807		-0.270906	-0.440632		-0.145472	-0.564775
YOL112W	MSB4	2.90881	2.92029	2.55336	3.14568	2.67129	2.81558	3.54967	3.19061		0.916765	0.017465		-0.355452	0.225384		0.878376	0.375039
YLR231C	BNA5	4.40327	4.46793	5.13258	5.24717	4.58916	4.5735	4.25852	3.8953		4.82758e-08	0.017541		0.729309	0.779236		-0.330645	-0.678193
YBL001C	ECM15	7.27463	7.28374	7.20633	7.28549	6.59529	6.7765	6.32535	6.08534		0.800733	0.0175519		-0.0683038	0.00175809		-0.269944	-0.691159
YBR301W	PAU24	5.73363	5.93734	6.2267	6.3565	7.67645	7.4641	8.0027	7.95216		0.040336	0.0176041		0.493076	0.419152		0.326252	0.488062
YNL010W	YNL010W	7.00921	6.89966	6.76115	6.76964	6.32391	6.12081	5.94392	5.51885		0.115477	0.0176041		-0.248061	-0.13002		-0.379989	-0.601958
YOR023C	AHC1	4.17552	4.02503	4.28688	4.26978	4.71973	4.54905	5.13463	5.00225		0.611896	0.0176109		0.111357	0.244752		0.414901	0.453199
YMR049C	ERB1	4.40054	4.42962	4.46467	4.54905	3.84398	4.18349	3.55582	3.55336		0.889695	0.0176436		0.0641303	0.119437		-0.288168	-0.630126
YPR162C	ORC4	3.21878	3.43696	3.43829	3.48285	3.36597	3.40871	3.95233	3.86394		0.880506	0.0178221		0.219512	0.0458869		0.586361	0.455227
YLR409C	UTP21	4.53792	4.42828	4.36947	4.19298	4.15785	3.98459	3.60526	3.68145		0.157809	0.0179674		-0.168451	-0.235293		-0.552595	-0.30314
YGL058W	RAD6	4.77873	4.75382	4.54535	4.68313	5.25663	5.8475	6.06932	6.18844		0.611383	0.0180597		-0.233384	-0.0706835		0.812682	0.340945
YCR008W	SAT4	6.37452	6.32607	6.51175	6.472	6.63532	6.81519	6.39077	6.41583		0.620122	0.0181498		0.137235	0.14593		-0.244548	-0.399365
YMR312W	ELP6	4.64789	4.68201	4.82273	4.9486	5.02104	4.96301	5.39746	5.51665		0.550534	0.0186165		0.17484	0.266589		0.376425	0.553634
YBR039W	ATP3	7.33217	7.29893	7.78274	7.65256	6.4545	6.57803	6.25663	6.01346		0.00156345	0.0188146		0.450565	0.353625		-0.197872	-0.564571
YMR032W	HOF1	2	2.19219	2.17951	1.9782	2.16027	2.3505	1.32193	1.7137		0.952055	0.0188146		0.179511	-0.213999		-0.838347	-0.636801
YNL123W	NMA111	4.39369	4.32841	4.39643	4.41819	4.68201	4.88362	5.17513	5.12557		0.985853	0.0188472		0.00274277	0.0897843		0.493114	0.241948
YGR098C	ESP1	4.0018	3.80632	3.99277	3.98459	3.7666	3.7939	3.46205	3.34908		0.901534	0.0190539		-0.00903381	0.178265		-0.304543	-0.444814
YDR262W	YDR262W	4.81301	4.8535	5.41853	5.49185	5.34163	5.45352	5.77004	5.87553		7.24822e-05	0.0191436		0.605516	0.638356		0.428406	0.422017
YAR071W	PHO11	2.3978	2.51602	2.72028	2.46728	2.65535	3.10266	2.27501	2.04264		0.896507	0.0192479		0.322476	-0.0487357		-0.380345	-1.06001
YCL028W	RNQ1	6.52748	6.49601	6.44062	6.42626	6.41583	6.23189	5.99865	5.90857		0.53294	0.0192813		-0.086857	-0.0697501		-0.417179	-0.32332
YHL019W-A	YHL019W-A	0.704872	0.536053	-2.05889	-0.286304	0.963474	1.02148	2.0321	2.50843		0.228025	0.0193069		-2.76377	-0.822357		1.06863	1.48695
YLR186W	EMG1	4.86096	5.18943	5.04658	4.93876	4.8505	5.2384	4.55275	4.48929		0.85132	0.0193069		0.185616	-0.250673		-0.297753	-0.749119
YOR260W	GCD1	5.79961	5.79935	5.91886	5.86666	5.47573	5.68594	5.25626	5.17433		0.846056	0.0193766		0.119258	0.0673144		-0.219478	-0.511614
YJL058C	BIT61	2.61353	2.40054	3.01257	2.15704	3.2765	3.19377	3.67807	3.86592		0.905336	0.0194914		0.399037	-0.243494		0.401575	0.672147
YOR372C	NDD1	5.26866	4.99367	5.14608	5.15381	4.78555	4.82782	4.38198	4.42492		0.964825	0.0196461		-0.122574	0.160131		-0.403575	-0.402897
YHR099W	TRA1	5.04614	4.79546	4.88069	4.98413	4.99774	4.74953	4.54967	4.51854		0.942404	0.0198055		-0.165456	0.188678		-0.448075	-0.230999
YLR192C	HCR1	6.23726	6.28965	6.2651	6.18031	5.97476	6.0268	5.69321	5.49633		0.765328	0.0198205		0.0278415	-0.109343		-0.281551	-0.530466
YGL028C	SCW11	5.04264	4.66448	5.1297	4.99639	4.94298	4.98687	4.5656	4.58556		0.54473	0.0198261		0.0870508	0.331906		-0.377386	-0.401302
YPL075W	GCR1	4.76341	4.73823	4.57713	4.68257	4.07724	4.09761	3.76871	3.69711		0.360487	0.0198731		-0.186285	-0.0556541		-0.308529	-0.400504
YMR226C	YMR226C	5.93711	5.96116	5.85025	5.83542	5.62732	5.99073	5.32481	5.41278		0.48476	0.0198911		-0.0868596	-0.125741		-0.302504	-0.577946
YLR087C	CSF1	4.22033	4.07724	4.27053	4.32048	4.25776	4.23573	3.90593	3.94767		0.629789	0.0198911		0.050199	0.243242		-0.351836	-0.288061
YDR071C	PAA1	5.36036	5.82171	5.6401	5.72137	5.67582	6.03826	6.28817	6.34908		0.985853	0.0198911		0.279736	-0.100338		0.612358	0.310822
YLR379W	YLR379W	4.8674	5.50906	3.28096	2.48543	3.488	3.8953	4.3427	4.63633		1.37826e-11	0.0199897		-1.58645	-3.02364		0.854696	0.741032
YER037W	PHM8	1.87578	1.89142	0.918386	1.32769	2.87971	2.17951	3.65191	3.16832		0.180784	0.0200371		-0.957394	-0.563732		0.772207	0.98881
YNL233W	BNI4	3.55582	3.74201	4.05398	3.91934	3.46336	3.86394	3.16993	3.20633		0.104525	0.020178		0.498164	0.177334		-0.293436	-0.657608
YPL176C	TRE1	3.03738	3.48929	3.34056	3.16027	3.32912	3.75809	4.02857	4.05398		0.898726	0.0202171		0.30318	-0.329011		0.699446	0.29589
YNL064C	YDJ1	6.19554	6.44758	6.14445	5.93334	6.83327	7.08714	7.2914	7.32688		0.0445923	0.0202514		-0.0510901	-0.514243		0.458131	0.239734
YGR216C	GPI1	4.20711	3.94953	4.06091	3.98277	4.07039	3.8166	4.40871	4.44029		0.790944	0.0204212		-0.1462	0.0332305		0.338323	0.623688
YPR127W	YPR127W	5.19377	5.09381	5.20359	4.97545	5.18864	5.23381	4.81916	4.75275		0.804951	0.0204829		0.00982097	-0.118367		-0.369481	-0.481063
YLR219W	MSC3	3.50208	3.49697	3.77716	3.57289	4.35685	4.74201	5.09001	4.89627		0.634574	0.0204975		0.275081	0.0759161		0.733158	0.154266
YDL004W	ATP16	8.18626	8.20051	8.52301	8.39819	7.06856	6.97177	6.76752	6.38491		0.10575	0.0205708		0.33675	0.197682		-0.301041	-0.58686
YLL040C	VPS13	4.04614	3.84197	4.10769	4.09424	4.07039	4.05224	3.71039	3.76977		0.602685	0.0206698		0.0615461	0.252263		-0.359996	-0.28247
YGR238C	KEL2	4.11437	3.86493	4.15137	3.97636	4.34837	4.22265	3.851	3.91839		0.936215	0.0207761		0.0370048	0.111435		-0.497375	-0.304264
YGR161C	RTS3	8.46948	8.52728	8.88704	8.97831	9.20914	9.3512	9.59774	9.5837		0.000532662	0.0208636		0.417559	0.451029		0.388599	0.232499
YKR030W	GMH1	6.22516	6.39197	6.25172	6.21218	6.42206	6.17931	6.68678	6.73376		0.603851	0.0209355		0.0265599	-0.179794		0.264716	0.554449
YPR063C	YPR063C	5.7339	5.72083	5.90953	5.90328	6.15239	5.93522	5.67525	5.56163		0.55596	0.021069		0.175637	0.182454		-0.477135	-0.373592
YNR057C	BIO4	1.852	2.26903	2.23573	1.85599	2.60644	2.45681	3.38267	3.27501		0.984623	0.0211244		0.383728	-0.413043		0.776225	0.818201
YDL197C	ASF2	2.46205	2.29572	2.26303	1.9222	3.24336	3.94392	4.19061	4.25248		0.54473	0.0211977		-0.199018	-0.373525		0.94725	0.308555
YKL156W	RPS27A	8.92526	8.83444	8.74987	8.80723	7.94819	7.92041	7.64587	7.43538		0.436961	0.0213079		-0.175388	-0.0272133		-0.302317	-0.485034
YDL185W	VMA1	8.28577	8.09429	8.12065	8.16425	7.80038	7.72635	7.46777	7.45837		0.690226	0.0213366		-0.165119	0.0699644		-0.332614	-0.267989
YOR319W	HSH49	3.75916	4.17871	4.12598	4.01078	4.46858	4.44956	4.91934	5.0691		0.976694	0.0213571		0.366826	-0.167935		0.450757	0.619539
YBR149W	ARA1	6.95373	7.19269	6.9305	7.02702	6.7366	6.64328	6.33217	6.36089		0.544706	0.0213722		-0.02323	-0.165666		-0.404434	-0.282388
YJL095W	BCK1	3.91934	3.87283	4.08151	4.03562	4.1177	4.15218	3.77083	3.79181		0.549707	0.0213722		0.16217	0.162795		-0.346866	-0.360369
YLR222C	UTP13	4.7137	4.65592	4.78241	4.64962	4.2854	4.53045	4.11686	3.84298		0.985853	0.0214113		0.0687128	-0.00630875		-0.168538	-0.687467
YJR091C	JSN1	4.93357	4.61941	5.02459	5.07895	5.20633	5.21723	5.58616	5.50653		0.210378	0.021593		0.091013	0.459538		0.379834	0.289295
YNL275W	BOR1	3.93074	3.61706	3.58256	3.72901	4.39985	4.57168	4.8485	4.94251		0.643646	0.0216762		-0.348181	0.111946		0.448643	0.370838
YLR093C	NYV1	3.67016	3.7366	3.86592	3.48285	3.851	4.37573	4.59753	4.69209		0.936215	0.0216859		0.195758	-0.253757		0.746532	0.316358
YDR324C	UTP4	4.51916	4.40871	4.60585	4.26379	3.90689	3.90785	3.46467	3.48285		0.897098	0.0217362		0.0866854	-0.144926		-0.442222	-0.425004
YBR114W	RAD16	2.36737	2.59694	2.32769	2.37295	2.74846	3.11103	3.56071	3.36457		0.668508	0.021827		-0.0396837	-0.223983		0.812254	0.253541
YDR189W	SLY1	4.95652	4.74524	5.01257	4.65076	4.92125	4.81301	4.48091	4.48156		0.91981	0.0221087		0.0560473	-0.0944728		-0.440335	-0.331454
GTK30J00200	GTK30J00200	5.17712	4.99413	5.31651	5.33985	5.38785	5.38094	5.66789	5.82579		0.249916	0.0221499		0.139387	0.345723		0.280047	0.444848
YMR067C	UBX4	4.23189	3.98459	4.06091	3.94298	4.10098	4.33985	3.5097	3.848		0.683664	0.0221499		-0.170981	-0.0416058		-0.591282	-0.491853
YGL116W	CDC20	3.71918	3.70044	3.83794	3.54102	3.24793	3.83086	2.97453	2.9486		0.9303	0.0221813		0.11876	-0.159421		-0.273398	-0.882263
YFR039C	OSW7	4.20789	4.26228	4.14812	4.08576	4.88362	4.82426	5.22458	5.27836		0.550088	0.0222563		-0.0597722	-0.176518		0.34096	0.454098
YJR033C	RAV1	4.1102	4.04614	4.19613	4.22419	4.13668	4.21335	3.71809	3.88753		0.701239	0.0222563		0.0859387	0.178053		-0.418596	-0.325822
YLR367W	RPS22B	6.37678	6.37799	6.44609	6.54967	6.04876	6.18388	5.78346	5.58826		0.790944	0.0223065		0.0693142	0.171678		-0.265303	-0.595619
YJL157C	FAR1	4.86394	4.92315	5.06867	5.04177	4.88509	5.06652	4.60229	4.63459		0.553991	0.0223104		0.204732	0.118619		-0.282796	-0.431927
YBL063W	KIP1	2.42223	2.4489	2.18269	2.20163	1.9855	2.28688	1.5656	1.53107		0.275086	0.0223644		-0.239541	-0.247267		-0.419903	-0.755812
YLL012W	YEH1	2.86592	2.85798	2.60881	2.79701	2.62059	3.02503	3.37016	3.43696		0.625661	0.0224307		-0.25711	-0.060968		0.749578	0.411933
YER133W	GLC7	6.51901	6.71218	6.81967	6.52246	6.33878	6.53652	6.04155	6.11603		0.981164	0.0224307		0.300661	-0.189719		-0.297231	-0.420487
YLR059C	REX2	5.31288	5.53138	5.40531	5.35438	5.01837	5.32301	4.82731	4.50016		0.793563	0.0224858		0.0924287	-0.177		-0.191056	-0.822845
YPL116W	HOS3	4.71644	4.51665	4.69098	4.74362	4.39643	4.27053	3.96532	3.852		0.868458	0.0227656		-0.0254665	0.226977		-0.431111	-0.41853
YNL216W	RAP1	5.23726	5.08151	5.07596	5.13258	4.59156	4.72629	4.37365	4.16993		0.69062	0.0228703		-0.161297	0.0510668		-0.217912	-0.556361
YGR103W	NOP7	5.20984	5.2075	5.42391	5.21956	4.84398	5.39985	4.7447	4.58316		0.777289	0.0229424		0.214071	0.0120533		-0.0992845	-0.816697
YMR152W	YIM1	3.55213	3.95884	4.0072	3.9222	3.47249	3.36457	2.854	2.72028		0.748517	0.023026		0.455064	-0.0366448		-0.618492	-0.644294
YJL034W	KAR2	8.96613	8.90923	8.76895	8.7785	10.1314	10.1972	10.4532	10.5123		0.0963134	0.0230857		-0.197185	-0.130729		0.321802	0.315129
YEL041W	YEF1	3.46336	3.28392	3.5097	3.51223	4.09255	4.45878	4.75435	4.73823		0.836695	0.0230857		0.046335	0.228305		0.661807	0.279452
YPL114W	YPL114W	1.7866	1.91073	2	0.941106	3.05137	3.16672	3.79494	4.07468		0.851729	0.023321		0.213404	-0.969626		0.743564	0.907961
YMR001C	CDC5	4.21878	4.41143	4.32048	4.20085	3.853	4.10685	3.52857	3.5472		0.74987	0.0234451		0.101704	-0.210577		-0.324426	-0.559648
YML086C	ALO1	4.78607	4.76713	4.45812	4.30232	4.61412	4.52857	4.15543	4.1375		0.0023876	0.0235213		-0.327954	-0.464806		-0.458695	-0.391068
YOL122C	SMF1	5.67723	5.53978	5.91337	5.84071	5.73227	5.86962	6.20222	6.09276		0.116651	0.0235213		0.236142	0.300936		0.469953	0.223132
YOL103W	ITR2	4.83845	4.76288	4.77926	4.65821	4.84298	5.20124	4.62994	4.69042		0.549373	0.0235213		-0.0591879	-0.104669		-0.213039	-0.510825
YMR138W	CIN4	2.16027	3.20477	2.48543	2.62527	3.22033	2.52607	3.78346	3.74416		0.802438	0.0235213		0.325152	-0.579496		0.563127	1.21809
YIL086C	YIL086C	3.22959	2.21412	2.31904	2.38681	3.71589	2.77189	4.06781	4.6427		0.665779	0.0235539		-0.910548	0.172686		0.351917	1.87082
YLR350W	ORM2	6.34163	6.26566	6.45648	6.60496	7.1534	6.98812	7.47444	7.40693		0.352146	0.0236023		0.114848	0.339299		0.321036	0.418811
YIR032C	DAL3	0.454176	0.773996	0.933573	1.59455	2.62527	2.12433	3.18428	3.41549		0.633842	0.0236095		0.479397	0.820552		0.55901	1.29116
YLR077W	FMP25	5.8505	5.71012	5.69794	5.57592	5.61971	5.61147	5.21878	5.3194		0.289999	0.0236256		-0.152559	-0.1342		-0.400925	-0.292066
YLR299W	ECM38	3.99186	3.8268	3.87774	3.80116	4.17552	4.12267	4.57531	4.54597		0.744693	0.0236281		-0.114118	-0.025644		0.399788	0.423296
YLR295C	ATP14	7.49073	7.60874	7.68832	7.6094	6.17652	6.31524	5.897	5.64875		0.851729	0.0236814		0.19759	0.000665058		-0.279524	-0.666487
YIL105C	SLM1	2.87971	2.96717	2.79701	2.83996	3.27352	3.6241	3.89627	3.98277		0.706304	0.0237124		-0.0826928	-0.127209		0.622756	0.358665
YMR038C	CCS1	6.89627	7.12805	6.95268	6.88667	7.23869	7.27826	6.8107	7.00977		0.531016	0.0237804		0.0564112	-0.241374		-0.427991	-0.268491
YOR234C	RPL33B	6.02459	6.36807	6.16852	5.88923	5.39985	5.66107	4.88313	5.1152		0.477065	0.0238347		0.143936	-0.47884		-0.516723	-0.545866
YDR224C	HTB1	7.20114	7.32364	7.38379	7.46899	6.64371	6.44012	6.16912	6.01279		0.609425	0.0238555		0.182647	0.14535		-0.474589	-0.42733
YBL043W	ECM13	-0.268817	-0.104697	-0.473931	0.321928	-1.4344	-0.0439433	2.26604	-0.268817		0.985853	0.02423		-0.205114	0.426625		3.70044	-0.224873
YJL197W	UBP12	3.88655	3.82171	3.83289	3.851	3.84097	3.74201	3.37295	3.43429		0.880486	0.024281		-0.0536601	0.0292892		-0.468015	-0.307712
YOL076W	MDM20	4.10685	4.01346	4.09677	4.32265	4.88166	5.25172	5.47541	5.44559		0.721798	0.0243065		-0.0100829	0.309187		0.593745	0.193875
YJL195C	YJL195C	0.201634	0.298658	0.678072	-0.120294	0.31034	1.10434	2.34199	1.68257		0.985853	0.0243389		0.476438	-0.418953		2.03165	0.578237
YBR133C	HSL7	4.90689	4.58376	4.78293	4.79649	4.68986	4.72629	5.05788	5.07339		0.995518	0.0243821		-0.123958	0.212734		0.368025	0.347106
YOL043C	NTG2	2.63227	2.59216	2.67129	2.79286	2.26903	2.6017	3.26754	3.0036		0.928791	0.0244264		0.0390252	0.200697		0.998503	0.401906
YNL067W	RPL9B	7.39678	7.60251	7.54179	7.71569	7.33002	7.02956	6.71603	6.84937		0.777289	0.0244993		0.145018	0.113174		-0.61399	-0.180189
YCR013C	YCR013C	6.34837	7.02004	4.40531	3.9514	4.46989	5.44361	4.26604	4.29352		2.90612e-30	0.0246139		-1.94306	-3.06863		-0.203849	-1.15009
YBL081W	YBL081W	5.3844	5.20867	5.86592	5.77873	5.81558	5.72	5.39266	5.3978		0.000118117	0.024791		0.481524	0.570061		-0.422915	-0.322202
YAR007C	RFA1	3.49825	3.69153	3.69933	3.78346	3.37016	3.31325	2.99639	2.52857		0.809402	0.024806		0.201079	0.0919225		-0.373776	-0.784675
YJR020W	YJR020W	1.75702	2.87381	1.07039	0.956057	2.12433	2.85798	4.0045	3.27202		0.0857797	0.0248443		-0.686634	-1.91776		1.88017	0.414042
YDR320C	SWA2	4.36527	4.42761	4.56071	4.62819	4.49953	4.51349	4.18824	4.02414		0.48476	0.0248625		0.195442	0.200584		-0.311284	-0.489348
YNL279W	PRM1	-0.0439433	0.298658	0.176323	0.189034	1.02857	1.73985	2.24184	2.15381		0.993002	0.0248625		0.220266	-0.109624		1.21327	0.413957
YGL013C	PDR1	3.55827	3.46467	3.79494	3.65992	4.26303	4.13504	4.56438	4.59694		0.417405	0.0249391		0.236668	0.195256		0.301344	0.461893
YOR264W	DSE3	3.06005	3.3978	3.7126	3.26754	3.07211	3.55827	2.46205	2.82579		0.616455	0.0249562		0.652548	-0.130267		-0.610053	-0.732482
YGL257C	MNT2	3.67469	3.60288	3.69488	3.61353	3.77189	3.47897	4.07039	4.20242		0.984623	0.0249805		0.0201936	0.0106472		0.298504	0.723446
YNR075W	COS10	7.77992	7.70798	7.86208	7.82311	8.76865	8.35883	8.95913	9.02287		0.829535	0.0251061		0.0821631	0.115132		0.190485	0.66404
YDL140C	RPO21	6.73823	6.59634	6.75796	6.73931	6.24375	6.21082	5.9514	5.92979		0.897098	0.0251327		0.0197292	0.142969		-0.292344	-0.281026
YLR153C	ACS2	7.65485	7.51822	7.50875	7.56461	7.50168	7.40497	7.19121	7.12247		0.68667	0.0251707		-0.146105	0.0463864		-0.310471	-0.282506
YBR143C	SUP45	7.20212	7.14078	7.04341	7.10119	6.62147	6.48961	6.27854	6.14934		0.445098	0.0254102		-0.158714	-0.0395908		-0.342923	-0.340266
YNL257C	SIP3	3.49825	3.33771	3.41007	3.54226	3.36457	3.49057	2.98185	3.04963		0.985853	0.0259102		-0.0881812	0.204547		-0.38272	-0.440939
YNL195C	YNL195C	1.03562	1.93734	1.90304	1.88753	2.51602	2.47508	3.17951	3.32625		0.807813	0.0259192		0.867414	-0.0498191		0.663496	0.851165
YOL115W	PAP2	3.69265	3.70929	3.71918	3.67807	3.80426	4.15947	3.46858	3.54102		0.936215	0.0262193		0.0265331	-0.0312187		-0.335677	-0.618449
YPR126C	YPR126C	0.641546	0.475085	-0.136062	0.0703893	0.495695	-0.0291463	2.23879	2.05658		0.821968	0.0264108		-0.777608	-0.404696		1.74309	2.08573
YIL050W	PCL7	3.88947	3.74201	4.01525	4.2502	3.77505	3.73985	3.14893	3.13914		0.431158	0.026429		0.125774	0.508197		-0.626116	-0.600706
YLR086W	SMC4	3.1635	3.20163	3.43296	3.33056	3.37712	3.70044	3.14078	3.13093		0.472442	0.0264615		0.269461	0.128925		-0.236345	-0.569509
YBR195C	MSI1	3.57531	3.3147	3.75168	3.48671	3.45549	3.23113	2.75702	2.72028		0.748744	0.0265135		0.176366	0.172018		-0.698468	-0.510847
YCL057W	PRD1	6.9279	6.9743	7.09982	7.03067	6.97396	6.95187	6.67412	6.66959		0.754504	0.0265352		0.171925	0.0563673		-0.299834	-0.282274
YCL063W	VAC17	4.4121	4.48929	4.47638	4.63923	4.20085	4.47897	4.00809	3.6241		0.888184	0.0265352		0.0642776	0.149946		-0.192757	-0.854871
YOR210W	RPB10	7.26838	7.15147	7.07532	7.12567	6.90497	6.81468	6.57016	5.9521		0.568303	0.0266423		-0.19306	-0.0258015		-0.334806	-0.862578
YLR212C	TUB4	4.30012	4.41278	4.14893	4.21179	3.76235	3.60881	2.99458	3.28244		0.348114	0.0266504		-0.15119	-0.200991		-0.767769	-0.326369
YOR019W	YOR019W	1.09085	1.73985	1.1177	1.19535	2.14731	2.64616	2.91265	3.08916		0.611498	0.0266547		0.0268416	-0.544501		0.765343	0.442996
YJR143C	PMT4	6.1373	5.98618	6.08767	6.02326	6.3087	6.10538	5.90665	5.84474		0.888184	0.0267		-0.0496236	0.037072		-0.402053	-0.260648
YJL052W	TDH1	12.1269	12.0151	11.6799	11.8123	11.0051	10.9062	10.638	10.668		0.000581088	0.0267434		-0.447018	-0.202821		-0.367023	-0.238255
YDR524C-B	YDR524C-B	12.5014	12.0019	12.36	12.37	11.8827	11.5696	12.1516	12.0724		0.912927	0.0270118		-0.141355	0.368152		0.268936	0.502832
YHL034C	SBP1	6.41768	6.7807	6.56255	6.2854	5.61471	6.06178	5.48027	5.33414		0.377269	0.0270219		0.144864	-0.495302		-0.134445	-0.727637
YJL044C	GYP6	5.41515	5.49921	5.36142	5.22226	5.61706	5.80916	5.30415	5.4019		0.257629	0.0270756		-0.0537327	-0.276944		-0.312917	-0.407254
YGR244C	LSC2	6.6499	6.78411	6.65435	6.56682	5.92529	5.84373	5.56742	5.49474		0.43637	0.0271335		0.00444679	-0.217296		-0.357864	-0.348997
YKL122C	SRP21	5.62029	5.63894	5.77531	5.92172	5.24755	5.61677	4.8535	4.9814		0.524698	0.0271335		0.155021	0.282779		-0.394051	-0.635373
YBR078W	ECM33	8.69492	8.41692	8.4654	8.48744	9.2854	8.87747	9.47942	9.53697		0.589582	0.0271335		-0.229512	0.0705139		0.194014	0.659498
YGR204W	ADE3	7.56415	7.47265	7.58429	7.5694	7.39549	7.49993	7.70377	7.79409		0.967755	0.0271335		0.0201366	0.0967497		0.308274	0.294165
YGL162W	SUT1	6.21723	6.36247	6.84812	6.6879	5.8301	5.59783	5.16189	5.39815		0.000343616	0.0271567		0.630891	0.325431		-0.668215	-0.199684
YBL047C	EDE1	6.94064	6.72833	6.97453	6.99345	7.31985	7.37929	7.1266	7.07243		0.630103	0.0274194		0.0338927	0.265119		-0.193251	-0.306864
YPL225W	YPL225W	6.19712	6.142	6.07382	6.28003	5.61471	6.0813	5.30925	5.36492		0.952055	0.0275035		-0.123298	0.138023		-0.305461	-0.716374
YBR241C	YBR241C	3.65764	3.63459	3.60051	3.44758	3.92884	4.07553	4.37504	4.53169		0.645829	0.0275948		-0.0571324	-0.187014		0.446195	0.456161
YPL010W	RET3	6.83403	6.66135	6.80864	6.70943	6.45171	6.4261	6.12681	5.98185		0.952626	0.0276126		-0.0253861	0.0480779		-0.324898	-0.444244
YLR040C	AFB1	2.57531	1.852	3.19061	3.10769	2.6893	2.96717	3.52482	3.60288		0.0505739	0.027716		0.615303	1.25569		0.835517	0.635716
YIL055C	YIL055C	3.09424	3.19219	3.37016	3.39917	3.27798	3.55704	3.87774	3.90881		0.524482	0.0278431		0.275928	0.206977		0.59976	0.35177
YIL094C	LYS12	6.9863	6.89276	7.13443	7.18567	6.80439	6.55949	6.35966	6.29517		0.268609	0.0278693		0.148129	0.292913		-0.444727	-0.26432
YOR378W	AMF1	0.9855	0.887525	0.62293	0.831877	0.669027	0.807355	1.59932	1.68706		0.809878	0.0278693		-0.36257	-0.055648		0.930291	0.879706
YBL057C	PTH2	5.1152	5.00225	5.36177	5.32048	5.51001	6.02636	6.2804	6.2267		0.311344	0.0280908		0.246569	0.318232		0.770387	0.200344
YKL147C	YKL147C	-0.37707	-0.535332	-0.152003	-1.94342	-2.12029	-2.05889	0.863938	0.0426443		0.921629	0.0281038		0.225067	-1.40808		2.98423	2.10154
YMR183C	SSO2	5.12102	5.39849	5.02945	5.23573	5.07938	5.49729	4.83036	4.83845		0.549858	0.0282735		-0.0915625	-0.16276		-0.249021	-0.658845
YDR400W	URH1	5.04832	5.08534	4.96347	4.81455	4.9982	4.79649	4.38612	4.60585		0.183483	0.0282772		-0.0848493	-0.270789		-0.612074	-0.190644
YPL076W	GPI2	4.45681	4.11853	4.64962	4.52419	4.8953	4.70708	5.24184	5.28947		0.372473	0.0282772		0.192809	0.405663		0.346538	0.582383
YLR429W	CRN1	5.84825	5.8627	5.80245	5.7845	6.34731	6.25569	6.01279	5.96532		0.612594	0.0284543		-0.0457956	-0.0781954		-0.334519	-0.290367
YJL063C	MRPL8	4.30451	4.60999	4.57531	4.3427	4.08661	3.87971	3.37712	3.33485		0.954542	0.0285794		0.270801	-0.267294		-0.70949	-0.544851
YJR109C	CPA2	4.86542	4.87627	5.47703	5.41346	4.81813	4.64789	4.41075	4.35473		1.03169e-07	0.0285975		0.611606	0.537187		-0.407387	-0.293156
YLR120W-A	YLR120W-A	4.74578	4.39985	2.45681	2.24793	4.31542	4.88606	5.79597	5.3572		0.00105057	0.0285975		-2.28897	-2.15193		1.48055	0.471138
YMR155W	YMR155W	3.9782	3.65191	3.97911	3.72028	3.62644	3.85699	4.15623	4.24641		0.998449	0.0285975		0.000915125	0.0683657		0.529796	0.389422
YLR237W	THI7	5.13011	4.97957	5.17712	5.13627	5.04832	5.10476	5.52199	5.3572		0.8374	0.0287108		0.0470133	0.156705		0.47367	0.252444
YIL124W	AYR1	5.55459	5.82858	5.66192	5.45154	5.393	5.01748	4.69488	4.76341		0.486579	0.0289367		0.107332	-0.37704		-0.698124	-0.254065
YGR255C	COQ6	6.07724	6.04396	6.01592	6.02481	6.07211	5.86096	5.51602	5.67976		0.734774	0.0291656		-0.0613262	-0.0191496		-0.556091	-0.181201
YLR229C	CDC42	6.22689	6.18507	6.3658	6.0798	5.88679	6.18567	5.53543	5.67497		0.985853	0.0291968		0.138904	-0.105269		-0.351363	-0.510699
YPL093W	NOG1	6.51175	6.51412	6.50271	6.41481	6.01703	6.28762	5.78947	5.85773		0.664604	0.0293549		-0.00904017	-0.0993102		-0.227563	-0.429888
YNL039W	BDP1	3.33628	3.03562	3.36177	2.9782	3.27352	3.14893	2.64616	2.71809		0.967755	0.0294879		0.025485	-0.0574283		-0.627353	-0.430847
YKL101W	HSL1	3.48929	3.5509	3.488	3.35755	3.52982	3.29719	3.02503	3.0018		0.550285	0.0295059		-0.00128525	-0.193349		-0.504792	-0.295389
YDL095W	PMT1	7.23026	7.09032	7.14578	7.03804	8.02857	8.11775	7.79155	7.80135		0.60673	0.0297639		-0.0844813	-0.0522831		-0.237016	-0.316394
YER113C	TMN3	4.02857	4.25399	4.18824	3.97269	3.96255	4.04439	3.67243	3.488		0.766695	0.0297639		0.159674	-0.281297		-0.290124	-0.556393
YDL221W	YDL221W	1.02857	1.64155	1.18903	0.545968	1.07039	1.7137	2.62293	2.46989		0.710154	0.0298505		0.160465	-1.09558		1.55254	0.75619
YOR107W	RGS2	1.64155	1.20789	1.97085	2.06005	2.60407	2.76765	3.58616	3.16832		0.435976	0.030016		0.329308	0.852155		0.982093	0.400666
YER122C	GLO3	6.30907	6.16511	6.14221	6.14771	5.88069	6.02059	5.65449	5.59036		0.48476	0.030016		-0.166858	-0.0173943		-0.226193	-0.430229
YBR238C	YBR238C	6.55842	6.36212	6.62717	6.64429	7.1914	7.0129	7.43271	7.42475		0.523305	0.030016		0.0687483	0.28217		0.241304	0.41185
YGL190C	CDC55	5.15947	5.09297	5.2854	5.25323	4.89336	4.8674	4.56438	4.42358		0.664146	0.030016		0.125934	0.160264		-0.328984	-0.443824
YNL239W	LAP3	5.78816	5.66221	5.78947	5.70653	5.5245	5.20085	5.10308	4.82375		0.976697	0.030016		0.00130478	0.0443251		-0.421425	-0.3771
YNL248C	RPA49	5.75596	5.66107	5.82248	5.79961	5.22574	5.22728	4.82833	4.87036		0.83389	0.0301015		0.0665195	0.13854		-0.397411	-0.356914
YNL326C	PFA3	5.13709	5.07852	5.13217	5.0063	5.36877	4.97591	5.57682	5.72274		0.834867	0.0301958		-0.00492808	-0.0722264		0.208056	0.746834
YHL007C	STE20	5.06867	5.05918	5.02901	5.24375	5.06091	5.30049	4.88313	4.81301		0.931558	0.0302485		-0.0396597	0.184563		-0.17778	-0.487478
YIL026C	IRR1	3.3978	2.99639	3.37712	3.07553	2.852	3.04439	2.57531	2.40871		0.985853	0.0302598		-0.0206792	0.0791439		-0.276687	-0.635682
YJL073W	JEM1	2.63459	2.74846	2.87971	2.7137	3.13258	3.12928	2.62527	2.79286		0.880071	0.0304393		0.245112	-0.0347654		-0.507306	-0.336428
YHR083W	SAM35	4.488	4.44294	4.38888	4.19298	4.37851	4.05311	4.80581	4.66334		0.457602	0.0305482		-0.0991224	-0.24996		0.427297	0.610233
YDR161W	ACL4	4.02857	4.01346	3.94579	3.86592	3.24336	3.26153	3.85499	3.72901		0.643925	0.0311262		-0.0827742	-0.147543		0.611629	0.467478
YLL002W	RTT109	2.61824	2.71589	2.86196	2.06695	2.37851	2.37295	1.44361	1.77821		0.82981	0.0312087		0.243717	-0.648943		-0.934905	-0.594744
YNL240C	NAR1	5.18269	5.08066	5.11894	5.00899	4.6241	4.92837	5.08789	5.29756		0.682698	0.0312198		-0.0637512	-0.0716689		0.463786	0.369188
YPL053C	KTR6	4.98048	5.02857	5.08108	5.07168	5.02503	5.03738	5.51223	5.3194		0.949575	0.031307		0.100602	0.0431077		0.487198	0.282019
YKR056W	TRM2	3.27798	3.70155	3.62293	3.56071	3.76871	3.85898	4.29939	4.1811		0.959994	0.0315791		0.344946	-0.140834		0.530678	0.322127
YIL046W	MET30	4.38128	4.23879	4.31397	4.51538	4.9644	5.15704	5.30342	5.57984		0.877554	0.0317568		-0.067312	0.276598		0.339017	0.4228
YNL061W	NOP2	4.7666	4.78188	4.99277	4.80012	4.10936	4.82477	4.0505	3.84599		0.758657	0.0317859		0.226173	0.0182391		-0.0588589	-0.978776
YLR428C	YLR428C	-1.08927	-0.268817	-0.304006	-1.08927	0.333424	1.61353	2.36737	2.70708		0.985853	0.0319208		0.785261	-0.820451		2.03395	1.09355
YDL113C	ATG20	3.45549	3.51349	3.6565	3.53605	3.5656	4.08236	4.37226	4.27202		0.868209	0.0322939		0.201005	0.0225622		0.806658	0.189661
YLR433C	CNA1	4.23955	4.34908	4.47638	4.33842	4.11103	4.48607	3.94392	3.73877		0.8374	0.0323559		0.236831	-0.0106577		-0.16711	-0.747303
YGR243W	MPC3	6.35332	6.53528	6.53574	6.85587	5.8632	5.91145	5.4851	5.40259		0.43637	0.0326504		0.182419	0.32059		-0.37809	-0.508866
YMR291W	TDA1	5.80813	5.99027	6.07296	6.18765	5.71315	5.4489	5.25399	5.24755		0.312934	0.0329259		0.264836	0.197375		-0.459157	-0.201353
YOL012C	HTZ1	6.04396	6.25153	6.18982	6.28225	5.72792	6.15967	5.5601	5.31143		0.9432	0.0330012		0.145868	0.0307247		-0.167817	-0.848239
YDR270W	CCC2	0.731183	0.773996	0.321928	0.948601	1.04963	1.63227	2.4957	1.70044		0.897562	0.0330867		-0.409255	0.174605		1.44606	0.0681715
YPL104W	MSD1	4.36457	4.38059	4.46205	4.41549	4.67807	4.64962	4.97865	5.08746		0.959994	0.0330867		0.0974799	0.0348973		0.300581	0.437847
YCR045W-A	YCR045W-A	4.0045	3.51728	3.71918	3.926	4.24869	4.02945	4.71644	4.89627		0.988588	0.0331145		-0.285318	0.408724		0.467756	0.866819
YDR300C	PRO1	5.21023	5.22766	5.20163	4.93782	4.93263	5.03078	4.6017	4.58436		0.422217	0.0331602		-0.00859913	-0.289849		-0.330932	-0.446416
YDL017W	CDC7	1.75702	1.79909	2.22959	2.08406	2	1.83188	2.59932	2.58736		0.517306	0.0332609		0.472565	0.284977		0.599318	0.755488
YNL262W	POL2	2.49057	2.54844	2.62293	2.76765	2.53854	2.70929	2.23573	2.22651		0.618391	0.0332609		0.13236	0.219218		-0.302811	-0.482782
YIR007W	EGH1	5.10014	5.06953	5.05658	5.19495	5.39094	5.30597	4.97591	5.05961		0.998939	0.0332609		-0.0435531	0.125423		-0.415037	-0.246356
YJR121W	ATP2	9.79435	9.74238	10.0978	10.0901	8.60552	8.50414	8.35826	8.12153		0.00418653	0.0333906		0.303418	0.347762		-0.247261	-0.38261
YOR243C	PUS7	4.93499	5.02281	5.18982	5.1102	4.79233	5.06566	4.62234	4.49633		0.535674	0.0333906		0.254836	0.0873845		-0.16999	-0.569324
YLR321C	SFH1	4.10601	3.95047	4.49378	4.26153	3.86888	4.18982	3.47508	3.59096		0.150538	0.033644		0.387762	0.311062		-0.393799	-0.598863
YOR178C	GAC1	7.67016	7.47889	7.78784	7.78947	6.76368	6.55796	6.40224	6.2867		0.308013	0.0337723		0.117677	0.310578		-0.361432	-0.271265
YKR093W	PTR2	5.55029	5.58015	5.73579	5.66818	4.93734	5.3844	3.852	4.68201		0.882816	0.0338375		0.185508	0.0880304		-1.08535	-0.702384
YLR382C	NAM2	3.42358	3.20945	3.36877	3.41414	3.15543	3.28096	2.87971	2.61117		0.952878	0.0339416		-0.0548098	0.204682		-0.27572	-0.669784
YBR052C	RFS1	5.30998	5.67271	5.59932	5.71012	5.42122	5.58165	5.85972	5.97751		0.793332	0.0339451		0.289341	0.0374094		0.438498	0.395856
YDL157C	YDL157C	5.5373	5.85524	5.72765	5.66448	5.87036	6.14914	5.50335	5.56377		0.921629	0.033957		0.190352	-0.190759		-0.367016	-0.585369
YHR202W	YHR202W	1.26303	0.9855	1.26303	1.87184	0.879706	1.22033	1.76553	1.89918		0.549707	0.0339579		0	0.886343		0.885829	0.678846
YLR063W	BMT6	2.72247	2.42223	2.45681	2.36457	2.93734	3.17951	3.6311	3.63807		0.774439	0.0339621		-0.26566	-0.0576606		0.69376	0.458563
YLR228C	ECM22	4.61058	4.74578	4.6565	4.42962	4.42828	4.36036	4.81506	4.70653		0.429907	0.0339721		0.0459144	-0.316159		0.386787	0.346166
YDR265W	PEX10	2.89918	3.20163	3.35473	2.90497	3.48027	3.15704	3.92315	3.88264		0.965385	0.0340881		0.455559	-0.296668		0.442884	0.725599
YPR095C	SYT1	4.45943	4.35262	4.41414	4.39163	4.50462	4.55582	4.22805	4.19061		0.897098	0.0342717		-0.0452961	0.039013		-0.276571	-0.365201
YLL021W	SPA2	3.36877	3.1635	3.45286	3.17313	3.26153	3.30305	2.9782	2.82782		0.985853	0.0344042		0.0840906	0.0096287		-0.283335	-0.475231
GTK30D03050	GTK30D03050	3.22033	2.9222	2.99458	2.98003	3.96532	3.89433	4.43029	4.40939		0.862332	0.034545		-0.22575	0.0578275		0.464963	0.515058
YPR160W	GPH1	6.8475	6.86814	7.26425	7.46606	5.9814	5.89772	5.6499	5.70044		8.31039e-05	0.034672		0.416759	0.597913		-0.331493	-0.197285
YLR024C	UBR2	4.39985	4.41954	4.44758	4.39643	4.47573	4.08236	3.85997	3.9364		0.936374	0.0347395		0.0477245	-0.0231054		-0.615764	-0.14596
YNL271C	BNI1	4.04439	3.8125	3.94017	3.73552	3.87283	4	3.56682	3.68818		0.596791	0.0347671		-0.104227	-0.076976		-0.306014	-0.31182
YDL134C	PPH21	5.79935	5.79025	5.74201	5.75969	5.64501	5.81711	5.29425	5.44162		0.748251	0.0347673		-0.0573402	-0.0305623		-0.350757	-0.375495
YNR055C	HOL1	6.25248	6.15441	6.25682	6.09761	6.52732	6.11437	6.69516	6.7807		0.827904	0.0347673		0.00434575	-0.0568023		0.167838	0.666337
YOL097W-A	YOL097W-A	3.96162	4.14975	3.76129	3.49825	2.22651	1.28096	3.26003	3.37573		0.567696	0.0349045		-0.200338	-0.651496		1.03352	2.09478
YER049W	TPA1	4.44626	4.49953	4.42156	4.30743	4.34412	4.72792	4.20867	4.03298		0.532776	0.035033		-0.0246963	-0.192098		-0.135445	-0.694938
YDR105C	TMS1	6.48446	6.4261	6.61102	6.51775	7.24764	7.32508	7.56583	7.58519		0.783077	0.0350835		0.126564	0.0916511		0.318183	0.260107
Q0055	AI2	-5.05889	-5.05889	-5.05889	-5.05889	-3.05889	-2.05889	-5.05889	-5.05889		0.985853	0.0350835		0	0		-2	-3
YAL055W	PEX22	2.82985	3.4019	2.6893	2.83592	2.34199	2.67582	1.42223	1.41684		0.526059	0.0351669		-0.14055	-0.565979		-0.919753	-1.25898
YLR371W	ROM2	4.99141	4.77294	5.01703	5.03474	4.88557	5.0505	4.66164	4.65878		0.673467	0.0351669		0.0256226	0.261803		-0.223939	-0.391719
YDL205C	HEM3	6.56056	6.59544	6.75982	6.64933	5.62147	5.92695	5.31542	5.46891		0.705192	0.0351669		0.19926	0.0538841		-0.306045	-0.458039
YGR266W	YGR266W	1.29278	1.29278	1.1375	0.823749	0.83996	1.44361	2.18269	1.7137		0.596543	0.0353419		-0.155278	-0.469032		1.34273	0.270089
YDR395W	SXM1	5.83162	5.83162	5.84373	5.81173	5.43062	5.36562	5.12019	5.05224		0.888184	0.03565		0.0121087	-0.019896		-0.310434	-0.313381
YLR459W	GAB1	4.20711	4.32912	4.37921	4.22419	5.48929	5.48123	5.97384	5.73688		0.985853	0.035708		0.172093	-0.104929		0.484555	0.255641
YLR380W	CSR1	7.57259	7.57221	7.52246	7.59455	7.53683	7.53403	7.268	7.24327		0.850252	0.0357733		-0.0501227	0.022341		-0.268826	-0.290761
YLR411W	CTR3	1.73552	1.83188	2.15056	2.08066	0.847997	1.18903	2.08406	2.14731		0.764593	0.0358764		0.415037	0.24878		1.23607	0.958273
YHR189W	PTH1	4.43496	4.36036	4.64039	4.78921	4.32193	4.34127	5.15381	4.6427		0.405452	0.0358907		0.205428	0.428843		0.831877	0.301427
YMR100W	MUB1	4.8679	4.72792	4.90352	5.08066	4.86394	4.79961	4.43563	4.51033		0.50985	0.0358937		0.0356239	0.352737		-0.42831	-0.289276
YBL009W	ALK2	3.06867	2.92979	3.08236	2.65535	2.62059	2.62527	1.98185	2.13422		0.752055	0.0358956		0.0136912	-0.274439		-0.638734	-0.49105
YKL109W	HAP4	5.57501	5.71122	6.15583	6.14425	4.99186	4.70598	4.5292	4.3427		2.70672e-05	0.0359702		0.58082	0.433031		-0.462666	-0.363281
YNL009W	IDP3	1.1177	0.948601	1	0.62293	1.12433	1.32769	2.08066	2.02503		0.837706	0.0359865		-0.117695	-0.32567		0.95633	0.697341
YKL160W	ELF1	6.56712	6.51964	6.91421	6.43229	6.02015	6.02392	5.75409	5.32265		0.765328	0.0360083		0.347086	-0.0873449		-0.266061	-0.701271
YER052C	HOM3	6.06113	5.97659	6.16108	6.02037	6.74819	6.55842	6.91061	7.08257		0.918638	0.0360659		0.0999533	0.0437761		0.16242	0.524154
YPL262W	FUM1	6.74133	6.75368	7.05072	7.07553	6.57758	6.47784	6.32625	6.14384		0.0281512	0.036161		0.309387	0.321848		-0.25133	-0.333997
YEL007W	MIT1	6.45154	6.25927	6.69349	6.65678	6.3837	6.1633	5.97613	6.00473		0.0445923	0.036161		0.241946	0.39751		-0.40757	-0.158571
YGR209C	TRX2	8.53329	8.76072	8.23007	7.98596	8.91175	8.92887	8.61923	8.63739		7.38266e-06	0.036176		-0.303222	-0.774764		-0.292522	-0.291488
YML058W	SML1	7.90183	7.49161	7.72914	7.79246	8.42798	8.40293	8.68015	8.79659		0.985853	0.0362318		-0.172687	0.300852		0.252165	0.393664
YDR174W	HMO1	6.48382	6.46156	6.49201	6.4545	6.12267	6.31433	5.81147	5.90448		0.910257	0.0362845		0.00819761	-0.00705636		-0.311202	-0.40985
YDR032C	PST2	7.60696	7.47881	7.44617	7.43713	7.38284	7.10245	6.86233	6.90857		0.437596	0.0364454		-0.160787	-0.0416822		-0.520513	-0.193875
YHR208W	BAT1	7.51916	7.4797	7.61699	7.49065	7.55727	7.19071	7.02081	7.0321		0.978756	0.0364986		0.0978254	0.0109509		-0.536459	-0.158613
YLR052W	IES3	5.38163	5.20867	5.52826	5.52857	4.86196	5.13955	4.6893	4.29646		0.411267	0.0366652		0.146629	0.319898		-0.172656	-0.843094
YDL066W	IDP1	7.60541	7.61257	7.76799	7.86338	7.04275	6.86678	6.6314	6.65764		0.322663	0.0367417		0.16258	0.250807		-0.411358	-0.209144
YJL068C	YJL068C	6.0365	6.19987	6.08831	5.88923	6.09107	6.00405	5.74443	5.69042		0.438178	0.0367898		0.0518079	-0.310638		-0.346635	-0.313635
YMR253C	YMR253C	2.54102	3.35896	3.32481	3.0321	3.27352	3.18269	3.89045	3.63227		0.885319	0.0368025		0.783791	-0.326858		0.616931	0.449576
YLR079W	SIC1	4.39849	4.68257	4.64789	4.04002	4.39438	4.82782	4.09085	4.12846		0.642584	0.0368162		0.249403	-0.642558		-0.303524	-0.699361
YDR374C	PHO92	1.83996	1.09085	0.641546	2.06695	3.27352	4.11353	4.58436	4.5741		0.985853	0.037048		-1.19841	0.976097		1.31085	0.460568
YML131W	YML131W	5.79597	5.9743	5.71287	5.85075	6.09635	5.91073	5.56925	5.75596		0.52451	0.0372336		-0.0831038	-0.12355		-0.527098	-0.154777
YKR039W	GAP1	4.49249	4.31542	4.72301	4.67073	5.32805	5.32841	5.64472	5.67327		0.155084	0.0372457		0.230518	0.355306		0.316675	0.344868
YJL212C	OPT1	6.38836	6.32751	6.52199	6.51412	6.34802	6.13709	6.51333	6.65507		0.529638	0.0374303		0.133631	0.186615		0.165313	0.517972
YER068W	MOT2	4.47054	4.37504	4.36807	4.50653	4.2032	4.25927	3.69377	3.9279		0.962819	0.0378188		-0.102467	0.131486		-0.509435	-0.331376
YDR127W	ARO1	7.19426	7.05148	7.28974	7.23429	6.25493	6.07232	5.86344	5.87946		0.620882	0.0378291		0.0954779	0.18281		-0.391491	-0.192859
YDL227C	HO	1.13093	1.1375	0.250962	1.59455	1.98185	2.28392	0.722466	1.13093		0.952055	0.0378785		-0.879969	0.457045		-1.25939	-1.15299
YNR011C	PRP2	1.99277	2.19535	2.57531	2.38405	2.59932	2.36737	3.06523	2.9222		0.268691	0.0379083		0.582544	0.188702		0.46591	0.554827
YPL159C	PET20	4.35685	4.29205	4.59036	4.51791	4.38819	4.53356	4.95513	4.90545		0.550088	0.03794		0.233514	0.22586		0.566937	0.371884
YJL098W	SAP185	3.45154	3.60288	3.50843	3.52982	3.40463	3.48027	2.97269	3.10601		0.890872	0.03794		0.0568878	-0.0730635		-0.431938	-0.374252
YMR229C	RRP5	5.3466	5.21062	5.39094	5.42055	4.68594	4.98231	4.55397	4.48543		0.718112	0.0380127		0.0443404	0.209927		-0.131965	-0.496882
YKL194C	MST1	3.65878	3.50716	3.29131	3.61117	3.48156	3.42626	2.82985	3.01792		0.679913	0.0380457		-0.367474	0.104012		-0.651708	-0.408343
YPL170W	DAP1	7.91874	8.27696	7.93026	7.58188	8.69877	7.75616	8.85761	8.98576		0.0515213	0.0381985		0.0115202	-0.695083		0.158834	1.2296
YLR060W	FRS1	6.72982	6.68398	6.75475	6.61883	6.37764	6.11728	5.94439	5.88704		0.836888	0.0383797		0.0249293	-0.0651512		-0.433254	-0.230242
YDR429C	TIF35	5.93711	6.06178	6.18031	5.96139	5.56346	5.99118	5.52136	5.09212		0.936608	0.0383797		0.243198	-0.100384		-0.0420984	-0.899059
GTK30I00140	GTK30I00140	1.79077	1.62761	1.26903	0.933573	2.64155	1.62293	2.90497	3.32625		0.396904	0.0384181		-0.521739	-0.694034		0.26342	1.70332
YDL024C	DIA3	1.95977	2.09761	2.02857	2.30451	2.87184	2.53356	3.37295	3.22805		0.926541	0.0384181		0.068799	0.2069		0.501108	0.694486
YIL090W	ICE2	6.01502	5.71452	5.79546	5.81481	6.23974	6.1014	6.53107	6.47249		0.704574	0.0384182		-0.219569	0.100286		0.291328	0.37109
YKR058W	GLG1	3.29425	3.14731	3.41819	3.39369	2.67356	2.86394	2.37851	2.26604		0.55567	0.0384354		0.123937	0.246384		-0.295045	-0.597902
YGR144W	THI4	-0.286304	-1.18442	0.773996	0.565597	0.238787	0.879706	1.57046	1.78241		0.160499	0.0385061		1.0603	1.75002		1.33168	0.902703
YLR362W	STE11	1.02148	1.29866	1.42761	1.41143	1.87971	2.06005	2.46467	2.41414		0.652749	0.0385061		0.406126	0.112768		0.584963	0.354088
YLR312C	ATG39	0.807355	0.847997	1.76129	1.97085	1.04264	1.33342	2.06695	2.01078		0.0477549	0.0385393		0.95393	1.12286		1.02431	0.677356
YJR085C	YJR085C	7.92469	8.4761	8.52845	8.54156	8.40655	8.49733	8.18864	8.15593		0.328043	0.0386291		0.60376	0.0654632		-0.217907	-0.341402
YER087W	AIM10	2.65992	3.03738	3.29131	3.11936	2.61353	2.76553	2.19535	1.99639		0.373788	0.0387724		0.631384	0.081974		-0.418184	-0.769146
YBR172C	SMY2	5.71809	5.44758	5.71094	5.57833	5.78477	6.0387	5.6985	5.45418		0.973973	0.0388843		-0.00714343	0.130756		-0.0862694	-0.584524
YPL034W	YPL034W	3.41549	3.0635	2.69377	3.46467	3.0268	2.92029	3.77189	3.65421		0.886282	0.0389981		-0.721723	0.401165		0.745086	0.733913
YJR024C	MDE1	5.06652	5.14323	5.10894	5.13709	4.85848	5.12433	4.4614	4.58916		0.970204	0.0390792		0.0424228	-0.00613653		-0.397081	-0.535164
YDR432W	NPL3	6.52654	6.41058	6.62994	6.47054	6.10287	6.18824	5.88996	5.8089		0.890338	0.0391393		0.103401	0.0599583		-0.212908	-0.379343
YGL027C	CWH41	4.52544	4.29866	4.27202	4.29572	4.29205	4.41954	4.01614	3.99458		0.439995	0.0393225		-0.253419	-0.00293529		-0.275906	-0.424959
YBR088C	POL30	4.23649	4.07125	4.31034	4.30451	3.55582	3.74308	3.19692	2.81558		0.803478	0.0395831		0.0738475	0.233263		-0.358894	-0.927509
YLR016C	PML1	3.7939	4.55888	4.05572	4.30086	4.40803	4.87922	5.10811	5.23458		0.912927	0.0395999		0.26182	-0.258024		0.700074	0.355362
YJL054W	TIM54	4.69377	4.77452	4.79649	4.91934	5.18349	5.24755	4.72683	4.9644		0.814081	0.0396007		0.102728	0.144817		-0.456655	-0.283149
YKL077W	YKL077W	6.4219	6.40684	6.42105	6.41414	6.36072	6.53699	6.12722	6.15381		0.905844	0.0396007		-0.000841565	0.00729278		-0.233495	-0.38318
YPR137W	RRP9	4.10434	3.9855	4.12184	3.93546	3.67807	3.89627	3.41007	3.25248		0.916765	0.0396007		0.0175076	-0.0500407		-0.268002	-0.643796
YNR001C	CIT1	7.77103	7.81538	8.17542	8.15608	7.04264	6.89954	6.78829	6.45401		0.00215201	0.0397036		0.404398	0.3407		-0.25435	-0.445527
YHR018C	ARG4	6.30979	6.34607	6.56102	6.37156	5.76235	5.63604	5.30561	5.40599		0.649296	0.0397721		0.251226	0.0254884		-0.456743	-0.230052
YBL031W	SHE1	2.79909	3.05832	3.18428	3.25399	2.7137	2.83188	2.25701	1.79909		0.642714	0.0399396		0.385193	0.195673		-0.456685	-1.03279
YHR037W	PUT2	3.44626	3.43296	3.58496	3.26903	3.36737	3.5472	3.90593	3.90497		0.959994	0.0399607		0.138706	-0.163926		0.538557	0.357763
YCL035C	GRX1	7.41075	7.49305	7.49937	7.56841	7.11374	7.44593	6.74766	7.01056		0.91792	0.0401896		0.0886194	0.0753573		-0.366086	-0.435369
YOL120C	RPL18A	6.46091	6.47978	6.66931	6.91456	6.41193	5.96047	5.46956	5.72274		0.299684	0.0402154		0.208404	0.434784		-0.942374	-0.237726
YPL247C	YPL247C	3.95047	3.88655	3.86096	4.14486	4.02945	4.35262	4.52168	4.73335		0.937762	0.0405448		-0.0895056	0.258312		0.492226	0.380737
YNL111C	CYB5	6.66605	7.01447	7.03606	6.77545	6.59529	6.6985	6.35103	6.13832		0.985853	0.0406189		0.370017	-0.239021		-0.244267	-0.560173
YER134C	YER134C	5.91289	5.60407	5.93216	5.95443	5.99413	6.04439	5.66278	5.59126		0.644806	0.0407127		0.0192663	0.350358		-0.331352	-0.453134
YER162C	RAD4	1.46989	1.44361	1.79077	1.09761	1.20789	1.37851	1.8679	2.04264		0.996703	0.0408934		0.320886	-0.345996		0.660004	0.664133
YML091C	RPM2	4.80581	4.79494	5.19417	5.19377	3.95884	3.77716	3.61471	3.33914		0.00144558	0.041281		0.388358	0.398836		-0.344133	-0.438019
YBR120C	CBP6	3.9514	4.08916	4.28466	4.01792	3.86096	3.62527	3.04963	2.98003		0.897562	0.0415865		0.333261	-0.0712372		-0.811332	-0.645245
YGR169C	PUS6	3.06178	2.94111	2.81352	2.76341	2.95606	3.03386	2.33914	2.44095		0.579686	0.0416446		-0.248252	-0.177695		-0.616919	-0.592911
YGR132C	PHB1	6.69209	6.59006	6.68398	6.65864	6.28965	6.52873	6.00203	6.15563		0.985853	0.0416549		-0.00811527	0.0685769		-0.287623	-0.3731
YDR001C	NTH1	5.19377	5.25663	4.72574	4.77452	5.05745	4.94251	5.33128	5.34447		2.8442e-06	0.0416868		-0.468031	-0.48211		0.273825	0.401959
YJL008C	CCT8	5.41346	5.47508	5.478	5.18468	5.2502	5.58676	4.91934	5.16551		0.534636	0.0418249		0.0645424	-0.290408		-0.330864	-0.421255
YLL027W	ISA1	4.64443	4.75809	4.76394	4.49442	5.35861	5.44824	5.7939	5.78398		0.810734	0.0419698		0.11951	-0.263674		0.435289	0.33574
YGR128C	UTP8	4.3427	4.08321	4.26078	4.16108	3.72247	3.52105	3.15704	3.20633		0.927178	0.0420999		-0.0819185	0.0778681		-0.565422	-0.31472
YDL132W	CDC53	4.63923	4.62176	4.6311	4.7447	4.65764	4.84046	4.36247	4.46009		0.984821	0.0421835		-0.00812788	0.12294		-0.29517	-0.380376
YFL010C	WWM1	6.69112	6.83188	6.79429	6.46434	6.7086	6.93298	6.34394	6.57788		0.511282	0.0425904		0.103171	-0.367536		-0.36466	-0.3551
YML076C	WAR1	4.51602	4.47379	4.64731	4.48993	4.27724	4.45418	4.13175	3.854		0.91784	0.0426734		0.131299	0.0161413		-0.145487	-0.60018
YDL156W	CMR1	2.52356	2.67807	2.44626	2.60407	2.51854	2.57531	1.97085	1.88362		0.843339	0.0426863		-0.0773057	-0.0740006		-0.547681	-0.691692
YLL041C	SDH2	8.1165	8.15517	8.58946	8.67126	6.89433	7.08874	6.74604	6.60837		2.56392e-05	0.0427578		0.472964	0.516086		-0.148289	-0.48037
YGL235W	YGL235W	0.739848	1.68706	1.27501	0.485427	2.46205	1.76129	2.96901	3.15218		0.789472	0.0427578		0.535159	-1.20163		0.50696	1.3909
YHR158C	KEL1	4.32769	4.17233	4.42828	4.29719	4.19692	4.29866	3.76765	4.01792		0.790491	0.0427578		0.100589	0.124864		-0.429267	-0.280736
YOR008C-A	YOR008C-A	1.51602	1.93734	1.63691	1.52105	-0.643856	1.0072	2.52607	2.10098		0.93989	0.0427578		0.120899	-0.416294		3.16993	1.09378
YOR025W	HST3	5.49281	5.46271	5.40701	5.27984	5.10518	5.24527	4.91265	4.69877		0.372473	0.0428047		-0.0858018	-0.182864		-0.192525	-0.546493
YMR137C	PSO2	1.28096	1.53107	1.95606	1.73985	2.10769	1.95233	2.59216	2.62059		0.425351	0.0433058		0.6751	0.208779		0.48447	0.668253
YCL044C	MGR1	5.52607	5.36072	5.74201	5.64068	6.35755	5.97223	6.5821	6.55059		0.239028	0.0433231		0.215937	0.279963		0.224552	0.57836
YGL049C	TIF4632	4.6017	4.50398	4.69377	4.46858	4.36527	4.77663	4.26529	4.13093		0.985853	0.0434103		0.0920692	-0.0354014		-0.0999857	-0.6457
YOL098C	SDD3	4.82426	4.73064	4.76182	4.79025	4.88655	4.67073	4.43162	4.45943		0.897562	0.0435001		-0.0624416	0.0596108		-0.454927	-0.211295
YDL058W	USO1	3.98732	3.87578	4.09001	4.12598	4.49057	4.27128	4.09085	4.02414		0.484519	0.0438759		0.102686	0.250202		-0.399717	-0.247134
YNL074C	MLF3	5.26679	5.14486	5.36982	5.36737	5.44427	5.41312	5.75729	5.77584		0.596888	0.0439712		0.103029	0.222509		0.31302	0.362721
YER087C-B	SBH1	7.28956	7.49969	7.49697	7.34252	7.5601	7.40582	6.84674	7.25191		0.985609	0.0440238		0.207416	-0.157167		-0.713359	-0.153914
YPL184C	MRN1	4.96855	4.69488	5.02813	4.86196	5.35966	5.58706	5.25663	4.99503		0.83389	0.0449137		0.0595755	0.167075		-0.103028	-0.592033
YJL023C	PET130	2.76129	2.72247	2.68706	2.01078	3.43829	3.33771	3.94017	3.87086		0.515101	0.0449632		-0.0742246	-0.711686		0.501874	0.533147
YGR249W	MGA1	3.58256	2.73985	3.33628	3.21257	3.57531	3.488	3.9486	4.06178		0.985853	0.0451938		-0.246273	0.472721		0.373289	0.573775
YLR101C	YLR101C	2.28688	3.06005	1.5008	-1.2863	-1.4344	-0.395929	1.29278	1.28688		0.00393133	0.0455306		-0.786079	-4.34635		2.72718	1.68281
YBR296C-A	YBR296C-A	1.42223	0.263034	2.22342	2.43029	0.275007	1.32769	2.75489	3.22959		0.485459	0.0455306		0.80119	2.16725		2.47988	1.9019
YNL304W	YPT11	2.76553	3.02326	2.42223	3.11103	2.47249	2.96717	2	2.08066		0.853084	0.045562		-0.343302	0.087776		-0.472488	-0.886511
YMR037C	MSN2	3.98914	4.0993	4.23649	4.34341	4.3512	4.27053	3.9486	3.93168		0.357	0.0460162		0.247354	0.244113		-0.402603	-0.338846
YLR300W	EXG1	7.75368	7.74759	7.69209	7.60214	7.36308	7.45204	7.17961	7.09614		0.405681	0.0460333		-0.0615924	-0.145447		-0.183473	-0.3559
YBR145W	ADH5	7.92469	7.92647	7.81999	7.82572	6.82235	6.54319	6.39283	6.30451		0.405936	0.046416		-0.104706	-0.100752		-0.429515	-0.238675
YPL248C	GAL4	4.44493	4.32697	4.67582	4.62293	4.10852	3.91456	3.62176	3.64731		0.167398	0.0465528		0.230884	0.295962		-0.486766	-0.26725
YPR016C	TIF6	8.00899	7.89026	8.08486	8.01145	7.82896	7.7161	8.05718	8.08948		0.836695	0.0474259		0.0758727	0.121187		0.228218	0.373378
YNR062C	YNR062C	-0.494109	-1.68966	-0.37707	-0.915936	-0.0740006	-0.0144996	0.831877	1.58496		0.897562	0.0474341		0.117039	0.773724		0.905878	1.59946
YDR457W	TOM1	4.8802	4.7366	4.98914	4.92884	4.83036	4.69711	4.45352	4.51475		0.594889	0.0476134		0.108943	0.192239		-0.376839	-0.182353
YBR257W	POP4	3.14078	3.35755	3.62527	3.851	2.926	3.35473	3.75382	3.74416		0.222687	0.0476212		0.484492	0.493447		0.827819	0.389427
YLR435W	TSR2	3.0036	2.70266	3.02326	3.05311	2.21412	2.91073	1.99277	1.63691		0.803478	0.0477644		0.0196531	0.350454		-0.221356	-1.27382
YDL182W	LYS20	4.77558	4.80684	5.39678	5.26903	4.29352	4.38267	4.10769	3.52356		0.000113693	0.0478558		0.621199	0.462194		-0.18583	-0.859105
YGL062W	PYC1	7.34607	7.22304	7.54102	7.53286	6.45467	6.5089	6.23726	6.27817		0.112206	0.0478878		0.194949	0.309826		-0.217412	-0.230733
YKL210W	UBA1	6.67652	6.60733	6.63358	6.59976	6.80761	6.6311	6.43313	6.44758		0.790944	0.0483793		-0.0429448	-0.00756621		-0.374486	-0.183525
YCL049C	YCL049C	4.77716	4.99005	5.06221	4.90159	5.43996	5.94579	6.14792	6.20085		0.939065	0.0484039		0.285051	-0.0884562		0.707962	0.255055
YDR321W	ASP1	6.77189	6.78738	6.75275	6.5944	6.53559	6.47298	6.23745	6.17253		0.437191	0.0486628		-0.019137	-0.192981		-0.298137	-0.300448
YBL039W-B	YBL039W-B	3.16027	2.99458	2.95977	3.30451	2.85798	2.33056	3.93452	3.64501		0.98936	0.0487816		-0.200505	0.309931		1.07654	1.31445
YLR104W	LCL2	4.87135	4.80271	4.85898	4.43563	5.05875	5.56133	4.79701	4.76607		0.68079	0.0489117		-0.0123752	-0.367082		-0.261736	-0.795261
YBR010W	HHT1	8.74702	8.66697	8.48236	8.71449	7.89391	7.90893	7.64198	7.56514		0.524482	0.0489904		-0.264654	0.0475164		-0.251929	-0.343793
YPR021C	AGC1	4.53792	4.61941	4.70984	4.52544	4.16027	3.89336	3.69711	3.59096		0.993002	0.049138		0.171925	-0.0939705		-0.463168	-0.302401
YNL076W	MKS1	3.9542	3.67356	4.04002	4.12184	3.75168	3.89433	3.16189	3.54102		0.393434	0.0492947		0.0858194	0.448288		-0.58979	-0.353314
YDL155W	CLB3	4.44692	4.58015	4.38888	4.40259	4.32984	4.36947	3.8953	3.98003		0.542761	0.0493458		-0.0580395	-0.17756		-0.434539	-0.389441
YML007W	YAP1	5.12019	5.07296	5.06307	4.94064	4.88557	5.16912	4.68818	4.68762		0.53294	0.0496399		-0.0571146	-0.132327		-0.197394	-0.481503
YDR177W	UBC1	5.86121	6.09677	6.10811	5.79129	5.55459	5.48929	5.23764	4.96671		0.888184	0.0496399		0.246895	-0.305475		-0.316949	-0.522579
YLR425W	TUS1	3.19377	3.23879	3.55827	3.65076	3.43696	3.25248	3.00899	2.91456		0.0242816	0.0497707		0.364496	0.411978		-0.427973	-0.337912
YPL137C	GIP3	4.70543	4.58376	4.88899	4.86146	4.81967	4.72301	4.52293	4.41143		0.217901	0.0497707		0.183562	0.277699		-0.296734	-0.311586
YLR364W	GRX8	4.28614	4.75275	4.54535	4.18031	4.67186	4.45549	4.01703	3.76977		0.774861	0.0501393		0.259209	-0.572442		-0.654828	-0.68572
YBR132C	AGP2	4.93734	4.60288	5.1631	5.27612	5.22997	4.98868	5.42122	5.46826		0.00637429	0.0505505		0.225752	0.67324		0.191251	0.479573
YDR086C	SSS1	7.39455	7.34359	7.46785	7.51523	6.74739	7.46655	6.59425	6.66178		0.790944	0.050723		0.0733016	0.171641		-0.153137	-0.804767
YIL051C	MMF1	7.57266	7.65707	7.59656	7.58436	7.3856	7.35359	7.14558	6.92517		0.803199	0.0509939		0.0239002	-0.072707		-0.240028	-0.428419
YNL068C	FKH2	3.03738	3.01614	3.16672	3.10769	2.86394	2.90881	2.52356	2.31325		0.874136	0.0510796		0.129333	0.0915482		-0.340376	-0.595567
YHR116W	COX23	4.54226	4.88704	4.83693	4.54844	4.20555	3.86295	4.63575	4.64616		0.928791	0.0511716		0.294676	-0.338601		0.430205	0.783215
YCL047C	POF1	4.5741	4.67186	4.69877	4.62994	4.47314	5.03562	4.18031	4.32769		0.996979	0.0513381		0.124673	-0.0419201		-0.29283	-0.707937
YKR019C	IRS4	3.72683	3.92029	3.97269	3.9607	5.0045	5.37921	5.60881	5.55704		0.793478	0.05139		0.245861	0.0404037		0.604308	0.177837
YGR239C	PEX21	2.81967	2.72683	3.04264	2.82579	2.87971	3.12102	3.64501	3.59216		0.87293	0.0517844		0.222976	0.0989544		0.765304	0.471143
YMR296C	LCB1	6.35878	6.21335	6.26754	6.35297	6.29829	6.42878	6.60615	6.73525		0.98056	0.0520152		-0.0912473	0.139623		0.307854	0.306472
YKR080W	MTD1	4.16108	4.25399	4.16189	4.02503	4.52607	4.49506	5.04264	4.86096		0.671204	0.0520439		0.0008062	-0.22896		0.516576	0.365907
YBR080C	SEC18	5.8902	5.83238	5.81686	5.81686	5.76871	5.6761	5.42694	5.43363		0.713771	0.052123		-0.0733478	-0.0155281		-0.341778	-0.242471
YDL003W	MCD1	2.76765	2.58256	2.46467	2.60407	2.0635	2.26003	1.60881	1.40599		0.714625	0.0524915		-0.302987	0.0215153		-0.454694	-0.854033
YFL022C	FRS2	6.55305	6.38422	6.32319	6.35755	5.93782	5.70764	5.48768	5.50843		0.345329	0.0524931		-0.229863	-0.0266705		-0.450136	-0.199207
YNR004W	SWM2	3.35332	3.5097	3.04614	3.25248	3.15056	3.62176	3.98094	4.21723		0.622702	0.0524931		-0.307182	-0.25722		0.83038	0.595472
YBL022C	PIM1	3.29131	3.29131	3.41549	3.35332	3.23573	3.23266	2.76765	2.91839		0.894342	0.0524931		0.124179	0.0620144		-0.468072	-0.314275
YJR056C	YJR056C	4.26604	4.18349	4.0321	3.88557	4.42089	4.90256	5.24031	5.07468		0.364376	0.0525655		-0.233936	-0.297912		0.819428	0.172121
YMR222C	FSH2	4.16752	4.19928	3.73769	4.09424	4.81044	4.23649	4.99141	5.2407		0.43637	0.0525924		-0.429832	-0.105044		0.180965	1.0042
YGL125W	MET13	5.79753	5.48575	5.80219	5.97384	6.5489	6.60036	6.79909	6.91934		0.352539	0.052675		0.00466138	0.488092		0.250188	0.318981
YGL017W	ATE1	3.2765	3.38405	3.40054	2.96347	3.34625	3.33199	3.71918	3.93734		0.718112	0.0527409		0.124041	-0.420576		0.372936	0.605353
YNR038W	DBP6	3.82985	3.6565	3.98094	4.14649	4.01078	4.41278	4.65935	4.57954		0.202869	0.05286		0.15109	0.489996		0.648574	0.166761
YOR275C	RIM20	3.59455	3.68482	3.69042	3.54102	3.99277	4.09508	4.40599	4.41278		0.890872	0.0530083		0.0958685	-0.1438		0.413224	0.317701
YPL145C	KES1	7.9321	7.67793	7.98345	8.01072	7.52482	7.59148	7.33468	7.26021		0.48476	0.0534576		0.0513531	0.332793		-0.19014	-0.331271
YJL119C	YJL119C	3.51475	3.63227	3.74524	3.69711	3.59574	3.35614	4.16912	4.31107		0.927178	0.0535658		0.230484	0.0648384		0.573381	0.954923
YHL020C	OPI1	3.904	4.0054	4.37573	3.99729	3.68818	3.848	4.21101	4.21179		0.533191	0.0538243		0.471732	-0.00810758		0.522832	0.363794
YDL201W	TRM8	4.76075	4.63459	4.79857	4.71644	4.04527	4.74416	3.81762	3.90111		0.979831	0.0539615		0.0378158	0.081849		-0.227645	-0.843053
YKL080W	VMA5	7.06835	7.19781	7.04745	6.96162	6.7301	6.46989	6.22843	6.32805		0.33152	0.0540455		-0.0208972	-0.236183		-0.501663	-0.141839
YER163C	GCG1	5.03122	4.82426	4.87135	4.65592	5.0072	5.24679	5.48993	5.58045		0.532997	0.0540455		-0.159868	-0.168334		0.482733	0.333659
YER063W	THO1	5.11061	5.13627	5.35579	4.70487	4.44956	4.60466	3.73444	4.21723		0.888184	0.0540455		0.245178	-0.431401		-0.715123	-0.387434
YOR128C	ADE2	4.10936	4.19535	4.09339	4.36667	4.49057	4.32481	4.72356	4.851		0.952055	0.0541437		-0.0159694	0.171324		0.232988	0.526189
YER123W	YCK3	4.20945	4.20945	4.48671	4.62234	3.9855	4.20789	3.71809	3.66221		0.10698	0.0542294		0.277261	0.412891		-0.267413	-0.545687
YNR037C	RSM19	5.22226	6.14405	5.54566	5.39815	5.94205	6.44989	6.57939	6.79064		0.552896	0.0543625		0.323396	-0.745901		0.637346	0.34075
YGR227W	DIE2	4.90641	4.74093	4.97407	4.8475	4.90063	4.3875	5.14568	5.08023		0.896507	0.0546468		0.0676607	0.106568		0.245052	0.692731
YKL161C	KDX1	2.74201	2.57773	2.86987	3.05658	3.27352	3.45286	3.80735	3.81967		0.532997	0.0547883		0.127865	0.478853		0.533839	0.366809
YKL012W	PRP40	2.87774	3.04789	2.926	3.17632	2.89724	3.24336	3.57531	3.51979		0.964219	0.0548858		0.0482552	0.128435		0.678072	0.276429
YKL033W-A	YKL033W-A	6.71809	6.79727	7.1979	7.08704	6.71781	6.73728	6.39678	6.44427		0.0047168	0.0548889		0.479817	0.289766		-0.321037	-0.293012
YPL052W	OAZ1	2.49057	2.53605	2.5008	2.0036	2.67582	2.67129	3.25096	3.24031		0.683859	0.055552		0.0102319	-0.532451		0.575146	0.569021
YLR208W	SEC13	5.96947	5.99752	5.98094	6.03254	6.06975	6.03606	5.61706	5.81044		0.974539	0.055552		0.0114664	0.0350235		-0.452682	-0.225621
YDR063W	AIM7	5.04045	4.98048	4.85599	5.03078	4.74147	4.6893	4.1102	4.24336		0.825244	0.0559365		-0.184464	0.0502951		-0.631271	-0.445935
YMR023C	MSS1	2.91265	2.84197	2.8953	3.18587	3.12433	3.25399	3.75702	3.54844		0.8305	0.0559365		-0.0173472	0.343893		0.632695	0.294447
GTK30N00100	GTK30N00100	4.50843	4.76447	4.74953	4.39369	5.09466	5.12391	5.39575	5.57622		0.827904	0.056103		0.241106	-0.370783		0.30109	0.452305
YDR235W	PRP42	3.38405	3.36036	3.22342	3.23113	3.50462	3.68032	3.95884	4.07211		0.577149	0.05612		-0.160627	-0.129239		0.454222	0.391781
YML088W	UFO1	3.33771	3.19377	3.5435	3.42089	3.97085	4.39985	4.67638	4.51349		0.535674	0.0571227		0.205785	0.227115		0.705527	0.113636
YPL215W	CBP3	5.12805	5.19889	5.31832	5.12763	4.78816	4.76713	4.52168	4.17233		0.970821	0.0571952		0.190271	-0.0712537		-0.266485	-0.594798
YOL097C	WRS1	5.67044	5.90929	5.75596	5.66959	5.66988	5.50811	5.35332	5.12557		0.613889	0.0574662		0.085512	-0.239699		-0.316554	-0.382543
YPL077C	YPL077C	2.22651	1.83592	2.63227	2.23266	2.58976	2.9486	3.51349	3.35473		0.627231	0.0575241		0.40576	0.396737		0.923727	0.406133
YGR121W-A	YGR121W-A	0.575312	-0.599462	1.37295	1.58015	1.42761	2.06695	2.90689	3.27501		0.485459	0.0575549		0.79764	2.17961		1.47928	1.20806
GTK30H00140	GTK30H00140	3.02857	3.06867	2.7137	2.85798	4.28614	3.78869	4.74578	4.5552		0.678511	0.0576485		-0.314873	-0.21069		0.459633	0.766517
YGL140C	YGL140C	5.25285	5.09719	5.35368	5.4165	6.0054	6.09233	6.30232	6.32769		0.346604	0.0576496		0.100822	0.319313		0.296919	0.235353
YKL131W	YKL131W	0.887525	0.722466	0.422233	0.31034	1.15056	0.790772	1.63227	2.62293		0.801076	0.057679		-0.465292	-0.412126		0.481709	1.83216
YLR073C	RFU1	5.59455	5.51412	5.95513	5.80813	5.12433	5.20984	4.78973	4.69321		0.113437	0.0576812		0.360578	0.294005		-0.334599	-0.516635
YPL012W	RRP12	4.91073	4.94626	5.1152	5.16471	4.64039	4.66903	4.42156	4.29793		0.298917	0.0578365		0.204467	0.218443		-0.21883	-0.371102
YER032W	FIR1	2.47768	2.29572	2.52356	2.50589	2.14405	1.96347	1.71809	1.4957		0.798464	0.0580575		0.0458846	0.210168		-0.425959	-0.467779
GTK30D02760	GTK30D02760	4.23189	4.15218	4.6153	4.55459	4.28096	4.32769	3.99729	3.94298		0.00901394	0.0581115		0.383405	0.402405		-0.283664	-0.384704
YPR151C	SUE1	-1.94342	-1.12029	-1.152	-1.94342	-2.12029	-0.0439433	1.23266	0.632268		0.985853	0.0581115		0.791413	-0.823122		3.35295	0.676212
YOR370C	MRS6	5.72901	5.75542	5.68229	5.62702	5.31976	5.29572	4.94626	5.04527		0.498971	0.0582896		-0.0467165	-0.128399		-0.373499	-0.250455
YLR112W	YLR112W	1.20163	2.45154	2.1177	2.08066	1.926	2.10769	3.08406	2.86196		0.985853	0.0595837		0.916061	-0.370883		1.15806	0.754267
YGR166W	TRS65	2.65764	2.51349	2.69822	2.8679	3.19061	3.4019	3.80219	3.74201		0.765993	0.0596998		0.0405785	0.354406		0.611578	0.340103
YKL094W	YJU3	7.66299	7.66491	7.52826	7.5552	8.08942	8.12846	8.36041	8.38262		0.322608	0.0599516		-0.13473	-0.109707		0.270984	0.254166
YNL168C	FMP41	5.27798	5.22304	5.337	5.54967	4.9991	4.83845	5.2555	5.40837		0.594889	0.060105		0.0590127	0.326633		0.256403	0.569925
YDL090C	RAM1	2.71809	2.91265	2.87774	2.58256	3.21568	3.10601	3.6427	3.64731		0.865498	0.0602144		0.159657	-0.330094		0.427023	0.541301
YPR103W	PRE2	5.76075	5.95327	5.97177	5.69042	6.12578	6.07039	5.75916	5.79831		0.884471	0.0602633		0.21102	-0.262848		-0.366619	-0.27208
YHL025W	SNF6	3.36597	3.57531	3.72028	3.79909	3.85997	3.66448	4.25776	4.21023		0.540854	0.0602789		0.354306	0.223775		0.397795	0.54575
YOR381W-A	YOR381W-A	-0.0588937	1.774	2.32193	0.941106	2.95791	3.93168	4.47054	4.46074		0.792133	0.060322		2.38082	-0.83289		1.51262	0.52906
YML112W	CTK3	4.27277	3.90497	4.08576	3.94673	3.8885	3.52482	4.45878	4.05311		0.835034	0.060322		-0.187005	0.0417651		0.570276	0.528295
YCL058W-A	ADF1	1.88362	2.09085	1.29866	0.970854	1.23266	0.704872	1.7137	2.31904		0.180751	0.0607242		-0.584963	-1.12		0.481035	1.61417
YDR251W	PAM1	5.16872	5.15745	5.22612	5.32912	5.76686	5.77952	6.03848	6.06803		0.777868	0.0607974		0.0574009	0.171676		0.27162	0.288503
YBR035C	PDX3	6.18269	6.29939	6.24546	6.0974	5.62644	6.12536	5.54442	5.39712		0.67683	0.060868		0.0627653	-0.201991		-0.0820156	-0.728243
YCR053W	THR4	8.2241	8.00006	8.17378	8.05626	8.27775	8.0621	7.94416	7.8431		0.912927	0.0611857		-0.0503211	0.056202		-0.333597	-0.218996
YDR318W	MCM21	1.39506	1.81558	1.38405	1.09085	1.1635	1.22033	1.93357	1.77821		0.442636	0.0613944		-0.011013	-0.724722		0.770074	0.557879
YDR478W	SNM1	3.72356	3.92125	3.63691	3.81558	4.04614	4.24413	4.77558	4.58316		0.827904	0.0613944		-0.086644	-0.10567		0.729436	0.339032
YGR218W	CRM1	6.05463	5.96023	6.1014	6.11437	6.26341	6.08491	6.5256	6.4165		0.827904	0.0615459		0.0467665	0.154133		0.262189	0.331587
YKL149C	DBR1	3.27053	3.40599	3.30597	3.37156	3.49953	3.74093	4.1334	4.07895		0.952055	0.0616444		0.0354416	-0.0344335		0.633872	0.338024
YDL049C	KNH1	5.77742	5.78477	5.57228	5.53201	5.1014	5.35509	4.70487	4.9397		0.106351	0.0616992		-0.205136	-0.252761		-0.396526	-0.41539
YMR306W	FKS3	3.30451	3.35191	3.80426	3.89142	4.70874	4.58556	4.96023	4.92315		6.41804e-05	0.0620024		0.499749	0.539508		0.251495	0.337586
YGL211W	NCS6	3.88362	3.8953	3.6241	3.78346	3.73335	3.84599	4.15704	4.31832		0.48476	0.0620153		-0.25952	-0.111846		0.423689	0.472325
YPL218W	SAR1	8.2872	8.64295	8.36045	8.02768	7.88362	7.44485	7.31886	7.3166		0.148782	0.0620689		0.0732476	-0.615269		-0.564762	-0.128251
YAL027W	SAW1	2.84197	2.83188	3.03562	2.24184	2.69153	2.70487	3.27501	3.38267		0.866035	0.062266		0.193651	-0.590037		0.583473	0.677795
YKL182W	FAS1	10.8465	10.587	10.6341	10.7689	10.4911	10.209	10.0605	10.018		0.847289	0.0622662		-0.212389	0.181902		-0.430598	-0.190931
YMR107W	SPG4	1.47508	0.31034	0.687061	0.475085	1.54597	1.59932	3.06695	2.34483		0.862378	0.0622662		-0.788024	0.164745		1.52098	0.745511
YIL027C	EMC5	5.7252	5.76129	5.48317	5.55612	5.04571	5.33485	4.62702	4.7845		0.263551	0.0623617		-0.242025	-0.205162		-0.418682	-0.55035
YPL099C	INA17	4.31759	4.43962	4.53792	4.90833	4.26978	4.54535	3.48671	4.08661		0.42925	0.062722		0.220324	0.468709		-0.783067	-0.458737
YLR316C	TAD3	1.28096	1.70044	0.613532	1.02857	1.04963	1.48027	2.20789	1.97085		0.27327	0.0628881		-0.667425	-0.671871		1.15826	0.490589
YDR391C	YDR391C	4.7761	4.84499	4.95745	4.78241	5.37504	5.3799	5.72928	5.81686		0.981507	0.0629213		0.181346	-0.0625796		0.354241	0.436957
YPL135W	ISU1	6.3818	6.18804	6.44659	6.33682	6.35984	6.85025	6.98641	7.02746		0.843213	0.0630576		0.0647846	0.148774		0.626574	0.177214
YJL158C	CIS3	9.38444	9.41952	9.21575	9.16704	9.66958	9.67495	9.87061	10.0139		0.0359363	0.0631127		-0.168687	-0.252476		0.201035	0.338957
YMR270C	RRN9	3.97177	4.01881	4.07468	3.71149	3.6792	4.32553	4.42828	4.65478		0.783238	0.0631127		0.102903	-0.307317		0.749078	0.329249
YHL003C	LAG1	5.29756	5.19298	5.34696	5.17393	4.84549	4.64443	4.42492	4.29646		0.978756	0.0631127		0.0493986	-0.0190562		-0.420568	-0.347976
YJL141C	YAK1	4.15381	3.98277	4.13504	4.25852	4.35473	4.19771	4.59574	4.65191		0.789472	0.0631698		-0.018763	0.275753		0.241008	0.454205
YML014W	TRM9	3.7866	4.16511	4.01614	3.75168	4.49953	4.40463	4.79494	4.97269		0.797629	0.0632187		0.229543	-0.41343		0.295409	0.568062
YML132W	COS3	5.35297	5.73742	5.61912	5.56682	6.31252	6.58195	6.80787	6.75556		0.985853	0.0632855		0.266149	-0.170601		0.49535	0.173602
YPR047W	MSF1	3.0321	2.81558	3.24641	3.21568	3.07724	3.43296	3.74631	3.64847		0.24829	0.0633453		0.214307	0.400103		0.66907	0.215506
YNL041C	COG6	3.57894	3.55213	3.9241	3.73118	3.53978	3.89724	3.44095	3.19061		0.283837	0.0634756		0.345161	0.179052		-0.098827	-0.706626
YNL283C	WSC2	5.43729	5.14975	5.52262	5.47151	6.21237	6.41752	6.64875	6.56788		0.476522	0.0635498		0.0853264	0.321766		0.436378	0.150365
YLR002C	NOC3	3.27798	3.46205	3.33056	3.45418	2.93546	3.14731	2.60881	2.55827		0.971743	0.0635498		0.0525737	-0.00787643		-0.326651	-0.589039
YBR291C	CTP1	3.13093	2.96532	3.46597	3.52356	3.32048	3.2555	4.01703	3.68594		0.279059	0.0636592		0.335044	0.558239		0.696546	0.430439
YAL014C	SYN8	5.17193	5.35509	5.30706	5.10056	5.15745	5.5097	5.67299	5.78869		0.789472	0.0640909		0.135137	-0.25453		0.515543	0.27899
YOL075C	YOL075C	5.14486	5.13463	5.11811	5.04963	4.14568	4.17073	4.54967	4.38888		0.657146	0.0642023		-0.0267516	-0.0850009		0.403992	0.218152
GTK30I00250	GTK30I00250	1.60881	1.26303	1.23266	0.495695	1.70929	1.1375	2.04264	2.36457		0.451621	0.0643788		-0.376148	-0.767339		0.333354	1.22707
YGL126W	SCS3	5.44824	5.64674	4.92029	4.86443	5.73579	6.04941	6.13175	6.4138		7.92863e-08	0.0643856		-0.527947	-0.782305		0.395961	0.364384
YDR520C	URC2	3.23879	3.35191	3.46728	3.60051	3.29572	3.10098	3.56925	3.7126		0.48476	0.0646032		0.228493	0.248597		0.273525	0.611618
YMR191W	SPG5	7.04745	7.04865	7.2407	7.03782	7.29278	7.24041	7.51562	7.56917		0.858372	0.0647183		0.193245	-0.0108289		0.222839	0.328762
YHR085W	IPI1	2.05658	2.23573	2.15704	2.45154	2.01436	2.58496	2.98003	3.05658		0.91927	0.0647472		0.10046	0.215814		0.96567	0.471621
YHR005C-A	TIM10	5.86344	6.3293	6.31288	5.92505	5.12805	5.02768	4.52168	4.51159		0.985853	0.0647879		0.44944	-0.404253		-0.606367	-0.51609
YJL124C	LSM1	6.17532	6.57183	6.07682	6.03826	5.55305	6.03716	5.34199	5.40769		0.0693081	0.0651029		-0.0985094	-0.533568		-0.211068	-0.62947
YFL034C-A	RPL22B	7.00282	6.68201	6.97808	6.79233	6.07916	5.92837	5.68201	5.47411		0.989631	0.0651273		-0.0247338	0.110323		-0.397153	-0.454259
YFR019W	FAB1	3.23113	3.26454	3.36317	3.49185	3.74308	3.73877	3.47249	3.44095		0.517691	0.0655698		0.132046	0.227317		-0.270596	-0.297816
YGR017W	YGR017W	5.01837	4.82018	5.08108	4.79961	4.51602	4.94813	4.30305	4.29352		0.985853	0.0657054		0.0627168	-0.0205735		-0.212965	-0.654616
YBR109W-A	YBR109W-A	1.51602	0.933573	1.90304	1.11103	0.948601	1.42223	2.11103	3.10098		0.909755	0.0662403		0.387023	0.177459		1.16243	1.67874
YLR056W	ERG3	7.78457	7.62666	7.97968	7.77433	8.50379	8.41143	8.72829	8.71795		0.540242	0.0662613		0.195113	0.147668		0.224509	0.306524
YJL188C	BUD19	4.22882	4.62176	2.85997	2.23573	0.910733	1.28688	2.23879	2.64386		2.00388e-06	0.066642		-1.36885	-2.38603		1.32805	1.35698
YML001W	YPT7	5.29572	5.45779	5.02813	4.852	4.5601	4.73877	4.29499	4.05918		0.0104564	0.0670437		-0.267596	-0.605792		-0.265115	-0.679586
YER152W-A	YER152W-A	1.50589	1.33914	-1.02915	-1.78588	0.0285692	0.678072	1	2.18269		0.00391892	0.0671829		-2.53504	-3.12501		0.971431	1.50462
YJL038C	LOH1	0.545968	1.70487	0.575312	-0.454032	0.400538	0.678072	1.97453	1.42223		0.254736	0.0677364		0.029344	-2.1589		1.57399	0.744161
YKL110C	KTI12	4.39369	4.58916	4.83592	4.54473	4.46074	4.56621	4.94345	4.8674		0.634574	0.0677364		0.442233	-0.0444316		0.48271	0.301196
YPR097W	YPR097W	4.98277	4.89724	5.0635	5.12598	4.97361	4.93593	4.70487	4.64443		0.57355	0.0679536		0.0807375	0.228741		-0.268739	-0.291498
YHR200W	RPN10	5.20555	5.65335	5.60348	5.31687	5.27873	5.92434	5.0751	5.25776		0.985853	0.0679536		0.397929	-0.336477		-0.203623	-0.666572
YAL037W	YAL037W	1.76553	1.32193	1.80323	1.0072	0.695994	0.910733	1.85997	1.76553		0.952055	0.0687083		0.0376923	-0.314733		1.16398	0.854802
YIL034C	CAP2	7.14944	6.96475	7.25522	7.34509	7.19022	6.9493	6.81788	6.71905		0.237088	0.068846		0.105775	0.38035		-0.372341	-0.230255
YGL241W	KAP114	3.1127	3.22959	3.18745	3.25399	3.35755	3.19377	2.97085	2.80529		0.989252	0.069147		0.0747509	0.0244013		-0.386698	-0.388479
YDR017C	KCS1	3.75275	3.80941	3.88264	3.79597	3.34625	3.58015	3.10936	3.09085		0.978521	0.0691916		0.129894	-0.0134398		-0.236887	-0.489292
YIR012W	SQT1	4.849	4.85848	4.75649	4.9279	5.07895	5.43962	5.60288	5.69321		0.897098	0.0692234		-0.0925088	0.0694181		0.523933	0.253585
YNR016C	ACC1	10.3018	9.96472	10.0049	10.093	9.82499	9.93114	9.60968	9.62823		0.567696	0.069266		-0.296938	0.128279		-0.215313	-0.30291
YFL027C	GYP8	3.54102	3.70708	3.73552	3.82477	3.76447	3.90111	4.22882	4.21878		0.792437	0.0696955		0.194503	0.117685		0.464345	0.317673
YIR034C	LYS1	5.14119	5.10476	5.8189	5.73227	5.4663	5.23381	5.73471	5.68117		1.30934e-07	0.0698126		0.677714	0.627513		0.268409	0.447357
YNL311C	SKP2	2.62761	2.30743	2.37851	2.44095	3.23726	3.28392	3.77716	3.58496		0.865498	0.0701264		-0.249095	0.133524		0.539899	0.301041
YMR054W	STV1	4.8475	5	4.76022	4.62117	4.95327	4.42626	5.07639	5.17632		0.0635674	0.0703462		-0.0872749	-0.378827		0.123123	0.750058
YJR007W	SUI2	5.77847	5.8392	5.96185	5.97888	5.27352	5.62293	5.20867	4.90111		0.60831	0.0704818		0.183383	0.139678		-0.0648426	-0.721822
YDR268W	MSW1	2.98368	3.17951	3.0635	3.33199	2.95606	2.60644	3.33342	3.36457		0.936215	0.0704818		0.0798252	0.152481		0.377367	0.75813
YJR001W	AVT1	5.79051	5.61088	5.42593	5.33914	5.73444	5.20359	5.87799	5.92196		0.00480012	0.0707722		-0.364582	-0.27174		0.143551	0.718367
YPL134C	ODC1	4.0798	4.32193	4.43496	4.12928	3.91456	4.07125	3.62293	3.41819		0.950887	0.0707722		0.355157	-0.192645		-0.291634	-0.653058
YPR165W	RHO1	6.77965	6.86022	6.72914	6.75862	6.90617	7.06663	7.27352	7.28744		0.579443	0.0710737		-0.0505088	-0.101595		0.367347	0.220808
YHR149C	SKG6	4.4957	4.10266	4.40735	4.45418	3.96255	3.75916	3.49057	3.48027		0.835813	0.0710737		-0.0883424	0.351518		-0.471979	-0.278891
YBR221C	PDB1	8.19042	8.00006	8.17697	8.08156	7.92979	8.11925	7.81288	7.73836		0.985853	0.0711683		-0.0134464	0.081507		-0.116908	-0.38089
YJL194W	CDC6	3.23266	3.68257	3.66903	3.73444	3.20477	3.27501	3.69153	3.65764		0.659082	0.0712396		0.436366	0.0518654		0.486767	0.382633
YNL252C	MRPL17	4.90063	4.86691	5.05007	4.74147	4.48929	4.41886	4.05745	3.99729		0.985853	0.0713273		0.149441	-0.125441		-0.431836	-0.421572
YMR055C	BUB2	4.25172	3.91839	3.47379	3.91552	4.33342	4.68426	4.8495	5.01346		0.193571	0.071487		-0.777932	-0.00286533		0.516075	0.329205
YER159C	BUR6	6.38681	6.33914	6.53029	6.24298	6.26191	6.2666	6.51317	6.73417		0.988655	0.0716619		0.143478	-0.0961539		0.251268	0.467568
YAL067C	SEO1	4.41414	4.44824	4.63517	4.75649	4.41414	3.86394	3.58376	3.78764		0.257629	0.0717151		0.221038	0.308249		-0.830376	-0.076297
YBR115C	LYS2	6.17433	6.06458	6.34181	6.29719	5.75782	5.73985	5.49633	5.50621		0.33256	0.0718244		0.167481	0.23261		-0.261489	-0.23364
YIL157C	COA1	6.07639	6.37712	6.44758	6.4888	5.80529	5.74335	5.45582	5.37226		0.431158	0.0718591		0.371191	0.11168		-0.349472	-0.371098
YPR133W-A	TOM5	7.08449	6.90773	7.36501	7.18795	7.10276	7.14914	7.57357	7.45557		0.343025	0.0722285		0.280521	0.280214		0.470808	0.306436
YOL091W	SPO21	0.956057	1.1375	1.75275	0.411426	2.09761	2.01436	1.45418	1.44361		0.916765	0.0722752		0.796692	-0.726077		-0.643435	-0.570749
YHR013C	ARD1	4.32048	4.77716	4.55152	4.06005	3.94205	3.97911	3.27947	3.57168		0.516785	0.0730784		0.231031	-0.717109		-0.662574	-0.407434
YPR009W	SUT2	4.99548	5.09972	4.78188	4.58195	4.78973	4.83238	5.33914	5.14731		0.0954707	0.0730806		-0.2136	-0.517762		0.549408	0.314923
YMR018W	YMR018W	-1.68966	-1.12029	-0.454032	-1.25154	-0.415037	-0.761213	0.443607	0.641546		0.778044	0.0730806		1.23563	-0.131245		0.858644	1.40276
YBR252W	DUT1	4.49057	4.37086	4.14323	4.40054	4.16752	3.90111	3.30012	3.48929		0.708865	0.0731491		-0.34734	0.0296762		-0.867395	-0.411822
YGR071C	ENV11	3.80323	3.59813	3.97085	3.87184	3.23726	3.16832	2.88753	2.70929		0.43637	0.0734662		0.167627	0.273717		-0.349733	-0.45903
YMR294W	JNM1	1.15056	1.1177	1.37851	1.24489	0.176323	1.22651	1.65535	1.47508		0.866269	0.0734861		0.227952	0.127192		1.47903	0.248576
YGL194C-A	YGL194C-A	4.76341	4.56194	4.56316	4.62117	4.20945	4.59694	3.87381	3.40463		0.898076	0.0734968		-0.200253	0.0592357		-0.33564	-1.1923
YPL178W	CBC2	5.06091	5.02237	4.83845	4.92695	4.57471	4.94439	4.21645	4.37712		0.480398	0.0738068		-0.222464	-0.0954196		-0.358252	-0.567266
YMR102C	YMR102C	3.35332	3.23266	3.22342	3.22651	4.26454	4.45352	4.69933	4.70764		0.760244	0.0747879		-0.129901	-0.00615223		0.434793	0.254118
YNL131W	TOM22	7.59947	7.68032	7.66107	7.63401	6.72165	7.00529	6.54117	6.54767		0.919291	0.074839		0.0615989	-0.046312		-0.180472	-0.457622
YMR247C	RKR1	4.55336	4.5472	4.40735	4.46597	4.24945	4.0917	3.93168	3.81352		0.365631	0.0748627		-0.146008	-0.0812286		-0.317762	-0.278175
YDL087C	LUC7	2.71149	3.19061	2.93923	2.848	3.58376	3.97545	4.4489	4.1375		0.893309	0.0748627		0.227732	-0.342618		0.865141	0.162057
YGL080W	MPC1	7.05658	6.8999	7.10832	7.07157	6.75168	6.83251	6.57879	6.3107		0.814534	0.0750686		0.0517318	0.171669		-0.17289	-0.521807
YPL233W	NSL1	4.21335	4.12267	3.91361	3.848	4.82222	5.51948	5.57743	5.88362		0.358567	0.0751499		-0.29974	-0.274676		0.755209	0.364142
YNL124W	NAF1	4.16672	3.86394	4.35473	4.0917	5.18507	5.73118	5.85025	5.8515		0.588526	0.0754886		0.188019	0.227761		0.665176	0.120316
YGR089W	NNF2	4.76394	4.53978	4.75168	4.87578	4.70764	4.98504	4.63865	4.42895		0.623252	0.0757381		-0.0122647	0.336001		-0.0689821	-0.556099
YNL268W	LYP1	5.76898	5.80452	5.35966	5.34944	6.10601	6.23189	6.3672	6.53138		9.63281e-06	0.0757452		-0.409317	-0.455082		0.261183	0.299488
YDR278C	YDR278C	0.0143553	-1.152	-1.18442	-0.971431	-1.12029	-1.08927	1.3505	1.01436		0.888184	0.0758044		-1.19878	0.180572		2.47079	2.10362
YER043C	SAH1	9.85172	9.76177	9.75642	9.79602	9.90518	9.73981	9.60326	9.51946		0.747238	0.0760035		-0.0952949	0.0342561		-0.301921	-0.220355
YBL020W	RFT1	6.31976	6.20555	6.38094	6.31234	6.54936	6.46434	6.79377	6.76673		0.888184	0.0760035		0.0611748	0.10679		0.244405	0.302386
YFL007W	BLM10	4.08661	3.94017	4.19692	4.2502	4.26529	4.00988	3.80426	3.87578		0.32824	0.0760064		0.110308	0.310037		-0.461027	-0.134105
YMR209C	YMR209C	3.41414	3.16672	3.58856	3.27053	3.46989	3.45681	4.16269	3.68594		0.83389	0.0761375		0.174429	0.103813		0.692807	0.229134
YMR081C	ISF1	6.66704	6.58646	6.9397	6.88582	5.56071	5.48478	5.24982	5.14649		0.0596771	0.0762053		0.272656	0.299354		-0.31089	-0.33829
YPR156C	TPO3	5.27314	5.1235	5.19338	5.08364	6.12763	5.90569	6.26866	6.38595		0.697851	0.0771907		-0.0797653	-0.0398618		0.141026	0.480261
YPL235W	RVB2	4.95047	5.00135	5.1981	5.1639	5.07039	5.13955	4.7845	4.80426		0.424229	0.0774539		0.247633	0.162549		-0.285885	-0.335291
YPL141C	FRK1	3.8885	3.74631	4.18428	3.85798	3.72574	4.19692	3.488	3.66562		0.50985	0.0774539		0.295781	0.111668		-0.23774	-0.531302
YOR164C	GET4	6.34447	6.32625	6.39506	6.51444	6.11582	6.13627	5.79051	5.87209		0.765508	0.0774539		0.0505893	0.188188		-0.325313	-0.264183
YBL037W	APL3	4.58496	4.42626	4.78607	4.79909	4.30012	4.11603	3.8125	3.9514		0.0977066	0.0776051		0.201111	0.372823		-0.487625	-0.164631
YAR061W	YAR061W	2.24184	2.29866	2.91839	2.47249	1.82782	1.15056	2.98914	2.82579		0.789472	0.0776051		0.676546	0.173829		1.16132	1.67523
YBR146W	MRPS9	6.31506	6.36894	6.63822	6.54659	6.11873	6.04308	5.71754	5.81992		0.169245	0.077694		0.32316	0.177643		-0.401194	-0.223158
YKR027W	BCH2	4.45943	4.52231	4.62994	4.7021	4.38059	4.08746	3.88753	3.87774		0.558406	0.078627		0.170508	0.179797		-0.493066	-0.209719
YDL093W	PMT5	6.25361	6.23458	6.09656	6.0217	7.31415	7.24812	7.01592	7.06781		0.103352	0.0795423		-0.157054	-0.212876		-0.298236	-0.180307
YNL029C	KTR5	3.53481	3.33056	3.28244	3.27501	3.04089	3.0635	3.66562	3.34341		0.574028	0.0795656		-0.252369	-0.0555514		0.624728	0.279905
Q0075	AI5_BETA	5.40224	5.50875	5.86022	5.62147	5.81839	6.09908	5.56224	5.72574		0.167398	0.0798228		0.457973	0.11272		-0.256148	-0.373344
YIL102C-A	YIL102C-A	4.81967	5.44062	5.54566	5.45812	5.72247	5.53294	5.96555	6.26454		0.58329	0.0799809		0.725991	0.0174994		0.243087	0.731596
YIR035C	YIR035C	3	3.10936	2.76129	2.9279	3.50843	3.99729	4.29866	4.24184		0.675316	0.0799809		-0.238715	-0.181464		0.79023	0.244548
YFR013W	IOC3	3.73877	3.71918	3.92315	3.78031	3.76129	3.76447	3.44493	3.3799		0.790944	0.0802683		0.184381	0.0611267		-0.316353	-0.384575
YDR101C	ARX1	5.60822	5.42122	5.6372	5.5738	5.15583	4.8679	4.75435	4.59096		0.881575	0.0805088		0.0289866	0.152575		-0.401477	-0.276935
YLL036C	PRP19	3.9782	3.91552	3.91743	3.82985	4.1416	4.49442	4.75969	4.64328		0.75652	0.0808662		-0.0607639	-0.0856713		0.618092	0.148863
YGL019W	CKB1	6.12536	6.17373	6.18963	6.09128	5.70487	5.53325	5.24489	5.3067		0.888184	0.0808662		0.0642651	-0.0824504		-0.459985	-0.226552
YDL042C	SIR2	3.95699	3.80116	3.9782	3.90014	3.84197	3.73335	3.41143	3.37573		0.976697	0.0808732		0.0212097	0.0989836		-0.430547	-0.35762
YHR023W	MYO1	3.46858	3.30012	3.53605	3.25248	3.24336	3.39232	3.0197	3.01614		0.976694	0.0810914		0.0674696	-0.0476475		-0.223663	-0.376178
YKL016C	ATP7	7.58909	7.89875	8.07596	8.01826	6.42945	6.96197	6.49281	6.08108		0.157809	0.0815395		0.486871	0.119503		0.063366	-0.880887
YLR378C	SEC61	8.03914	7.85761	7.75201	7.80768	8.63379	8.85677	8.94723	9.08677		0.18609	0.0815395		-0.287126	-0.0499309		0.313433	0.230005
YMR163C	INP2	2.9542	2.91073	2.96532	2.94673	2.62293	2.75702	2.19849	2.25701		0.985853	0.0816788		0.0111262	0.0359982		-0.424436	-0.500013
YJL149W	DAS1	3.44758	3.48156	3.81455	3.77716	4.15137	3.84599	4.49313	4.30012		0.157152	0.081772		0.366971	0.295599		0.341763	0.454132
YIL095W	PRK1	3.46597	3.29131	3.51854	3.50589	3.96532	4.17792	4.36667	4.43829		0.793332	0.081772		0.0525607	0.214582		0.401349	0.260375
GTK30E00170	GTK30E00170	5.13668	5.12184	5.15178	5.14241	4.8846	5.2149	4.37086	4.7761		0.983145	0.081772		0.0150941	0.0205691		-0.513736	-0.438798
YKR053C	YSR3	6.74389	6.81468	6.65693	6.70846	8.03551	8.36321	8.43721	8.53683		0.460742	0.082667		-0.0869666	-0.106215		0.401697	0.173615
YPL253C	VIK1	2.10769	2.07382	1.45418	2.14078	1.74846	2.24184	1.16993	1.53605		0.613614	0.082667		-0.653512	0.0669584		-0.578536	-0.705787
YGR143W	SKN1	5.46172	5.16511	5.53232	5.49025	5.22689	5.03078	5.46761	5.40939		0.478369	0.083165		0.070592	0.325141		0.240712	0.378613
YHR043C	DOG2	4.08236	4.65421	4.29793	4.22959	3.87578	4.27277	3.68818	3.43962		0.723029	0.0831694		0.215563	-0.424618		-0.1876	-0.833147
YPR085C	ASA1	1.64155	2.0635	1.59932	1.90304	1.62761	1.27501	1.90689	2.13093		0.803478	0.0831776		-0.0422282	-0.160465		0.279284	0.855924
YHR172W	SPC97	3.30743	3.17951	3.09761	3.27501	2.66448	2.90689	2.37016	2.34199		0.80812	0.0837402		-0.209818	0.095496		-0.294319	-0.564905
YLR084C	RAX2	4.37156	4.32625	4.50589	4.44361	4.04527	3.93263	3.64039	3.72356		0.712689	0.0839861		0.134332	0.117357		-0.404879	-0.20907
YHR034C	PIH1	1.89142	2.6017	2.5656	2.01436	2.40327	2.60407	3.12267	3.03386		0.985853	0.0839861		0.674178	-0.587341		0.719405	0.429792
YHL039W	EFM1	5.10559	5.10308	5.27277	5.2817	5.08364	5.17433	4.86295	4.80684		0.524809	0.0839869		0.167175	0.17862		-0.220692	-0.367487
YJL053W	PEP8	4.79077	4.75862	4.77663	4.88264	4.67638	4.6893	4.26078	4.38405		0.985853	0.0839869		-0.0141416	0.12402		-0.415602	-0.305249
YNL278W	CAF120	4.05224	3.74846	3.9782	3.85	4.37365	4.36877	4.64559	4.68201		0.964811	0.0846901		-0.0740464	0.101538		0.271938	0.313243
YDR255C	RMD5	4.37365	4.25172	4.4614	4.52231	4.86295	4.93074	4.52482	4.60051		0.640407	0.0848162		0.0877494	0.270588		-0.338131	-0.33023
YDR529C	QCR7	7.78188	7.64357	8.12866	8.10936	6.32319	6.76009	6.33163	5.89409		0.00199426	0.0848664		0.34678	0.465793		0.00844367	-0.865998
YBR084W	MIS1	5.17033	4.9982	4.94111	4.96578	4.89093	4.87086	4.62761	4.58856		0.334854	0.0852815		-0.229219	-0.0324112		-0.263326	-0.282293
YJL148W	RPA34	4.74578	4.79701	5.07596	4.76394	3.9542	4.24031	3.63923	3.5741		0.75914	0.0856568		0.330185	-0.0330703		-0.314964	-0.666213
YPR015C	YPR015C	6.04418	6.08937	6.33949	6.6178	6.32409	5.97361	6.49346	6.53823		0.023114	0.0857143		0.295318	0.528427		0.169365	0.564616
YDR083W	RRP8	2.16027	2.30159	2.53605	2.38405	1.91839	1.87971	2.56071	2.24184		0.650393	0.0858941		0.375778	0.0824622		0.642329	0.362134
YLR247C	IRC20	3.68818	3.63691	3.78031	3.66676	4.34199	4.58616	4.76818	4.73769		0.962117	0.0859778		0.0921297	0.029842		0.426199	0.151523
YJL176C	SWI3	3.91361	3.79701	3.9644	3.63923	3.76977	4.26529	3.66448	3.63227		0.839955	0.0865981		0.0507911	-0.157781		-0.105289	-0.633019
YDR482C	CWC21	3.41278	3.3505	3.62761	3.18745	3.26303	3.92125	4.39438	4.14893		0.985853	0.0870113		0.214825	-0.163046		1.13134	0.227688
YDR146C	SWI5	3.74953	3.59216	3.68818	3.30305	2.58256	3.46597	2.37016	2.61353		0.53294	0.0872481		-0.0613539	-0.289108		-0.212392	-0.852443
YNL230C	ELA1	2.76129	2.94111	2.64847	3.08916	3.13422	3.54102	4.04264	3.63343		0.985853	0.0874399		-0.11282	0.148053		0.908423	0.0924121
YDR436W	PPZ2	3.81865	4.01346	3.9486	3.81762	3.25096	3.67016	3.84298	3.89239		0.8374	0.0874709		0.129955	-0.195839		0.592017	0.222231
YFR025C	HIS2	4.12184	4.3067	4.25096	4.30232	4.1102	4.40871	3.77083	3.90689		0.985853	0.0880002		0.129117	-0.00438066		-0.339367	-0.501821
YNL046W	YNL046W	3.86592	3.7301	3.75489	3.60288	4.26903	4.59216	4.65935	5.22843		0.83389	0.0883999		-0.111031	-0.127212		0.390321	0.636276
YFL037W	TUB2	7.78378	7.71822	7.6844	7.54017	7.20006	7.1983	6.99842	6.91767		0.275086	0.0885801		-0.099386	-0.178058		-0.201644	-0.280627
YHR169W	DBP8	3.38267	3.42492	3.6241	3.42358	3.80632	4.47444	4.56133	4.68986		0.876776	0.0890588		0.241434	-0.00134392		0.755002	0.215422
YHL004W	MRP4	5.06824	5.13422	5.14405	5.42995	4.90014	4.8268	4.57168	4.46728		0.61127	0.0891047		0.0758055	0.29573		-0.328465	-0.359523
YGR264C	MES1	6.40548	6.29002	6.46271	6.51017	6.17772	6.06846	5.89482	5.84423		0.658499	0.0896412		0.0572249	0.220152		-0.282901	-0.224221
YER118C	SHO1	4.97682	5.02813	5.12019	4.93546	4.89821	5.17233	4.70653	4.68032		0.985853	0.0896412		0.143364	-0.0926673		-0.191678	-0.492003
YCR036W	RBK1	4.32769	4.36667	4.42895	4.27501	4.49697	4.96855	5.18428	5.10224		0.964219	0.0897879		0.101259	-0.0916649		0.687307	0.133687
YOR316C-A	YOR316C-A	0.613532	1.4489	1	1.62293	1.7866	2.33056	-0.37707	0.613532		0.971653	0.0897879		0.386468	0.174029		-2.16367	-1.71703
YBL100W-C	YBL100W-C	2.74631	3.71809	1.80735	2.43029	3.08066	3.1375	0.432959	2.0072		0.281432	0.0901595		-0.938958	-1.2878		-2.6477	-1.13031
YMR264W	CUE1	7.66945	7.58188	7.7139	7.8242	7.40267	7.46703	7.25663	7.0662		0.642908	0.0901696		0.04445	0.242317		-0.146038	-0.400838
YGR044C	RME1	5.88704	5.77268	5.71287	5.90617	5.50112	5.7126	5.30852	5.2724		0.87293	0.0901709		-0.174167	0.133492		-0.1926	-0.440199
YHL032C	GUT1	5.66192	5.49217	5.47054	5.51854	4.63517	4.70377	4.2765	4.44758		0.552505	0.0901945		-0.191384	0.0263615		-0.358677	-0.256186
YOL145C	CTR9	4.13093	4.19928	4.22651	3.94017	4.22882	4.10098	3.90881	3.81455		0.680052	0.0902214		0.0955777	-0.259113		-0.320006	-0.286427
YPL194W	DDC1	2.24184	2.27501	2.06695	2.32481	2.03562	2.29866	1.70487	1.48543		0.888184	0.0902214		-0.17489	0.0498036		-0.330752	-0.813231
YER080W	AIM9	4.82629	4.85549	4.79025	4.97682	4.82833	4.9644	4.69766	4.46663		0.995083	0.0903489		-0.0360435	0.12133		-0.130664	-0.497772
YOL084W	PHM7	2.53356	2	2.47508	2.86394	4.24108	4.15704	4.46205	4.55152		0.348875	0.090351		-0.0584785	0.863938		0.220975	0.394472
YNL062C	GCD10	3.7845	3.82579	3.71809	4.16993	3.59813	4.11437	3.29278	3.52732		0.836695	0.0904908		-0.0664164	0.344139		-0.305345	-0.587046
YER065C	ICL1	3.65535	3.42223	3.69711	3.60526	3.29131	3.8125	3.22959	2.95977		0.876232	0.0905469		0.0417547	0.183024		-0.0617209	-0.852728
YLR118C	YLR118C	5.45976	5.59902	5.50048	5.51128	5.53076	5.05702	5.79779	5.67948		0.857293	0.0906584		0.0407239	-0.0877419		0.267034	0.622463
YAR023C	YAR023C	3.77716	3.58015	3.48027	2.84398	3.62761	2.61824	4.09508	3.80735		0.321375	0.0907006		-0.296892	-0.736162		0.467474	1.18912
YGR184C	UBR1	5.46041	5.40088	5.59276	5.61206	5.7137	5.44526	5.31615	5.31506		0.460742	0.0911225		0.132341	0.211178		-0.39755	-0.130204
YGR136W	LSB1	4.4121	4.75916	4.74578	4.78712	5.02503	5.31759	5.52168	5.5601		0.783238	0.0912265		0.333671	0.0279631		0.49665	0.24251
YML023C	NSE5	4.65191	4.50843	4.55827	4.4822	4.34412	4.10769	3.80219	3.91743		0.747621	0.0913675		-0.0936451	-0.0262257		-0.541925	-0.190256
YLR090W	XDJ1	3.47379	3.35191	3.60999	3.26754	3.42492	3.42358	3.76977	3.91361		0.988989	0.0913675		0.136204	-0.0843752		0.34485	0.490029
YBR261C	TAE1	4.25626	4.40259	4.28096	4.42694	4.01614	4.62059	3.61824	3.96717		0.985853	0.0913853		0.0247004	0.0243499		-0.397901	-0.653418
YDR368W	YPR1	5.79103	5.84097	5.70266	5.78372	5.8902	5.36737	5.23228	5.26791		0.630103	0.0918505		-0.0883751	-0.0572481		-0.657926	-0.0994608
YPL249C	GYP5	2.5656	2.6893	2.73552	2.48027	2.85	2.58256	3.20163	3.08406		0.93417	0.0918505		0.169925	-0.209034		0.351635	0.501508
YKL057C	NUP120	5.13955	5.07639	5.35579	5.42391	5.0063	4.69544	4.56133	4.53854		0.0793964	0.0922294		0.21624	0.347526		-0.444972	-0.156899
YHR198C	AIM18	6.4733	6.64371	6.40939	6.49057	6.76368	6.9216	7.03749	7.20672		0.44525	0.0922294		-0.0639089	-0.153142		0.273815	0.285118
YOL136C	PFK27	7.65112	7.59634	7.69766	7.59999	6.95443	6.82553	6.62337	6.64299		0.985609	0.0928232		0.0465392	0.00364834		-0.33106	-0.182541
YLL014W	EMC6	5.79779	6.0974	5.78869	5.58346	5.80452	5.49825	6.21471	5.97613		0.271084	0.0931457		-0.00910549	-0.513941		0.410189	0.477884
YLR196W	PWP1	4.61235	4.62702	4.79077	4.68257	4.36527	4.80993	4.2891	4.18666		0.790944	0.0931457		0.17842	0.0555502		-0.0761759	-0.62327
GTK30J00230	GTK30J00230	4.58256	4.47573	4.53419	4.50589	4.5008	4.62702	4.82171	4.92695		0.897562	0.0931457		-0.0483699	0.0301575		0.320908	0.299925
YML115C	VAN1	4.58075	4.72846	4.765	4.58676	4.49506	4.66221	4.89772	4.90207		0.985609	0.0931457		0.184256	-0.1417		0.402669	0.239868
YPL057C	SUR1	8.11431	7.85611	8.03116	8.04177	8.43671	8.54261	8.7447	8.71046		0.985853	0.0931457		-0.0831514	0.185654		0.307988	0.167856
YOR217W	RFC1	4.20867	4.26303	4.10685	4.14975	4.17473	4.19456	3.87283	3.89336		0.486145	0.0932387		-0.101823	-0.113287		-0.301897	-0.301198
YMR180C	CTL1	2.91073	2.68032	2.71149	2.63459	2.55336	2.71809	3.18269	3.19849		0.832639	0.0933013		-0.199238	-0.0457311		0.629332	0.480407
YKL186C	MTR2	5.31252	5.27761	5.54566	5.12722	5.76447	6.06867	6.3572	6.18448		0.9854	0.0933344		0.23314	-0.150392		0.592727	0.115808
YFR032C-B	YFR032C-B	3.87086	3.0268	2.7866	2.61353	3.38405	3.27947	2.10098	2.60644		0.275086	0.0933374		-1.08426	-0.413268		-1.28307	-0.673029
YKR011C	YKR011C	3.54473	3.30305	3.81967	3.65878	3.80012	3.59335	3.37434	3.05832		0.420915	0.093539		0.274936	0.355733		-0.425779	-0.535037
YMR027W	YMR027W	5.76102	5.87553	5.7666	5.7301	5.4266	5.1981	4.93546	5.05441		0.605378	0.0939071		0.0055759	-0.145438		-0.49114	-0.143687
YIL108W	YIL108W	5.05572	5.0148	5.09508	5.05181	5.75034	5.61383	5.88289	6.06415		0.995083	0.093913		0.0393642	0.0370055		0.132549	0.450324
YGR159C	NSR1	6.7211	6.73688	6.14445	5.98322	5.72192	5.67582	5.51191	5.27947		2.20165e-12	0.09414		-0.576645	-0.753654		-0.210009	-0.396345
YHR024C	MAS2	5.07296	5.02636	5.12557	5.18468	5.02813	5.03034	5.30597	5.36352		0.8374	0.094467		0.0526052	0.15832		0.277843	0.333185
YDL206W	YDL206W	4.81044	4.72574	4.88899	4.80941	5.08066	5.26078	5.3978	5.51096		0.90164	0.0952036		0.0785436	0.0836733		0.317145	0.250183
YGR105W	VMA21	6.81788	7.12763	6.88947	6.90099	6.58601	7.38853	6.57728	6.51412		0.70007	0.0953672		0.0715945	-0.226646		-0.00873633	-0.874412
YDR244W	PEX5	2.82579	2.42761	2.62527	3.06178	2.67582	2.81762	3.34056	3.03914		0.757412	0.0953672		-0.200515	0.63417		0.664746	0.221515
YMR295C	YMR295C	6.78529	6.8426	6.77729	6.86059	7.08236	7.2937	7.48671	7.45253		0.91784	0.0955094		-0.00800078	0.0179886		0.404352	0.158828
YKR082W	NUP133	4.48091	4.52168	4.59216	4.64847	4.29425	4.68594	4.26303	4.10182		0.762358	0.0955837		0.111247	0.126786		-0.0312187	-0.584122
YCL054W	SPB1	3.43696	3.23726	3.50716	3.13258	2.91073	3.39369	2.83188	2.62761		0.952061	0.0955837		0.070199	-0.104681		-0.0788554	-0.766084
YDR195W	REF2	2.93357	2.42761	3.12928	2.92029	3.20633	3.27798	3.61235	3.6837		0.472442	0.0957471		0.19571	0.492687		0.406022	0.405712
YMR257C	PET111	4.32193	4.18982	4.58796	4.45746	3.84298	3.85599	3.53356	3.50589		0.187072	0.0962206		0.266037	0.267638		-0.309415	-0.350099
YLR092W	SUL2	6.62191	6.50144	6.67143	6.62103	6.62804	6.84612	6.4872	6.51759		0.888184	0.0962206		0.0495296	0.119587		-0.140848	-0.328527
YKR092C	SRP40	4.82273	4.7366	4.765	4.81506	4.22959	4.84599	4.22188	4.01167		0.95308	0.0962418		-0.0577259	0.0784581		-0.00771084	-0.834317
YER165W	PAB1	8.81513	8.83147	8.58071	8.53255	8.50752	8.60563	8.33159	8.33713		0.00291475	0.0964426		-0.234416	-0.298915		-0.175928	-0.268496
YDL208W	NHP2	3.89821	3.9644	4.17473	3.98094	3.41414	3.851	3.19061	3.10098		0.801076	0.0964426		0.276518	0.0165406		-0.223521	-0.750022
YCR065W	HCM1	4.72792	4.59813	4.98459	4.90881	4.22805	4.07211	3.67807	3.88753		0.142781	0.0964773		0.256669	0.310686		-0.549977	-0.184581
YPL119C-A	YPL119C-A	2.66448	2.38405	2.22342	2.67129	1.81558	1.45418	2.55827	2.86987		0.952389	0.0964773		-0.44106	0.287244		0.742692	1.4157
YMR089C	YTA12	4.15866	4.05485	4.14568	4.12763	3.88264	4.16108	3.72901	3.65421		0.985853	0.0964773		-0.0129827	0.0727848		-0.153634	-0.506875
YBR112C	CYC8	4.72629	4.59335	4.93404	4.8515	4.50779	4.75114	4.35614	4.33485		0.239028	0.096652		0.207758	0.258145		-0.151651	-0.416288
YGR008C	STF2	6.82018	6.78542	6.65978	6.7174	6.28392	6.6768	5.92979	6.19298		0.565245	0.0970592		-0.160397	-0.0680175		-0.354131	-0.48382
YIR033W	MGA2	6.66519	6.61029	6.56803	6.62103	6.6011	6.62542	6.34607	6.42844		0.714746	0.0971609		-0.0971617	0.0107395		-0.255032	-0.196973
YLR106C	MDN1	4.78084	4.46009	4.58616	4.57471	4.53107	4.26228	4.15218	4.12516		0.770899	0.0979952		-0.194671	0.11462		-0.378886	-0.137128
YOR380W	RDR1	2.62761	2.15704	2.47249	2.72247	2.83996	2.70487	3.25852	3.18745		0.82301	0.0979952		-0.155119	0.565422		0.418559	0.482579
GTK30K00190	GTK30K00190	4.07639	4.04614	4.51979	4.31542	4.25096	4.60644	4.9607	4.62469		0.0647083	0.0981566		0.443405	0.26928		0.709735	0.0182436
YJR005W	APL1	4.74362	4.67751	5.07253	5.08958	4.67751	4.63285	4.43563	4.27947		0.0113828	0.0984889		0.328912	0.412075		-0.24188	-0.353379
GTK30H02330	GTK30H02330	1.73118	1.5656	-0.268817	1.25096	-0.217591	-0.168123	1.52105	1.51096		0.428155	0.0984889		-2	-0.314636		1.73864	1.67908
YOL051W	GAL11	4.65478	4.41752	4.79077	4.5292	4.41752	4.59932	4.37226	3.98459		0.777289	0.0984889		0.135993	0.111681		-0.0452594	-0.614728
YBR288C	APM3	3.28688	3.51979	3.59216	3.51979	3.32048	3.22497	2.78869	2.86987		0.830096	0.0986229		0.305277	0		-0.531799	-0.355095
YKR050W	TRK2	4.60999	4.24565	4.17871	4.3505	4.04527	4.0781	4.39506	4.33485		0.409652	0.0988634		-0.431277	0.104849		0.349795	0.256757
YCR005C	CIT2	8.21902	8.30893	8.32724	8.42626	8.41337	8.37569	8.68933	8.58613		0.776551	0.0988634		0.108215	0.117334		0.27596	0.210436
YAR015W	ADE1	4.67356	4.74416	4.83036	4.69933	4.90304	4.70266	5.15015	5.18943		0.985853	0.0989193		0.1568	-0.0448316		0.247115	0.486772
YJL020C	BBC1	5.13381	4.95	5.33056	5.3302	4.86047	5.23304	4.74362	4.7939		0.0937347	0.0991031		0.196748	0.380198		-0.116844	-0.439149
YGR046W	TAM41	4.19771	3.9991	4.28392	4.27798	4.75114	4.72465	5.03826	5.11187		0.668508	0.0991031		0.0862136	0.278887		0.287118	0.387216
YKL209C	STE6	5.19101	5.19574	5.49793	5.59006	4.94579	4.74147	4.60229	4.54164		0.0128504	0.0997795		0.306922	0.394322		-0.343504	-0.199828
YDL117W	CYK3	3.36457	3.43962	3.37712	3.29131	3.36597	3.72465	3.12267	3.24793		0.741731	0.0997795		0.0125513	-0.148314		-0.2433	-0.476723
YDR343C	HXT6	11.9348	11.7771	11.8512	11.8359	11.3717	11.3252	11.1395	11.0766		0.818732	0.0997795		-0.083518	0.0588575		-0.232129	-0.248606
YFR054C	YFR054C	2.61353	2.44626	2.59694	2.61824	2.70266	1.96717	2.96901	3.32193		0.985853	0.10027		-0.0165965	0.171982		0.266355	1.35476
YHR058C	MED6	3.96255	4.17792	4.13093	4.01792	4.07211	4.49761	4.57833	4.8748		0.953469	0.100844		0.168382	-0.159996		0.506229	0.377185
YPR032W	SRO7	3.28688	3.04963	3.37712	3.42492	3.38819	3.20789	2.95047	2.9486		0.446173	0.100872		0.0902426	0.375291		-0.437721	-0.259292
YIL113W	SDP1	2.93923	2.32481	2.58736	2.20789	3.43563	3.55213	3.89821	4.1177		0.774861	0.100911		-0.351862	-0.116918		0.46258	0.565564
YHL023C	NPR3	2.45154	2.47249	2.92029	3.05658	2.93168	3.13914	2.85798	2.38681		0.00709267	0.101246		0.468752	0.584096		-0.0737021	-0.752331
YER154W	OXA1	5.80193	5.69377	5.77979	5.75542	4.96855	5.02503	4.78607	4.53232		0.970885	0.101358		-0.0221496	0.061656		-0.182478	-0.492712
YOR332W	VMA4	7.5601	7.79058	7.49378	7.36728	6.85162	7.51428	6.82629	6.86542		0.061502	0.101371		-0.0663281	-0.423293		-0.0253299	-0.648856
YOL077W-A	ATP19	7.37191	7.37851	7.90056	8.14313	6.6865	7.06663	6.57637	6.3906		2.41369e-05	0.10157		0.528658	0.764616		-0.11013	-0.676029
YDR381W	YRA1	7.43896	7.37669	7.54782	7.46279	7.09803	7.24982	6.95292	6.90785		0.83389	0.10178		0.108862	0.0860988		-0.145116	-0.341972
YBL007C	SLA1	5.30305	5.03958	5.08704	5.10476	5.20984	5.2765	5.01525	4.99186		0.616438	0.101896		-0.216012	0.0651789		-0.194595	-0.284635
YDR184C	ATC1	3.44758	3.52482	3.56925	3.30159	3.92979	4.68538	4.8535	4.80632		0.912927	0.101896		0.121669	-0.223228		0.923706	0.120945
YJR032W	CPR7	4.64731	4.87676	4.96809	4.63749	4.51223	4.9486	4.44493	4.27202		0.985853	0.101896		0.320776	-0.239268		-0.0672948	-0.676578
YBL023C	MCM2	3.9991	3.99639	4.07724	3.97728	3.93546	4.1127	3.80426	3.60288		0.985853	0.101896		0.078145	-0.0191088		-0.1312	-0.509816
YMR077C	VPS20	2.95047	3.10769	2.9982	3.20477	3.19377	3.73985	4.06867	3.97269		0.985853	0.101896		0.0477271	0.0970789		0.874899	0.232845
YHR132C	ECM14	5.25626	5.63604	5.39025	5.27165	5.04832	5.06005	5.38647	5.32373		0.54473	0.102545		0.133999	-0.364395		0.338143	0.263683
YKL187C	FAT3	5.38024	5.22458	4.93546	5.01614	3.97361	3.8339	4.34127	4.14568		0.00389894	0.103434		-0.444785	-0.208441		0.367663	0.311775
YLR099C	ICT1	7.99803	7.94597	7.90713	7.90087	8.63405	8.78829	8.93419	8.96486		0.576424	0.103434		-0.0908952	-0.0451037		0.300143	0.176566
YPR057W	BRR1	4.21023	3.63807	4.04701	3.91934	3.56925	3.80323	4.02237	4.19692		0.994121	0.10372		-0.163218	0.281266		0.45312	0.393695
YGR270W	YTA7	4.11936	4.09845	4.30524	4.15462	4.7021	5.0917	5.18943	5.20711		0.736981	0.10401		0.185885	0.0561624		0.487326	0.115412
YOR379C	YOR379C	0.505891	-1.25154	2.04614	1.25096	1.58015	0.831877	1.73985	2.9241		0.117809	0.104152		1.54025	2.5025		0.159703	2.09222
YCL040W	GLK1	9.57105	9.47972	9.25177	9.37328	9.3965	9.44884	9.14111	9.24781		0.0481619	0.104462		-0.319285	-0.106441		-0.255387	-0.20103
YBR154C	RPB5	4.62	4.99503	5.07596	4.47249	3.64731	4.81558	3.58376	3.71699		0.952626	0.104982		0.455961	-0.522544		-0.0635548	-1.09858
YPR022C	SDD4	3.89918	3.77821	4.08066	4.24413	3.91265	3.77294	3.57046	3.51475		0.0912223	0.10509		0.181482	0.465917		-0.342187	-0.258188
YDR085C	AFR1	2.73335	2.95977	3.18587	3.17313	3.27053	3.56316	3.69488	3.92505		0.353483	0.10509		0.452512	0.213357		0.424351	0.361892
YMR010W	YMR010W	5.52732	5.40667	5.55275	5.53356	5.58826	5.47411	5.84046	5.82043		0.921629	0.10509		0.0254253	0.126891		0.252198	0.346323
YOR034C	AKR2	6.54597	6.22168	6.41802	6.46548	7.28956	7.00326	7.49458	7.38647		0.985853	0.10509		-0.127947	0.243801		0.205018	0.383201
YPR108W-A	YPR108W-A	0.594549	1.75275	1.71809	0.604071	2.76765	3.30889	3.774	4.05398		0.985853	0.105404		1.12354	-1.14868		1.00634	0.745095
YFR026C	ULI1	3.57531	3.07382	3.74524	3.69711	3.8846	3.851	4.52293	4.38198		0.643925	0.1063		0.169925	0.623286		0.638337	0.530976
YKR023W	YKR023W	1.5509	1.38405	1.19535	1.40054	-0.136062	1.64155	2.12763	1.73552		0.802594	0.106318		-0.355553	0.0164881		2.26369	0.0939761
YKR026C	GCN3	3.88069	4.37782	4.38612	4.0798	3.7301	3.83693	3.32912	3.34483		0.958673	0.106352		0.505436	-0.298013		-0.400973	-0.492106
YDR325W	YCG1	3.42223	3.24336	3.15056	3.32048	2.89142	3.35614	2.66903	2.81558		0.643925	0.106759		-0.271673	0.0771203		-0.222392	-0.540568
YKR031C	SPO14	3.47119	3.34625	3.67356	3.51854	3.63227	3.82883	3.44626	3.46597		0.478296	0.106974		0.202369	0.172287		-0.186012	-0.36286
YGL106W	MLC1	6.57213	6.83517	6.98208	6.74698	6.41633	6.6659	6.3067	6.1375		0.705192	0.106974		0.409949	-0.0881817		-0.109633	-0.528401
YDR073W	SNF11	5.77215	5.59783	5.9404	5.88777	5.57743	5.47151	5.85723	5.91217		0.453465	0.107217		0.168252	0.28994		0.279806	0.440658
YAL023C	PMT2	7.62139	7.40795	7.34367	7.31442	8.39532	8.31628	8.05387	8.18775		0.130999	0.107436		-0.277718	-0.0935229		-0.341448	-0.128534
YHR154W	RTT107	2.88947	2.80941	2.83794	2.89724	2.36457	2.22959	1.54597	2.07039		0.976697	0.107436		-0.0515303	0.087826		-0.818604	-0.159199
YDR009W	GAL3	3.70929	3.774	3.46336	3.58496	3.65764	3.52105	3.15543	3.22651		0.299659	0.107982		-0.24593	-0.189034		-0.502215	-0.294542
YML011C	RAD33	4.07724	3.35191	3.76977	3.36317	3.97728	4.47962	4.78607	4.66107		0.821103	0.108476		-0.307471	0.0112601		0.808794	0.181447
YKL166C	TPK3	2.93923	3.12928	2.60644	2.50335	2.27798	3.05658	2.20163	1.85997		0.124244	0.109155		-0.332784	-0.625934		-0.0763509	-1.19661
YLR018C	POM34	4.96809	4.94392	5.0648	4.88947	5.36667	5.49953	5.82909	5.66021		0.985853	0.109777		0.0967059	-0.0544478		0.462417	0.160683
YLR457C	NBP1	2.23266	2.25701	2.47249	2.33628	1.79494	2.02857	2.64155	2.46728		0.897562	0.109976		0.239827	0.0792728		0.84661	0.43871
YBL069W	AST1	3.12598	3.1177	3.15543	3.07039	2.72901	3.16993	2.3978	2.488		0.952658	0.109976		0.0294438	-0.0473057		-0.331206	-0.681924
YAL019W	FUN30	3.854	3.70266	4.01167	3.89239	4.09424	4.27873	3.94953	3.86196		0.552505	0.110219		0.157679	0.189733		-0.144701	-0.416773
YOR295W	UAF30	2.90689	2.26303	3.16511	2.55582	2.45681	2.51349	3.12433	3.07553		0.783911	0.110601		0.258217	0.292782		0.667522	0.562042
YGR237C	YGR237C	3.29719	3.28392	3.39506	3.43696	3.77083	4.08831	4.29572	4.23419		0.83389	0.110627		0.0978714	0.15304		0.524894	0.145883
YBR140C	IRA1	5.57198	5.33557	5.59783	5.6642	5.5157	5.28614	5.17632	5.14241		0.53294	0.110671		0.025849	0.328629		-0.339377	-0.143728
YJL185C	ATG36	4.03826	4.10852	4.0045	4.47119	4.26604	3.53978	4.55459	4.39025		0.808556	0.110755		-0.0337592	0.362663		0.288552	0.850476
YJL111W	CCT7	4.849	4.97407	4.84499	4.8505	4.80684	4.56255	4.28466	4.43296		0.671827	0.110941		-0.00401027	-0.123571		-0.522177	-0.129588
YOR047C	STD1	2.59216	2.58976	2.76977	2.81147	3.35191	3.67469	3.91073	3.93546		0.790284	0.111537		0.177614	0.221708		0.558822	0.260773
YDL200C	MGT1	4.22805	4.30305	4.49121	4.49313	4.26153	4.70432	3.9991	4.04002		0.665779	0.111552		0.263163	0.190085		-0.262433	-0.664303
YDL173W	PAR32	4.04439	4.04352	4.26679	4.14241	4.33985	4.88509	5.06824	5.00225		0.765328	0.111855		0.222392	0.0988939		0.728391	0.117166
YLR451W	LEU3	3.87184	3.43829	3.7301	3.80426	3.51728	3.60644	3.30159	3.16027		0.903228	0.111855		-0.141747	0.365967		-0.215688	-0.446167
YLR154C	RNH203	4.47508	4.73985	4.75114	4.54226	3.80116	4.47184	3.35191	3.59335		0.992559	0.111855		0.276057	-0.19759		-0.449248	-0.878484
YNL331C	AAD14	3.0197	2.97636	2.44626	2.74846	2.56071	2.76553	3.02857	3.3147		0.271084	0.111961		-0.573446	-0.227902		0.467854	0.549162
YLR176C	RFX1	3.18745	2.9982	3.55336	3.23573	2.94486	2.73118	2.20477	2.57773		0.311344	0.112292		0.365909	0.237532		-0.740092	-0.153452
YDL034W	YDL034W	0.823749	1.24489	-0.37707	0.422233	0.678072	0.731183	2.53605	1.15056		0.53294	0.1132		-1.20082	-0.822654		1.85798	0.419376
YLR305C	STT4	5.77952	5.58165	5.84298	5.91862	5.59753	5.25776	5.21023	5.10434		0.417938	0.113211		0.0634564	0.336972		-0.387298	-0.153428
YLR028C	ADE16	6.72479	6.66534	6.61809	6.5935	7.11551	6.9005	7.27258	7.27966		0.482383	0.113605		-0.106695	-0.0718327		0.157071	0.379152
YPL172C	COX10	5.72055	5.71973	5.94813	5.94673	5.13709	5.19771	4.93263	4.83188		0.246621	0.113945		0.227581	0.227		-0.204465	-0.365831
YOR236W	DFR1	4.30305	4.43696	3.98732	4.32769	3.97636	4.47832	4.68426	4.70266		0.52779	0.114186		-0.315729	-0.109274		0.707894	0.224333
YOR130C	ORT1	3.22342	3.6893	3.65421	3.31179	3.59096	3.60644	3.05137	3.19377		0.985853	0.114186		0.430784	-0.377505		-0.539589	-0.41267
YJL126W	NIT2	3.47897	3.88362	3.36597	3.43962	3.78764	3.7939	4.2817	4.12102		0.395184	0.114372		-0.112999	-0.443998		0.494057	0.32712
YIL042C	PKP1	3.77821	4.02059	3.92029	3.8268	3.27352	2.85798	3.41414	3.73335		0.888184	0.114372		0.142085	-0.193788		0.14062	0.875373
YOL030W	GAS5	6.55351	6.39472	6.67228	6.71877	6.91779	6.79181	7.0635	7.16229		0.29174	0.114698		0.11877	0.324053		0.145713	0.370477
YNL208W	YNL208W	8.01625	8.09866	8.10873	7.93929	9.49159	9.42719	9.69103	9.69523		0.790944	0.114956		0.0924824	-0.159378		0.199436	0.268041
YDL138W	RGT2	4.0321	3.69599	4.1177	4.05745	3.89433	4.16672	4.44361	4.27053		0.496887	0.115264		0.0855942	0.361456		0.549274	0.103813
YLR281C	YLR281C	1.91839	1.75275	1.95977	1.926	2.55827	2.75916	1.27501	2.16027		0.985853	0.115264		0.0413839	0.173251		-1.28326	-0.598881
YNR034W-A	EGO4	5.24565	5.16027	5.14486	4.98048	2.87381	3.72247	4.12516	4.02148		0.730864	0.116431		-0.100786	-0.179792		1.25134	0.299014
YDL063C	SYO1	3.89336	4.16591	4.10601	4.24184	4.01078	3.88069	3.58376	3.63575		0.820813	0.1167		0.212651	0.0759282		-0.42702	-0.244931
YML110C	COQ5	5.07852	5.26454	5.43095	5.24982	4.63169	4.90689	4.41143	4.53792		0.588438	0.116909		0.35243	-0.0147119		-0.22026	-0.368973
GTK30J00270	GTK30J00270	5.95768	5.92148	5.6279	5.62556	6.23993	6.18567	6.43379	6.51869		0.00306691	0.116913		-0.329784	-0.295921		0.193861	0.333024
YML079W	YML079W	4.5472	4.70321	4.9855	5.03606	4.46074	4.82629	4.20477	4.23573		0.165252	0.116913		0.438297	0.332852		-0.255976	-0.590567
YOL117W	RRI2	2.56071	2.51096	2.25399	2.68257	2.73552	2.62059	2.20163	2.26604		0.888184	0.11767		-0.306726	0.171611		-0.533888	-0.35455
YPL014W	CIP1	3.70708	3.86096	3.77505	3.774	3.99548	3.67356	3.30597	3.50716		0.921629	0.118013		0.0679675	-0.0869665		-0.689514	-0.166396
YGR292W	MAL12	3.14078	2.92979	2.97085	3.13258	3.31034	3.18903	3.57168	3.69933		0.984623	0.118049		-0.169925	0.202786		0.261337	0.510296
YMR125W	STO1	5.77716	5.81737	5.78136	5.77847	5.28688	5.19928	5.04439	4.93216		0.83389	0.118053		0.00420305	-0.038896		-0.242487	-0.267124
YOR238W	YOR238W	4.58496	4.39849	4.54535	4.62293	4.1152	4.41481	4.73498	4.58376		0.921629	0.118143		-0.0396119	0.224443		0.619781	0.168948
YHR004C	NEM1	6.5489	6.34961	6.40497	6.4614	6.15543	6.24413	5.98891	5.92029		0.847968	0.11815		-0.143928	0.111785		-0.166514	-0.323833
YML129C	COX14	5.82477	5.80555	5.66249	5.57924	5.22689	5.6311	4.92647	4.91648		0.558908	0.118491		-0.162277	-0.22631		-0.30042	-0.714628
YDL056W	MBP1	3.67807	3.63807	3.86394	3.98459	3.71149	3.86691	3.52607	3.41549		0.287283	0.118582		0.185867	0.346516		-0.185426	-0.45142
YOR228C	MCP1	3.99458	3.65878	3.91743	3.48543	3.96717	3.8679	4.36877	4.26903		0.804271	0.118585		-0.077148	-0.173356		0.4016	0.401137
YGR036C	CAX4	5.72137	5.29536	5.56955	5.47444	5.99684	5.78921	6.25248	6.16832		0.961701	0.118585		-0.151821	0.17908		0.255636	0.379114
YLR045C	STU2	2.87971	2.96347	2.9982	3.08576	2.56803	3.12267	2.46467	2.39232		0.873047	0.118859		0.11849	0.12229		-0.103364	-0.730355
YNL043C	YNL043C	2.46467	3.00899	-1.18442	0.594549	2.31325	2.08066	3.01257	3.17313		0.000173786	0.119632		-3.64909	-2.41444		0.699323	1.09247
YMR158W	MRPS8	5.9279	5.84925	6.0993	6.04374	5.20477	5.6792	5.18309	4.851		0.589582	0.119632		0.171399	0.194489		-0.0216773	-0.828199
YOL027C	MDM38	5.05268	4.9814	5.08108	5.02148	4.98868	5.18706	4.76924	4.851		0.985853	0.119858		0.0284072	0.0400837		-0.219442	-0.336056
YOR235W	IRC13	4.84699	4.72955	5.46467	5.52513	5.18903	4.87036	5.44857	5.53294		0.00370172	0.119936		0.617674	0.795576		0.259537	0.662576
YOR344C	TYE7	6.82502	6.77624	6.70224	6.69905	6.3799	6.57546	6.27854	6.1469		0.437191	0.119936		-0.12278	-0.0771838		-0.101356	-0.428564
YNL267W	PIK1	4.55643	4.54288	4.5472	4.76924	4.59694	4.69042	4.42291	4.35755		0.831284	0.119936		-0.00922639	0.226366		-0.174029	-0.332865
YLR025W	SNF7	3.81044	3.73335	3.9542	3.8166	3.26754	2.73769	3.54226	3.66448		0.905844	0.120181		0.143753	0.0832454		0.274722	0.926796
YOR195W	SLK19	2.488	2.12433	2.852	2.5435	1.91073	2.25399	2.72901	2.36457		0.263703	0.120412		0.363998	0.419168		0.818276	0.110583
YMR186W	HSC82	8.22067	8.14277	8.14715	8.2008	8.93269	9.31447	9.39883	9.41407		0.864086	0.120495		-0.0735145	0.0580297		0.466142	0.0996021
YOR043W	WHI2	5.03694	4.82731	4.926	4.95838	4.63343	4.41007	4.21878	4.16511		0.950031	0.120619		-0.110943	0.131068		-0.41465	-0.244962
YJR135W-A	TIM8	7.46614	7.23965	7.69718	7.82769	7.29572	7.11103	6.80258	6.95733		0.0189146	0.120723		0.231038	0.588046		-0.493142	-0.153697
YOL107W	YOL107W	5.34589	4.99729	5.12928	5.2724	5.9644	6.01413	6.25096	6.26472		0.985853	0.120723		-0.21661	0.275104		0.286563	0.250592
YLR373C	VID22	3.33771	3.34056	3.52356	3.24793	3.67356	3.78346	4.04527	4.0197		0.985853	0.120912		0.185851	-0.0926348		0.371712	0.236245
YML007C-A	YML007C-A	1.53605	1.37295	0.333424	0.545968	0.389567	0.443607	2.13093	2.85599		0.748744	0.121918		-1.20263	-0.826984		1.74136	2.41238
YHR029C	YHI9	2.75061	3.37573	3.49057	3.0072	3.03386	3.37712	2.75916	2.58496		0.888428	0.122142		0.739964	-0.368539		-0.274708	-0.792161
YGL133W	ITC1	2.29866	2.27501	2.27501	2.17632	2.37851	2.54597	2.8339	2.79701		0.809955	0.122188		-0.0236513	-0.0986843		0.45539	0.251045
YDR417C	YDR417C	6.42811	6.82566	5.01748	4.46989	4.70708	4.58015	4.32337	3.91934		6.8319e-22	0.122276		-1.41063	-2.35577		-0.383713	-0.660805
YML096W	YML096W	4.0018	4.07296	3.89918	4.15623	3.7366	3.8125	3.42895	3.40599		0.91784	0.122476		-0.102627	0.0832715		-0.307659	-0.406506
YDL220C	CDC13	3.0321	3.22651	2.95047	3.33342	3.46336	3.54597	3.849	3.79181		0.976694	0.123352		-0.0816324	0.106915		0.385638	0.245846
YKL142W	MRP8	5.0197	5.15623	5.05875	5.04745	5.16269	5.34589	5.78005	5.43863		0.849409	0.123645		0.0390475	-0.108784		0.617354	0.0927325
YHR115C	DMA1	5.94603	5.92955	6.0398	5.99095	6.14751	6.14343	6.36894	6.43829		0.908619	0.124197		0.0937674	0.0614005		0.221433	0.294859
YLR432W	IMD3	7.53169	7.60266	6.74093	6.71987	6.824	6.88264	6.63967	6.62673		3.22572e-20	0.125234		-0.790766	-0.882794		-0.184338	-0.255912
Q0160	SCEI	3.56316	4.17313	4.45746	4.22651	2.9982	3.22805	2.51602	2.56316		0.300693	0.125234		0.894305	0.0533811		-0.48218	-0.664891
YOR059C	LPL1	3.51349	3.774	3.46989	3.29278	3.80116	3.74201	4.14649	4.12681		0.308013	0.125234		-0.0436048	-0.481215		0.345334	0.384801
YBR180W	DTR1	-1.8365	-0.785875	-2.05889	-2.39593	-2.55639	-1.94342	-0.810966	-0.621488		0.53294	0.125234		-0.222392	-1.61005		1.74543	1.32193
YJL067W	YJL067W	0.871844	0.298658	0.263034	-1.12029	0.722466	-1.21759	1.69153	1.45943		0.708211	0.125234		-0.608809	-1.41895		0.969068	2.67702
YBR232C	YBR232C	0.422233	0.669027	0.641546	-1.152	-1.32193	0.748461	1.65535	1.42223		0.8374	0.125234		0.219313	-1.82103		2.97728	0.673772
YGR281W	YOR1	6.28836	6.23554	6.26772	6.25172	6.16068	6.04177	5.87307	5.88899		0.888184	0.125234		-0.0206355	0.0161835		-0.287603	-0.152782
YNL095C	YNL095C	3.27501	2.88166	3.33628	3.44493	3.64155	3.63575	3.9486	4.0009		0.398077	0.125544		0.0612763	0.563267		0.307055	0.365147
YDR515W	SLF1	3.14731	2.94298	3.02326	3.22959	2.51602	3.03386	2.30451	2.22342		0.970473	0.125544		-0.124051	0.286604		-0.211504	-0.810441
YKR010C	TOF2	2.70708	2.75489	2.81147	2.94111	2.25096	2.48543	2.06695	1.73552		0.835813	0.125624		0.104388	0.186219		-0.184011	-0.749905
YGR212W	SLI1	3.04264	3.16672	2.78031	2.68482	2.65306	2.42223	2.12763	1.87184		0.18609	0.125642		-0.262334	-0.481897		-0.525427	-0.550389
YGR064W	YGR064W	2.50335	2.22342	1.41143	2.26903	3.29719	2.0321	3.85599	3.44626		0.629789	0.125816		-1.09192	0.0456106		0.558798	1.41416
YPL238C	YPL238C	3.30889	4.23036	1.84398	1.89918	1.74416	1.43829	2.90111	2.18269		0.000145217	0.126003		-1.4649	-2.33118		1.15695	0.744399
YNR022C	MRPL50	5.60496	5.24527	5.80012	5.79233	4.59515	5.38024	4.50779	4.49761		0.180543	0.126003		0.195162	0.547067		-0.0873509	-0.882632
YNL025C	SSN8	3.28836	2.63227	3.52732	3.65992	3.50335	3.55949	4.10098	3.81352		0.117085	0.126341		0.238962	1.02766		0.597629	0.254033
YDR301W	CFT1	3.74739	3.72792	3.84599	3.83289	3.73444	3.72028	3.40735	3.49697		0.839641	0.126654		0.0986044	0.10497		-0.327086	-0.223305
YNL052W	COX5A	5.38578	5.78921	6.14914	6.17852	4.88313	4.82782	4.41819	4.45483		0.00598983	0.126873		0.763361	0.389308		-0.464942	-0.372985
YOR329W-A	YOR329W-A	1.61824	-0.556393	-0.577767	-0.37707	1.7866	0.526069	2.43296	2.7845		0.60673	0.127379		-2.19601	0.179324		0.646363	2.25844
YDR035W	ARO3	6.21607	6.15866	6.2149	6.06824	5.80813	5.90087	5.60703	5.58406		0.748517	0.127801		-0.00116487	-0.0904193		-0.201093	-0.316806
YLR209C	PNP1	5.77768	5.7126	5.79935	5.6314	6.13955	6.20535	6.47151	6.40139		0.841958	0.128547		0.0216637	-0.0812004		0.331961	0.196038
YGL248W	PDE1	3.42358	3.47508	3.22342	3.43029	3.98277	4.21801	4.42223	4.51665		0.72481	0.128754		-0.200156	-0.0447996		0.439468	0.298639
YDR453C	TSA2	5.31361	5.44989	5.22728	5.54751	5.93899	5.52136	5.30195	5.4353		0.958303	0.128772		-0.0863297	0.0976201		-0.637038	-0.0860697
YDR354W	TRP4	5.52074	5.66477	5.75995	5.74792	5.07168	5.13873	4.96209	4.55459		0.625301	0.129701		0.239218	0.0831572		-0.109591	-0.584144
YHR079C	IRE1	4.50716	4.51159	4.58616	4.56438	4.54535	4.58796	4.34056	4.29646		0.951583	0.129817		0.0790039	0.0527836		-0.204788	-0.291508
YOR252W	TMA16	4.80116	4.24641	4.71973	4.43763	3.43296	3.81147	4.1035	4.16752		0.985853	0.130034		-0.0814276	0.191219		0.670538	0.356047
YFR047C	BNA6	7.26585	7.24108	7.17852	7.16621	7.11551	6.97934	6.76633	6.8363		0.529638	0.130035		-0.087334	-0.0748642		-0.349182	-0.143037
YNL136W	EAF7	0.594549	0.748461	1.20163	0.333424	0.863938	0.613532	1.41143	1.59455		0.934001	0.130035		0.607085	-0.415037		0.547488	0.981017
YMR272C	SCS7	5.83996	5.9191	6.10413	5.85997	5.68958	5.98185	5.60437	5.52199		0.83389	0.130378		0.264167	-0.0591321		-0.0852108	-0.45986
YDL032W	YDL032W	-0.943416	0.879706	0.432959	0.632268	1.48027	0.536053	2.75489	1.62761		0.962819	0.131012		1.37638	-0.247438		1.27462	1.09155
YLR360W	VPS38	4.17393	4.07468	3.93452	3.99277	3.82477	4.49249	4.65935	4.54782		0.465224	0.13112		-0.23941	-0.0819083		0.834586	0.0553258
YIR014W	YIR014W	1.48027	1.20163	1.11103	0.189034	2.0635	2.58256	2.73118	2.95047		0.35385	0.131435		-0.369234	-1.0126		0.66768	0.367912
YDR286C	YDR286C	4.73335	3.94392	4.19219	4.07639	4.55704	4.50653	4.15623	3.853		0.707029	0.133037		-0.54116	0.132467		-0.400808	-0.653528
YPL096C-A	ERI1	5.47021	5.53761	5.02192	4.34341	4.91313	5.52042	5.77479	5.72329		0.0204317	0.133061		-0.448288	-1.1942		0.861658	0.202863
YEL031W	SPF1	8.42631	8.19987	8.26613	8.30478	8.6871	8.71672	8.48281	8.50375		0.789472	0.133061		-0.160176	0.104916		-0.204288	-0.21297
YOR119C	RIO1	3.19849	3.19692	3.41819	3.16993	2.95977	3.12267	2.7866	2.34483		0.912927	0.133061		0.219696	-0.0269967		-0.173174	-0.777844
YLR187W	SKG3	4.09001	3.8846	4.19219	4.26303	4.56864	4.67807	4.92742	4.83542		0.318659	0.133389		0.102188	0.378436		0.358782	0.157347
YFL013C	IES1	1.8953	2.55336	2.76765	2.44361	2.24489	2.57289	2.91648	2.76765		0.535674	0.133645		0.872352	-0.109754		0.67159	0.194765
YDL193W	NUS1	4.83491	4.96209	4.79857	4.84097	5.12309	5.56041	5.65907	5.68958		0.662974	0.134007		-0.0363444	-0.12112		0.535982	0.129169
YOR039W	CKB2	5.29866	5.03914	5.06781	5.0387	4.67638	4.68986	4.38128	4.26679		0.60673	0.134069		-0.230848	-0.000438843		-0.295097	-0.423072
YGL055W	OLE1	10.4287	10.333	10.4284	10.4997	10.351	10.7834	10.3171	10.3071		0.875931	0.134575		-0.000303583	0.166654		-0.0339763	-0.476285
YBR002C	RER2	5.21023	5.37539	5.27538	4.97039	5.08874	5.26791	4.88411	4.84599		0.443754	0.135042		0.0651466	-0.404993		-0.204626	-0.421919
YKL154W	SRP102	4.20163	4.22882	4.30961	4.3067	4.10182	4.49633	4.12102	3.42223		0.936215	0.135042		0.107979	0.077881		0.0191973	-1.0741
YML101C-A	YML101C-A	1.60407	0.432959	0.815575	1.34483	1.45418	2.09424	2.8339	2.71589		0.985853	0.135042		-0.788496	0.911869		1.37973	0.621657
YBL107C	MIX23	4.93121	4.98048	4.94579	4.60526	4.20242	4.21956	3.6241	3.87676		0.549858	0.135055		0.0145847	-0.375225		-0.578317	-0.342793
YDL086C-A	YDL086C-A	2.02503	2.10098	1.68706	1.15704	2.87578	2.55827	3.32912	3.47119		0.535674	0.135221		-0.337968	-0.943934		0.453344	0.91292
YGR252W	GCN5	3.59335	3.68145	3.60999	3.59932	3.36877	3.70266	3.79286	4.09255		0.884895	0.135305		0.0166375	-0.0821315		0.424087	0.389888
YHR187W	IKI1	3.49185	3.77926	3.43962	3.49825	3.50843	3.37573	3.904	3.84298		0.618641	0.13602		-0.05223	-0.281009		0.395574	0.467244
YIL089W	YIL089W	0.765535	0.782409	0.748461	0.321928	1.75275	1.28688	2.22342	2.0635		0.8374	0.136673		-0.0170735	-0.46048		0.470674	0.776622
YMR001C-A	YMR001C-A	3.80116	3.22033	3.08576	3.39232	3.23573	3.08576	2.07382	2.28392		0.758657	0.136676		-0.715394	0.171987		-1.16191	-0.801843
YDR148C	KGD2	5.78869	5.84122	6.17951	6.13463	5.04571	5.17313	4.8268	4.84649		0.0151153	0.136678		0.390825	0.293413		-0.218902	-0.326634
YGR233C	PHO81	3.88069	3.76765	4.06867	4.09424	3.84197	3.89821	3.61589	3.59455		0.20798	0.13745		0.187985	0.326581		-0.226086	-0.30366
YFR052W	RPN12	6.58782	6.1807	6.42811	6.62585	6.61353	6.54828	6.37886	6.28133		0.803478	0.137666		-0.159706	0.44515		-0.234673	-0.266955
YDR377W	ATP17	8.38163	8.37326	8.58913	8.68303	7.67779	7.78333	7.44807	7.50231		0.135427	0.137901		0.207497	0.309773		-0.229715	-0.281011
YBR003W	COQ1	5.49346	5.55244	5.47379	5.61117	5.74281	5.68173	5.4353	5.48478		0.964811	0.138179		-0.0196683	0.0587338		-0.307519	-0.196948
YHR155W	LAM1	4.31542	4.08151	4.37504	4.51665	4.30378	4.30159	4.07211	4.0321		0.289505	0.138406		0.0596181	0.435135		-0.231675	-0.269487
YDL008W	APC11	4.50016	4.72846	4.70984	4.62469	4.30743	4.18349	4.56864	4.81198		0.991076	0.138741		0.209677	-0.103779		0.261212	0.628498
YJL122W	ALB1	5.33056	5.3302	5.34341	4.84699	4.47573	4.8505	4.36107	4.09255		0.45706	0.139371		0.0128494	-0.483205		-0.114667	-0.757954
YMR112C	MED11	5.31615	5.0751	5.11603	4.61412	4.70044	5.27947	4.59216	4.48156		0.357	0.139896		-0.200114	-0.460984		-0.108282	-0.797914
YNL079C	TPM1	6.67934	6.73715	6.82362	6.82222	5.87036	6.60763	6.01123	5.70791		0.791089	0.140975		0.144283	0.0850744		0.140863	-0.899715
YMR132C	JLP2	3.49825	3.36457	3.81558	3.33056	3.3147	3.851	4.15543	4.0365		0.874741	0.140975		0.317325	-0.034014		0.840729	0.185504
YNL234W	YNL234W	1.91456	1.92979	2.13093	1.96717	2.85798	3.14241	3.42492	3.43296		0.928791	0.140975		0.216366	0.0373776		0.566941	0.290546
YOR251C	TUM1	5.01659	5.39369	5.22381	5.21335	4.40871	4.84197	4.29572	4.21956		0.93417	0.141027		0.207223	-0.180343		-0.112989	-0.622417
YOL110W	SHR5	4.0798	4.19298	4.1102	4.36457	4.1102	4.07895	4.30232	4.71973		0.93989	0.141208		0.0303914	0.171589		0.192123	0.64078
YPL108W	YPL108W	1.34483	2.57046	2.89918	2.52105	1.19535	1.95233	2.67582	2.25096		0.499862	0.141272		1.55435	-0.0494122		1.48047	0.298628
YER092W	IES5	5.01614	5.55704	5.46303	5.51602	5.58376	5.95977	6.2363	6.05246		0.82374	0.141284		0.446894	-0.0410273		0.652542	0.0926892
YDR113C	PDS1	3.26454	3.42492	3.39094	3.11103	2.40599	3.14893	2.01436	2.36737		0.832639	0.141314		0.126406	-0.313891		-0.391637	-0.781563
YMR281W	GPI12	3.83289	3.97177	4.02059	3.99095	3.85	3.68482	4.30889	4.04614		0.921629	0.141919		0.187701	0.0191814		0.458886	0.361323
[truncated: 4,339 more rows]

## Sheet: 5-2) Significant Genes
Table S5-2) Genes showing a significant (FDR < 0.05) change when AZF1 is over-expressed and a corresponding change in expression in Y128 compared to Y22-3 in xylose -O2
Column Descriptions:
Column 1	Systematic name for each yeast gene
Column 2	Standard name for each yeast gene, from the Saccharomyces Genome Database (http://www.yeastgenome.org)
Columns 3-4	Log2 ratios of RNA-seq read counts comparing Y133 AZF1 MoBY 2.0 plasmid (OE) and Y133 MoBY 2.0 control plasmid in xylose -O2.
Columns 5-6	Log2 ratios of RNA-seq read counts comparing Y128 and Y22-3 in xylose -O2.
1	2	3	4	5	6
Systematic Name	Gene Name	MoBY AZF1 / MoBY Control Xylose Anaerobic A RNAseq	MoBY AZF1 / MoBY Control Xylose Anaerobic B RNAseq	Y128 / Y22-3 Xylose Anaerobic A RNAseq	Y128 / Y22-3 Xylose Anaerobic B RNAseq
YBR301W	PAU24	0.33	0.49	7.70393	7.60237
YLL025W	PAU17	0.5	0.57	7.04544	7.98423
YNR075W	COS10	0.19	0.66	7.14472	7.86359
YMR317W	YMR317W	0.29	0.56	6.64178	7.20209
YLR037C	PAU23	0.28	0.53	4.78118	6.26105
GTK30F00260	GTK30F00260	1.17	1.3	4.92593	6.08694
YBR238C	YBR238C	0.24	0.41	5.06165	5.10425
YLR054C	OSW2	0.99	0.95	4.17969	5.88919
GTK30H00100	GTK30H00100	0.57	0.83	5.02711	4.93283
GTK30L00130	GTK30L00130	0.47	0.6	4.32703	5.0581
YOR337W	TEA1	0.33	0.7	4.26031	5.12173
YER052C	HOM3	0.16	0.52	4.62938	4.67292
YJL198W	PHO90	0.41	0.42	4.34322	4.79419
YHR163W	SOL3	0.66	0.5	4.50596	4.56181
YIR031C	DAL7	0.51	0.84	3.91976	5.09059
YBR021W	FUR4	0.84	1	4.51872	4.42266
YGR224W	AZR1	0.78	1.2	4.24539	4.5067
YHR092C	HXT4	0.76	1.03	3.85138	4.69609
YPL170W	DAP1	0.16	1.23	3.91261	4.48988
YBL094C	YBL094C	1.11	1.9	4.03285	4.29322
YGR284C	ERV29	0.78	1.06	3.73225	4.53243
YHR065C	RRP3	1.05	0.47	3.63602	4.61315
YNL044W	YIP3	0.75	0.93	3.71845	4.34908
YGL067W	NPY1	1.05	0.93	3.94009	4.1174
YJR105W	ADO1	0.39	0.61	4.04165	3.96054
YAR020C	PAU7	0.47	0.68	3.29437	4.65468
YGL077C	HNM1	0.27	0.48	4.08028	3.82802
YIL013C	PDR11	0.33	0.44	3.88936	4.01262
YOR008C-A	YOR008C-A	3.17	1.09	3.54742	4.29322
YBL042C	FUI1	0.74	0.65	3.80781	3.99595
YDR210W	YDR210W	0.97	0.71	3.61087	4.09922
YIL114C	POR2	0.43	0.69	3.51895	4.17168
YLR313C	SPH1	0.76	0.58	3.33479	4.3314
YGR210C	YGR210C	0.92	0.98	3.52752	3.9962
YGR146C	ECL1	0.52	0.52	3.19014	4.2313
YEL046C	GLY1	0.71	0.69	3.3368	4.07152
YBL039C	URA7	0.45	0.42	3.62013	3.64418
YPL239W	YAR1	1.22	0.75	3.4665	3.78101
YML056C	IMD4	0.51	0.51	3.69102	3.51759
YGL209W	MIG2	0.64	0.27	3.4335	3.76588
YBR056W-A	YBR056W-A	1.33	1.67	3.19233	3.9588
YDR123C	INO2	0.7	0.36	3.62035	3.43258
YBL096C	YBL096C	0.79	1.34	3.78349	3.26812
YOL052C	SPE2	0.46	0.47	3.3775	3.60792
YOR079C	ATX2	0.79	0.54	3.48183	3.48508
YPR175W	DPB2	0.97	0.73	3.46071	3.41251
YIR044C	YIR044C	0.62	1.28	3.39542	3.43952
YLR121C	YPS3	0.99	0.95	3.1937	3.62658
YCR045W-A	YCR045W-A	0.47	0.87	2.8676	3.93349
YOL076W	MDM20	0.59	0.19	3.3315	3.45489
YLL035W	GRC3	0.61	0.4	3.34097	3.44258
YJL058C	BIT61	0.4	0.67	3.37234	3.40486
YGL223C	COG1	0.49	0.57	3.12031	3.62919
YML018C	YML018C	0.31	0.6	3.29339	3.44563
YPR174C	YPR174C	0.93	1	3.42563	3.28869
GTK30I00260	GTK30I00260	0.83	1.5	3.25059	3.45316
YPL106C	SSE1	0.65	0.37	3.25304	3.44612
YKL009W	MRT4	0.81	0.61	3.30922	3.31944
YKL074C	MUD2	1.04	0.54	3.36216	3.25359
YHR049W	FSH1	0.61	0.64	3.31972	3.19802
YKL068W-A	YKL068W-A	0.47	0.93	2.50365	3.98543
YDL037C	BSC1	0.49	0.51	3.10977	3.34681
YHR067W	HTD2	1.09	1.11	2.85776	3.56209
YOR385W	YOR385W	1.5	1.03	2.91807	3.47963
YOR269W	PAC1	0.79	0.55	3.215	3.16068
YGR294W	PAU12	2.13	1.19	3.09119	3.27654
YLR346C	CIS1	1.22	0.39	2.6592	3.69462
YKR056W	TRM2	0.53	0.32	3.00489	3.34394
YBL057C	PTH2	0.77	0.2	3.01691	3.29632
YDR234W	LYS4	0.5	0.27	3.04562	3.24498
YDR161W	ACL4	0.61	0.47	2.79868	3.47391
YML015C	TAF11	0.66	0.62	2.81046	3.45589
YLR317W	YLR317W	0.36	0.82	2.87616	3.37831
YNL313C	EMW1	0.62	0.26	3.0168	3.21196
YOR103C	OST2	0.77	0.67	3.0389	3.13567
YIL110W	HPM1	0.58	0.76	2.89657	3.27106
YER158C	YER158C	0.39	0.36	2.82127	3.34265
YLR315W	NKP2	0.47	0.66	3.18243	2.94886
YDL015C	TSC13	0.36	0.71	2.95591	3.15875
YFL001W	DEG1	0.82	0.36	2.99175	3.09503
YBL055C	YBL055C	0.56	0.66	2.69032	3.39606
YKR030W	GMH1	0.26	0.55	2.88371	3.19935
YNL130C	CPT1	0.81	0.81	2.97358	3.08778
YGL012W	ERG4	0.49	0.47	2.88286	3.09876
YKL174C	TPO5	0.74	1	2.60637	3.37523
YIL049W	DFG10	0.79	0.75	2.56391	3.41099
YAL040C	CLN3	0.55	0.57	2.89091	2.96209
YDR448W	ADA2	1.18	0.79	2.59353	3.22965
YOR176W	HEM15	0.54	0.43	2.75206	3.05872
YDR323C	PEP7	0.93	0.56	2.53425	3.25836
YDR410C	STE14	0.29	0.6	2.7027	3.08913
YGR213C	RTA1	0.88	1.08	2.3974	3.38105
YDR055W	PST1	0.77	0.94	2.62722	3.14702
YDL039C	PRM7	0.49	0.79	2.82396	2.92721
YNL064C	YDJ1	0.46	0.24	2.89494	2.84759
YPL045W	VPS16	0.98	0.67	2.57322	3.16525
YLR237W	THI7	0.47	0.25	2.52397	3.1998
YER185W	PUG1	1.26	1.52	2.42189	3.28609
YOR153W	PDR5	0.67	0.74	2.69473	2.97517
YNL221C	POP1	0.58	0.41	2.41532	3.22429
YKR088C	TVP38	0.47	0.48	2.6382	2.9873
YGL234W	ADE5,7	0.53	0.39	2.81958	2.78936
YLR194C	NCW2	1.18	1.31	2.74692	2.81584
YBR250W	SPO23	1.57	0.95	1.79807	3.73291
YOR197W	MCA1	0.5	0.39	2.48853	3.0184
YIL121W	QDR2	0.47	0.42	2.51388	2.98881
YPL149W	ATG5	1.19	1.33	2.45744	3.04404
YFR055W	IRC7	0.88	0.82	2.54742	2.91636
YNR057C	BIO4	0.78	0.82	2.69943	2.7364
GTK30K00160	GTK30K00160	0.81	1.43	2.60747	2.82404
YBR060C	ORC2	0.89	0.37	2.47229	2.95566
YBR078W	ECM33	0.19	0.66	2.7716	2.65131
YMR211W	DML1	0.84	1.03	2.60736	2.78101
YHR124W	NDT80	1.2	0.97	1.87757	3.49413
YDR380W	ARO10	1.15	1.24	2.41522	2.91383
YLR063W	BMT6	0.69	0.46	2.81046	2.47476
YIR028W	DAL4	0.73	0.66	2.56253	2.72064
YNL142W	MEP2	1.34	1.44	2.62846	2.64955
YLR414C	PUN1	1.19	1.09	2.30519	2.9588
YGL060W	YBP2	0.6	0.55	2.32125	2.93378
YML108W	YML108W	0.7	0.73	2.51785	2.7364
GTK30K00170	GTK30K00170	0.89	0.6	2.49614	2.70825
YGR216C	GPI1	0.34	0.62	2.48612	2.69496
YGL257C	MNT2	0.3	0.72	2.53232	2.61108
YMR316C-A	YMR316C-A	0.9	1.99	3.16409	1.93773
YHR133C	NSG1	0.69	0.73	2.29728	2.79669
YOL097W-A	YOL097W-A	1.03	2.09	2.72799	2.34212
YGR077C	PEX8	0.93	1.08	2.2591	2.74548
YGL178W	MPT5	0.63	0.66	2.27899	2.7248
YCL050C	APA1	0.57	0.51	2.32338	2.67333
YPR159W	KRE6	0.66	0.77	2.42855	2.54536
YBL054W	TOD6	0.55	0.71	2.5927	2.36849
YER130C	COM2	0.61	0.59	2.20655	2.75326
YGR211W	ZPR1	1.33	0.91	2.26845	2.6862
GTK30L00200	GTK30L00200	0.92	0.99	2.40303	2.54611
YPR125W	YLH47	1.26	0.53	2.37524	2.55816
GTK30F00250	GTK30F00250	0.5	0.74	2.15725	2.76046
YPL001W	HAT1	1.01	1.21	2.13015	2.76762
YGL225W	VRG4	0.46	0.92	2.4608	2.42883
YGR204W	ADE3	0.31	0.29	2.27668	2.59883
YJR011C	YJR011C	0.94	0.74	2.26502	2.60057
YNL020C	ARK1	0.83	0.65	2.2188	2.64274
YLL024C	SSA2	0.4	0.5	2.42816	2.36111
YDR308C	SRB7	1.07	0.6	1.89927	2.87167
YEL036C	ANP1	0.69	0.44	2.12503	2.63976
YGL070C	RPB9	0.77	0.92	2.3186	2.43915
YDR246W-A	YDR246W-A	1.69	1.98	1.86292	2.89467
YDL241W	YDL241W	1.45	1.05	2.59989	2.13567
YHR048W	YHK8	0.37	0.59	2.32558	2.40875
YGR189C	CRH1	0.68	0.51	2.31133	2.41803
YNR013C	PHO91	0.39	0.55	2.12025	2.5807
YBR004C	GPI18	1.01	1.1	2.13201	2.545
YMR315W-A	YMR315W-A	1.17	0.8	2.09996	2.56452
GTK30H02780	GTK30H02780	0.93	1.62	1.96246	2.68762
YLR120C	YPS1	1.11	1.14	1.78885	2.85003
YJL159W	HSP150	0.72	0.84	2.02211	2.57419
YGR138C	TPO2	1.14	1.42	2.32091	2.26425
YPL076W	GPI2	0.35	0.58	2.07623	2.49967
YGR161C	RTS3	0.39	0.23	1.96668	2.5922
YFL056C	YFL056C	1.01	0.99	1.6308	2.90894
GTK30A00970	GTK30A00970	0.68	1.37	2.30173	2.22129
YLR006C	SSK1	0.68	0.52	2.07827	2.44372
YFL057C	YFL057C	1.08	0.81	1.66062	2.85597
YMR312W	ELP6	0.38	0.55	1.77733	2.724
YPL067C	YPL067C	0.59	0.46	2.00128	2.47812
YOR112W	CEX1	2.81	2.69	2.07117	2.36782
YMR305C	SCW10	0.93	0.91	2.23142	2.20462
YMR122W-A	YMR122W-A	0.63	1.05	2.05699	2.3041
YNL003C	PET8	0.6	0.69	1.80923	2.51703
GTK30L00180	GTK30L00180	0.66	0.73	1.44384	2.85985
YDR223W	CRF1	1.14	1.43	1.77889	2.50874
YPL088W	YPL088W	0.53	0.43	1.96166	2.31378
YCL005W	LDB16	0.63	0.56	1.8234	2.44623
YDR461W	MFA1	0.93	0.51	2.0125	2.22665
YLR417W	VPS36	0.99	0.95	2.02018	2.21368
YBR023C	CHS3	0.32	0.52	2.02572	2.17378
YOL014W	YOL014W	1.34	1.31	1.8796	2.31275
YNL279W	PRM1	1.21	0.41	2.3186	1.86819
YNR018W	RCF2	0.55	0.55	1.87956	2.27685
YPL169C	MEX67	0.64	0.27	1.9279	2.217
YLR260W	LCB5	0.91	0.74	1.98733	2.1435
YJL034W	KAR2	0.32	0.32	1.98896	2.11075
YPR198W	SGE1	0.33	0.81	1.82325	2.25665
YLR390W-A	CCW14	0.52	0.98	1.89912	2.14966
YNL281W	HCH1	0.69	0.67	1.8766	2.15472
YBL089W	AVT5	0.44	0.74	1.86633	2.15363
YEL017C-A	PMP2	0.55	0.86	1.83541	2.18184
YPR181C	SEC23	0.52	0.68	1.93248	2.08374
YPL245W	YPL245W	0.53	0.88	1.85685	2.08485
GTK30O00150	GTK30O00150	0.69	1.18	1.58824	2.3184
YOR274W	MOD5	0.74	0.3	1.94561	1.94468
YFR039C	OSW7	0.34	0.45	1.66472	2.22275
YPL221W	FLC1	0.52	0.43	1.79988	2.08128
YKR020W	VPS51	0.68	0.72	1.65212	2.21764
YBR051W	YBR051W	1.73	2.4	1.22549	2.60516
YGL004C	RPN14	1.35	1.06	1.62846	2.0982
YGL069C	YGL069C	2	1.46	1.96246	1.75716
YMR316W	DIA1	1.29	1.07	1.70979	1.97759
YOR207C	RET1	0.39	0.32	1.8101	1.85882
YOR299W	BUD7	0.88	0.84	1.88669	1.75197
YER144C	UBP5	0.83	0.95	1.72647	1.89102
YBR293W	VBA2	0.88	0.91	1.59837	1.99287
YIL117C	PRM5	1.36	1.16	1.62748	1.95181
YHR151C	MTC6	0.66	0.47	1.62936	1.9473
YKL191W	DPH2	0.94	0.71	1.83654	1.71246
YMR265C	YMR265C	0.99	0.55	1.78939	1.75716
YJL171C	TOH1	1.25	1.26	1.56071	1.97431
YDL012C	YDL012C	1.31	1.03	1.93403	1.58981
YMR138W	CIN4	0.56	1.22	1.56653	1.9462
YPR173C	VPS4	0.54	0.54	1.57785	1.92709
YLR007W	NSE1	0.63	0.41	1.5907	1.9011
YBR008C	FLR1	0.79	0.89	1.70012	1.7513
YIL067C	YIL067C	0.52	0.55	1.6797	1.7488
YKR061W	KTR2	1.21	0.79	1.43344	1.98272
YNR059W	MNT4	0.75	0.62	1.51076	1.89199
YHR030C	SLT2	0.91	0.63	1.49789	1.90185
YLR415C	YLR415C	1.22	0.68	0.96246	2.43523
YNL282W	POP3	1.45	0.47	1.88339	1.51052
YJL065C	DLS1	1.06	0.49	1.55541	1.80804
GTK30B00160	GTK30B00160	0.71	0.89	1.59746	1.74009
YPL114W	YPL114W	0.74	0.91	1.54742	1.75716
YPR162C	ORC4	0.59	0.46	1.39344	1.90619
YCR028C	FEN2	0.53	0.99	1.6651	1.61497
YCR095C	OCA4	0.98	0.51	1.31074	1.96575
YNL114C	YNL114C	1.08	2.03	1.81046	1.43523
YLR180W	SAM1	0.9	0.53	1.59864	1.63702
YJR061W	YJR061W	0.55	0.43	1.47978	1.73751
YHR126C	ANS1	5.23	6.62	1.96246	1.24259
YBR133C	HSL7	0.37	0.35	1.72177	1.48326
YNL263C	YIF1	0.63	0.68	1.39772	1.74658
YGL072C	YGL072C	1.16	1.26	1.3775	1.75716
YJL139C	YUR1	0.7	0.74	1.38268	1.72265
GTK30J03680	GTK30J03680	0.49	0.64	1.56048	1.53711
YKL179C	COY1	0.79	0.61	1.29963	1.79676
YCL038C	ATG22	0.47	0.93	1.36082	1.69592
YGL199C	YGL199C	1.63	0.77	0.125958	2.89467
YPR016C	TIF6	0.23	0.37	1.4298	1.58763
GTK30D02750	GTK30D02750	0.85	0.61	1.41995	1.56928
YOR007C	SGT2	0.55	0.69	1.35833	1.6298
YAL020C	ATS1	0.64	0.92	1.10393	1.87062
YNL245C	CWC25	0.63	0.47	1.55126	1.41251
YNL326C	PFA3	0.21	0.75	1.43521	1.50963
YJL077W-A	YJL077W-A	0.62	0.61	1.39185	1.53477
YEL041W	YEF1	0.66	0.28	1.35307	1.57274
YNL192W	CHS1	0.98	1.05	1.32859	1.578
YKL177W	YKL177W	1.96	1.36	1.64053	1.24259
YER184C	TOG1	0.84	0.94	1.2968	1.58313
YLL012W	YEH1	0.75	0.41	1.21523	1.65205
YNR048W	YNR048W	0.62	0.58	1.10868	1.74955
YMR185W	RTP1	0.89	0.66	1.19788	1.64879
YGR031C-A	NAG1	1.91	1.32	1.05557	1.75716
YLR347C	KAP95	0.47	0.57	1.36809	1.42446
YOR360C	PDE2	0.65	0.81	1.3552	1.42199
YKR042W	UTH1	0.32	0.59	1.25458	1.48841
YMR015C	ERG5	0.99	0.54	1.22955	1.48931
YNL123W	NMA111	0.49	0.24	1.24821	1.46972
YOR104W	PIN2	0.96	0.53	1.15711	1.5321
YOL128C	YGK3	0.97	0.87	0.928108	1.72802
YPR196W	YPR196W	0.97	0.86	1.27144	1.34544
YDR071C	PAA1	0.61	0.31	1.15493	1.4232
YMR238W	DFG5	0.72	1	1.0208	1.51843
YHR142W	CHS7	0.6	0.94	1.24074	1.29137
YKL046C	DCW1	0.65	0.96	1.04619	1.47086
YLR381W	CTF3	0.87	0.96	1.0939	1.41816
YDR264C	AKR1	0.38	0.33	1.15241	1.35721
YIL090W	ICE2	0.29	0.37	0.98189	1.50053
YJR117W	STE24	0.65	0.71	1.06159	1.41618
YPL053C	KTR6	0.49	0.28	1.20233	1.24102
YPL002C	SNF8	0.78	0.9	0.937025	1.49936
YGR121C	MEP1	1	1.32	1.12245	1.27799
YBR099C	YBR099C	1.4	1.46	1.06937	1.32832
YML130C	ERO1	1	0.9	0.965454	1.33989
YJR146W	YJR146W	1.13	1.29	2.81046	-0.564766
YOR319W	HSH49	0.45	0.62	0.90931	1.29555
YGR003W	CUL3	0.46	0.47	1.0859	1.09484
YGL007C-A	YGL007C-A	1.22	2.16	0.360424	1.80447
YMR266W	RSN1	0.75	0.82	1.07175	1.0797
YBR295W	PCA1	1.3	1.27	1.0953	1.01339
GTK30L00170	GTK30L00170	1.41	1.33	0.717699	1.39038
YDR524C-B	YDR524C-B	0.27	0.5	0.703171	1.31422
YDR492W	IZH1	1.12	1.37	0.951571	1.05862
YLR040C	AFB1	0.84	0.64	0.684253	1.30595
PsXyl3	PsXyl3	0.8	0.8	0.860853	1.12909
YJL116C	NCA3	1.12	0.98	0.78197	1.1884
YPL250C	ATG41	1.3	0.93	0.544879	1.38209
YHR050W	SMF2	0.51	0.34	0.77051	1.15224
YIL132C	CSM2	1.3	1.29	0.830356	1.08731
YOL015W	IRC10	1.56	1.16	0.872478	1.0347
YLR107W	REX3	1.26	1.04	0.64607	1.25932
YBR182C	SMP1	1.35	1.3	0.785405	1.11641
YML067C	ERV41	0.57	0.37	0.702492	1.19317
YEL063C	CAN1	0.75	0.67	1.16689	0.720878
YOR213C	SAS5	0.45	0.65	0.73964	1.14573
YML095C	RAD10	0.9	0.68	1.02196	0.845867
YMR095C	SNO1	1.31	0.87	0.435213	1.4213
YBR302C	COS2	0.81	1.35	0.792535	1.03349
YDR438W	THI74	0.41	0.61	0.833177	0.962277
YLR064W	PER33	0.9	1.03	0.829833	0.915489
YML102W	CAC2	0.64	0.93	0.848336	0.832827
YGR057C	LST7	0.81	0.88	0.525396	1.13137
YJR106W	ECM27	0.63	1.18	0.734536	0.894
YOR306C	MCH5	1.44	1.29	0.716767	0.900412
YNR055C	HOL1	0.17	0.67	0.71559	0.864518
YIR032C	DAL3	0.56	1.29	0.607365	0.90472
YPR154W	PIN3	0.98	1	0.613798	0.879345
YHR056W-A	YHR056W-A	1.26	2	0.0555691	1.43523
YJL196C	ELO1	0.59	0.74	0.827663	0.640818
YOR381W	FRE3	1.4	1.45	0.652504	0.791626
YKR039W	GAP1	0.32	0.34	0.773313	0.660007
YDL133W	SRF1	0.99	0.98	0.592933	0.838058
YBR103W	SIF2	1.2	1.46	0.645208	0.762216
YPL250W-A	YPL250W-A	0.56	1.3	0.0555691	1.34212
YJL152W	YJL152W	0.94	0.65	0.268563	1.10509
YLR455W	PDP3	0.78	0.54	0.522427	0.841227
YDR333C	RQC1	0.92	0.92	0.542351	0.802144
YDL175C	AIR2	1.03	0.44	0.431945	0.905376
YPL104W	MSD1	0.3	0.44	0.537438	0.793458
YOL032W	OPI10	1.46	1.24	0.203668	1.10309
YLR228C	ECM22	0.39	0.35	0.622705	0.677956
YLR459W	GAB1	0.48	0.26	0.569292	0.718118
YPL222C-A	YPL222C-A	1.51	0.98	0.318604	0.967729
GTK30H00130	GTK30H00130	0.52	0.57	0.408585	0.863569
YJL172W	CPS1	0.31	0.64	0.562647	0.674532
YIR025W	MND2	0.73	0.65	0.263968	0.949807
YPL095C	EEB1	0.98	0.61	0.531303	0.677052
YGR243W	MPC3	-0.38	-0.51	-4.48264	-4.38931
YKR093W	PTR2	-1.09	-0.7	-4.46066	-4.38835
YDR096W	GIS1	-0.37	-0.46	-3.65252	-3.96334
YBR120C	CBP6	-0.81	-0.65	-3.81642	-3.33324
YNL144C	YNL144C	-0.49	-0.89	-3.39906	-3.60843
YKL109W	HAP4	-0.46	-0.36	-3.40239	-3.57278
YPR160W	GPH1	-0.33	-0.2	-3.23816	-3.06935
YGR086C	PIL1	-0.46	-0.83	-3.21521	-3.0556
YER067W	RGI1	-0.35	-0.69	-2.89885	-3.25905
YNR001C	CIT1	-0.25	-0.45	-2.9949	-3.13054
YIL050W	PCL7	-0.63	-0.6	-3.00869	-3.11263
YAL055W	PEX22	-0.92	-1.26	-3.00583	-2.83066
YDL182W	LYS20	-0.19	-0.86	-2.97161	-2.83547
YFR015C	GSY1	-0.47	-0.56	-2.72911	-3.05282
YGL062W	PYC1	-0.22	-0.23	-2.72314	-2.82929
YKR074W	AIM29	-0.68	-0.73	-2.92369	-2.61636
YMR291W	TDA1	-0.46	-0.2	-2.62815	-2.67701
YLL041C	SDH2	-0.15	-0.48	-2.66095	-2.55768
YOR187W	TUF1	-0.33	-0.5	-2.5481	-2.63935
YCR004C	YCP4	-0.66	-0.45	-2.59225	-2.43897
YCL025C	AGP1	-0.64	-0.21	-2.05583	-2.96603
YBR039W	ATP3	-0.2	-0.56	-2.36874	-2.59324
YLR304C	ACO1	-0.52	-0.38	-2.41862	-2.47317
YDR150W	NUM1	-0.42	-0.48	-2.41375	-2.28858
YPL262W	FUM1	-0.25	-0.33	-2.19501	-2.49659
YDL079C	MRK1	-0.34	-0.73	-2.22327	-2.45082
YOR374W	ALD4	-0.78	-0.57	-2.25883	-2.30274
YCR008W	SAT4	-0.24	-0.4	-2.04653	-2.49239
YKR058W	GLG1	-0.3	-0.6	-2.03281	-2.04255
YDL078C	MDH3	-0.36	-0.55	-2.17159	-1.83716
YCL035C	GRX1	-0.37	-0.44	-2.12965	-1.86501
YOR178C	GAC1	-0.36	-0.27	-1.93624	-2.03962
YPR127W	YPR127W	-0.37	-0.48	-2.12142	-1.80719
YDR432W	NPL3	-0.21	-0.38	-1.8052	-2.09669
YJR104C	SOD1	-0.15	-0.83	-2.02973	-1.77696
YDL004W	ATP16	-0.3	-0.59	-1.76859	-1.93745
YBL100C	YBL100C	-1.49	-1.35	-0.774506	-2.88669
YIR037W	HYR1	-0.75	-0.31	-1.96102	-1.59485
YML091C	RPM2	-0.34	-0.44	-1.69857	-1.76158
YLR079W	SIC1	-0.3	-0.7	-1.77639	-1.66937
YKL085W	MDH1	-0.37	-0.46	-1.68534	-1.7302
YBR010W	HHT1	-0.25	-0.34	-1.69487	-1.64413
YKL062W	MSN4	-0.47	-0.26	-1.62659	-1.62963
Q0045	COX1	-0.32	-0.55	-1.6531	-1.47202
YJR121W	ATP2	-0.25	-0.38	-1.3814	-1.69986
YBR086C	IST2	-0.47	-0.53	-1.46241	-1.55688
YDR277C	MTH1	-0.4	-0.48	-1.64282	-1.33363
YJR085C	YJR085C	-0.22	-0.34	-1.59743	-1.36751
YBL001C	ECM15	-0.27	-0.69	-1.48494	-1.39605
YNL271C	BNI1	-0.31	-0.31	-1.3587	-1.43602
YBL099W	ATP1	-0.16	-0.65	-1.22718	-1.53255
YEL007W	MIT1	-0.41	-0.16	-1.25899	-1.49298
YFL036W	RPO41	-0.46	-0.48	-1.43564	-1.29851
YOR083W	WHI5	-1.33	-1.43	-1.64278	-1.0401
YDR322W	MRPL35	-0.61	-0.77	-1.44383	-1.23495
YFR040W	SAP155	-0.5	-0.51	-1.25418	-1.38316
YGR132C	PHB1	-0.29	-0.37	-1.41092	-1.20874
YPL265W	DIP5	-0.71	-0.63	-1.2764	-1.26008
YMR226C	YMR226C	-0.3	-0.58	-1.3199	-1.16382
YML131W	YML131W	-0.53	-0.15	-1.47817	-0.996915
YDR224C	HTB1	-0.47	-0.43	-1.39449	-1.05747
YMR037C	MSN2	-0.4	-0.34	-1.23842	-1.17899
YBL047C	EDE1	-0.19	-0.31	-1.20727	-1.13407
YLR295C	ATP14	-0.28	-0.67	-1.10365	-1.21086
YPL016W	SWI1	-0.78	-0.44	-1.32394	-0.937518
YBR149W	ARA1	-0.4	-0.28	-1.27884	-0.962528
YML007W	YAP1	-0.2	-0.48	-1.18721	-1.02315
YKL201C	MNN4	-0.86	-0.24	-1.05666	-1.0466
YOR014W	RTS1	-0.37	-0.39	-0.997663	-1.10493
YJL068C	YJL068C	-0.35	-0.31	-1.10757	-0.9468
YAR007C	RFA1	-0.37	-0.78	-1.03176	-1.01147
YHR205W	SCH9	-0.3	-0.54	-0.950572	-1.07921
YGR209C	TRX2	-0.29	-0.29	-1.22987	-0.762369
YDL137W	ARF2	-0.39	-0.4	-1.0473	-0.937164
YDL134C	PPH21	-0.35	-0.38	-0.941131	-0.937459
YHR009C	TDA3	-0.37	-0.39	-0.889274	-0.920805
YMR100W	MUB1	-0.43	-0.29	-0.799025	-0.90002
YLR382C	NAM2	-0.28	-0.67	-1.04619	-0.629519
YHL028W	WSC4	-0.37	-0.53	-0.674868	-0.981287
YMR152W	YIM1	-0.62	-0.64	-0.908677	-0.638369
YLR131C	ACE2	-0.36	-0.77	-0.68574	-0.710987
YIL057C	RGI2	-0.74	-0.73	-0.891137	-0.482451
YDR174W	HMO1	-0.31	-0.41	-0.652968	-0.594353
YHR158C	KEL1	-0.43	-0.28	-0.685443	-0.540002
YPL137C	GIP3	-0.3	-0.31	-0.491471	-0.712893
YJL055W	YJL055W	-0.35	-0.75	-0.583658	-0.614701
