# Supplementary material for: Rewired cellular signaling coordinates sugar and hypoxic responses for anaerobic xylose fermentation in yeast
Source: PLoS Genet. 2019 Mar 11;15(3):e1008037. doi: 10.1371/journal.pgen.1008037 (PMC6428351; doi:10.1371/journal.pgen.1008037)
Supplement: S6 Table — (XLSX) [file pgen.1008037.s016.xlsx]

## Sheet: Sheet Summary
Table S6. Phosphoproteomic analysis in Y22-3, Y127, and Y128 in xylose ±O2.
Sheet Descriptions
Sheet 6-1) All Phosphoproteomics	All phosphopeptides identified for Y22-3, Y127, and Y128 in xylose ±O2.
Sheet 6-2) ClassA Phosphopeptides	Phosphopeptides showing a progressive increase or decrease in phosphorylation across the strain panel in the ratio value of xylose -O2/+O2.
Sheet 6-3) ClassB Phosphopeptides	Phosphopeptides showing an increase or decrease in Y128 compared to both Y22-3 and Y127 in ratio value of xylose -O2/+O2 with little change between Y22-3 and Y127.

## Sheet: 6-1) All Phosphopeptides
Table S6-1) All phosphopeptides identified for Y22-3, Y127, and Y128 in xylose ±O2.
Column Descriptions:
Column 1	Systematic name for each yeast protein. Peptides localized to multiple proteins listed on the same line.
Column 2	Protein name for each yeast protein.
Column 3	Phosphosite(s) location on each protein
Column 4	Peptide containing phosphosite (lowercased letter)
Column 5	Number of phosphosites identified on each peptide
Column 6-17	Log2 transformed count values for each phosphosite in each strain (normalized for protein abundance).
1	2	3	4	5	6	7	8	9	10	11	12	12	13	15	16	17
Systematic Name	Protein Name	Phosphosite(s)	Peptide	# of Sites	Y22-3 Xylose Aerobic A	Y22-3 Xylose Aerobic B	Y127 Xylose Aerobic A	Y127 Xylose Aerobic B	Y128 Xylose Aerobic A	Y128 Xylose Aerobic B	Y22-3 Xylose Anaerobic A	Y22-3 Xylose Anaerobic B	Y127 Xylose Anaerobic A	Y127 Xylose Anaerobic B	Y128 Xylose Anaerobic A	Y128 Xylose Anaerobic B
CpXylA	CpXylA	S(416)	AIVDGTTSLEELEQYVLTHsEPVMQSGR	1	0.525222	0.198262	-0.616172	-0.339213	-0.105236	0.374501	0.529337	-0.378962	-0.607982	-0.0332671	0.27483	0.178679
GTK30D02750 / YDR033W	Gtk30D02750 / Mrh1	T(295);S(299)	APVASPRPAAtPNLsK	2	-0.787352	-0.786462	-0.78589	-0.332006	-0.914378	-0.0620398	2.11175	1.36696	0.308966	0.438824	0.0669031	-0.625281
GTK30F00240	Gtk30F00240	S(50)	QVPTSISsCNGEK	1	-0.0907551	-0.170911	0.758313	2.43656	2.54802	2.46884	-0.709985	-2.11479	-1.86695	-2.19021	-0.638652	-0.429494
GTK30K00190 / YKL217W	Gtk30K00190 / Jen1	S(603)	MIDsNVSK	1	1.58991	1.44991	0.795438	1.02935	0.396246	0.852873	-1.28358	-1.58699	-0.225988	0.107404	-1.27202	-1.85254
GTK30K00190 / YKL217W	GTK30K00190 / Jen1	S(586)	YINQVEEYEADGLSIsDIVEQK	1	1.1411	1.38195	0.791173	0.363205	-0.174668	0.0100707	-0.716216	-0.342372	-0.363107	-0.570584	-0.678284	-0.842268
GTK30K00190 / YKL217W	GTK30K00190 / Jen1	S(11)	IsGEQQQPAGR	1	0.646983	0.893586	0.847368	1.11904	0.42187	0.774152	-0.695943	-1.12665	-0.344091	-0.591563	-0.876186	-1.06857
GTK30L00200	GTK30L00200	T(32)	NISHLDPTGVDNAYIPPEQPEtK	1	-0.420173	-0.666684	-0.0992603	-0.263665	-0.26256	-0.345734	0.246375	0.546069	0.453858	0.696183	0.0817592	0.0338318
GTK30N00600	GTK30N00600	Y(422)	VNNDHINESTVSSQyLSDDNELSLRPATER	1	0.0738368	0.111061	-0.104958	-0.205504	0.269525	-0.574897	-0.670693	-0.0832888	-0.538974	-0.204642	0.971263	0.957271
GTK30N00600	GTK30N00600	T(374);T(376)	NVSRTSPNTtNtK	2	-0.85293	-1.02158	-0.0066131	0.771505	-0.0348571	-0.00538529	-0.556147	-0.899258	0.378641	0.224511	1.07191	0.930206
GTK30N00600	GTK30N00600	S(424)	VNNDHINESTVSSQYLsDDNELSLRPATER	1	-0.113457	0.0679943	-0.193331	-0.0361986	0.166898	-0.215155	-0.16891	-0.280479	-0.242798	-0.317507	0.551598	0.781346
GTK30N00600	GTK30N00600	T(92)	VNSQQETTPGTSAVPENHHHVSPQPASVPPPQNGQYQQHGMMtPNK	1	-0.676554	-0.29042	0.13652	-0.474076	0.124989	-0.137147	-0.299709	-0.534677	-0.294086	-0.122188	1.00884	1.55851
GTK30N00610	GTK30N00610	T(578)	EStEMGGTIESDTTSPR	1	-0.528399	-0.138905	0.287686	0.868074	0.887391	1.0374	-0.860748	-1.5201	-0.436593	-0.657823	0.650663	0.411356
GTK30N00610	GTK30N00610	S(607)	RPGsPNDMIDLTSQDR	1	-0.159714	0.136467	0.211868	0.584146	0.271203	0.454118	-0.401825	-1.02052	-0.128987	-0.595319	0.207455	0.441112
GTK30O04200	GTK30O04200	T(92)	VNSQEETTPGTSAVPENHHHVSPQPASVPPPQNGQYQQHGMMtPNK	1	-0.213557	-0.570448	-0.565447	-0.17606	0.218226	-0.317793	-0.371924	-0.169806	-0.612332	-0.15804	1.54503	1.39215
Homologue_YER103W / YBL075C / YAL005C	Homologue_Ssa4 / Ssa3 / Ssa1	S(415)	NsTIPTKK	1	-1.15032	-1.25212	-0.456832	-0.61242	-0.958081	-0.501856	1.42373	0.827722	1.88523	2.49623	-0.74372	-0.957554
kanR	KanR	Y(24)	LNSNMDADLYGyK	1	-0.715524	-1.44371	-0.695834	-0.961351	-0.670515	-0.56178	1.02231	1.64128	0.769348	0.489254	0.29022	0.836313
kanR	KanR	S(9)	THVsRPR	1	-0.35311	-0.487831	0.345264	-0.0259071	0.201073	0.536789	0.411207	0.393758	-0.213568	-0.0136962	-0.390867	-0.403113
kanR	KanR	S(58)	GsVANDVTDEMVR	1	-0.515065	-0.645699	-0.0477832	-0.00249999	-0.100398	0.075406	0.104543	0.134314	0.390138	0.510542	0.168565	-0.0720639
kanR	KanR	S(162)	MNNGLVDAsDFDDER	1	-0.451583	-0.598014	-0.779078	-0.625886	-0.422926	-0.337248	0.802874	0.645641	0.405032	0.607343	0.445681	0.308165
YAL011W	Swc3	Y(61)	GRDDDDDDDDEESDDAyGEVGNDYDEYASR	1	0.146947	-0.0284049	0.226233	0.374608	0.043158	0.34496	-0.0816101	-0.684671	-0.185096	0.151649	-0.149632	-0.158142
YAL017W	Psk1	S(286)	GDYGNNIsPERPSFR	1	0.0648276	0.228934	0.29439	0.100982	-0.0491332	0.0240132	-0.143198	-0.208923	0.113047	0.405133	-0.279934	-0.550139
YAL017W	Psk1	S(1018)	ISLsPSTESLADSK	1	0.0664409	-0.0437994	-0.330066	0.13751	-0.339445	-0.682479	0.203088	0.307565	0.449615	0.732344	-0.0496338	-0.451141
YAL017W	Psk1	S(185)	RSsLPR	1	-0.367004	-0.348541	0.0963642	-0.300793	-0.107307	0.024113	-0.290501	-0.153488	0.85842	1.08003	-0.189973	-0.301324
YAL019W	Fun30	S(451)	AVVEGFDETsAEPTPAPAPAPVER	1	0.398029	0.0473123	-0.0810658	-0.451298	-0.386576	-0.177637	0.425868	0.486056	-0.294296	0.423116	-0.0619588	-0.327549
YAL022C	Fun26	S(27)	KPILAVPEPALADTHsEEISR	1	-0.247439	-0.0784441	-0.228297	-0.316884	0.108992	0.0781031	-0.0756101	0.221877	0.298928	0.127426	0.143426	-0.0320785
YAL022C	Fun26	S(58);S(60)	EQsVsTEPLDTLPLR	2	-0.0149469	0.434792	0.608183	0.728308	-0.0316035	-0.0214257	-0.294658	-0.441075	0.112599	-0.213685	-0.379574	-0.486915
YAL023C	Pmt2	S(38);S(39)	ESSSISVSEELssADER	2	-0.64019	-0.27047	0.630462	0.450281	0.314974	0.637113	-0.671938	-0.483097	0.613152	0.0873328	-0.246461	-0.42116
YAL023C	Pmt2	S(39)	ESSSISVSEELSsADER	1	-0.513349	-0.052884	0.987276	0.511988	0.376414	0.592578	-0.618783	-0.69526	0.180016	0.101136	-0.411573	-0.457559
YAL023C	Pmt2	S(49)	ESSSISVSEELSSADERDAEDFsK	1	0.521857	0.0954739	0.581383	-0.183705	0.391222	0.195224	-0.317029	0.0403433	-0.921726	-0.237326	-0.255708	0.08999
YAL029C	Myo4	S(1041)	GNKPsRLSDEVK	1	-0.3146	-0.339745	0.352289	0.30358	0.30208	0.468289	-0.672538	-0.745124	0.0212508	0.0215695	0.311518	0.29143
YAL029C	Myo4	S(1044)	GNKPSRLsDEVK	1	-0.408481	-0.317028	0.223446	0.260459	0.376489	0.419957	-0.335302	-0.392067	-0.0287728	0.0167904	0.17262	0.011888
YAL034C	Fun19	S(110)	ISHNGsPR	1	0.115566	0.15112	-0.124677	0.510769	-0.446351	0.0210738	0.843629	0.38615	0.382609	0.127846	-0.770775	-1.19696
YAL034C	Fun19	S(106);S(110)	IsHNGsPR	2	-0.555554	-0.978625	-0.210587	1.88736	-0.478834	-0.305056	1.52021	0.865882	0.545667	-0.0518588	-0.820905	-1.4177
YAL034C	Fun19	S(207);S(211)	LPsPLAsPNLNR	2	-0.260489	0.0147775	-0.367319	-0.449053	-0.459079	-0.683373	0.797907	1.00759	0.258278	-0.0382167	0.0307024	0.148275
YAL035W	Fun12	S(379);T(380)	stPAATPAATPTPSSASPNKK	2	-0.481075	-0.682473	-0.395263	-0.199849	-0.598212	-0.0421081	1.48765	1.2841	0.343821	0.403053	-0.356922	-0.76272
YAL035W	Fun12	S(379)	sTPAATPAATPTPSSASPNKK	1	-0.134079	-0.265316	0.139901	-0.167956	-0.282001	-0.0244246	0.0434149	0.115425	0.389681	0.503976	-0.156918	-0.161704
YAL038W	Cdc19	S(450)	GVFPFVFEKEPVsDWTDDVEAR	1	-0.425477	0.708872	-0.780682	-1.12645	-0.623883	-1.83722	1.11101	1.6044	-0.298481	-0.83564	1.01752	1.48604
YAL038W	Cdc19	S(9)	LTsLNVVAGSDLR	1	-0.202619	-0.42386	-0.25413	-0.575775	-0.351677	-0.786046	0.341563	0.762701	0.283364	0.310856	0.183498	0.712125
YAL041W	Cdc24	S(729)	RVsDVLSK	1	-0.26578	-0.282535	0.569255	0.391447	0.701054	1.05168	-1.33801	-1.59452	0.196272	0.234261	0.137211	0.199673
YAL041W	Cdc24	S(100)	SNGANRDsSDLAPTLR	1	0.131222	0.117745	0.431943	0.73984	0.419148	0.960156	-0.774674	-1.42571	0.0294379	-0.125525	-0.237077	-0.266503
YAL043C	Pta1	S(521)	RKSDDDDDGNDNEEVGNDGPTANsK	1	-0.0140682	0.29449	0.393871	0.0698993	-0.220922	-0.129194	-0.488372	-0.370487	0.122102	-0.15789	0.20739	0.29318
YAL051W	Oaf1	S(155);T(158)	SASPINTNNASGDsPDtKK	2	-0.133725	-0.0972676	0.36345	0.0843478	0.195645	-0.0169846	0.0944594	0.502546	-0.0862343	-0.266455	-0.433595	-0.206187
YAR002W	Nup60	S(483)	SNLsQENDNEGK	1	-0.245167	-0.182614	0.190941	-0.00809497	0.271996	0.462923	0.414737	0.426473	-0.392191	-0.0877222	-0.240317	-0.610966
YAR002W	Nup60	S(10)	RAsATVPSAPYR	1	-0.436864	-0.840621	-0.345547	0.182111	-0.0508055	0.0506923	0.148221	-0.064354	0.620948	0.785088	0.0640467	-0.112917
YAR002W	Nup60	S(312)	RVsPNAAPR	1	0.0530029	-0.102121	0.201942	0.754312	-0.271742	0.283736	0.291574	-0.0808194	0.150521	-0.084109	-0.425297	-0.770999
YAR014C	Bud14	S(254)	FQDSGFQGEKDDLEEENDDYQPLsPPR	1	-0.17239	0.397627	0.711592	0.504169	0.526133	0.278015	-1.04105	-1.14789	0.299279	0.0564291	-0.323568	-0.0883499
YAR014C	Bud14	Y(209);S(222)	yAISEDEDEEENHsDDDDFDR	2	-0.306753	-0.310299	0.277674	0.485034	0.321307	0.672839	-0.562555	-0.741654	0.208239	-0.0624107	0.0620882	-0.0435094
YAR014C	Bud14	S(222)	YAISEDEDEEENHsDDDDFDR	1	0.013362	-0.210035	0.500827	0.510842	0.229933	0.516657	-0.392114	-0.0745804	-0.104375	-0.204065	-0.247633	-0.538819
YAR042W	Swh1	T(1052);S(1055)	IKtANsATGGPK	2	-0.176588	-0.947985	-0.52082	-0.162229	-0.506518	0.13754	1.02522	0.885562	0.136064	0.857778	0.0426436	-0.770666
YAR042W	Swh1	S(687)	GsQESTNTLEEIVK	1	-0.235887	-0.247584	-0.0674932	-0.183939	-0.0441602	0.149086	-0.397027	-0.383414	0.612954	0.435099	0.131612	0.230752
YAR042W	Swh1	S(677);S(682)	KLNNQPPVETEANEDsDDANsMIK	2	-0.599069	-0.536916	-0.431105	-1.03089	-0.124572	0.0208062	-0.100184	0.0112637	0.533597	0.66055	0.721333	0.875185
YAR042W	Swh1	S(731)	ANDsEDLPTNKK	1	-0.217297	-0.749774	-0.238094	-0.0467981	-0.109161	0.158092	-0.340276	-0.28242	0.442684	0.353082	0.462144	0.567818
YBL007C	Sla1	T(818)	AAAStPEPNLK	1	-0.137738	0.239772	0.220593	0.104685	-0.048759	0.0631685	-0.381936	-0.25948	0.351688	0.246571	-0.0038479	-0.394717
YBL007C	Sla1	S(447)	sKSNANASWKDDELQNDVVGSAAGK	1	-1.05304	-1.10865	-0.476675	-0.647316	0.22062	-0.511027	0.317448	0.78218	0.0668634	-0.0646833	0.924787	1.5495
YBL007C	Sla1	S(799)	KSEFTGsMQDLLDLQPLEPK	1	-0.423974	-0.51785	-1.71269	-0.987679	-0.78806	-0.767072	1.60053	1.33558	0.372565	0.197588	0.951635	0.739429
YBL007C	Sla1	S(439)	NFTKSPsR	1	-0.0350028	-0.0913178	0.62252	0.593988	0.269096	0.414135	-0.159084	-0.436693	-0.300263	-0.0470739	-0.397267	-0.433039
YBL008W	Hir1	S(610)	GSDGTSNSIDDIAVLsEEENDFHR	1	0.111859	0.326047	-0.0256248	0.0955429	-0.119767	-0.0995154	-0.245349	-0.225239	-0.0159362	-0.21719	0.294818	0.120355
YBL027W / YBR084C-A	Rpl19B / Rpl19A	S(30)	VWLDPNETsEIAQANSR	1	-0.347357	0.128753	0.107431	-0.399788	0.055568	-0.29362	0.471288	1.3661	0.111291	-0.608241	-0.39822	-0.193205
YBL032W	Hek2	S(381)	SDSASFLEEKEEPQENHDNKEEQs	1	0.271865	-0.480507	-0.438524	-0.660556	-0.429152	0.0128831	0.33033	0.152265	0.0320073	0.278817	0.233475	0.697098
YBL034C	Stu1	S(1018)	KSEGDEEsDDAVDENDVKK	1	0.00299503	-0.149535	0.27992	0.0389682	-0.0529154	0.279997	-0.0387127	0.0165995	-0.200077	-0.174239	0.0087898	-0.0117914
YBL037W	Apl3	T(727)	RNtIDDVNSK	1	0.225358	0.102859	0.0341418	0.384191	0.153855	0.324338	-0.847736	-0.966698	0.267285	0.155646	0.167097	-0.000335541
YBL042C	Fui1	T(61)	DTDSENNItIAQDDEK	1	0.494544	1.21222	0.916019	0.304651	1.545	-0.157085	-1.64831	-2.02806	-1.91476	-0.337783	0.607509	1.00606
YBL047C	Ede1	S(931)	FVETTVENsNLNVNR	1	-0.920398	-1.0538	-0.414049	-0.627474	-0.718717	-0.0326796	2.38551	2.18494	-0.0650267	-0.0181153	-0.267318	-0.452874
YBL047C	Ede1	S(1087)	ANsNEDGESVSSIQESPK	1	-0.135986	0.382538	0.995819	0.918736	0.654732	0.76861	-0.9473	-0.899501	0.144507	-0.499911	-0.711771	-0.670472
YBL047C	Ede1	S(1087);S(1100)	ANsNEDGESVSSIQEsPK	2	0.662947	1.50905	-0.0266616	-0.082242	-0.134947	-0.329508	-0.455638	-0.0434538	0.343811	-0.101342	-0.389512	-0.952507
YBL047C	Ede1	Y(1173)	yPAPGTSPSHNEGNSK	1	0.142451	-0.025285	0.193812	0.315792	0.141724	0.178968	0.0978809	0.211069	0.163802	0.199124	-0.739669	-0.879668
YBL047C	Ede1	S(241)	TTPLsANSTGVSSLTR	1	0.540652	0.434602	-0.517313	-0.392032	-0.432827	-0.574953	0.779103	0.838755	-0.300607	-0.889573	-0.0690073	0.5832
YBL047C	Ede1	S(1095);S(1096);S(1100)	ANSNEDGESVssIQEsPK	3	-1.0535	-1.01092	-0.463312	-0.560265	-0.333837	-0.199848	0.544621	0.268744	0.557797	0.801801	0.748234	0.700492
YBL047C	Ede1	S(1008)	SQsLTSSVANNAPQSVR	1	-0.383823	0.0537803	0.327743	-0.235614	0.213847	-0.75388	-0.314061	0.485266	0.457384	-0.0627449	-0.30109	0.513193
YBL047C	Ede1	S(1187)	YPAPGTSPSHNEGNsKK	1	0.483112	0.452357	0.168787	-0.0616036	0.156301	-0.0921144	-0.131675	-0.142765	-0.674744	0.120775	-0.00178185	-0.276649
YBL051C	Pin4	S(56)	DAIDKENGVQTETGENsAK	1	-0.782495	-0.878626	-0.647054	-0.391389	-0.323305	-0.149863	0.348343	0.0436845	0.70462	0.69902	0.69989	0.677173
YBL051C	Pin4	S(655)	SLsGLDLQNQNK	1	-0.38978	-0.107484	-0.143624	-0.191617	0.234393	-0.21825	0.0181001	0.282946	0.315917	0.0646748	-0.035006	0.16973
YBL051C	Pin4	S(638)	SLsHSGLDDGLEQGLNR	1	-0.217268	-0.430706	-0.225878	-0.504682	-0.352687	-0.58302	0.0493507	0.676413	-0.0694517	0.0173741	0.815934	0.82462
YBL058W	Shp1	S(225)	LGSTIDAADEVVEDNTsQSQR	1	-1.04217	-1.0126	-0.693319	-0.73345	-0.412477	-0.576502	0.947878	0.806433	0.656503	1.02619	0.543583	0.489923
YBL061C	Skt5	T(138)	QTNSSTSLtK	1	0.051571	-0.19397	0.392104	0.473063	0.758695	0.835014	-0.563894	-0.760983	0.0412972	0.218382	-0.679773	-0.571506
YBL061C	Skt5	T(624)	TGSDtSIR	1	-0.403592	-0.0824415	0.502285	0.378735	0.299407	0.668716	-0.277053	-0.501401	0.352813	0.1895	-0.473861	-0.653109
YBL067C	Ubp13	S(261)	EGsPALLTTGKPSSRPQDAPPLIVETPNEPGAPSR	1	1.02186	1.4371	-0.391803	-0.972239	-0.50267	-0.856427	0.230901	0.224507	-0.379519	-0.510571	0.0212276	0.677626
YBL085W	Boi1	Y(98)	yGNLNDSASNIGK	1	-0.317767	-0.64448	-0.569323	-0.24633	-0.401084	-0.256937	0.855539	0.469883	0.311009	0.569417	0.121626	0.108446
YBL085W	Boi1	S(405)	APKPPSYPsPVQPPQSPSFNNR	1	-0.280828	-0.256024	0.0797088	0.358678	0.189931	0.525051	-0.312188	-0.158539	0.295696	-0.219369	0.0276798	-0.249797
YBL085W	Boi1	S(209)	sLEPSSESVR	1	-0.0839058	-0.246606	0.200626	0.271244	0.26526	0.431162	-0.583345	-0.683574	0.25904	0.231392	-0.0576742	-0.00361762
YBL085W	Boi1	S(203);S(209)	sNISTKsLEPSSESVR	2	-0.00907103	-0.218807	-0.757289	-0.415661	-0.2623	-0.436511	0.318047	-0.031337	-0.331115	-0.0388022	1.04173	1.14112
YBL085W	Boi1	T(652);S(653)	tsLSPINSK	2	0.111984	0.281664	0.692315	0.855416	0.455429	0.827009	-0.342978	-0.561478	-0.596319	-0.816889	-0.320431	-0.585721
YBL085W	Boi1	S(412)	APKPPSYPSPVQPPQsPSFNNR	1	-0.139308	-0.281373	0.205459	0.366566	0.171821	0.258533	-0.120772	-0.161433	-0.0907533	-0.0730775	-0.0264475	-0.109215
YBL085W	Boi1	S(405);S(412)	APKPPSYPsPVQPPQsPSFNNR	2	-0.180822	-0.159727	0.311367	0.45385	0.123942	0.453083	-0.486185	-0.576223	0.205079	-0.0130746	0.026619	-0.157907
YBL086C	Ybl086C	T(427)	THNDEDNENtANDKGSDKDNNFVEDNNPTDFLTDR	1	0.0317599	0.217721	0.534834	-0.203656	-0.318946	-0.083809	0.997981	0.583862	-0.133674	0.526251	-1.11195	-1.04037
YBL086C	Ybl086C	T(418)	tHNDEDNENTANDKGSDKDNNFVEDNNPTDFLTDR	1	0.229718	0.438772	0.175806	-1.55477	-0.135162	0.168854	1.04532	0.937226	0.20699	1.04867	-1.52267	-1.03875
YBL097W	Brn1	S(245)	KEEELIERDsLVDDENEPSQSLISTR	1	-0.152304	-0.0336931	0.0845181	0.212569	0.19365	0.000690333	-0.140475	-0.028473	0.117054	0.159779	-0.102444	-0.310872
YBL099W	Atp1	S(178)	RsVHEPVQTGLK	1	0.382562	0.3778	0.828359	1.30915	0.65472	0.598931	-0.887147	-1.09065	-0.422065	-0.562394	-0.556428	-0.632836
YBL101C	Ecm21	S(33)	GQPFQPsPTKK	1	0.0163738	-0.0256272	0.202512	0.0983561	0.37908	0.497218	-0.235696	-0.284614	0.0768034	0.307454	-0.439073	-0.592787
YBL101C	Ecm21	S(140)	TSGRLsVDQEPR	1	-0.0205937	-0.0185052	0.22345	0.110158	0.187472	0.24859	-0.246891	-0.400894	0.177939	0.392866	-0.321376	-0.332214
YBL101C	Ecm21	S(960)	TTsVSGPSGYSDDAGVPNVNR	1	-0.325585	-0.919503	0.191908	-0.580992	-0.501994	-0.200471	0.179891	0.514155	0.454334	1.00266	0.00144549	0.184153
YBL103C	Rtg3	S(227)	VRsPSSSFR	1	0.35006	0.0917088	-0.188355	0.209557	0.163975	0.25882	-0.368284	-0.471478	0.0491318	0.0435506	-0.00652727	-0.132158
YBL103C	Rtg3	S(142)	SSYSMAYDsPVDR	1	0.178228	0.678614	-0.320975	-0.146748	0.0671345	-0.423229	-0.18133	-0.0920044	-0.00624945	-0.590215	0.263193	0.573582
YBR001C	Nth2	S(112)	GsEDDSFLSSQGNR	1	0.155665	0.511316	0.143397	0.511542	-0.0464309	0.000162202	-0.149089	-0.395246	0.13294	-0.536412	-0.236482	-0.0913624
YBR007C	Dsf2	S(395)	DLESEGSsPIR	1	0.0579797	-0.139542	0.530724	0.689308	0.449034	0.898205	-0.448266	-0.617911	-0.310431	-0.369797	-0.27904	-0.460263
YBR028C	Ypk3	T(107)	LSItPQDIISSNIGENELSR	1	0.598167	1.46136	0.506336	0.189295	-0.0558664	-1.15402	-0.541843	-0.134619	-0.586458	-0.925109	0.0796644	0.563091
YBR028C	Ypk3	S(90)	RFsITGSDAMPTNTNR	1	-0.248582	-0.192185	0.165868	0.793004	-0.0888482	-0.00167999	-0.0534109	-0.155354	-0.0127424	-0.394824	0.237715	-0.0489602
YBR031W	Rpl4A	S(282)	VGYTLPSHIIsTSDVTR	1	-0.338252	-0.315002	-0.71607	-0.713991	-0.565137	-0.606565	1.48939	1.10005	-0.0806586	0.082176	0.21073	0.453329
YBR031W	Rpl4A	S(284)	VGYTLPSHIISTsDVTR	1	-0.278348	-0.686017	-0.712434	-0.637868	-0.76178	-0.405125	1.80833	1.36841	-0.0955436	0.199561	0.0397739	0.161043
YBR038W	Chs2	S(133)	DNADLPVDPYHLsPQQQPSNNLFGSGR	1	-0.0736313	0.276601	0.0848338	0.0861938	0.101851	-0.948163	-0.0250468	0.400569	-0.0996799	-0.601876	0.0116732	0.786676
YBR038W	Chs2	Y(68)	AALRySPDRR	1	-0.310655	-0.21656	0.256053	0.420999	0.0904932	0.417811	0.0165974	-0.131003	0.0164033	-0.268113	-0.0688913	-0.223135
YBR038W	Chs2	Y(93)	yAANLQESPKR	1	-0.268207	-0.231271	0.524584	0.298766	0.502705	0.43139	-0.191602	0.222168	-0.517408	-0.319227	-0.0500708	-0.401825
YBR049C	Reb1	S(56)	KQNIVESSsDVDVNNNDDSNR	1	-0.428452	-0.4036	0.439274	0.228803	-0.164021	0.337467	-0.122031	-0.0574792	0.628322	0.136682	-0.353092	-0.241873
YBR054W	Yro2	S(299);S(301);S(302)	SSDsDssIKEK	3	-0.65525	0.341345	0.469533	-0.374738	-0.687242	-0.161766	1.15765	1.29948	0.73261	0.172312	-1.0173	-1.27663
YBR054W	Yro2	S(301);S(302)	SSDSDssIKEK	2	-0.437822	-0.299173	-0.753578	-0.205994	-0.962907	-0.374505	1.94573	2.0087	1.14198	1.10881	-0.933398	-2.23783
YBR054W	Yro2	T(341);S(343)	AQEEEEDVAtDsE	2	0.337241	0.161356	-0.457731	-0.199247	-1.02057	-0.407452	1.55217	1.18252	0.689717	0.572243	-1.10083	-1.30942
YBR059C	Akl1	S(523);S(524)	STSSYssGGR	2	-0.265607	-0.315513	0.153293	0.615815	0.0713265	0.415303	0.0985184	-0.0269364	0.236046	-0.100929	-0.293577	-0.587739
YBR059C	Akl1	S(407)	IPsQNVGQELEEEKESQSDQR	1	-0.0927059	-0.128625	-0.597695	-0.831871	-0.463662	-0.36289	0.987232	1.09648	0.00707618	0.380125	0.159754	-0.153215
YBR059C	Akl1	T(499);S(504)	QSSDPtISEQsPR	2	0.0948585	-0.0869662	-0.559021	0.0885016	-0.359188	-0.1474	0.469977	0.261101	0.619174	0.30324	-0.265801	-0.418477
YBR059C	Akl1	S(504)	QSSDPTISEQsPR	1	0.356902	0.541724	0.158437	0.246395	0.154463	-0.143383	-0.230002	-0.442201	-0.42049	-0.162448	-0.0193093	-0.040087
YBR059C	Akl1	S(960);S(971)	QsLDLNFQEVNLsSPTLTQEHR	2	-0.0337516	0.247462	-0.575946	-0.134029	-0.389545	-0.556085	0.536487	0.51208	0.188323	-0.477309	0.274432	0.407881
YBR059C	Akl1	S(1048)	DKDsNSSITISTSTPSEMR	1	1.10594	0.987721	-0.636817	-0.356339	-0.302285	-0.320696	0.881266	0.598333	-0.622887	-0.946049	-0.425213	0.0370305
YBR059C	Akl1	S(971)	QSLDLNFQEVNLsSPTLTQEHR	1	0.0532762	-0.00829693	-0.32197	-0.293373	-0.415993	-0.524277	0.643981	0.57059	-0.0265745	-0.0990195	0.0672812	0.354376
YBR059C	Akl1	S(1072)	ARQsLDLER	1	-0.000641785	-0.3621	-0.0873275	0.346054	-0.0500855	-0.0303643	-0.156174	-0.127749	0.274434	0.268925	0.0197953	-0.0947654
YBR059C	Akl1	S(496)	QSsDPTISEQSPR	1	0.00499932	0.473627	-0.0796021	-0.15054	-0.0801891	-0.272542	0.106083	0.32068	0.249043	-0.343546	-0.200334	-0.0276787
YBR068C	Bap2	S(16)	ETsPDSISIR	1	0.746227	0.725732	0.7489	0.667465	0.609112	0.840072	-0.795134	-0.932853	-0.444853	-0.468717	-0.864253	-0.831699
YBR068C	Bap2	T(15);S(19)	KEtSPDsISIR	2	0.316581	0.162601	-0.011226	0.333865	0.283954	0.169471	-0.361549	-0.509008	0.031116	0.317011	-0.258876	-0.47394
YBR068C	Bap2	S(16);S(19)	ETsPDsISIR	2	0.094616	-0.289668	0.314422	0.533367	0.136906	0.315176	-0.480122	-0.744765	0.106894	0.221389	-0.172716	-0.0354996
YBR069C	Tat1	S(80)	NsELESQEKNNLTK	1	1.42591	1.66505	0.996982	0.675983	0.861274	1.15677	-1.96963	-2.12495	-0.413593	-0.466468	-0.900941	-0.90638
YBR069C	Tat1	S(13)	EAsPAQYSHSLHER	1	0.785718	1.13945	0.172012	0.542967	0.154877	0.0173069	-0.17132	-0.541762	-0.402781	-0.416135	-0.538505	-0.741829
YBR072W	Hsp26	T(42)	QLANtPAK	1	-0.927222	-1.31999	-0.720327	-0.398401	-1.10396	-0.325543	1.70398	1.42299	1.97317	1.72332	-0.925632	-1.10237
YBR072W	Hsp26	S(211)	KIEVSSQEsWGN	1	-0.415813	-0.268142	-0.358747	-0.225948	-0.571441	-0.258879	0.467074	0.501517	1.40313	0.863711	-0.524206	-0.612258
YBR072W	Hsp26	Y(167)	RVITLPDyPGVDADNIK	1	-0.457875	-0.269181	-0.444988	-0.355996	-0.409436	-0.703558	0.023124	0.152132	1.24915	1.48239	0.040026	-0.305788
YBR074W	Pff1	S(608)	GSNsMEEGLSTR	1	0.443595	0.709312	0.501282	0.736157	0.664093	0.832016	-0.523382	-0.8727	-0.384843	-0.584541	-0.700745	-0.820244
YBR081C	Spt7	S(88)	SFPLTQEEEHHGAVsPAVDTR	1	0.0622952	-0.0827471	0.236078	0.228096	0.0958068	0.333752	-0.346531	-0.505853	-0.0957079	0.106641	0.0480588	-0.0798888
YBR086C	Ist2	S(704)	AVDNDTAGsAGK	1	-0.815662	-0.72485	0.196626	-0.265116	-0.182323	0.180224	0.0685432	0.342172	0.907073	0.763145	-0.174258	-0.295575
YBR086C	Ist2	S(720)	RNsLVK	1	-0.289579	-0.493203	-0.211274	-0.442746	-0.168255	-0.0697218	-0.359734	-0.291491	0.72392	0.890242	0.304921	0.406919
YBR086C	Ist2	S(844)	DANIKPVVNAAVNDNQsK	1	-0.409408	-1.134	-0.774042	-0.914172	-0.893996	-0.360051	0.754241	1.28109	0.580738	-0.0364306	0.742467	1.16356
YBR086C	Ist2	T(775);S(780)	SSAESSNATNNNtLGTEsK	2	-1.33431	-2.02542	-0.782978	-0.421948	-0.253051	-0.584362	0.819897	0.57155	0.853025	1.01755	0.697417	1.44264
YBR095C	Rxt2	S(249)	GAsDEDDINNK	1	-0.421474	0.00638965	0.660557	0.330717	-0.00334202	0.509669	-0.161575	-0.273993	0.548127	0.445182	-0.622292	-1.01797
YBR105C	Vid24	S(27)	QSEQAAsPEPTPAPPVSR	1	-0.292971	-0.199063	-0.0612419	-0.018324	-0.276847	-0.372749	0.187763	0.0104492	0.292998	0.41886	0.150299	0.160827
YBR108W	Aim3	S(58);S(64)	KNSsDEEYDsEDEMEYER	2	0.220266	0.239598	0.286977	0.231917	0.0248913	0.325339	0.0293494	-0.014768	0.348801	0.627373	-0.910285	-1.40946
YBR108W	Aim3	T(727)	KRAPtPPAPSR	1	-0.103695	-0.138283	0.211282	0.611049	0.168965	0.152688	-0.274571	-0.597036	-0.108312	-0.11903	0.106331	0.0906119
YBR112C	Cyc8	S(744)	LNSPNsNINK	1	0.469431	0.442076	0.285211	-0.159256	-0.0996401	-0.0394965	-0.410322	-0.483641	0.162122	0.343194	-0.406802	-0.102877
YBR114W	Rad16	S(109)	DVsDDDEPLTK	1	-0.105535	-0.145758	0.290924	0.315403	0.372408	0.461918	0.0383181	0.0717384	0.0217912	-0.104882	-0.617906	-0.59842
YBR114W	Rad16	T(29)	KSVNYNELSDDDtAVK	1	0.261727	-0.0838464	0.110985	0.270251	0.274974	0.485287	-0.108671	-0.0434727	-0.27255	-0.249072	-0.266466	-0.379147
YBR114W	Rad16	S(25)	SVNYNELsDDDTAVK	1	0.22179	-0.0189805	0.0955169	-0.0528766	0.164067	0.508631	0.0470237	0.208246	-0.0491183	-0.068282	-0.47928	-0.576738
YBR127C	Vma2	S(511);S(515)	KDAsQEEsLI	2	-0.402786	-0.881999	-0.19552	-0.235212	-0.57061	-0.0603191	0.709907	0.524198	0.414428	0.85732	0.0445803	-0.203989
YBR127C	Vma2	S(515)	KDASQEEsLI	1	-0.271288	-0.246991	-0.395272	-0.272994	-0.369036	-0.125459	0.44767	0.31189	0.744296	0.81265	-0.156369	-0.479095
YBR127C	Vma2	S(4)	VLsDKELFAINK	1	0.147276	0.436934	-0.832411	-1.22467	-0.653407	-0.95821	1.17502	1.40554	-0.98595	-1.12675	1.14948	1.46716
YBR130C	She3	S(425)	KRNSMVVHGAQs	1	-0.357017	-0.541067	0.238274	0.145547	0.159016	-0.250291	-0.0708235	0.24896	-0.195243	-0.291396	0.225794	0.688247
YBR130C	She3	S(417)	RNsMVVHGAQS	1	-0.185726	0.0102422	-0.0409012	0.70692	0.400932	0.151382	-0.259613	-0.0985683	0.0663702	-0.280331	0.0189374	-0.489645
YBR130C	She3	S(394)	TNVTHNNDPSTsPTISVPPGVTR	1	0.162036	0.343401	0.0942242	0.341494	0.177267	0.333396	-0.0335743	-0.532262	-0.294787	-0.191654	-0.105166	-0.294375
YBR140C	Ira1	S(497)	IFsLDDISSFNSSR	1	0.960272	1.41931	-0.286222	-0.787925	-0.111763	-0.938688	0.33836	0.872887	-0.615665	-1.06028	-0.284982	0.494698
YBR150C	Tbs1	S(212)	sASDKEDTWPDFVPIDR	1	-0.197116	-0.218829	0.0964787	0.274182	0.567683	0.757737	-0.974279	-1.37245	-0.513683	-0.619539	1.02092	1.1789
YBR156C	Sli15	S(496)	KLSPNIADIsKPESR	1	-0.191525	0.458234	0.260244	0.0909357	-0.0641122	-0.333843	-0.00559751	0.0479321	0.137687	-0.128297	-0.136697	-0.134962
YBR157C	Ics2	S(94)	RNsSICPR	1	0.607658	0.499561	-0.299215	0.287727	-0.217091	-0.254798	-0.251249	-0.744114	0.12522	0.162763	0.0346767	0.0488603
YBR167C	Pop7	S(115)	TIEVLDEVITEGQADIDMEsDVEDDDKETQLK	1	0.445088	-0.000477744	0.301227	0.462078	-0.223099	-0.0487814	-0.0339408	0.131415	-0.449302	-0.337406	-0.039973	-0.206828
YBR169C	Sse2	S(679);S(682)	AAsDDsDDNNDENMDLD	2	-0.553433	-0.423613	0.543237	1.20716	0.0770988	0.389445	0.105838	-0.667824	-0.159038	-0.417318	-0.0137018	-0.0878521
YBR172C	Smy2	S(128)	VsTPVQQHPLLQR	1	0.362476	0.433049	0.173814	0.232499	-0.13068	-0.0632166	-0.456294	-0.664828	-0.16028	-0.203435	0.210964	0.265931
YBR172C	Smy2	T(70)	SNtPLLGGR	1	0.620622	0.696411	-0.247432	0.19757	-0.105323	-0.278483	0.13952	0.154498	-0.225476	-0.131911	-0.18191	-0.638086
YBR181C / YPL090C	Rps6B / Rps6A	T(163)	REVtKGEK	1	-1.26213	-1.14935	-0.523805	-0.171014	-0.854841	-0.205248	1.52847	1.19582	1.59377	1.37186	-0.481463	-1.04207
YBR181C / YPL090C	Rps6B / Rps6A	S(232);S(233)	AssLKA	2	0.824622	0.862698	1.22956	1.30113	1.22046	1.67055	-1.08016	-1.50982	-1.10364	-1.21142	-1.09084	-1.11314
YBR188C	Ntc20	S(139)	VLQEPDRDNDDsG	1	0.188802	0.0230074	0.10406	0.22477	0.142451	0.236126	-0.167557	-0.382342	-0.152671	-0.0376782	-0.115085	-0.0638833
YBR189W	Rps9B	S(184)	KAEAsGEAAEEAEDEE	1	0.831799	-0.467911	-0.143535	0.00288374	-0.163302	-0.146709	-0.0142539	0.198721	0.0985127	0.69331	-0.609221	-0.280296
YBR198C	Taf5	S(411);S(415)	KDsNLSsPAR	2	-0.583172	-0.401938	0.441861	0.536494	0.266279	0.493426	-0.418627	-0.399367	0.604423	0.0800395	-0.310764	-0.308654
YBR207W	Fth1	S(453)	SKDSsVPLIIDSSGSAN	1	0.088924	0.427703	0.772972	1.10267	0.811439	1.29261	-0.517373	-1.15906	-0.332303	-0.54424	-0.823659	-1.11968
YBR207W	Fth1	T(120)	DQDRESDEHtADNVK	1	-0.216508	0.0875322	0.956963	0.93355	0.912416	1.37392	-0.816539	-1.25283	-0.00164146	-0.143488	-0.834691	-0.99868
YBR211C	Ame1	S(101)	SLISEsPQNVRNDEDLTTR	1	0.578484	0.516977	-0.227235	-0.0260507	-0.107387	0.0481536	-0.157545	-0.337617	-0.27026	-0.262518	0.183943	0.0610546
YBR212W	Ngr1	S(526)	NGSHsDLVNLQR	1	-0.269592	0.103204	0.278679	0.168101	0.0514405	0.186148	0.0115941	-0.0576471	0.118777	0.0411098	-0.190898	-0.440916
YBR212W	Ngr1	S(524)	NGsHSDLVNLQR	1	0.426293	0.56069	-0.203411	0.0976585	-0.0646415	-0.463287	0.37482	0.5194	-0.0125097	-0.33567	-0.52055	-0.378792
YBR214W	Sds24	S(524)	QRGsIAM	1	-1.06525	-1.13396	-0.333719	-0.189313	-0.610414	-0.321158	0.595985	0.144817	0.758673	0.96191	0.654723	0.537708
YBR215W	Hpc2	S(49)	ETGSDsEDLFNK	1	0.236859	0.354902	0.177696	-0.0102156	0.0732805	-0.100235	-0.223921	-0.151264	-0.141723	-0.192441	-0.12219	0.0992539
YBR215W	Hpc2	T(433)	RLVAAPtVSPPK	1	0.31661	0.0274556	-0.183041	0.385575	0.352082	0.278037	-0.176287	-0.275143	-0.218905	-0.279233	-0.0904594	-0.136692
YBR225W	Ybr225W	S(109)	RSsDSAASSSVSK	1	0.0124716	0.312676	-0.333174	0.331436	0.0703161	-0.32539	0.0653124	0.198872	-0.0148315	-0.944064	0.199905	0.42647
YBR225W	Ybr225W	S(105)	LADDLFSNSsR	1	-0.018098	-0.415363	-0.23034	-0.378542	-0.0714457	-0.850711	-0.0972671	0.267547	0.154325	0.770022	0.262826	0.607047
YBR231C	Swc5	S(40);S(43);S(46)	LGGGsDDsDAsDGGDDYDDGVNR	3	0.197302	0.118216	0.543689	0.703092	0.0574783	0.451025	-0.572308	-0.654777	0.082074	-0.389664	-0.308236	-0.227892
YBR235W	Vhc1	S(915);S(918)	IDTPCEsEDsDLDTDLTSIR	2	-0.0866909	-0.265253	0.246726	0.181995	0.0349737	0.407214	-0.439304	-0.310505	0.3813	0.18413	-0.137006	-0.197581
YBR235W	Vhc1	S(870)	RFsTIEPQTIAK	1	-0.472863	-0.322581	-0.557526	-0.475962	-0.426782	-0.506828	0.122178	0.706425	0.549767	-0.507035	0.785226	1.10598
YBR235W	Vhc1	S(34)	RIsQTYFNYQATPECQK	1	-0.289155	0.0727746	-0.376175	-0.816561	0.154694	-0.54378	0.111898	0.734638	-0.000605772	-0.54997	0.399343	1.1029
YBR245C	Isw1	T(167)	KtEHEEDAELLKEEDSDDDESIEFQFR	1	0.05226	0.27732	0.262523	0.484189	-0.284082	0.087715	-0.036298	-0.260941	-0.176325	-0.289741	0.181922	-0.298542
YBR245C	Isw1	S(181)	KTEHEEDAELLKEEDsDDDESIEFQFR	1	-0.0570253	0.115493	0.0634847	0.0203221	0.179824	0.311766	-0.174868	-0.138597	-0.10381	-0.222208	0.0923946	-0.0867759
YBR247C	Enp1	S(190)	EKESQVEDMQDDEPLANEQNTsR	1	-0.568856	-1.10708	0.296886	0.801384	0.489428	0.996167	0.347348	0.384187	-0.109125	-0.297005	-0.455681	-0.777658
YBR255W	Mtc4	S(481)	AEGEQALEsDKELPNGAGSIYEGAPR	1	-0.708033	-0.47081	-0.314889	-0.241737	0.014302	-0.0420272	-0.473956	-0.310839	0.937399	0.684264	0.545177	0.38115
YBR273C	Ubx7	S(352)	SSTPLsGAASSSCFQYNNVR	1	1.23474	1.70695	-0.430609	-0.662529	-0.931444	-0.535175	1.15586	1.51354	-0.522577	-1.5273	-0.50597	-0.495486
YBR273C	Ubx7	S(388)	YPsETNLTTSR	1	-0.383534	-0.159451	0.120648	0.130099	-0.0636463	-0.0143307	-0.224809	-0.233333	0.404513	0.0986858	0.146828	0.17833
YBR279W	Paf1	S(147)	LDDGDsDDENLDVNHIISR	1	0.00842732	0.446432	0.000127636	-0.00381706	0.195261	-0.530951	-0.217852	0.313289	-0.0180466	-0.579778	0.0320829	0.354825
YBR290W	Bsd2	S(52)	TRDTQTGVEGETEIGSDEEDsIEDEGSSSGGNSTTER	1	0.721952	0.814121	-0.585557	-0.41153	0.719337	0.665086	-0.824501	-0.71827	0.0622349	-0.548598	-0.0934647	0.199191
YCL005W	Ldb16	S(241)	NAsDADIVNIK	1	-0.0889985	0.0613371	0.19507	-0.0583849	0.236533	-0.0777164	0.051292	0.186821	-0.331299	-0.262199	-0.0625973	0.150142
YCL011C	Gbp2	S(24)	RLsDDRDR	1	-0.603867	-0.427916	0.563064	0.569289	0.476959	0.839155	-0.417423	-0.764823	0.540956	0.378889	-0.55969	-0.594595
YCL014W	Bud3	S(1614)	DFVALsDDEDEDGKQNCAVGGPEK	1	0.20447	-0.038205	-0.0216757	-0.0256312	0.470085	0.172117	-0.227148	-0.162465	-0.247525	0.0603979	-0.178206	-0.0062137
YCL014W	Bud3	S(1412)	FPsQDEIPDDR	1	0.0998266	-0.0566782	-0.0655475	-0.169662	0.133371	0.099846	-0.122633	-0.0976536	-0.0615295	0.194232	0.0165125	0.0299159
YCL014W	Bud3	T(1166)	VLTENSNELKDtNNEGK	1	0.147417	0.0699782	0.57438	0.30507	0.490921	0.546701	-0.258409	-0.0807264	-0.135991	0.0887834	-0.818319	-0.929806
YCL014W	Bud3	S(1075)	AADVENLsDDDEHR	1	0.377012	0.176519	0.0120847	0.636042	0.100205	0.108766	0.119376	-0.1382	-0.59062	-0.578198	-0.0180583	-0.20493
YCL014W	Bud3	S(903)	RAVVsSPK	1	0.09194	-0.343281	0.266509	0.330822	0.149983	0.187881	-0.103251	-0.339772	-0.436636	-0.0571596	0.0314544	0.221509
YCL014W	Bud3	S(1153)	TNEDASTLTQKLSPQAsK	1	0.953631	1.74825	0.0631232	0.0457247	0.521918	-0.518576	-0.192415	0.270916	-0.795257	-1.25483	-0.551001	-0.29149
YCL014W	Bud3	T(1566)	ALtPER	1	-0.0858842	-0.458971	0.388488	0.941696	0.329066	0.406489	-0.191538	-0.217459	-0.339518	-0.0649843	-0.100613	-0.60677
YCL024W	Kcc4	S(894)	ITASLsDDDVKEDNGK	1	-0.103068	0.221838	0.776705	0.438661	0.379456	0.772852	-0.91578	-0.977141	0.201774	-0.0728726	-0.339088	-0.383337
YCL024W	Kcc4	S(679)	GGLSPGKsELAPIEESPIVSTTPLIYNDR	1	0.736145	1.15745	0.584422	0.738064	0.20575	-0.259505	-0.845517	-0.696157	-0.354465	-0.964065	-0.326335	0.0242186
YCL024W	Kcc4	S(558)	RQsVNAQK	1	-0.0539156	0.254839	0.174416	0.627182	0.222637	0.24379	-0.683972	-0.975625	0.124048	-0.261245	0.216787	0.11106
YCL032W	Ste50	S(202)	REsPVTVFR	1	0.0928006	-0.0975321	0.120643	0.225932	0.060053	0.380415	0.020422	-0.041106	-0.0121469	0.0537502	-0.281772	-0.521459
YCL037C	Sro9	S(55)	LAPTEIPVSTIsIEDLDATR	1	-0.299772	-0.817412	-0.230356	-0.409767	-0.606626	0.039671	1.73627	1.54164	-0.0537912	0.231098	-0.54572	-0.585229
YCL039W	Gid7	S(294)	YQQSQDIFNIIDPDDDASFSsPPHR	1	0.33907	0.61279	-0.496444	-0.160318	-0.460303	-0.552619	0.24407	0.177773	0.0955305	-0.14158	0.278076	0.0639535
YCL040W	Glk1	T(162)	LGFtFSYPVDQTSLNSGTLIR	1	0.0680544	0.601215	-0.205817	-0.966534	-1.02821	-1.47611	-0.501937	0.126381	0.236256	-0.46288	1.43166	2.17793
YCL050C	Apa1	T(75)	GQTPEGEDPLGKPEEELtVIPEFGGADNK	1	1.52918	1.44316	0.00681189	0.0312803	-0.859035	-0.607474	-0.153735	-0.16299	-0.209448	-0.28138	-0.313774	-0.422602
YCL050C	Apa1	T(60)	GQtPEGEDPLGKPEEELTVIPEFGGADNK	1	1.42698	1.19559	-0.153738	-0.241853	-0.588345	-0.391099	-0.138149	-0.363537	-0.139262	0.0609443	-0.407485	-0.260047
YCL054W	Spb1	S(765)	AGLINDDsDKTEK	1	-0.68716	-1.02588	-0.0308184	0.102529	0.0377514	0.451559	-0.115027	0.129285	1.03964	0.965043	-0.244387	-0.622531
YCL054W	Spb1	T(499)	GGDNEEEWtGFNEGSLEK	1	-1.50091	-1.43012	-0.440837	-0.168048	-0.0643185	0.580921	-0.068849	0.678978	1.85895	1.25019	0.215968	-0.911923
YCL061C	Mrc1	S(807)	NSLELELsDDEDDVLQQYR	1	0.113385	0.4075	0.152519	0.00496655	0.195063	-0.0498099	-0.0404746	0.00124839	-0.101313	-0.12641	-0.319179	-0.237496
YCL069W	Vba3	S(18);S(21)	YSSQQEIEEACGsDVsLNAR	2	-1.48068	-1.15607	1.61841	1.3042	0.87869	1.13642	-1.3703	-1.47108	1.96673	1.41546	-1.61285	-1.22894
YCR011C	Adp1	S(702)	sLLRDEEDVEGTDGR	1	-0.807478	-0.9079	0.0186361	0.363152	0.00588291	0.348355	-0.162823	-0.259694	0.642661	0.463668	0.303121	-0.00758203
YCR011C	Adp1	T(713)	SLLRDEEDVEGtDGRR	1	-0.632989	-0.647304	-0.217884	0.330349	-0.441478	0.134326	0.791015	-0.217398	0.343763	0.188992	0.157574	0.211035
YCR016W	Ycr016W	S(25)	QTISSGDEsK	1	-0.566202	-0.43215	0.261246	0.0942116	0.395581	0.602353	-0.0571591	-0.0793555	0.213154	0.138135	-0.24662	-0.323194
YCR021C	Hsp30	T(331)	ASGETAIHEPEPEAEQAVEDtA	1	-1.60896	-1.04884	-1.28297	0.027464	-0.695946	0.112066	2.30789	0.500586	1.71224	0.90494	-0.432251	-0.496216
YCR021C	Hsp30	S(308)	EAVPEsPR	1	-1.42426	-0.518422	-0.939064	0.46461	-0.969724	0.170389	2.01465	-0.0514275	2.15053	0.901599	-0.832136	-0.966749
YCR023C	Ycr023C	S(313)	RQsVGLIR	1	-0.834084	-0.990637	-0.236771	0.269132	-0.219736	-0.032414	0.0570758	-0.0752158	1.09905	0.989133	0.134462	-0.159999
YCR030C	Syp1	S(275)	EVVPNNASPASATGARPVsVSNGAANTER	1	-0.319809	-0.320108	-0.36509	0.110427	-0.342008	-0.236137	0.293416	0.199907	-0.0558027	-0.482736	0.789293	0.728646
YCR030C	Syp1	S(264);S(267)	EVVPNNAsPAsATGARPVSVSNGAANTER	2	-0.176854	0.0838778	0.0534759	-0.0033688	-0.12326	-0.383502	0.311876	0.463792	-0.0714385	-0.375256	0.00620069	0.214456
YCR030C	Syp1	S(337)	sSHTLR	1	-1.34803	-0.93279	-0.200975	0.0258527	-0.352413	-0.239439	1.1144	1.08125	0.647425	0.119132	0.139593	-0.0540098
YCR033W	Snt1	T(796)	GDPLGtPEKVENMIEK	1	-0.0291774	0.297176	0.426079	0.135147	0.132457	-0.210292	-0.28163	0.0311291	0.100932	-0.129079	-0.348661	-0.124082
YCR034W	Elo2	T(334);S(336);S(338)	NVPtPsPsPKPQHR	3	-0.152426	-0.184684	-0.0998631	0.063289	-0.100058	0.0967732	0.317642	0.0432671	0.277068	0.365081	-0.242363	-0.383726
YCR034W	Elo2	T(334);S(338)	NVPtPSPsPKPQHR	2	0.068871	-0.0331604	0.216548	0.321833	0.166391	0.451239	-0.257133	-0.192327	0.151471	-0.0686606	-0.346149	-0.478924
YCR034W	Elo2	S(338)	NVPTPSPsPKPQHR	1	0.332659	0.632355	0.20862	0.232651	0.536923	0.916296	-0.811139	-1.64646	-0.451924	-0.679331	0.184861	0.544491
YCR042C	Taf2	S(318)	DAQDNDEEEEEGEsDEEEEEGEEERR	1	0.224634	0.0691983	0.202279	0.238146	0.107928	0.37525	-0.474048	-0.385278	0.0798421	-0.0182962	-0.140635	-0.279019
YCR042C	Taf2	S(261);T(268)	LIGQNGEEsEKEKEDtPEHDEEEEGKPAR	2	-0.133389	-0.352763	-0.142561	-0.077203	-0.158922	0.012903	-0.284759	-0.167706	0.297942	0.192819	0.421689	0.39195
YCR048W	Are1	S(29);S(45)	HsVTYDNVILPQESMEVsPR	2	0.304106	0.144455	-0.033069	1.00242	0.0825419	-0.474945	-0.301338	-0.252312	-0.262112	-0.451652	0.209872	0.0320357
YCR048W	Are1	S(48)	sSTTSLVEPVESSEAER	1	-0.42306	-0.388083	-0.161001	-0.199024	-0.00616099	-0.128817	-0.515325	-0.579971	-0.137971	-0.0807269	1.24352	1.37662
YCR048W	Are1	S(45)	HSVTYDNVILPQESMEVsPR	1	0.0946129	-0.22333	0.0449809	0.0903252	-0.169096	-0.0418556	-0.131133	-0.356291	-0.189776	0.573239	0.350412	-0.0420868
YCR057C	Pwp2	S(244)	RPSDDDDNESEDEDKQEEVDIsK	1	-0.324305	-0.563087	0.17643	0.154802	0.391097	0.401582	0.0446236	0.0828181	-0.194412	0.26712	-0.0934338	-0.343236
YCR057C	Pwp2	S(907);S(913)	DNKLPLsNENDFsDEEEDEKELP	2	-0.255968	0.0435871	-0.280373	-0.420618	-0.10847	-0.0586082	0.50277	0.341444	-0.0531211	0.47634	0.195163	-0.382146
YCR057C	Pwp2	S(651)	KMTEAGSLDLIDDAGENsDLEDR	1	-0.215147	-0.228126	0.149168	-0.143546	0.0730196	0.139877	-0.0866735	0.172035	0.173546	0.0934142	-0.0939133	-0.0336543
YCR057C	Pwp2	S(913)	DNKLPLSNENDFsDEEEDEKELP	1	0.16626	-0.130239	-0.228115	-0.5592	0.200023	0.0974563	0.0269373	0.147356	-0.367149	0.213042	0.202043	0.231585
YCR073W-A	Sol2	S(58);T(62)	EAsCKStASAAEGK	2	-0.484612	-0.769763	-0.360377	-0.238322	-0.113671	-0.0592217	0.14641	0.204132	0.473655	0.43906	0.338597	0.424115
YCR073W-A	Sol2	S(42)	KHsVPNISMNALDMTR	1	0.496342	0.508166	-0.307205	-0.062507	-0.284811	-0.361896	0.54957	0.212948	-0.309628	-0.608377	-0.144268	0.311666
YCR073W-A	Sol2	S(58);S(61);T(62)	EAsCKstASAAEGK	3	-0.570678	-0.72202	-0.387601	0.179448	-0.212531	0.0607474	0.456748	-0.00230143	0.229968	0.255661	0.484094	0.228465
YCR077C	Pat1	S(255)	DLsPEEQR	1	-0.0507896	-0.123281	0.178178	0.40225	-0.120274	0.0620258	0.02753	-0.190678	0.373029	0.33927	-0.407674	-0.489587
YCR088W	Abp1	S(365)	FEGLAAsEKEEEEMENK	1	-0.520815	-0.516128	-0.300456	-0.461644	-0.167198	-0.0454014	0.0333556	-0.0150686	0.589829	0.501518	0.365285	0.536724
YCR088W	Abp1	S(183)	KEPVKTPsPAPAAK	1	0.829426	0.739025	-0.347873	-0.0807028	-0.28702	-0.372346	0.420049	0.0204644	-0.649334	-0.24661	0.0347513	-0.0598302
YCR088W	Abp1	T(157)	AStPPVKK	1	0.930229	0.856686	0.375507	0.451149	0.000935251	0.0300773	-0.391249	-0.610693	-0.455146	-0.359328	-0.460276	-0.367891
YCR088W	Abp1	T(526)	RAtPEK	1	-0.226327	0.108117	0.696184	0.0883564	0.210398	-0.150087	-0.29993	0.229233	0.216727	-0.38316	-0.597052	0.10754
YCR088W	Abp1	S(515)	SsAAPPPPPR	1	-0.309562	-0.463773	-0.0233776	0.615648	-0.0845479	0.241842	0.62536	0.368202	-0.196557	-0.135466	-0.011315	-0.626454
YCR091W	Kin82	S(203);S(206)	NLsNGsLNDINENEELQNFHR	2	0.0605924	0.0343447	0.669356	0.0287674	0.601149	0.334414	-0.445303	-0.048893	-0.140155	0.0552759	-0.745639	-0.403909
YCR091W	Kin82	T(274)	AASEPFNtAK	1	-0.0891899	0.134839	-0.0368871	-0.384225	-0.711252	-0.553767	-0.100745	-0.0856388	0.774355	0.778521	0.163719	0.110271
YCR091W	Kin82	T(648)	RNSVSEQEtK	1	0.23772	0.317646	0.0347984	-0.246963	-0.901731	-0.641526	-0.109222	-0.133235	0.791475	0.723473	-0.0530403	-0.0193952
YCR093W	Cdc39	S(2106)	RQTPLQsNA	1	0.123303	0.120278	0.246845	0.386144	0.181079	0.0532471	0.016158	-0.0153184	-0.343741	-0.286645	-0.223644	-0.257706
YDL003W	Mcd1	S(263)	NDQNNDDDDNsVEQGR	1	-0.322396	-0.15828	0.527273	0.0594402	0.114915	0.332615	0.484525	0.224776	-0.104815	0.321113	-0.699502	-0.779664
YDL006W	Ptc1	S(133)	WELPDSVSDDsMDLAQHQR	1	0.0318181	0.157795	-0.270819	1.41903	-0.0997396	-0.664368	0.414939	0.0569701	-0.181037	-0.685208	0.104838	-0.284223
YDL013W	Slx5	S(29)	SNNSPSDNNPNETVILIDsDKEEDASIR	1	0.146953	-0.131579	0.116819	-0.451098	0.408323	0.458968	-0.717015	-0.799715	0.160604	1.2697	-0.115684	-0.346275
YDL019C	Osh2	T(1161)	TAASAGNGPTDDGtK	1	-0.0643415	-0.300916	0.54398	-0.0897039	0.0251167	0.346934	-0.141647	-0.0436631	0.397461	0.914563	-0.760569	-0.827214
YDL019C	Osh2	S(787)	HAPPPVPNETDNDsQYVQDEK	1	-0.823353	-0.802467	-0.482889	-0.26204	-0.485526	-0.324517	0.611124	0.00537268	0.0521012	0.189953	1.12854	1.1937
YDL019C	Osh2	S(451)	RPsNNLSVVSSEIQLNDNLTESGK	1	0.546807	0.731961	-0.0809688	-0.665206	-0.0582818	-0.634115	0.00890829	0.899024	-0.436548	-0.851483	0.0200842	0.519819
YDL022W	Gpd1	S(27)	RSSSSVsLK	1	0.439811	0.184232	-0.414454	-0.310521	-0.53332	-0.424476	-0.520628	-0.655754	0.247964	0.383089	0.780628	0.823429
YDL025C	Rtk1	S(60)	KNTDsDQEDQIK	1	-0.0655399	-0.0743285	0.0519526	0.0422532	-0.000395444	0.288025	-0.459312	-0.833412	0.429674	0.415833	0.0436211	0.161629
YDL031W	Dbp10	S(398);S(400)	LQNSNNEADsDsDDENDR	2	-0.694054	-0.653627	0.516938	0.0871408	0.352737	0.627445	-0.561246	-0.159707	0.42497	0.359888	-0.0393438	-0.26114
YDL031W	Dbp10	S(108)	EIAAFPMLEMSDDENNAsGK	1	-0.178028	-0.112359	-0.0337511	-0.284928	0.13223	-0.0285022	-0.0491501	0.207402	-0.0233872	0.0208229	0.152086	0.197564
YDL031W	Dbp10	S(101)	EIAAFPMLEMsDDENNASGK	1	-0.439711	-0.19163	0.0451272	-0.153719	0.125872	0.0969827	-0.151652	0.046455	0.226557	0.0318384	0.193806	0.170072
YDL035C	Gpr1	S(908)	SSFFSSNIVTNDDENsIEEDKNLR	1	0.864215	1.0544	-0.5516	0.0643882	-0.398123	-0.659604	1.01679	0.836293	-0.476689	-1.06116	-0.454597	-0.234318
YDL035C	Gpr1	S(373)	TNTGsDENVSASGGVR	1	0.128309	0.73802	0.394771	0.210499	0.0588871	-0.157532	0.185766	0.444329	-0.370165	-1.10118	-0.397568	-0.134134
YDL051W	Lhp1	S(19)	RNsFAVIEFTPEVLDR	1	0.115011	0.732324	-0.667348	-0.766271	0.0369759	-0.799154	0.144065	0.402807	-0.262235	-0.375152	0.633531	0.805445
YDL073W	Ahk1	S(188)	TNSDDKCsINDK	1	-0.0633629	0.0222829	0.561504	0.506953	0.633866	1.03285	-0.865241	-1.4935	-0.475047	-0.207977	0.208282	0.139391
YDL081C	Rpp1A	S(96)	DLLVNFSAGAAAPAGVAGGVAGGEAGEAEAEKEEEEAKEEsDDDMGFGLFD	1	-0.152372	-0.0679302	0.422056	0.0847964	0.215485	0.742638	-0.233587	-0.00411833	0.345619	0.124708	-0.597202	-0.880094
YDL081C	Rpp1A	S(62)	DLLVNFsAGAAAPAGVAGGVAGGEAGEAEAEKEEEEAKEESDDDMGFGLFD	1	0.990485	0.817583	0.240343	-0.033868	-0.608412	-0.74463	0.937617	0.97028	-1.19167	-1.50613	-0.368363	0.496764
YDL084W	Sub2	S(24)	MSHEGEEDLLEYSDNEQEIQIDAsK	1	0.574058	0.965669	0.472924	0.59249	0.663421	0.253497	-0.0422466	0.205523	-0.587498	-0.724009	-1.08066	-1.29317
YDL089W	Nur1	S(439);S(441)	sLsPLRKTPLSAR	2	-0.268466	-0.498601	-0.41948	0.303774	-0.191624	-0.138224	0.706487	0.649466	-0.0311173	-0.0108818	0.2042	-0.305533
YDL099W	Bug1	S(87)	SENNDQNDVDEEsEEKEIEQVK	1	-0.15917	-0.197713	-0.361111	-0.287448	-0.284417	-0.17458	-0.304398	-0.616399	0.258612	0.281733	0.850484	0.994408
YDL102W	Pol3	S(30)	RQsIDHGVGSEPVSTIEIIPSDSFR	1	0.403297	0.266695	-0.0511254	0.0410956	0.359246	0.430578	-0.657628	-0.520286	-0.157944	-0.204599	0.104154	-0.0134835
YDL105W	Nse4	S(13)	RNsTVTEPDSSGETR	1	-0.219949	-0.37451	0.305128	0.458402	0.210106	0.548381	-0.17795	-0.258666	0.153318	-0.0122301	-0.270653	-0.361377
YDL106C	Pho2	S(316)	NNSNTNNDDDNDDNsNEDNDNSSEDKR	1	-1.00044	-0.156369	0.370652	-1.85429	0.0101106	0.676208	-0.487983	-0.206627	1.12434	1.05683	-0.016686	0.484249
YDL110C	Tma17	S(68)	LEGADDRLEADDsDDLENIDSGDLALYK	1	1.3321	0.992042	-0.636669	-0.55879	-0.572443	-0.683292	0.331938	0.0935797	0.170163	0.742846	-0.625086	-0.586386
YDL117W	Cyk3	S(209)	SYsANDLHMAR	1	-0.254688	-0.154212	0.344709	0.385685	0.0084616	0.07045	-0.110664	-0.270423	0.413937	0.675736	-0.401755	-0.707236
YDL122W	Ubp1	S(638)	DNEELQEIDNVsLDEPK	1	-0.901732	-0.390389	0.28715	-0.149748	0.199282	0.456345	-0.593296	-0.0718974	1.08301	0.404858	-0.0744128	-0.249169
YDL122W	Ubp1	S(618)	IIEHsDVENENVK	1	-0.334277	-0.413874	0.281379	0.0131973	0.187016	0.636543	-0.702712	-0.598472	0.538916	0.313364	0.0296792	0.0492411
YDL122W	Ubp1	S(618);S(638)	IIEHsDVENENVKDNEELQEIDNVsLDEPK	2	-0.410027	-0.464203	-0.196159	-0.377861	0.0685998	0.301462	-0.137328	-0.047781	0.26904	0.438547	0.405874	0.149836
YDL122W	Ubp1	S(778)	GVQEPKEsQEQGEGEEQEEGQEQMK	1	-0.551767	-0.400322	0.40488	0.237219	0.26474	0.335424	0.277085	0.268964	-0.245685	0.0738259	-0.149253	-0.51511
YDL126C	Cdc48	S(770)	RSVsDAELR	1	-0.00476059	0.0580283	0.148435	0.109955	0.25953	0.453001	-0.157661	-0.317971	-0.0895584	-0.0173533	-0.155985	-0.285659
YDL133W	Srf1	S(43)	KsGSLEALQNAK	1	0.519135	0.958554	-0.0345332	-0.267228	-0.188801	-0.751053	-0.162868	0.330377	-0.313686	-0.948686	0.180753	0.678036
YDL146W	Ldb17	S(463);T(468)	ELDVsAESLtK	2	-0.650023	-0.659058	-0.401914	-0.656204	-0.34484	-0.501507	0.459976	0.695442	0.473389	0.838836	0.463412	0.282492
YDL150W	Rpc53	S(224)	EIQEALsEKPTR	1	-0.735771	-0.873071	-0.375295	-0.243926	-0.202592	-0.0736373	0.0993611	0.486391	0.964722	0.975013	0.249575	-0.27077
YDL150W	Rpc53	S(182)	NLIEDEDDGESEKSsDVDMDDEEWR	1	0.291291	0.321216	1.02145	0.64135	0.936359	1.45447	-0.996616	-1.34947	-0.540093	-0.676233	-0.712386	-0.391332
YDL150W	Rpc53	S(121);S(122)	SEGSGssLVQK	2	-0.711498	-0.697797	-0.419895	0.17603	-0.178611	0.0700004	1.05289	0.512736	-0.0626697	0.030346	0.319788	-0.0913157
YDL153C	Sas10	S(336);S(339)	KLNELQNsEDsDAEDGGK	2	-0.073447	-0.499123	-0.185609	-0.117535	0.125	0.277755	0.0744997	-0.0477329	-0.069727	0.36683	0.129283	0.0198057
YDL153C	Sas10	S(533)	LAELAENVsGDGKR	1	-0.34637	-0.384089	-0.0755101	-0.0609891	-0.110517	-0.126902	0.0901925	0.176011	0.37445	0.511214	0.0677549	-0.115244
YDL153C	Sas10	S(358)	QKQEIDEEEREsDEEEEEEDVDIDDFEEYVAQSR	1	0.20714	0.341918	-0.181643	-0.532077	-0.0303249	-0.185748	0.27361	0.629158	-0.435647	-0.564381	0.166865	0.31113
YDL153C	Sas10	S(483)	GMHDNNGADLDDKDYGSEDEAVsR	1	-0.28937	-0.426699	0.105425	0.58968	0.068362	0.344089	0.105015	-0.241551	0.20275	-0.0882805	-0.192183	-0.177239
YDL153C	Sas10	S(339)	KLNELQNSEDsDAEDGGK	1	0.1632	0.194583	0.387464	0.916238	0.435445	1.07734	0.0240955	-1.01729	-0.540196	-0.672579	-0.470008	-0.498293
YDL156W	Cmr1	S(99)	MGsPDGQDK	1	0.669742	0.910877	0.152249	0.34072	-0.33775	0.0117566	0.273255	-0.0960638	-0.244438	-0.382083	-0.513058	-0.785206
YDL161W	Ent1	S(328)	NQLVAASsPQQLQQQK	1	0.528342	0.741875	0.537869	0.0797421	0.371147	0.223474	-1.20972	-1.1378	-0.190363	-0.32146	-0.0372807	0.41417
YDL161W	Ent1	S(163)	GTGRsDENDDDLQR	1	0.115627	0.00245435	0.51564	0.648992	0.377733	0.475845	-0.392779	-0.567667	-0.203833	-0.183067	-0.412388	-0.376558
YDL164C	Cdc9	T(82)	MDNVSGGEEYAtK	1	0.415484	0.514368	-0.161895	-0.410058	-0.0571969	0.292477	0.222091	0.258411	-0.129378	-0.237408	-0.289104	-0.417791
YDL166C	Fap7	S(188);S(196)	MWLEQHPDGVTNEYQGPRsDDEDDEDsE	2	-0.0306938	0.00747223	0.139031	0.261062	0.188688	0.34089	0.168299	-0.340813	-0.145138	-0.147437	-0.320186	-0.121175
YDL167C	Nrp1	S(634)	TPsNNNISVNTNGGSNAGR	1	-0.144476	0.767728	0.607182	0.258436	0.922827	-0.449063	0.0219915	0.865713	-0.796599	-1.55269	-0.610925	0.109875
YDL173W	Par32	S(246)	GGAGNIIsPK	1	0.434973	0.303055	0.0617766	-0.137025	-0.104641	0.30751	0.228936	0.27113	-0.293882	-0.136103	-0.327163	-0.608567
YDL182W	Lys20	T(417)	KNDSDVPELAtIPAAK	1	-0.298303	-0.206841	-0.150113	-0.348921	0.0464072	0.0888169	0.560928	0.744017	-0.13292	-0.0478461	-0.026	-0.229226
YDL185W	Vma1	S(858)	AVALGsPDR	1	-0.185529	0.310099	0.546197	0.380279	-0.0676988	-0.0473026	-0.424014	0.216982	0.37234	-0.243493	-0.241295	-0.616564
YDL189W	Rbs1	S(435);S(439)	RAsVEGsPSSR	2	0.0931769	0.105319	0.45668	0.40085	0.473111	0.598148	-0.476253	-0.800668	-0.567728	-0.663815	0.0210137	0.360167
YDL194W	Snf3	S(621)	NTISGEIDHsPNQK	1	-0.0278082	-0.0283558	0.46523	1.57594	0.233847	0.210852	-0.650239	-1.13198	0.172061	-0.102078	-0.193092	-0.524374
YDL194W	Snf3	S(629)	EIHsIPER	1	-0.483786	-0.316689	0.560884	0.68243	-0.0153923	0.224407	-0.551492	-0.748934	0.717267	0.365005	-0.227482	-0.206218
YDL195W	Sec31	S(349)	QQEsETDFWNNVSR	1	-0.677505	-0.135417	-0.80975	-0.676935	-0.370164	-0.921892	0.441489	0.722733	0.439219	-0.340243	0.976711	1.35175
YDL195W	Sec31	S(992);S(999)	VPsLVATSEsPR	2	-0.54003	-0.283137	-0.0050786	-0.505841	-0.0542251	-0.438647	-0.107857	0.202999	0.286655	0.296273	0.420535	0.728353
YDL195W	Sec31	S(999)	VPSLVATSEsPR	1	0.0030974	0.258518	-0.133846	-0.235998	0.0628412	-0.420071	0.0366068	0.619106	0.000361189	-0.381702	0.0309395	0.160147
YDL195W	Sec31	S(997);S(999)	VPSLVATsEsPR	2	0.053221	0.536052	-0.272216	-0.0992911	0.115211	-0.132138	-0.455715	-0.584418	0.218837	-0.138025	0.340661	0.41782
YDL222C	Fmp45	S(290)	KQVPsAELEPAGDGGLAGPVTVRD	1	0.700802	0.466646	-0.59509	-0.762719	-0.508265	-0.435584	1.02192	1.30329	-0.0109977	0.294311	-0.608373	-0.865948
YDL223C	Hbt1	S(990);S(993)	GSDYDYNNsTHsAEHTPR	2	0.291306	-0.333407	-0.451147	0.516452	-0.732778	0.211626	1.04176	0.9245	0.725313	0.106798	-0.874449	-1.42597
YDL223C	Hbt1	S(301);S(303)	GYSNTDsNsDRDVIPGNFR	2	0.0429973	-0.372061	-0.568561	-0.153053	-0.389205	-0.286222	0.984644	1.16505	0.179285	0.417972	-0.249161	-0.771685
YDL223C	Hbt1	S(1034)	sISGGTFGFR	1	-0.797407	-0.811045	-0.813113	-0.533111	-0.847621	-0.304267	1.36801	1.72099	1.51286	0.262721	-0.422728	-0.335284
YDL223C	Hbt1	S(33)	DGQGEEEQNNFSFGGKPGSYDSNsDSAQR	1	0.522059	0.46248	-1.25551	-1.84657	-1.8209	-0.809964	2.62032	3.20683	1.06841	0.809838	-1.13438	-1.82262
YDL223C	Hbt1	S(993);T(997)	GSDYDYNNSTHsAEHtPR	2	0.346612	0.216417	-0.0529016	0.649431	0.12706	0.319727	-0.178927	-0.180561	0.242306	-0.110719	-0.484149	-0.894295
YDL223C	Hbt1	S(993)	GSDYDYNNSTHsAEHTPR	1	0.882957	0.31692	-0.339161	0.544867	-0.379557	0.000236605	0.190133	0.089817	0.453307	0.126257	-0.807678	-1.0781
YDL223C	Hbt1	Y(987)	GSDYDyNNSTHSAEHTPR	1	1.0089	0.622626	-0.528415	-0.467406	-0.447458	-0.114982	0.510938	0.523151	0.497369	0.61069	-1.04133	-1.17408
YDL223C	Hbt1	S(303)	GYSNTDSNsDRDVIPGNFR	1	0.335653	-0.348415	-1.48738	-1.00709	-1.42126	-0.219155	2.26363	1.68346	1.1587	0.881766	-0.849345	-0.990563
YDL223C	Hbt1	S(956);S(959);S(962)	KVsVGsMGsGK	3	0.769323	0.126006	-1.07683	0.00208905	-0.828307	-0.303157	0.576132	0.242506	1.21395	1.12777	-0.654268	-1.19522
YDL223C	Hbt1	S(959);S(962)	KVSVGsMGsGK	2	1.1764	-0.0790186	-1.13589	0.0501485	-1.02185	-0.394186	0.505141	0.42071	1.28973	1.26277	-0.813536	-1.26042
YDL223C	Hbt1	S(962)	KVSVGSMGsGK	1	1.33406	0.719731	-1.0682	0.464225	-1.00512	-0.580944	0.441444	0.68883	1.14394	0.283764	-0.846117	-1.57561
YDL224C	Whi4	T(53)	SNSEtNIKR	1	-0.0615685	-0.115038	-0.233846	0.084073	0.0104559	0.184308	-0.0303894	-0.303203	0.0240013	0.180431	0.291347	-0.0305703
YDL225W	Shs1	S(522)	LNGSSSsINSLQQSTR	1	0.16979	1.09274	0.361068	-0.00984969	0.559359	-0.22837	-0.561554	-0.330279	-0.362738	-0.624892	-0.165925	0.100654
YDL225W	Shs1	S(519)	LNGsSSSINSLQQSTR	1	1.10572	1.92903	0.0312968	-0.462968	0.580101	-0.430062	-0.351254	-0.0187056	-1.07241	-0.896649	-0.293456	-0.120647
YDL225W	Shs1	S(548)	KNDTYTDLASIAsGRD	1	-0.283807	-0.573776	-0.634627	-0.218125	-0.26527	-0.48021	0.17675	0.15346	0.181291	0.155398	0.825664	0.963252
YDL225W	Shs1	S(545);S(548)	KNDTYTDLAsIAsGRD	2	-0.520512	-0.40388	-0.541171	-0.316694	-0.558878	-0.25813	0.421543	-0.0214379	-0.0470433	0.245826	1.24606	0.754317
YDL225W	Shs1	S(521);S(525)	LNGSSsSINsLQQSTR	2	0.40019	1.00194	-0.348436	-0.177509	0.350717	-0.876397	0.0340511	0.347721	-0.526439	-0.777451	0.0899166	0.481696
YDL225W	Shs1	S(521);S(522);S(525)	LNGSSssINsLQQSTR	3	-0.654837	-0.626073	-0.252761	0.427396	-0.244649	-0.278103	0.220574	-0.0281886	0.252727	0.320415	0.678946	0.184554
YDL225W	Shs1	S(408)	ENEYEDNGEHDsAENEQEMSPVR	1	-0.0458135	0.184347	0.21786	0.086335	-0.036499	0.153424	-0.0317711	-0.301108	0.0979166	0.070688	-0.201693	-0.193686
YDL225W	Shs1	S(416)	ENEYEDNGEHDSAENEQEMsPVR	1	-0.0164623	0.00185312	0.456433	0.61852	0.486135	0.643336	-0.369351	-0.615386	-0.319422	-0.275298	-0.237332	-0.373025
YDL225W	Shs1	S(408);S(416)	ENEYEDNGEHDsAENEQEMsPVR	2	0.652565	0.315189	0.036597	0.370735	0.195693	0.256193	0.0849841	-0.241237	-0.492217	-0.147266	-0.477622	-0.553614
YDL226C	Gcs1	S(157)	LSATSQTAASATPGVAQsR	1	0.914935	0.967912	-1.06211	-1.36488	-0.948281	-0.439949	1.971	1.80581	-0.964663	-1.51453	0.0891184	0.545643
YDL226C	Gcs1	S(157);T(161)	LSATSQTAASATPGVAQsREGtPLENR	2	0.545439	0.550937	-0.455034	-0.498485	-0.839527	-0.42377	1.33702	1.15623	-0.449728	-0.853175	-0.138167	0.0682625
YDL231C	Bre4	S(25)	GSYSQTsLR	1	0.176421	-0.422897	0.193542	0.615071	0.141338	0.159956	-0.159465	-0.306579	0.0251288	0.282759	-0.376964	-0.32831
YDL231C	Bre4	T(11)	DRSPtPDLDIVK	1	-0.0757258	-0.0374032	0.0900561	0.0834773	-0.257534	-0.163008	0.0910576	0.324075	0.2249	-0.214403	-0.0727538	0.00726231
YDL231C	Bre4	S(1050)	DQSHSNLNSGGNsMEK	1	0.0631557	0.067424	0.539626	0.998368	0.423661	0.672428	0.0325527	-0.248093	-0.415438	-0.547392	-0.643558	-0.942736
YDL231C	Bre4	S(433);S(435)	EAsAsPQSSGIPTR	2	0.279121	0.111976	0.584253	1.09012	0.402373	0.503386	-0.364535	-0.540426	-0.326741	-0.436285	-0.574471	-0.728774
YDL233W	Mfg1	S(417)	RNsGISPR	1	0.152369	-0.402254	0.239805	2.3901	0.343227	-0.0646632	-0.175615	-0.654403	-0.418971	-0.445486	-0.140815	-0.823289
YDR001C	Nth1	S(83)	RGsEDDTYSSSQGNR	1	-0.58783	-0.773129	0.531537	0.465599	0.448527	0.140632	-0.586578	-0.438912	0.0919775	0.0892524	0.102367	0.516558
YDR002W	Yrb1	S(60)	EGDDAPEsPDIHFEPVVHLEK	1	0.167553	0.540121	-0.0764045	-0.17258	0.392557	-0.678423	0.350493	0.721207	-0.800156	-0.542921	-0.0340426	0.132596
YDR003W	Rcr2	S(161)	IPsESEFDFNLLRPTMNNFVNGQSNR	1	0.929971	1.55429	-0.105688	-0.950754	-0.448175	-0.247088	0.482926	1.22036	0.153162	-0.70488	-1.0122	-0.871922
YDR005C	Maf1	S(90)	RDsNSFWEQK	1	-0.294799	-0.383411	0.191076	-0.187765	-0.28608	0.0194218	-0.370038	-0.557628	0.266681	0.376036	0.49316	0.733346
YDR006C	Sok1	S(258)	KLsSHNQYYR	1	-0.676421	-1.08714	-0.263664	0.113937	0.183552	0.118801	-0.413264	-0.369472	0.857824	0.854293	0.311974	0.369576
YDR006C	Sok1	S(92)	SGDTSTLDGSSQNIIPNRAsMQK	1	-1.00463	-1.18918	-0.845216	-0.833995	-0.472935	-0.440311	0.0472838	-0.0693039	1.07521	1.17452	1.20029	1.35827
YDR017C	Kcs1	S(396)	DDFLsDLDQENNGK	1	-0.486333	-0.32365	0.194727	-0.0140605	0.233119	0.420104	-0.994237	-1.02865	0.628159	0.459244	0.424564	0.487013
YDR017C	Kcs1	S(469)	RsLSSSNQPSLLPEVVLNDNR	1	0.24128	0.295634	0.0519639	-0.186733	0.203716	-0.361298	-0.261384	0.0478355	-0.283368	-0.124974	0.0477917	0.329535
YDR017C	Kcs1	S(471)	SLsSSNQPSLLPEVVLNDNR	1	-0.239326	-0.176255	-0.353454	-0.627947	-0.265043	-0.41022	0.203663	0.505462	0.261287	0.124241	0.392874	0.584719
YDR027C	Vps54	S(31)	IVVPEGSPsR	1	0.41035	0.340977	0.750267	0.696376	0.527015	0.741711	-0.471235	-0.672741	-0.542275	-0.538055	-0.674122	-0.568268
YDR028C	Reg1	S(347)	ESNSsVSLK	1	0.223489	-0.422025	-0.762852	-0.818128	-0.457767	-0.394176	0.237969	0.301144	0.495812	0.964762	0.263349	0.368422
YDR028C	Reg1	S(769)	RTLsLGK	1	-0.551327	-0.881284	-0.269755	-0.110459	-0.140683	0.317531	-0.306372	-0.371126	1.14232	1.22803	0.125818	-0.182691
YDR028C	Reg1	S(773)	sGSTNSLYDLAQPSLSSATPQQK	1	0.292235	1.28218	0.0861384	-0.0531305	0.066519	-1.54505	-0.276946	0.71342	0.257724	-0.840222	-0.425671	0.442802
YDR028C	Reg1	S(242)	DSEGNAQsEEEHDLER	1	-0.0829263	-0.0772677	-0.085254	0.494134	0.179562	0.30391	-0.28494	-0.621078	0.1715	0.0700325	0.102059	-0.169731
YDR028C	Reg1	S(1013)	KSDVKPQENGNDsS	1	0.0995642	0.256492	0.176686	0.136932	0.011518	0.0354952	-0.178961	-0.178034	0.0719482	0.0695182	-0.180755	-0.320403
YDR040C	Ena1	S(1065)	AHNPENDLEsNNKR	1	-0.270384	-0.295447	0.22016	0.279192	-0.135942	0.146761	-0.381418	-0.630725	0.195541	0.179374	0.372044	0.320846
YDR043C	Nrg1	S(163)	NTLsDEEDLEQR	1	1.00262	1.2998	0.757974	0.546808	0.230625	0.57313	-0.231079	-0.557839	-0.288963	-0.144488	-1.47118	-1.71741
YDR054C	Cdc34	S(263)	IEFEDDDDDDDDsIDNDSVMDR	1	-0.883486	-0.169275	1.13469	0.414761	0.699241	1.20987	-1.19885	-0.597936	0.954462	0.391121	-0.706054	-1.24854
YDR060W	Mak21	S(710)	NLLTNTPVDYEYEsDAEEEQR	1	-0.805832	-0.747721	0.533334	-0.290711	0.379112	0.77291	-0.397566	-0.138629	0.568017	0.49902	-0.277064	-0.094869
YDR060W	Mak21	S(878)	ASNFDsDDEMDENEIWSALVK	1	0.738914	1.58352	-0.699587	-2.70356	0.0645616	-0.726345	1.04699	2.1481	-1.45694	-1.7373	0.306059	1.43559
YDR060W	Mak21	S(73)	LIQGLsDDDDAKSEQEFDAVADEDAGDK	1	0.490627	0.865569	0.516255	0.414534	0.705548	0.290097	-0.574448	-0.20645	-0.646636	-0.719039	-0.491347	-0.644711
YDR063W	Aim7	S(137)	LIEVSSGLEDDsDVEELR	1	-0.157877	-0.0123117	0.402542	0.0859066	-0.0936249	-0.0511425	-0.431297	-0.270089	0.217471	0.178444	0.0627865	0.0691924
YDR068W	Dos2	S(27)	ETGsTENTENNELQSR	1	-0.362047	-0.56946	0.0586227	0.523797	0.10855	0.127216	0.282233	0.148173	-0.418328	-0.284357	0.330969	0.0546307
YDR080W	Vps41	S(28)	TIDESNSIsDENNADNKR	1	-0.254995	-0.411655	0.0594478	-0.0135578	0.0870353	0.174783	-0.0291103	-0.0277386	0.0437243	0.205602	0.0938979	0.0725674
YDR083W	Rrp8	S(81)	EQVEDIPsEGSVAK	1	-0.998392	-1.05898	-0.30339	-0.290413	0.0235045	0.41853	0.377041	0.410177	0.837869	1.03413	0.0633676	-0.513441
YDR088C	Slu7	T(212)	DKSQTDETLWDtDEEIELMK	1	0.657021	1.06806	-0.103597	-0.0154276	0.219513	-0.912929	0.142369	0.561159	-0.915067	-0.986851	-0.000238886	0.285993
YDR089W	Ydr089W	S(612)	DRLEEEFDLTGPINNSQGSVDsGRR	1	-0.237954	0.285056	0.139149	-0.617249	0.119697	-0.0438757	-0.273138	0.207478	0.0870931	-0.0646664	0.165152	0.233257
YDR089W	Ydr089W	S(661)	sTTDNEESLLLR	1	-0.514909	-0.600964	0.268801	0.324639	0.0552441	0.381038	-0.181374	-0.242886	0.320233	0.158539	0.052005	-0.0203649
YDR090C	Ydr090C	S(246)	GNTFDEESGQAQKEEPDEKIEQDIsK	1	0.468118	0.251066	0.891143	0.846755	0.779249	1.05376	-1.97952	-2.08021	-0.50972	-0.31107	0.350726	0.239702
YDR093W	Dnf2	S(1593)	ARAsLDLPGINHAETLLSQR	1	0.113818	0.744155	0.144444	0.239433	0.141477	-0.837491	-0.5981	-0.0790238	-0.336995	-0.830928	0.535356	0.763856
YDR093W	Dnf2	S(397);S(404)	MsADFGRPsLDYENLNQTMSQANR	2	-0.0170737	0.391061	0.0608841	-0.531629	-0.0948649	-0.353167	-0.386668	-0.19698	-0.272979	-0.672124	0.710702	1.36284
YDR096W	Gis1	S(351)	GsITDNDNDLFQK	1	-1.05301	-1.08679	-0.476166	-0.774402	-0.227465	0.0647532	-0.408646	0.0818624	1.92948	1.85897	0.235808	-0.144389
YDR096W	Gis1	S(696)	EASKsPISSFVNDYR	1	0.992747	1.37938	0.0098275	0.31802	-0.754463	-1.18551	0.374416	1.0213	-0.0869731	-1.09473	-0.535554	-0.438467
YDR096W	Gis1	S(694);S(696)	EAsKsPISSFVNDYR	2	1.44344	1.77067	-0.296743	-0.36376	-0.857606	-0.926559	0.925802	1.33939	-0.347489	-1.24443	-0.867407	-0.575313
YDR108W	Trs85	S(121)	SNsLFQR	1	-0.677429	-1.02362	-0.254012	-0.155348	0.0787444	-0.017201	-0.185251	-0.226741	0.15375	0.340841	0.884198	1.08206
YDR119W	Vba4	S(106)	IDDSPQDEVNsIK	1	-0.205214	-0.465021	-0.16126	-0.564232	-0.475197	-0.312552	0.160302	0.33421	0.736792	0.993311	-0.0554234	0.0142828
YDR119W	Vba4	S(99);S(106)	IDDsPQDEVNsIK	2	-0.533605	-0.922152	-0.612678	-0.581321	-0.744696	-0.542787	0.442237	0.444487	0.790481	1.02005	0.658261	0.581724
YDR121W	Dpb4	S(183)	TEsQDVETR	1	-0.109879	-0.335604	0.600256	0.68493	0.510729	0.722413	0.061309	-0.137616	-0.62911	-0.377762	-0.433305	-0.556362
YDR122W	Kin1	S(521)	QsHENIEK	1	-0.12016	0.0218383	0.166869	-0.0172331	-0.0739304	0.0177693	0.294554	0.414624	0.257789	0.266715	-0.525121	-0.703713
YDR122W	Kin1	S(764)	FEGsDDDENHPLPPLNVAK	1	0.435791	0.586501	0.0679548	-0.0315078	-0.0672752	-0.39445	-0.212989	-0.0214302	-0.0436372	-0.301187	-0.179844	0.162075
YDR130C	Fin1	S(88)	ETQsLDRPQFK	1	-0.0280655	-0.169009	0.370332	0.212941	0.213079	0.268095	0.0497669	-0.0193349	-0.307438	0.0701791	-0.297675	-0.362871
YDR135C	Ycf1	S(908);T(911);S(914)	RAsDAtLGsIDFGDDENIAK	3	-0.45395	-0.933406	-0.270981	-0.2945	-0.0873265	0.548083	0.317944	0.158379	0.0858263	0.2942	0.408488	0.227245
YDR135C	Ycf1	S(869)	SNEFGDsSESSVR	1	0.21258	0.27107	0.620522	0.714683	0.470177	0.770606	-0.739567	-0.779145	0.254771	-0.0967248	-0.818482	-0.880488
YDR135C	Ycf1	S(878)	ESsIPVEGELEQLQK	1	0.72283	1.14073	0.359424	0.183326	0.027355	-0.582562	-0.685246	0.0291285	0.159503	-0.684679	-0.583866	-0.0859451
YDR135C	Ycf1	S(903)	LHDLDFGNSDAIsLR	1	-0.25114	-0.277638	-0.112888	0.00818064	-0.0580693	-0.00371801	0.129247	0.0696588	-0.0839649	-0.00205132	0.376815	0.205568
YDR138W	Hpr1	S(684)	INSASQTEGDELKsEQTQPK	1	0.0709277	0.30104	0.0976001	0.208492	0.704189	0.494849	-0.648613	-0.957769	-0.279825	-0.278292	0.0557214	0.23168
YDR141C	Dop1	T(246)	MEAEENPSEtETNDSHLDR	1	-0.277355	-0.44498	-0.219253	0.295022	0.0299448	-0.115897	0.00261786	0.0020256	0.165871	0.461951	0.298174	-0.198122
YDR158W	Hom2	S(318)	NRDsGYGVSVGR	1	-0.424007	-0.286103	0.345138	0.288077	0.166644	0.556893	-0.129034	-0.531052	0.251467	0.185109	-0.210208	-0.212924
YDR162C	Nbp2	S(102)	RQsITLPDDYIVNQR	1	-0.109126	0.0565267	-0.539356	-0.102522	-0.503186	-0.399043	1.45626	0.403408	-0.257219	-0.443592	-0.0473692	0.485222
YDR162C	Nbp2	S(235)	TKLDIsD	1	0.311231	0.279324	-0.0846645	-0.39686	-0.0791489	0.0532806	-0.0146907	-0.164993	-0.289367	-0.0392979	0.15664	0.268547
YDR165W	Trm82	S(66)	EQQGQsSENENENKK	1	-0.30694	-0.306456	-0.081426	-0.0091213	0.128843	0.315171	-0.270158	0.0838738	0.263893	-0.0478753	0.265789	-0.0355919
YDR165W	Trm82	S(66);S(67)	EQQGQssENENENKK	2	-0.291964	-0.210318	-0.192276	0.273594	0.198058	0.518106	-0.295157	-0.551252	0.19122	-0.00687569	0.390119	-0.0232547
YDR167W	Taf10	S(58)	EAVVDDGsENAFGIPEFTR	1	-0.512392	-0.498856	-0.425666	-0.596043	-0.434213	-0.442824	0.420864	0.684209	0.42249	0.519773	0.528917	0.33374
YDR168W	Cdc37	S(484)	AILENEKDFQSLKDQYEQDHEDATMENLsLNDR	1	0.252685	-0.082499	-0.374592	-0.288135	-1.45439	-0.320808	1.11552	0.759023	-0.316352	-0.443763	0.777127	0.376182
YDR168W	Cdc37	S(14);S(17)	IELsDDsDVEVHPNVDK	2	-0.0242445	0.105675	-0.0234996	-0.059161	0.145226	-0.000351845	-0.359844	-0.224698	0.111568	-0.0180088	0.150794	0.196544
YDR169C	Stb3	T(340)	LTATSEPtSR	1	-0.112241	-0.307911	-0.361335	-0.143817	-0.211596	-0.0799119	-0.346303	-0.56983	0.506117	0.601452	0.525358	0.500017
YDR170C	Sec7	S(1752)	AHQEEsSEDVGGDMVETLNGQTK	1	-0.580169	-0.878645	-0.241928	-0.17556	-0.714237	0.0599005	1.59694	1.62184	0.367339	-0.11735	-0.427948	-0.510183
YDR170C	Sec7	T(1240)	KAtPTELAQEK	1	-0.169191	-0.279482	-0.186786	-0.569883	-0.57789	-0.0730924	1.13219	1.45392	0.178032	0.466353	-0.376359	-0.997814
YDR170C	Sec7	S(1804)	NEsNEDIR	1	-0.415932	-0.289773	0.233113	0.415892	0.237629	0.508177	0.00622547	-0.301444	0.102571	0.147239	-0.163606	-0.480089
YDR170C	Sec7	T(819)	SLSSQNIDADDPtQFENLK	1	-0.193276	-0.258243	-0.102094	-0.777974	-0.241441	-0.159896	1.59097	2.14571	-0.0987215	0.264125	-0.955436	-1.21372
YDR170C	Sec7	T(83)	ETSNDATNGMKTPEETEDtNDK	1	-0.775438	-0.474553	-0.0292702	-0.410854	-0.580508	-0.371353	0.333053	0.481786	1.16571	1.17289	-0.113549	-0.397918
YDR170C	Sec7	T(71)	ETSNDAtNGMKTPEETEDTNDKR	1	-0.572748	-0.355029	0.211631	-0.035834	-0.291057	0.048242	0.1339	0.368857	0.857699	0.848892	-0.339425	-0.875128
YDR170C	Sec7	S(780)	SsLSNDVR	1	0.281269	0.0638495	0.145149	0.531794	0.121462	0.262554	-0.589434	-0.937837	0.261619	0.32778	-0.220065	-0.248141
YDR170C	Sec7	S(1220)	VsYESSR	1	0.100945	0.0624441	0.503085	0.522739	0.311846	0.43622	-0.856506	-1.05077	0.46552	0.373589	-0.52489	-0.34422
YDR171W	Hsp42	S(232)	SSSFAHLQAPSPIPDPLQVsKPETR	1	0.343129	0.527257	-0.391096	-0.237901	-0.510777	-0.994902	0.669326	1.20516	-0.0918839	-0.480711	-0.0186978	-0.0189046
YDR171W	Hsp42	S(213);S(214);S(215)	KsssFAHLQAPSPIPDPLQVSKPETR	3	-0.0258817	-0.111134	-0.976843	-0.741092	-0.723552	-0.467242	2.03543	1.91629	-0.289116	-0.61536	-0.0200395	0.0185382
YDR174W	Hmo1	S(153)	WKELsDNEKEK	1	-0.196863	-0.342636	-0.0278872	-0.14838	0.058965	0.170446	-0.347739	-0.36928	0.19704	0.329953	0.316484	0.359897
YDR186C	Ydr186C	T(844)	YSNSNStVTKPVYK	1	-0.45769	-0.760738	-0.669734	-0.718583	-0.323255	-0.279004	0.0179996	-0.0923969	0.624437	1.00073	0.808243	0.849996
YDR186C	Ydr186C	S(526)	SGSSTDVLSSGIDsMAK	1	0.0478045	0.601081	-0.336994	-1.05222	0.348341	-0.727769	-0.270307	0.231843	-0.721259	-0.653887	0.932414	1.60095
YDR186C	Ydr186C	S(674);S(684)	FLNsPIPQHTQQAsPLLMR	2	0.17971	0.246821	-0.25234	-0.734515	0.0672716	-0.370706	0.00311528	0.221858	-0.31081	-0.0668633	0.313053	0.703405
YDR186C	Ydr186C	S(694)	NNSNsNLLFEK	1	-0.410155	-0.149766	0.0994095	-0.321378	0.331478	0.150094	-0.512652	-0.599761	0.167544	0.273797	0.324375	0.647015
YDR201W	Spc19	S(116)	KNISMDDDDALNsPDMGQEYEGR	1	0.4157	0.380002	-0.0393145	-0.0335979	0.0462585	0.144755	-0.342306	-0.498239	-0.0836186	0.0461635	0.00328016	-0.0390844
YDR207C	Ume6	S(59)	HAEDEVsDGANSR	1	-0.302373	-0.173823	0.196226	0.165825	0.0860829	0.12168	0.810989	0.925318	-0.329958	-0.150805	-0.460966	-0.888195
YDR207C	Ume6	S(645)	RLsAPEQQQQLEVPPLKK	1	-0.157338	-0.392627	0.0580894	-0.213269	0.201022	0.0525278	-0.114956	0.0770927	0.135061	0.354603	-0.121877	0.121672
YDR207C	Ume6	S(229)	IHLPPPQAPAVSsPGTTAAGSGAGTGSGIR	1	0.211713	0.200177	-0.207376	0.0225671	0.130345	-0.0932481	-0.280951	0.149254	-0.226671	-0.137886	0.37294	-0.140865
YDR208W	Mss4	S(662)	AKEDDLQLADTAsIEEQPQTQGPIR	1	0.141575	0.124983	-0.137061	-0.292077	-0.364906	-0.30225	-0.111655	0.310207	0.260122	0.408378	0.211924	-0.249241
YDR213W	Upc2	S(524)	NSNISPSTPsAVLNDR	1	-0.276755	-0.272041	-0.0641267	-0.749983	-0.317338	-0.228662	-0.154402	-0.342392	0.111832	0.4153	0.700789	1.17778
YDR216W	Adr1	T(305)	SDSSGStMNLDYK	1	0.638178	1.17013	0.640414	0.394365	0.512681	-0.270456	-0.827754	-0.138509	0.34899	-0.17568	-1.31251	-0.979846
YDR217C	Rad9	S(26)	EALHsPLADGDMNEMNVPVDPLENK	1	0.357262	0.532271	0.00769979	-0.0853985	0.262195	-0.583447	-0.0474678	0.539636	-0.731145	-0.575878	0.151456	0.172816
YDR226W	Adk1	S(140)	LIHPAsGR	1	-0.686482	-0.457866	-0.14509	0.673874	-0.313274	-0.451117	0.428503	0.39305	1.12837	0.878723	-0.412022	-1.03666
YDR229W	Ivy1	S(32)	VDWDNGNHFDVsPDR	1	-0.467386	-0.326044	0.344208	0.127542	0.0746136	0.273084	0.290377	0.227592	0.179384	0.302226	-0.421196	-0.6044
YDR233C	Rtn1	S(190)	QKTQEFsQMACEK	1	-1.11993	-0.3285	-0.240867	-0.233618	-0.733942	-0.011885	1.83007	1.85655	0.370293	-1.57202	-0.105623	0.289477
YDR239C	Ydr239C	T(663)	EGtDAEQAEDYLKDIPGDEAYNSDDIMAPLR	1	0.814347	0.395771	-0.267868	-0.354652	-0.197799	-0.335059	-0.0178491	-0.208117	-0.677058	-0.0129547	0.346227	0.515012
YDR239C	Ydr239C	T(724)	SGtLDNDYVNR	1	-0.0126287	-0.179686	-0.0383459	0.254263	0.0796721	0.0746004	-0.422443	-0.707449	-0.229216	0.0278241	0.622961	0.530446
YDR239C	Ydr239C	S(683)	DIPGDEAYNsDDIMAPLR	1	-0.0571414	0.130392	0.173163	-0.120289	0.0456006	-0.0380624	-0.423328	-0.317345	0.157718	0.110612	0.103989	0.234692
YDR251W	Pam1	T(479)	QSFFNSTSDtTLSR	1	-0.525689	-0.439765	-0.110056	-0.593837	-0.270864	-0.144312	-0.146294	-0.224137	0.252517	0.317482	0.800386	1.08457
YDR251W	Pam1	S(661)	LNSLsNQSTFR	1	-0.333616	-0.495124	0.0746169	0.532258	0.0206928	-0.418716	-0.729376	-0.715193	0.0659417	-0.189451	0.90174	1.28623
YDR251W	Pam1	S(471)	RQsFFNSTSDTTLSR	1	-0.596362	-0.52723	-0.194987	-0.0121164	-0.0457276	-0.10726	0.0559066	0.108738	0.144412	-0.343167	0.636758	0.881034
YDR264C	Akr1	S(51)	sGNEEESGNEQVNHNDEAEEDPLLTR	1	-0.115274	-0.358201	0.400171	0.254428	0.363134	0.783455	-0.676958	-0.708863	0.216658	0.293543	-0.187732	-0.264363
YDR264C	Akr1	S(57)	AIRSGNEEEsGNEQVNHNDEAEEDPLLTR	1	-0.109927	-0.0159107	-0.651968	-0.0981328	0.293707	-0.157664	0.237329	-0.0430762	-0.0437457	-0.02046	0.274604	0.335243
YDR266C	Hel2	S(556);S(564)	KGsSSTSLNNsK	2	-0.203876	-0.310781	-0.391486	0.109515	-0.0178722	0.0169651	0.911779	0.556013	-0.066885	0.0324705	-0.23166	-0.404183
YDR266C	Hel2	S(564)	KGSSSTSLNNsK	1	-0.185765	-0.37965	0.580334	0.241733	0.440189	0.42212	0.261823	0.177499	-0.0678304	0.291762	-1.02875	-0.753465
YDR266C	Hel2	S(345)	ERDDYDLPSIsSLPGSSSGSR	1	0.186225	0.443035	0.117396	-0.395458	-0.188976	-0.305238	0.225407	0.2271	-0.178571	0.0545357	-0.161481	-0.0239755
YDR283C	Gcn2	S(571)	TLSQsSIR	1	-0.0259584	0.109593	0.188352	0.174047	0.0557936	0.0267666	-0.393493	-0.403885	0.172121	0.024327	0.00318514	0.0691517
YDR284C	Dpp1	S(285)	IPDEELHPLsDEGM	1	0.226527	0.331707	0.0501798	0.0905342	0.0375778	-0.0687709	-0.0873491	0.00242451	-0.046684	-0.0480658	-0.180251	-0.307829
YDR293C	Ssd1	S(286)	NQSQQPQQQLsPFR	1	-1.13611	-0.960983	0.653308	-0.0787941	0.244743	0.529821	-0.25732	-0.13963	0.66998	0.802232	-0.174603	-0.152646
YDR293C	Ssd1	S(40)	sQSELTNLMIEQFTLQK	1	0.462063	0.449239	-1.16098	-0.588455	-0.206131	-0.638065	-0.236528	0.535724	-0.157764	-1.01859	1.29934	1.26015
YDR293C	Ssd1	S(164)	RHsLGLNEAK	1	-0.47715	-0.427925	-0.140409	-0.120713	0.0376812	-0.0688708	-0.299165	-0.166813	0.477272	0.360613	0.401771	0.423709
YDR299W	Bfr2	S(383)	DSVDDNENsDDGLDIPK	1	-0.0394549	-0.384988	-0.0428629	-0.262924	0.283061	0.439976	-0.194464	0.150645	0.102043	0.338752	-0.108322	-0.281461
YDR302W	Gpi11	S(16)	TVsFSDDTTLTTHQNR	1	-0.000115297	-0.0884011	-0.0471428	0.342665	-0.275579	0.194799	0.265251	0.237362	0.261538	-0.30744	-0.203952	-0.378984
YDR303C	Rsc3	T(241)	KLSEDGVtDGDGKPIPESER	1	-0.0291916	-0.372398	-0.00996014	0.0891413	-0.0201749	0.492946	-0.160954	-0.461442	0.0490322	0.166168	0.171248	0.0855842
YDR310C	Sum1	S(379)	FHQIPSsPSNPVSQPAPVR	1	-0.256922	-0.0761636	0.179666	0.269009	0.154686	0.0639078	-0.440926	-0.25412	0.289235	-0.189299	0.0742608	0.186666
YDR310C	Sum1	S(613)	GsSLSPKPR	1	-0.247071	-0.526723	0.206419	0.24607	0.191825	0.494988	-0.261689	-0.101442	-0.0332134	-0.0114719	0.14373	-0.10142
YDR310C	Sum1	S(628)	SASISGIsDHQQEGYQPSEQEK	1	-0.209037	-0.408449	-0.0722131	-0.327781	0.123984	-0.207589	-0.142856	0.372282	0.0684736	0.242883	0.231648	0.328654
YDR320C	Swa2	S(264)	THDKVEDYDLPQVNDsPDR	1	-0.234732	-0.0144552	0.431924	0.373905	0.300083	0.763148	-0.257553	-0.348786	0.14434	-0.0929487	-0.384063	-0.680864
YDR320C	Swa2	S(311);S(312)	TVPDVSHSssPTSGILIEENSR	2	-0.0370657	0.238597	0.0191583	-0.00368715	-0.127629	-0.254063	0.0752852	0.225497	0.202071	0.136044	-0.13182	-0.342388
YDR333C	Rqc1	S(119)	DKGsDDDDDDEEFDK	1	-0.15868	0.314023	0.182387	-0.49819	0.205711	-0.100867	-0.188706	0.335666	0.0778737	-0.396163	-0.118586	0.345532
YDR333C	Rqc1	S(166);S(167)	TKNDDTNEEGFFTASEPEEAssQPWK	2	0.247484	0.659894	0.206687	-0.0475828	0.585119	0.315983	-1.84201	-1.34203	0.108999	-0.0531323	0.693719	0.466866
YDR338C	Ydr338C	S(113)	VSETPELsPQDVDWILHEHER	1	0.298711	0.993762	0.327236	-0.050736	-0.265716	-0.711033	-0.251118	0.109761	-0.104074	-0.854657	-0.00503916	0.512903
YDR342C	Hxt7	S(544)	SASWVPPsRR	1	-0.117028	-0.328818	0.072313	0.777653	0.291226	0.347388	-0.392381	-0.642548	0.017385	-0.235933	0.128484	0.0822577
YDR348C	Pal1	S(197)	EHSNsGTYIPR	1	-0.64312	-0.652729	0.385559	0.832593	0.389751	0.514559	-0.412397	-0.502557	-0.0344747	-0.279266	0.314683	0.0874008
YDR348C	Pal1	S(61);S(64)	TSsQLsFPNIPEDEPQR	2	0.118027	-0.0660979	-0.0728386	-0.130399	0.0202808	0.0698213	0.204547	0.00412633	-0.0109108	-0.0210312	-0.259104	0.143581
YDR351W	Sbe2	S(532)	NIDLAsMEELQK	1	0.269382	0.141022	-0.423793	-0.305947	-0.12195	-0.325525	0.554895	0.368127	-0.0381382	0.230021	-0.240395	-0.107698
YDR352W	Ypq2	S(136)	LATVGHEPKPLLPELVENGELLREEEDMIQGGSSAEsPR	1	-0.5511	0.194271	0.619444	-0.317607	0.244711	-0.0415674	-0.310295	-0.0506175	-0.0546571	-0.100248	0.0518969	0.315769
YDR356W	Spc110	S(91)	ANIPPsPR	1	-0.0127393	-0.136245	0.1747	0.662677	0.143816	0.299911	0.0143778	-0.266523	-0.106989	-0.168152	-0.213165	-0.391669
YDR356W	Spc110	S(60)	sIDDTIDSTR	1	-0.205341	-0.440196	0.256405	0.213866	0.220675	0.399252	-0.359129	-0.384002	0.0970224	0.208465	-0.00963274	0.00261507
YDR359C	Eaf1	S(841)	AQsPIPSNGK	1	0.280742	0.265362	-0.137298	-0.380241	-0.122192	-0.0972547	-0.100838	0.108703	0.0442032	0.048023	0.0353815	0.0554077
YDR361C	Bcp1	T(205)	KYEVNFDtDDDTDSGKR	1	-0.842304	-0.610951	-0.115622	-0.311999	-0.139454	-0.129416	-0.040659	0.212068	0.712492	0.485916	0.425546	0.354381
YDR365C	Esf1	S(86)	EAENDEDsEVNAK	1	-1.23187	-1.43127	-0.217822	-0.553267	0.0873014	0.195327	0.468144	0.720504	0.768898	0.989166	0.125351	0.0795398
YDR365C	Esf1	T(220);S(225)	KKtDDSDsDMDIGIK	2	-0.306342	-0.634767	0.0258089	0.118786	0.158573	0.153234	-0.139543	0.028519	0.259161	0.521431	0.00234151	-0.187203
YDR379W	Rga2	T(589)	SSSLQtSR	1	-0.316031	-0.287949	0.392615	0.309797	0.32921	0.508324	-0.84456	-1.0542	-0.114096	-0.245865	0.552862	0.769892
YDR379W	Rga2	S(763);S(770);S(772)	AHDELPsPGKVPLsPsPK	3	0.736358	0.337372	0.129241	-0.0179954	-0.00233461	0.053328	-0.67935	-0.625998	-0.191967	0.109911	0.00805284	0.143383
YDR379W	Rga2	S(702)	KGsISNASPKPR	1	-0.775069	-0.0965185	-0.521328	0.07271	-0.32069	0.303738	0.0726415	-0.627269	0.470685	0.0697231	1.07376	0.277617
YDR379W	Rga2	S(677)	QSASSREsLEQK	1	-0.254172	-0.0177281	0.162502	0.541743	-0.0114058	0.221821	-0.37833	-0.819257	0.431366	0.125729	0.0500385	-0.0523075
YDR381W	Yra1	Y(222)	SLEDLDKEMADyFEK	1	-0.281515	-0.116709	-0.62383	-0.829193	-0.317188	-0.427496	1.5082	1.67037	0.307571	0.294793	-0.593241	-0.591768
YDR382W	Rpp2B	S(100)	EEEAKEEsDDDMGFGLFD	1	-0.532762	-0.0886515	0.320861	-0.410001	0.527329	0.706031	-0.924363	0.0310973	1.32571	0.476864	-0.716779	-0.715339
YDR389W	Sac7	S(18)	IENVSPsK	1	-0.397149	-0.490222	0.557492	0.34606	0.349159	0.612726	-0.372178	-0.307604	0.0833322	0.34649	-0.220656	-0.50745
YDR389W	Sac7	S(632)	SNALPLTEDDGDERNsR	1	-0.444272	-0.583378	-0.16852	0.120932	-0.246996	0.103147	0.502728	0.155912	0.414903	0.418414	-0.0578443	-0.215027
YDR389W	Sac7	S(46);T(48)	SMSSENITVPRsPtSLSR	2	0.276528	0.483747	-0.311709	0.125157	-0.15582	-0.164388	0.155958	-0.0768676	-0.279752	-0.370175	0.314795	0.00252611
YDR389W	Sac7	S(37)	SMsSENITVPR	1	0.103028	-0.106536	0.177819	0.13313	0.0574276	0.0579171	-0.0518463	-0.015996	-0.0447952	0.151715	-0.241633	-0.22023
YDR407C	Trs120	S(374);T(375)	ATASTTASstPR	2	0.196308	0.661142	0.737211	1.20358	0.857842	0.410937	-0.933773	-0.768757	-0.221361	-0.853531	-0.636229	-0.653372
YDR422C	Sip1	T(665)	GVERPStPFSDYR	1	-0.208805	-0.199593	0.296719	0.0736035	-0.0827834	0.0918781	0.214371	0.313856	0.196543	0.232138	-0.416044	-0.511884
YDR422C	Sip1	S(678)	SSsINMR	1	-0.0416526	-0.268202	0.148675	0.350726	0.115145	0.170557	-0.422336	-0.216764	0.311828	0.29554	-0.11166	-0.331857
YDR422C	Sip1	S(379)	GNAGGsNDDFTAPISATAK	1	0.470696	0.708214	-0.131244	-0.670952	0.23794	-0.115862	0.985279	1.52174	-1.44983	-1.78801	-0.112838	0.344867
YDR422C	Sip1	S(348)	VNSsNSMYTAER	1	0.699523	0.681022	-0.245109	0.0835311	0.116674	-0.291068	0.317479	0.619612	-1.03713	-1.22891	0.148558	0.135809
YDR422C	Sip1	T(536);S(545)	ELtLDENASLDsEKQLNPR	2	0.206062	-0.0751464	-0.419997	-0.267575	-0.376257	-0.410961	0.237207	0.310287	0.0922465	0.304283	0.260739	0.139112
YDR422C	Sip1	S(691);S(692)	LKAssLDLMAEVKPER	2	-0.585103	-0.855073	-0.772343	-1.05796	-0.959646	-0.37001	1.89288	1.78303	0.0703198	0.300476	0.353894	0.199543
YDR432W	Npl3	S(224)	ENsLETTFSSVNTR	1	0.142432	0.731622	-0.141922	-0.436187	-0.0527662	-0.470735	0.0497796	0.369139	-0.492567	-0.889684	0.495045	0.695845
YDR436W	Ppz2	S(188)	INTSSsADR	1	0.0401054	-0.239082	-0.0212956	-0.00822863	-0.0990171	-0.0399684	-0.300517	-0.425196	0.413104	0.750724	-0.0323793	-0.038248
YDR436W	Ppz2	S(111)	RLsSSSR	1	-0.745386	-0.788025	-0.0982769	0.021251	0.0966958	-0.012615	-0.361113	-0.162618	0.97147	0.92856	0.136611	0.0134481
YDR436W	Ppz2	S(317)	GTSPIPNLNIDKPSPSASSAsK	1	0.773524	1.28985	0.0238363	-0.0586321	-0.851217	-1.4697	-0.539263	-0.108966	0.788335	-0.0070822	-0.195216	0.354523
YDR436W	Ppz2	S(224)	RRsDNTLPASYPLNAEAGGSGSDYFSNR	1	0.133075	0.577672	-0.321005	-0.304644	-0.16482	-0.391364	-0.351527	-0.069242	0.551906	-0.117737	0.152371	0.305316
YDR444W	Ydr444W	S(507)	GQTNEANSDsDNEQGVFLDGQK	1	0.546405	0.744715	0.960565	0.9616	0.498886	0.561094	-1.04961	-0.675749	-0.561707	-0.954992	-0.394543	-0.636669
YDR450W / YML026C	Rps18A / Rps18B	S(43)	RYsNLVCK	1	-1.53542	-1.31434	-0.732046	-0.489843	-0.788162	-0.255486	1.68568	1.38119	1.90915	1.55645	-0.539201	-0.877979
YDR456W	Nhx1	T(498);S(499)	TGCISEEDtsDDEFDIEAPR	2	-0.0352873	-0.0991173	0.398526	-0.0393117	0.333091	0.539964	-0.167734	-0.592168	0.0285181	0.119385	-0.557113	0.0712482
YDR456W	Nhx1	S(499)	TGCISEEDTsDDEFDIEAPR	1	0.284423	0.434969	1.1382	0.401939	0.593807	0.69769	-0.902005	-0.891509	-0.0387028	-0.0833042	-1.07572	-0.559785
YDR457W	Tom1	S(2376)	EIDsDFLEAIPEDIR	1	-0.443843	-0.265613	-0.754569	-1.73783	-0.217664	0.00941441	0.610431	0.861943	0.646547	0.783343	0.159098	0.348745
YDR457W	Tom1	S(1890)	IEDHDEVEDEVDEsDKEEIPDMFK	1	0.131081	0.136409	-0.0213218	-0.22751	0.0283452	0.123473	-0.0440823	-0.0767765	-0.0450796	0.191317	-0.0489426	-0.146912
YDR457W	Tom1	S(2418)	ADDDVsNNDEEVENGLDHGNSNDR	1	-0.331971	-0.538305	0.13063	0.490263	-0.1025	-0.0465184	0.144486	0.160131	0.190544	0.257993	-0.0311897	-0.323563
YDR458C	Heh2	T(152)	AtSADLTSELETVEELHKK	1	0.95708	1.37908	-0.0776072	0.252104	-0.565645	-0.996626	-0.249575	-0.013478	0.0754508	-0.325375	-0.139703	-0.295709
YDR458C	Heh2	S(141)	ANKPPEsPPK	1	0.238664	0.00612382	0.257369	0.294634	0.123285	0.163349	-0.12572	-0.229149	-0.274496	0.00487234	-0.219102	-0.23983
YDR464W	Spp41	T(1024)	AESVEPVENNVEtAK	1	0.201029	0.0275233	-0.0454439	0.21505	-0.0246668	0.1569	-0.0707871	-0.138445	0.137421	0.332912	-0.197552	-0.59394
YDR466W	Pkh3	S(683)	ASSEPsSPPPISR	1	0.394909	0.307706	0.399581	0.744789	0.0593606	0.520915	-0.429626	-0.71147	-0.201769	-0.373762	-0.222456	-0.488179
YDR466W	Pkh3	T(832);S(834)	QPtPsPPLPQMEFPTTR	2	0.467585	0.606127	0.406819	0.107144	-0.0556705	-0.0757613	-0.392152	-0.17149	0.0761009	0.0102171	-0.502682	-0.476237
YDR475C	Jip4	S(552)	EEAsDDEFNAFKDDENDVMSVK	1	0.521657	2.05147	1.31583	0.741816	0.536682	-1.34944	-2.10561	-1.23402	-0.0377545	-1.15072	-0.23081	0.940903
YDR475C	Jip4	S(366)	ALSLGPEEsDNK	1	-0.603112	-0.494302	-0.0459668	-0.269694	-0.496441	-0.143912	0.0882064	0.189537	0.760285	0.508447	0.297028	0.209924
YDR497C	Itr1	S(55)	APAsDDEDR	1	-0.00551434	0.211411	0.897156	0.772664	0.824598	1.11985	-1.52157	-1.97383	-0.771004	-0.699165	0.576333	0.569073
YDR505C	Psp1	S(520)	KGsFTTELSCR	1	-0.325636	-0.375646	-0.133785	-0.614225	0.49146	0.143864	-0.107364	0.357663	0.586449	0.701149	-0.511125	-0.212806
YDR505C	Psp1	T(334)	RNtQPVASFNPSLPTFQQQQQQPQQPQQPR	1	-0.410635	-0.325455	-0.293912	-0.601626	-1.14267	-0.431273	0.266342	0.84805	0.891141	-0.753329	0.68973	1.26363
YDR507C	Gin4	S(930)	KQNsQEGDEAHPK	1	-0.0185985	-0.10751	0.520581	0.490731	0.508975	0.699908	0.0193968	-0.0422959	-0.383429	-0.20566	-0.646925	-0.835172
YDR507C	Gin4	S(471)	RAsVINVEK	1	-0.849256	-1.15393	-0.492858	-0.177935	0.591001	0.175221	-0.0338417	0.161819	0.272652	0.683604	0.512302	0.31122
YDR507C	Gin4	S(384)	QSIsSVSVSPSKK	1	0.342269	1.22176	0.824922	-0.234731	0.749119	-0.593392	-0.0611941	0.617183	-0.921986	-0.811355	-0.93313	-0.199464
YDR507C	Gin4	S(744)	MEYPSIIAPQRLsEER	1	0.350838	0.702843	0.314266	0.30871	0.723578	-0.312769	0.0346214	0.238353	-0.869542	-0.432251	-0.553762	-0.504887
YDR508C	Gnp1	Y(54)	EKEIGSIEPENEVEyFEK	1	1.53089	2.01827	-0.0370239	0.37326	0.212989	-0.309338	-0.938719	-1.49803	-0.954727	-0.972781	0.186592	0.388619
YDR515W	Slf1	S(45)	SSSPDsNTVIPVEELR	1	0.627058	0.699611	-0.0683504	-0.204458	-0.899254	-0.541664	-0.164093	-0.306407	0.426601	0.317503	0.0780385	0.0354163
YDR517W	Grh1	S(155)	ESDDLDDVsLNHDER	1	-0.540404	-0.84097	-0.474099	-0.308822	-0.543762	-0.265526	0.817788	0.604829	0.219673	0.434925	0.520804	0.375564
YEL013W	Vac8	S(16)	DSSDEAsVSPIADNER	1	-0.627673	-1.10488	-0.490748	-0.456344	-0.559953	0.110691	0.927054	0.594484	0.0438123	0.406568	0.707509	0.44948
YEL015W	Edc3	S(257)	LGQMIISQsR	1	-0.673611	-0.940822	-0.520232	-0.863616	-0.439622	-0.739079	0.565564	0.677854	0.27169	0.485197	0.796212	1.38047
YEL017W	Gtt3	S(116)	EDDDEKPQsDDETSATKPLSSR	1	0.356506	0.753309	0.529923	-0.226	-0.306256	-0.0380793	-1.05439	-0.577566	0.971612	0.225042	-0.497395	-0.136706
YEL022W	Gea2	S(296)	VNNEEAISEDDGIEEEHIHsEK	1	-0.241285	-0.158821	0.195776	0.205771	0.142037	0.0401857	-0.0270832	0.0443426	-0.0256589	-0.0496597	-0.043785	-0.0818184
YEL032W	Mcm3	S(781)	QPASNSGsPIK	1	-0.0562303	0.0281179	1.26653	1.26792	0.71187	1.16289	-0.307186	-0.427791	-0.458959	-0.511389	-1.15603	-1.51975
YEL032W	Mcm3	S(794)	STASsVNATPSSAR	1	-0.187523	-0.239794	0.402461	0.502153	0.449444	0.47462	0.0701322	0.174164	-0.400869	-0.362513	-0.333645	-0.548629
YEL034W	Hyp2	S(2)	MsDEEHTFETADAGSSATYPMQCSALR	1	1.07856	0.912977	-0.68452	-0.438125	-0.865513	-0.491058	1.40822	0.793467	-0.485404	-0.485454	-0.451347	-0.291807
YEL043W	Yel043W	S(802)	ISSDFNLLVPNLsPR	1	0.69499	0.703516	-0.0163039	-0.0811317	-0.438232	-0.510421	-0.487001	-0.51881	-0.125157	-0.196352	0.371704	0.603199
YEL043W	Yel043W	S(932)	SASSPATADTDIQDSSTPSTSPsGR	1	0.34235	0.843249	0.802869	0.664538	0.64288	0.66759	-1.35635	-1.55671	-0.049607	-0.318284	-0.382141	-0.300379
YEL046C	Gly1	S(369)	SEsTEVDVDGNAIR	1	0.283395	0.37014	0.492807	0.859335	1.24463	0.839993	-1.10469	-1.67694	-0.919331	-0.758476	0.00318751	0.365947
YEL055C	Pol5	S(789);S(800)	ALNLPDNIVNDKGEVDLDQLEGLsDDGGDDEDEEsMDDEK	2	-0.372285	-0.0104246	-0.512824	-0.210342	0.447726	0.213728	-0.138346	-0.0165368	0.372757	0.40265	0.202973	-0.379074
YEL060C	Prb1	T(50)	KVEFtKDDDEEPSDSEDKEHGK	1	0.143154	0.372203	0.199863	-0.124414	-0.0745657	0.0347507	-0.155068	-0.463604	-0.131306	0.102279	0.0179219	0.0787845
YEL063C	Can1	S(38)	RGsIPLKDEK	1	-0.294734	-0.3413	0.574376	0.591857	0.904671	1.03719	-0.479651	-0.553726	-0.437345	-0.311631	-0.267317	-0.422393
YER016W	Bim1	S(149)	SSsTGTGSAMSGGLTTR	1	0.102727	0.332424	0.363843	0.390248	0.323035	0.222148	-0.143029	-0.257042	-0.353887	-0.567936	-0.292691	-0.119841
YER020W	Gpa2	S(61)	QQQPsPHNVK	1	0.152386	0.119913	0.271138	0.689935	-0.0544237	0.0625124	-0.306946	-0.490822	-0.0410991	-0.108089	-0.0210545	-0.273449
YER024W	Yat2	S(787)	KTSSsSQVNLNR	1	1.14606	1.06517	-0.264474	0.268034	0.194322	0.095461	-0.730337	-0.927281	-0.295058	-0.429767	-0.0505161	-0.0716221
YER024W	Yat2	T(813);S(815)	NISKtPsMK	2	0.0606772	-0.0775321	-0.620604	-0.338993	0.00151879	-0.084087	-0.665375	-0.716366	0.229135	0.357958	0.994649	0.859019
YER024W	Yat2	S(788)	TSSSsQVNLNR	1	0.933341	1.39082	-0.0628943	0.235867	0.0952751	0.130119	-0.510407	-1.08767	-0.138615	-0.496963	-0.316699	-0.172169
YER026C	Cho1	S(42)	DENDGYASDEVGGTLsR	1	-1.0981	-1.065	-0.358351	-0.124904	-0.42396	-0.153035	0.498056	0.514814	1.01243	0.73976	0.369926	0.0883701
YER026C	Cho1	S(34)	DENDGYAsDEVGGTLSR	1	-0.199307	0.540787	0.660251	0.651953	0.679018	0.12044	-0.940159	-0.5725	-0.0513567	-0.680876	-0.148447	-0.0598031
YER026C	Cho1	S(34);S(42)	DENDGYAsDEVGGTLsR	2	-0.903731	-1.36514	-0.103978	-0.123595	-0.110993	0.382227	-0.22137	-0.114341	0.717408	0.560323	0.622664	0.660526
YER026C	Cho1	S(4)	MVEsDEDFAPQEFPHTDTDVIVNEHR	1	-0.1451	0.374054	0.321015	-0.119175	0.383562	0.194995	-0.358492	-0.0747957	-0.148093	-0.338355	-0.0528914	-0.0367241
YER030W	Chz1	S(66);T(71)	sENNGtVEDSESDMDDAK	2	-0.542999	0.17963	0.36669	0.386855	0.237127	0.256325	0.143995	-0.48615	0.201752	0.0246044	-0.406566	-0.361265
YER033C	Zrg8	S(11);T(12)	stSFDESPKR	2	0.165084	-0.357685	0.363419	0.587162	0.516753	1.00702	-0.3065	-0.567167	-0.290561	0.00504374	-0.448195	-0.674371
YER033C	Zrg8	S(275)	IHsHDDIINLGK	1	0.108549	0.397646	-0.0460259	0.177602	0.0500727	-0.338475	0.0548595	0.076758	-0.185293	-0.297813	0.0178377	-0.0157178
YER034W	Yer034W	S(145)	QMsTDELNR	1	-0.443263	-0.468407	0.1449	0.544556	0.550959	0.526531	0.327269	-0.00476573	-0.396842	-0.315233	-0.183022	-0.282682
YER038C	Kre29	S(81)	AEsGDDFDPILKR	1	0.0253611	-0.000324943	0.021635	0.0564307	0.167413	-0.00835276	-0.357231	-0.380884	-0.140532	0.0699388	0.283354	0.263192
YER038C	Kre29	S(151)	ETLDsPR	1	0.00414045	-0.235825	0.298742	0.506649	0.232479	0.446781	-0.172114	-0.232272	-0.248993	-0.21988	-0.114255	-0.265453
YER040W	Gln3	S(469)	HNsNTVTPNFR	1	-0.288823	-0.629556	0.0841465	0.670296	0.157461	0.242703	-0.193989	-0.470897	0.105865	0.0720666	0.135339	0.115388
YER040W	Gln3	T(699)	LSSDSTSPIKYEADVStGGK	1	0.313107	0.384106	0.157298	0.260003	0.2719	0.389786	-0.911132	-1.40098	-0.0702536	-0.0286891	0.23908	0.395771
YER052C	Hom3	S(342)	GESTPPHPPENLsSSFYEK	1	-0.230466	-0.0224876	0.090878	0.155636	0.365589	-0.0187736	-0.335255	-0.0163427	-0.2317	-0.412439	0.340954	0.314407
YER054C	Gip2	S(137)	IELPPLsPK	1	0.595246	0.516111	-0.693198	-0.536241	-1.02401	-1.41907	-0.140528	-0.279625	1.3246	1.52702	-0.0621076	0.191802
YER054C	Gip2	S(194)	SKsLPTTPGIR	1	-0.159157	-0.424856	-0.258798	-0.364236	-0.78609	-0.389417	-0.258638	-0.336283	1.53692	1.72946	-0.0742375	-0.214664
YER054C	Gip2	Y(44)	VNSDLyNK	1	-0.285257	-0.687211	-0.720299	-0.616082	-0.538326	-0.897479	-0.198423	0.039062	1.37339	1.7924	0.368914	0.369305
YER059W	Pcl6	S(19);T(20)	stYSIQSDDKANLGSGNVDIR	2	0.216628	0.116963	-0.0978445	-0.068723	-0.387836	-0.0867034	0.176918	0.109342	0.271727	0.247628	-0.179593	-0.318507
YER069W	Arg5,6	S(359)	RSsIGEFPSADALR	1	0.246728	-0.251981	-0.702331	0.0593402	-0.18162	0.172082	0.399144	0.0161859	-0.423851	0.0627663	0.661931	-0.0583932
YER070W	Rnr1	T(826)	EASPAPTGSHSLtK	1	0.246158	0.403463	1.26764	1.22999	0.885899	1.09049	-0.750792	-0.851846	-0.637628	-0.892512	-1.01128	-0.979582
YER079W	Yer079W	S(39);S(41)	sMsPSNIASGEDR	2	-0.288864	-0.302492	-0.89771	0.133006	-0.618462	-0.101381	0.822054	0.200975	0.739749	0.313704	0.243233	-0.243812
YER079W	Yer079W	S(41)	SMsPSNIASGEDR	1	0.641077	0.267824	-0.590856	-0.186545	-0.773588	-0.353197	0.36975	0.172742	0.625851	0.574257	-0.272234	-0.475081
YER079W	Yer079W	S(43)	SMSPsNIASGEDR	1	0.719597	0.46549	-0.559415	0.282413	-0.965875	-0.322215	0.299754	-0.0353614	0.70765	0.325991	-0.201711	-0.716318
YER079W	Yer079W	S(66)	TNSGCSITSGAsMIATK	1	0.778044	1.96539	-0.289572	-0.958767	-0.693322	-1.15599	0.659546	1.32647	0.127589	-1.56233	-0.582285	0.385229
YER092W	Ies5	T(124)	ETPLLYNDTHtP	1	0.214837	0.332304	0.131386	-0.0185767	-0.183765	-0.167565	-0.20337	-0.22288	0.00422782	0.0942105	0.0366835	-0.0174927
YER093C	Tsc11	T(86);S(87)	RLENSAPSPtsPLMAR	2	0.0786054	-0.0270203	0.036086	0.761153	0.033255	0.140166	-0.0851991	-0.529578	-0.154057	-0.15211	0.0913094	-0.192611
YER100W	Ubc6	T(187)	KLDEGDAANTGDETEDPFtK	1	-0.0525095	0.279961	0.170213	0.272304	-0.0128145	0.539416	-0.745898	-1.21059	0.202173	-0.435386	0.438835	0.55429
YER105C	Nup157	S(521)	ANSGELsK	1	-0.0415658	-0.0692003	0.36584	0.258056	0.186464	0.324744	-0.0829076	0.0298352	0.137144	0.12876	-0.564976	-0.672195
YER111C	Swi4	S(807)	ILENsPILYR	1	0.227441	0.315583	0.299343	0.214537	0.358344	0.41781	-0.251761	-0.471794	-0.352768	-0.260799	-0.2806	-0.215338
YER114C	Boi2	S(375);T(388)	KTSQsLEDLPSQQNFIPtPR	2	-0.167016	0.426086	0.231357	-0.00358007	0.261361	-0.430576	-0.970994	-0.646879	0.256177	0.0435533	0.389116	0.611396
YER114C	Boi2	S(375)	KTSQsLEDLPSQQNFIPTPR	1	0.365887	0.821836	0.0693648	-0.168189	-0.0274233	-0.79465	-0.304279	0.475604	-0.19721	-0.554373	0.09366	0.219772
YER114C	Boi2	S(519)	ALsPIPSSTR	1	0.225702	0.342943	0.322111	0.427601	0.0861429	0.241582	-0.416798	-0.475701	0.0619824	-0.0643022	-0.279141	-0.472123
YER114C	Boi2	S(191)	NTMSDIDNALLEFKDDsIGPPDR	1	-0.0266297	0.379192	-0.2492	-0.691619	-0.177661	-0.452786	0.266842	0.158108	0.0571096	0.255581	0.129539	0.351524
YER114C	Boi2	S(630);S(631)	RNssLKR	2	-0.256559	-0.386834	0.251985	0.687985	0.436894	0.786786	-0.976083	-1.52804	0.241727	0.293965	0.302036	0.146136
YER114C	Boi2	S(546)	RNsVPYYGYAPESSSDR	1	-0.290062	-0.25321	0.474534	0.640659	0.151843	0.409118	-0.509617	-0.533312	0.19778	-0.082753	-0.0244785	-0.180501
YER114C	Boi2	S(678)	SSSPEENPITSMPsEK	1	0.498307	0.340055	0.407724	0.281637	-0.326331	-0.0174012	-0.335939	-0.235931	0.00652294	-0.00684714	-0.250284	-0.361513
YER116C	Slx8	T(66);S(67)	ALENtsEEDGDDDLSLFR	2	0.345292	0.512364	-0.831766	-0.167334	-0.304289	-0.405985	0.884119	-0.166694	0.171265	0.292883	-0.264621	-0.0652343
YER116C	Slx8	S(67)	ALENTsEEDGDDDLSLFR	1	0.259254	0.453088	0.54234	0.0386912	0.119607	-0.266173	-0.511932	-0.161405	0.138535	0.246014	-0.547803	-0.310215
YER118C	Sho1	Y(186)	NTTPyQNNVYNDAIR	1	0.479099	0.740407	0.681661	0.147461	0.758295	0.227432	-0.871825	-0.504325	-0.49301	-0.702834	-0.554221	0.0918577
YER120W	Scs2	T(145)	EtVEPVVQDSEPKEVPAVVNEK	1	-1.40514	-1.12503	-0.756414	-0.797086	-0.167652	-0.259624	2.25027	2.00196	0.431161	0.5698	-0.352226	-0.390014
YER120W	Scs2	T(204)	QTSNStPAPQNQIK	1	0.653508	0.871155	-0.0877288	-0.472869	-0.577361	-0.236742	0.550505	0.229252	0.286752	0.430754	-0.825677	-0.821549
YER122C	Glo3	S(306)	GNNNNsIDDINTQPDEFNDFLNDTSNSFDTTRK	1	0.32475	-0.104074	-1.00175	-0.193634	-1.06593	-0.916108	2.18632	1.85502	-0.784021	-1.01294	0.340634	0.371737
YER122C	Glo3	S(389)	AIsSDQLFGR	1	-0.27166	-0.354445	0.364975	0.353906	0.448692	0.273186	0.276583	0.267083	-0.445398	-0.292715	-0.373192	-0.247015
YER122C	Glo3	S(398)	AISSDQLFGRGsFDEAANR	1	-0.453737	-0.478288	-0.101217	0.109818	-0.155346	0.0204157	-0.185834	-0.258321	0.547331	0.352884	0.348803	0.253491
YER123W	Yck3	S(392)	QQAQNsYNKDNSK	1	-0.429062	-0.505509	-0.0790976	0.088199	0.322363	0.229373	0.330544	0.106494	-0.211744	-0.0648576	0.0669977	0.146302
YER129W	Sak1	S(961);S(964)	LsELsNSPQK	2	-0.478722	-0.653482	0.291806	0.516513	0.379144	0.289381	-0.37012	-0.349784	0.171666	0.232423	0.00622752	-0.0350513
YER132C	Pmd1	S(1354);S(1356)	RsSsFTETVPTEPTR	2	-0.442439	-0.821887	-0.401296	0.0614531	0.384466	0.426992	0.11245	-0.124983	0.00325171	0.237748	0.343568	0.220677
YER132C	Pmd1	S(989)	RIsNSSLLR	1	0.789415	1.14333	0.0531865	0.526521	-0.0407732	-0.403971	-0.286247	-0.247103	-0.233095	-0.418888	-0.282485	-0.599887
YER132C	Pmd1	S(1664)	FSQAPSTQIsPR	1	-0.208633	-0.0781328	-0.108199	0.21734	0.317772	0.0114763	-0.0323806	-0.331613	-0.309928	-0.24024	0.341368	0.421169
YER132C	Pmd1	S(1610)	GsSSPTLSR	1	0.324036	0.221114	0.691934	0.938865	0.217985	0.588396	-0.278351	-0.633939	-0.520252	-0.584648	-0.435352	-0.529788
YER151C	Ubp3	S(257)	SHsIPK	1	-1.26821	-0.639467	0.607575	0.539536	0.380559	0.713483	-0.617409	-0.397045	0.860028	0.263131	0.037454	-0.479638
YER155C	Bem2	S(1012)	sRPASMVIETPK	1	-0.607438	-0.420945	0.0388736	0.196767	0.441511	0.220524	-0.688587	-0.696813	0.49907	0.420365	0.31657	0.280102
YER155C	Bem2	S(168);S(170)	SSsLsPPQSR	2	0.109761	-0.101895	0.510034	0.954303	0.120472	0.245942	-0.226352	-0.915871	-0.287145	0.110931	-0.226771	-0.293411
YER155C	Bem2	T(1050);S(1054)	TRDSLDTtGRLsK	2	-0.263989	-0.533229	0.101313	0.441763	0.11319	0.501761	-0.618643	-0.941575	0.380043	0.30486	0.288086	0.22642
YER159C	Bur6	S(141)	EGLCVEEGQAQPEEEsA	1	-0.533881	0.215714	-0.176868	0.648627	-0.0817449	0.283238	0.454215	-0.528633	0.688575	0.174364	-0.350297	-0.79331
YER164W	Chd1	S(1372)	EYDsMDEEDCR	1	-0.637191	-0.405152	0.825713	0.66483	0.387983	0.672196	-0.473903	-0.279274	0.592348	0.0902856	-0.694949	-0.742886
YER164W	Chd1	S(48)	AAAHQQNYFNDSDDEDDEDNIKQsR	1	0.694532	0.958914	-0.459747	0.00657059	0.279255	-0.263639	0.0775514	-0.280748	-0.771878	-0.638693	0.180287	0.217596
YER164W	Chd1	S(1339)	GPAALINNTRLSPNsPAPPLK	1	0.849514	1.29837	-0.231991	-0.862836	-0.636502	-0.658219	0.529213	0.900243	-0.223519	-1.04612	-0.286716	0.368564
YER164W	Chd1	S(36)	AAAHQQNYFNDsDDEDDEDNIK	1	0.0243659	0.0816454	0.489178	0.257491	0.326071	-0.0919462	-0.318753	0.198677	0.0186495	-0.176141	-0.539512	-0.269725
YER164W	Chd1	S(1279)	EGLNTKSPSADIGsK	1	0.208556	-0.288633	-0.185614	0.239326	-0.0894225	0.110567	0.229653	0.230582	-0.243727	0.198358	0.0805539	-0.490201
YER166W	Dnf1	S(1506)	ETQDLLQsPQFQQAQTFGR	1	1.10143	1.5287	-0.223696	-0.959051	0.0613825	-0.809172	-0.569695	-0.0306055	-0.816969	-0.502695	0.447549	0.772826
YER166W	Dnf1	S(1545)	EQMIATNQLDNRYsVER	1	0.700572	0.567587	-0.581575	-0.591519	-0.44065	-0.536118	0.582871	0.440861	-0.656268	-0.707381	0.39505	0.82657
YER166W	Dnf1	T(70)	REDAEEFtFNDDTEYDNHSFQPTPK	1	-0.190964	-0.54097	-0.177504	-0.113832	-0.445355	-0.289897	0.0523204	-0.115244	0.251943	0.507431	0.50956	0.552512
YER167W	Bck2	S(334)	HSPDsPR	1	0.435345	0.709693	0.59744	0.50019	0.356322	0.558784	-1.05509	-1.04561	-0.130366	-0.670642	-0.203655	-0.0524146
YER169W	Rph1	S(590)	ESSRsPIALNYEAR	1	0.0378038	0.108205	-0.00194474	0.330422	0.0564687	0.0892328	-0.191841	-0.288336	-0.203813	-0.280881	0.303326	0.0413567
YER169W	Rph1	S(587);S(590)	EsSRsPIALNYEAR	2	0.456474	0.489975	0.181062	-0.120279	-0.154159	-0.00561662	-0.0531943	0.0550728	-0.220057	-0.519015	-0.210126	0.0998628
YER176W	Ecm32	S(212)	ENSTIQSSsSSNLR	1	-0.137229	0.252801	0.0850414	0.468699	0.192055	-0.289097	0.480303	0.487605	-0.18358	-0.812295	-0.436591	-0.107712
YER178W	Pda1	S(336)	YGGHsMSDPGTTYR	1	0.80123	0.696476	0.141043	0.123175	-0.457194	-0.157637	0.559437	0.51164	-0.175099	0.0464832	-0.869417	-1.22014
YER178W	Pda1	Y(332)	yGGHSMSDPGTTYR	1	0.431678	0.337792	0.143727	0.359794	-0.271235	0.236543	0.476426	-0.0454497	-0.152379	-0.188307	-0.628217	-0.700371
YFL004W	Vtc2	S(657)	LMGVDsEEEEIELPPGVK	1	-0.27064	-0.15599	0.186259	0.01158	0.28295	0.435919	-0.302378	-0.317166	0.129203	0.231872	-0.0253945	-0.206215
YFL004W	Vtc2	S(196)	FSSIVsNDIDMNFR	1	-0.254426	-0.276774	0.174253	0.102925	0.0848187	0.356403	-0.013073	-0.285859	-0.0982096	0.0313394	0.106637	0.0719655
YFL007W	Blm10	S(56)	LYAADGRPHsPLR	1	0.0296742	0.114023	0.298755	0.254376	-0.161922	0.00146526	-0.170846	-0.13809	0.155754	0.198952	-0.151415	-0.430727
YFL007W	Blm10	S(1041)	TQsNLSYR	1	0.252328	0.051927	0.530792	0.357337	-0.241144	0.119608	0.108358	-0.0539412	-0.0435115	0.19438	-0.606823	-0.66931
YFL013C	Ies1	S(27)	EDNSDETKTDsPMQSVK	1	0.16233	0.224502	-0.155048	-0.251975	0.291747	0.335619	-0.0912794	-0.0029537	-0.238818	-0.156404	0.031069	-0.148789
YFL013C	Ies1	S(487)	KPsIGGDKSEEDGEGEDDKSEETVEETR	1	0.204518	0.160789	0.172807	0.194463	0.560221	0.68096	-0.875795	-1.20781	-0.143902	-0.255892	0.0821521	0.427486
YFL014W	Hsp12	S(21)	ASEALKPDsQK	1	0.735674	-0.425509	-0.899501	0.186872	-0.98191	-0.230958	1.93127	1.66472	0.327863	0.182083	-1.1134	-1.3772
YFL014W	Hsp12	S(73)	DNAEGQGEsLADQAR	1	-0.174402	-0.509011	-0.470085	0.0321746	-0.515915	0.166401	2.31239	1.52654	-0.175926	-0.116731	-0.976058	-1.09938
YFL014W	Hsp12	S(87)	sKLNDAVEYVSGR	1	0.467014	0.0176492	-1.54185	-1.08139	-1.11026	-0.414221	2.58009	2.15988	0.189606	0.275071	-0.584588	-0.95699
YFL014W	Hsp12	S(59)	GVFQGVHDsAEK	1	1.5315	0.522429	-1.0217	-0.480846	-1.02935	-0.254219	1.62608	1.58106	0.00858407	-0.0601027	-1.11512	-1.30832
YFL021W	Gat1	S(274)	NPSPSIVKPGsR	1	-0.635713	-0.597551	-0.133114	0.273304	-0.0288492	0.0123883	-0.670068	-0.773807	0.645605	0.349425	0.822139	0.73624
YFL023W	Bud27	S(640)	ILENIsDDDNDDDDGNKK	1	0.203924	-0.0403348	0.179717	0.0196277	0.200072	0.130873	-0.33685	-0.0609012	-0.289992	-0.149342	0.0431293	0.100077
YFL033C	Rim15	S(1542)	KGsIIGDNQQTTANSSDSPTMTK	1	-0.557405	-0.0422995	-0.475442	-0.230338	-0.363729	-0.489904	0.0118299	0.15385	0.768059	0.216244	0.616686	0.392447
YFL033C	Rim15	S(1764)	SQEDEEHTILsDSDETH	1	0.0665883	-0.0157275	0.179949	0.663845	0.215315	0.346174	-0.205884	-0.179633	-0.111694	-0.477374	-0.144275	-0.337285
YFL038C	Ypt1	T(181)	ESMSQQNLNEtTQK	1	-0.866981	-0.812667	-0.400109	-0.579992	-0.523355	-0.454716	0.841198	1.09699	0.837696	0.784923	0.111552	-0.0345346
YFL042C	Lam5	S(128)	REPsMGSK	1	-0.548813	-0.515812	-0.0771909	0.18776	0.144599	0.344009	-0.927993	-1.08525	0.387443	0.116701	1.02196	0.952595
YFL042C	Lam5	S(140)	RIsNATIAEIGSPLQQVEKPDEVK	1	0.363517	-0.0713027	-0.597666	-1.4349	0.268832	-1.08094	-0.466777	0.517952	-0.69233	-0.417494	1.12442	2.48669
YFL042C	Lam5	S(103)	SNVPsPVSR	1	0.00127772	0.286472	0.277009	0.789844	0.621474	0.772112	-0.809094	-1.27185	-0.479812	-0.843603	0.389146	0.267026
YFL045C	Sec53	S(237)	TIGHsVQSPDDTVK	1	0.135946	-0.081162	0.0860014	0.385802	0.0464021	0.240135	-0.00287271	0.253803	-0.21335	-0.147038	-0.0521263	-0.65154
YFL054C	Aqy3	S(189)	RGsTDISR	1	0.288534	0.335584	0.0187309	0.408669	-0.131895	-0.0556703	-0.15973	-0.515573	0.557336	0.990412	-0.572975	-1.16342
YFL054C	Aqy3	S(107)	TLNsFSDAEQAR	1	0.224881	0.00982318	0.063522	-0.0574022	-0.323795	-0.0993095	-0.0366609	-0.0494723	0.718389	0.96307	-0.646336	-0.766709
YFR003C	Ypi1	S(22)	TVsVEEVPAVLQLR	1	0.887883	1.32727	-0.930768	-1.37025	-0.377939	-0.884571	1.12197	1.29282	-1.22531	-1.31733	0.524168	0.95206
YFR003C	Ypi1	S(133)	SYsPNAYEIQPDYSEYR	1	0.052274	0.523117	0.258082	-0.0696147	-0.0549777	-0.311035	-0.517909	-0.0640159	0.37784	-0.204851	-0.11531	0.126399
YFR014C	Cmk1	S(417);S(425)	VCsSDSDLPGsDKK	2	0.426654	0.170916	-0.266319	0.393285	-0.563781	-0.436622	0.373311	-0.0326092	-0.418459	-0.416289	0.448595	0.321319
YFR015C	Gsy1	S(651);S(655)	IARPLsVPGsPK	2	0.0496927	-0.0212929	0.719209	0.393761	-0.547576	-0.583126	-1.32563	-1.14146	0.545267	0.56488	0.559034	0.787236
YFR016C	Yfr016C	T(679)	CtSGRPEDLQINER	1	-0.499987	-0.302155	0.235682	0.261005	0.0257343	0.162292	-0.0805547	-0.00781708	0.531619	0.19682	-0.212493	-0.310146
YFR016C	Yfr016C	S(926)	DVTGDQEIDDINIsDEFQR	1	-0.185319	0.0452205	-0.162954	-0.321881	-0.0331859	0.0490381	-0.299925	-0.163574	0.282753	0.0544128	0.398631	0.336784
YFR016C	Yfr016C	S(671)	SKTPEsPK	1	0.00523888	-0.133561	0.29564	0.0524619	0.212182	0.356624	-0.319211	-0.329252	-0.190722	-0.0902206	-0.00312835	0.143947
YFR017C	Igd1	S(83)	ERESsIGEHAPGAER	1	-1.34126	-1.12984	-0.413385	-0.0140908	-0.793652	-0.21869	0.535656	0.250991	1.59042	1.30584	0.422221	-0.194206
YFR017C	Igd1	S(175)	KSsFKYEDFK	1	-1.17378	-0.859417	-0.149691	-0.766863	-1.01859	-0.445565	0.500246	0.610472	1.86534	1.70416	-0.023524	-0.242786
YFR017C	Igd1	S(95)	RsSGPMDFQNTIHNMQYR	1	0.0517383	0.0360236	-0.140659	0.16642	-0.35083	-0.337332	0.750291	0.596142	-0.478992	-0.828168	0.168451	0.366914
YFR017C	Igd1	S(64);T(65)	RRstNYMDALNSR	2	-0.546591	-0.735995	-0.265592	0.199194	-0.623377	0.0817308	1.05783	1.09452	0.223486	-0.604791	0.154246	-0.0346595
YFR017C	Igd1	S(14)	TDPHLNTPQVSTsPTFER	1	-0.0190745	0.231565	-0.15247	0.0458618	-0.416995	-0.349154	0.136501	0.0552492	0.442708	0.277183	0.0093305	-0.260704
YFR017C	Igd1	S(164)	VPHGsPPQLGTR	1	-0.301127	-0.254596	-0.0527218	0.427278	-0.304655	-0.00971213	0.09691	-0.521165	0.66618	0.339642	-0.104586	0.0185531
YFR019W	Fab1	S(745)	KFsNSSGSNNNSNSNSNINTDPWK	1	-0.248761	-0.478948	-0.0853771	-0.130626	-0.130593	0.18347	-0.749013	-0.626006	0.727634	0.488013	0.48611	0.564096
YFR024C-A	Lsb3	T(298);S(303)	LAPtNSGGsGGK	2	-0.44994	-0.492187	0.640064	0.368926	0.456837	0.599416	-0.273956	-0.276712	0.128572	0.0493868	-0.501578	-0.24883
YFR024C-A	Lsb3	S(303)	LAPTNSGGsGGK	1	-0.434775	-0.375851	0.442439	0.192413	0.409139	0.519171	-0.650284	-0.676245	0.335009	0.381052	-0.101528	-0.0405391
YFR024C-A	Lsb3	S(300)	LAPTNsGGSGGKLDDPSGASSYYASHR	1	0.161215	0.912029	0.0370852	-0.348258	0.0762551	-0.651584	-0.263308	0.257312	-0.160417	-0.944258	0.149171	0.774759
YFR024C-A	Lsb3	S(381)	ISsASTPQTSQGR	1	0.148518	0.302355	0.594913	0.636704	0.869384	1.01784	-0.792896	-1.39518	-0.5262	-0.382467	-0.293718	-0.179251
YFR024C-A	Lsb3	S(380)	IsSASTPQTSQGR	1	0.234616	0.385629	0.534023	0.818348	0.763321	0.725547	-0.645404	-0.878268	-0.599922	-0.613272	-0.286634	-0.437984
YFR024C-A	Lsb3	S(383);T(384)	ISSAstPQTSQGR	2	0.520161	0.400221	0.704406	0.944209	0.673967	0.770646	-0.493526	-0.822156	-0.684013	-0.523006	-0.720995	-0.769914
YFR034C	Pho4	S(242)	RsSGALVDDDKR	1	-0.19675	-0.381223	0.869058	0.682998	0.529031	0.769276	-0.724876	-0.849331	-0.037916	0.230535	-0.438547	-0.452255
YFR034C	Pho4	Y(154)	SNSSPyLNK	1	0.0601446	-0.00552242	0.82159	0.406612	0.486049	0.793588	-0.443108	-0.472698	-0.216608	0.0166831	-0.708067	-0.738662
YFR053C	Hxk1	T(156)	DTLPLGFtFSYPASQNK	1	0.461058	-0.102927	-0.541052	-0.661372	-1.21312	-1.89006	-1.01913	-0.313857	0.377476	0.0330273	1.93478	2.93519
YFR053C	Hxk1	S(158)	DTLPLGFTFsYPASQNK	1	-0.673211	-0.156042	-0.19986	-0.593905	-0.410436	-1.28516	-0.696346	-0.377597	0.375913	-0.115154	1.60394	2.52786
YFR053C	Hxk1	S(15)	GsMADVPK	1	-0.978085	-0.993171	-0.0353572	-0.10055	-0.12692	-0.0152941	-1.00088	-1.01391	0.711459	0.571755	1.42979	1.55117
YFR053C	Hxk1	S(272)	LADDIPSNSPMAINCEYGsFDNEHLVLPR	1	0.392462	0.170706	0.381948	-0.467614	-0.486542	-0.13703	-0.702593	-0.0720835	-0.214834	-0.40686	0.629558	0.912881
YFR053C	Hxk1	S(262)	LADDIPSNsPMAINCEYGSFDNEHLVLPR	1	-0.207825	0.504295	0.260126	-0.480881	0.287343	-0.529522	-0.57455	-0.138252	-0.392898	-0.565163	0.627804	1.20952
YGL008C	Pma1	T(647)	KADtGIAVEGATDAAR	1	-0.80924	-0.985275	-0.429682	0.0378243	-0.432411	-0.120268	0.538908	0.372552	1.52398	1.53524	-0.391552	-0.840074
YGL008C	Pma1	S(899);S(911)	sVEDFMAAMQRVsTQHEK	2	0.164087	-0.293566	-0.307469	0.283857	-0.0705646	-0.186315	-0.334308	-0.415207	-0.268637	-0.5925	0.816891	1.20373
YGL008C	Pma1	S(911)	VsTQHEK	1	-0.935958	-0.557627	-0.242816	0.391152	-0.208962	-0.130534	0.00395558	0.311234	1.04415	-0.0898408	0.339632	0.0756149
YGL008C	Pma1	T(918)	VSTQHEKEt	1	-0.554271	-0.844886	-0.294841	0.0192198	-0.22531	-0.0524109	0.687623	0.672965	-0.0783382	0.380554	0.465137	-0.175441
YGL009C	Leu1	S(495)	DQDQSSPNVEVTsEDEK	1	-1.25989	-0.453776	0.0247054	-0.43406	-0.313596	-0.0630556	-0.473107	0.130489	1.55156	0.397207	0.470324	0.423196
YGL009C	Leu1	S(488)	EFEYKDQDQSsPNVEVTSEDEK	1	-0.392957	-0.319266	-0.622508	-0.429791	-0.636344	-0.602191	-0.384605	0.393557	1.12046	0.023788	0.915956	0.933903
YGL013C	Pdr1	S(948)	NNsLPEFAQLPSFR	1	-0.135578	-0.31226	-0.256155	-0.71065	0.184597	0.303521	-0.283117	-0.329958	0.148198	0.435833	0.342056	0.613514
YGL013C	Pdr1	S(942)	SAPsPVR	1	-0.112028	0.00245923	0.31079	0.063683	0.239116	0.554455	-0.216295	-0.449077	0.0411481	0.102808	-0.262732	-0.274328
YGL013C	Pdr1	S(942);S(948)	SAPsPVRNNsLPEFAQLPSFR	2	0.210469	0.0483293	-0.38776	-0.753523	0.0717787	-0.268387	-0.276824	-0.132949	-0.21983	0.208778	0.602167	0.897752
YGL014W	Puf4	S(286)	IEETsKEDLINK	1	-0.241444	-0.194593	-0.509439	-0.76269	-0.681615	-0.362726	1.29814	1.22826	0.169143	0.152969	-0.0347872	-0.0612205
YGL023C	Pib2	S(165)	TLPFTDDQRsNPELDPTNSVVDVSR	1	-0.23955	-0.0113495	-0.634982	-0.550874	0.128271	-0.0901148	1.05062	0.4843	-0.331016	0.172445	0.026659	-0.00440671
YGL023C	Pib2	S(124)	KNsAEENVR	1	-0.22682	-0.394667	0.4941	0.346703	0.110388	0.679066	-0.551681	-0.867393	0.265916	0.140136	-0.0919032	0.0961543
YGL023C	Pib2	S(300);S(317)	KPsLEFLPQPASSTNLNFNsNK	2	-0.440262	-0.530264	-0.332777	-0.688044	-0.018891	-0.493228	0.585499	0.932844	-0.0741265	0.416542	0.280558	0.36215
YGL035C	Mig1	S(264)	QLQQQQNSLsPR	1	-0.0890717	-0.134615	0.0419736	0.100253	0.0717468	0.0867589	0.177139	0.141477	0.0583356	0.0695625	-0.260124	-0.263436
YGL035C	Mig1	S(314)	RPSSVLsLNDLLVGQR	1	-0.0123509	0.251782	-0.139218	-0.302811	0.111223	-0.520359	-0.255178	0.0727855	-0.0794538	-0.0774479	0.374977	0.57605
YGL035C	Mig1	S(311)	RPSsVLSLNDLLVGQR	1	0.301215	0.239199	-0.260167	0.45749	0.0462295	-0.711582	-0.0475361	0.253546	-0.20324	-0.504442	0.163499	0.26579
YGL035C	Mig1	S(278)	sLTDFQGLNNANPNNNGSLR	1	-0.264253	0.884087	-0.0616502	-0.596964	0.00378393	-1.02583	0.214693	1.36512	0.130555	-1.69717	-0.0231284	1.07076
YGL035C	Mig1	S(370);S(377)	SKTsTPTTMLsR	2	-0.438964	-0.169163	0.283329	0.248781	0.431006	0.123984	0.445422	0.682765	-0.280013	-0.613934	-0.440781	-0.272433
YGL049C	Tif4632	S(913)	ANMFDALMNNDGDsD	1	0.13138	0.128616	-0.0818942	-0.268725	-0.0843733	-0.545928	0.0971555	0.40577	-0.213738	0.0438492	0.15147	0.236419
YGL049C	Tif4632	S(74)	NNsQGNAQYYNNR	1	-0.566416	-0.382026	-0.330658	0.541271	0.167825	0.0384982	-0.148165	-0.429837	0.565715	-0.343272	0.311698	0.575366
YGL049C	Tif4632	T(196)	EAtPVLPANEAVK	1	0.393664	0.473925	0.285484	-0.402321	-0.478348	-0.446605	0.0157966	0.331874	0.286832	0.191147	-0.503428	-0.14802
YGL049C	Tif4632	T(189)	SGtPFEK	1	0.575698	0.924957	0.451934	-0.121421	-0.179197	-0.128721	-0.240457	-0.141122	-0.0382212	-0.0991254	-0.569757	-0.434567
YGL056C	Sds23	S(430)	MANsPVLK	1	0.326708	0.443757	-0.0134296	-0.405569	0.116592	0.104721	-0.736075	-0.757729	0.292816	0.461502	0.0133888	0.153318
YGL056C	Sds23	S(42);T(44);S(46)	NTEANKsDtEsLHK	3	-0.579054	-0.485444	-0.128099	0.0121928	-0.241575	-0.0654219	-0.0855472	-0.203534	1.14642	1.19503	-0.112141	-0.452821
YGL062W	Pyc1	T(527)	SNPSVPHLHDAQGNVINVtK	1	0.446769	0.505191	-0.380023	0.145264	0.136981	-0.213712	0.00186869	-0.283935	-0.477136	-0.159033	0.27154	0.00622387
YGL066W	Sgf73	T(193)	STSMESANTPNMDtK	1	-0.12087	-0.110547	0.149175	0.112587	0.0535421	0.136464	-0.38938	-0.323506	0.303034	0.289512	0.00449941	-0.104509
YGL076C	Rpl7A	S(11)	ILTPEsQLK	1	0.170174	0.275857	-0.0233131	-0.144068	-0.478069	-0.280693	-0.223423	-0.139323	0.924881	0.763669	-0.370249	-0.475442
YGL076C	Rpl7A	T(8);S(11)	ILtPEsQLKK	2	-0.722614	-0.906146	-0.873502	-1.03827	-0.899998	-0.645344	0.971552	0.904045	1.47412	1.75414	0.0504397	-0.068425
YGL076C	Rpl7A	S(228)	HFIQGGsFGNR	1	-0.459561	-0.271067	0.123555	0.34118	-0.0206097	0.255949	0.232425	0.0493083	0.293015	-0.190999	-0.168824	-0.184371
YGL083W	Scy1	T(673)	TGSSYGEtSPQSK	1	0.332944	0.456808	0.807614	0.461233	0.383791	0.682477	-1.08077	-1.49165	-0.208806	-0.224051	-0.234772	0.115184
YGL083W	Scy1	S(791)	DGsSDIPR	1	-0.00772468	-0.261144	0.209566	0.372039	0.112018	0.243468	-0.416138	-0.618643	-0.0530836	0.0174193	0.155362	0.24686
YGL083W	Scy1	S(711)	ILNSPPQTPSsR	1	0.127234	0.184104	0.206566	0.50269	0.047127	0.193537	-0.251545	-0.717451	-0.0529338	-0.0420714	-0.0764484	-0.120808
YGL092W	Nup145	Y(685);S(690)	AyEPDLsDADFEGIEASPK	2	-0.17821	-0.245914	0.0253858	-0.421679	-0.368399	-0.111689	-0.417157	-0.284816	0.348137	0.467229	0.590243	0.596869
YGL092W	Nup145	S(700)	AYEPDLSDADFEGIEAsPK	1	0.257324	0.431124	0.0621755	-0.0553701	0.254219	0.167556	-0.216981	-0.25093	-0.409491	-0.135595	0.052754	-0.156785
YGL120C	Prp43	S(31)	RFSSEHPDPVETSIPEQAAEIAEELsK	1	0.618845	0.219558	-0.0178744	0.277012	0.251664	-0.345511	-0.849929	-0.374245	-0.25721	-0.465858	0.254505	0.689044
YGL120C	Prp43	S(38)	QHPLPsEEPLVHHDAGEFK	1	0.390167	0.161077	-0.181281	-0.0444841	-0.574808	-0.434064	0.275911	-0.236348	0.221938	0.471474	-0.131927	0.0823456
YGL131C	Snt2	S(468)	RNsYISANSEEER	1	-0.291673	0.0234143	0.0852213	1.00267	0.120903	0.52556	-0.113448	-0.862536	0.212003	-0.369361	-0.0130051	-0.319743
YGL133W	Itc1	S(291)	SNSANVSSPEsEK	1	-0.0539273	0.0282455	0.438889	0.262401	-0.0374864	0.250479	0.0220298	-0.0729971	0.117583	0.0420451	-0.487088	-0.510174
YGL139W	Flc3	S(639)	DHDDNSDYEsNDTGVNDELK	1	-0.266019	-0.0893504	0.289896	0.561949	0.4106	0.603953	-0.583132	-0.761837	0.301735	-0.152736	-0.15308	-0.161979
YGL139W	Flc3	Y(637)	DHDDNSDyESNDTGVNDELK	1	0.026777	0.106958	0.369752	0.424717	0.130633	0.413929	-0.0693045	0.0708555	0.185074	0.216223	-0.642931	-1.23268
YGL139W	Flc3	S(687)	NENAsTDALR	1	-0.44342	-0.427764	0.455493	0.165292	0.190511	0.217244	-0.0329256	-0.215892	0.0331191	0.331042	-0.202778	-0.0699216
YGL139W	Flc3	S(709)	QQTFPHNLTNLsR	1	-0.299624	-0.310011	-0.13245	0.0990077	-0.0704953	-0.00686983	-0.0599449	0.0251412	0.258627	0.0154979	0.303888	0.177234
YGL153W	Pex14	S(280);S(288)	MGMQEEsDKEKENGsDANKDDNAVPAWK	2	-0.104979	-0.189629	-0.691207	-0.587651	-0.459386	-0.478741	0.853085	0.523936	-0.173891	0.153282	0.576378	0.578803
YGL153W	Pex14	S(280)	MGMQEEsDKEK	1	-0.476485	-0.231024	0.195239	0.0125627	-0.0909981	0.0359591	-0.215275	-0.0591594	0.536529	0.18905	0.0509899	0.0526111
YGL164C	Yrb30	Y(263)	yHEDDDKEDTPQELAIDLNHIK	1	-0.0415385	0.609716	-0.0897077	-0.317187	-0.611402	-1.01646	-0.302532	0.346583	0.564385	-0.126482	0.480796	0.503831
YGL166W	Cup2	S(73)	RPAVGsEEDETR	1	-0.576319	-0.0167028	0.381831	0.788832	0.725465	0.5871	-0.24573	-0.600288	-0.0734523	-0.417447	-0.211794	-0.341495
YGL180W	Atg1	S(635);S(638)	sMDsNAIAEEQDSDDAEEEDETLKK	2	-0.0516366	-0.417577	-0.338344	-0.438753	0.06372	0.0447925	-0.480997	-0.514456	0.491647	0.812478	0.315611	0.513516
YGL180W	Atg1	Y(480)	HPTPTQNQNVLLNEQFSPNNQQyFQNQGENPR	1	0.49348	0.923265	-0.0423119	-0.20321	-0.331306	-0.270038	0.223503	0.37884	0.0593411	-0.647062	-0.402705	-0.181794
YGL181W	Gts1	S(187)	SDYGGSRDsFQSSGSR	1	-0.235999	-0.125292	-0.0435503	0.470945	0.1529	0.0221666	0.0469367	-0.182031	0.0906564	-0.510126	-0.0109437	0.324337
YGL181W	Gts1	Y(181);S(187)	SDyGGSRDsFQSSGSR	2	-0.374443	-0.275455	-0.453546	0.276681	-0.264097	0.338605	0.616172	-0.00738975	0.221028	-0.594246	0.254886	0.261805
YGL197W	Mds3	S(934)	AsLDGQMLGK	1	-0.332303	-0.460913	-0.172578	-0.200175	-0.309159	-0.290585	-0.16703	-0.0504863	0.745285	0.713765	0.235785	0.288395
YGL197W	Mds3	S(948)	EGsTSQYTQPR	1	-1.091	-1.04718	-0.148752	0.419167	-0.124769	0.160898	-0.0643249	-0.517326	0.885767	0.729503	0.543084	0.254933
YGL197W	Mds3	S(693);S(698)	NNDEEDDEDPVsPKPVsK	2	-0.169186	-0.238309	-0.000154978	-0.246504	-0.141405	-0.0597792	-1.22885	-1.17698	0.907926	1.01286	0.631673	0.708714
YGL197W	Mds3	S(817)	QLQQLQQHTIQNPHNHLsPR	1	-0.033623	0.202001	0.188275	0.915839	-0.0281792	0.00396434	-0.46029	-1.11772	0.210813	-0.349541	0.123004	0.345454
YGL197W	Mds3	S(919);T(920)	RSstPETENAFSATPR	2	1.22186	0.77618	0.818922	0.956963	0.175528	0.15395	-1.34725	-0.942612	-0.170036	-0.437164	-0.699024	-0.507316
YGL197W	Mds3	S(959)	MNsFPK	1	-0.437191	-0.367432	0.0275411	-0.232404	-0.0490224	0.046872	-0.348248	-0.426684	0.468769	0.559702	0.338151	0.419944
YGL197W	Mds3	S(693)	NNDEEDDEDPVsPKPVSK	1	0.374192	0.0654457	0.577374	0.0491301	-0.0910914	-0.0541512	-0.996059	-1.13027	0.245624	0.705458	-0.110041	0.364392
YGL197W	Mds3	S(919);T(920);T(930)	RSstPETENAFSAtPR	3	-0.271071	-0.307484	-0.160955	0.14502	-0.121034	-0.00946691	-0.625806	-1.02845	0.699701	0.728849	0.479166	0.471529
YGL197W	Mds3	S(1202)	sTSGFSPR	1	-0.663822	-0.676625	-0.0859006	0.262511	-0.0296085	0.167867	-0.0341733	-0.298897	0.528508	0.394775	0.284996	0.150368
YGL205W	Pox1	S(40)	IKVDQVNTFLEsSPERR	1	1.34922	1.22329	-0.495991	-1.20406	-0.808278	-1.10652	-0.151182	0.340483	-0.110887	0.145933	0.217121	0.600875
YGL208W	Sip2	S(57);S(59)	CsDsQDAGQPSREGSITK	2	-0.249317	0.0190084	-0.0942798	-0.274881	0.290344	0.221494	0.0568324	-0.51688	0.197361	0.674494	-0.20094	-0.123235
YGL208W	Sip2	S(156)	EASGGPsEIK	1	0.635709	1.00403	0.0508139	0.0325219	0.282655	0.377448	-0.409782	-0.578541	-0.0142359	-0.0678418	-0.54516	-0.767612
YGL208W	Sip2	S(136);S(137)	QDASPDDDRSGHssPR	2	0.436683	0.860363	0.282136	0.0199699	0.16715	0.486345	-0.753227	-0.986723	0.53313	0.359875	-0.665873	-0.73983
YGL208W	Sip2	S(133);S(137)	QDASPDDDRsGHSsPR	2	0.25978	0.704997	0.517669	0.442674	0.45849	0.39013	-1.4091	-1.25451	0.741291	0.622569	-0.568136	-0.90586
YGL222C	Edc1	S(82);S(85)	KHsPPsSPSSTTTLGK	2	0.149355	0.42497	0.815127	0.853761	0.0499649	0.218339	-0.249565	-0.0610854	0.325167	-0.0834062	-1.09005	-1.35258
YGL227W	Vid30	S(248)	SRsAINIETESR	1	-0.170352	-0.38381	0.2878	0.120292	0.196664	0.179914	-0.181192	-0.0240419	-0.175094	0.0433234	0.0421737	0.0643219
YGL232W	Tan1	S(72)	EGEDEsENDEKK	1	-0.828172	-0.778254	0.5835	0.141993	0.0330565	0.706856	-0.520925	-0.059311	1.12184	0.701522	-0.389304	-0.712806
YGL237C	Hap2	S(52)	EKPIEMPLDMGKAPsPR	1	1.7557	1.27042	-0.577289	-0.437847	-0.419046	-0.453366	0.271895	-0.193772	-1.22264	-0.337565	0.19138	0.152126
YGL244W	Rtf1	Y(180);S(181)	HysDNEDEDDEEDYREEDYKDDEGSEYGDDEEYNPFDR	2	-0.30681	-0.236103	0.0730157	1.26057	0.0617263	-0.0746154	-0.417862	-0.353794	0.414283	-0.433914	0.175647	-0.16214
YGL244W	Rtf1	S(90)	YKDEsDREHLESLPEMER	1	-0.4322	-0.599217	-0.11215	-0.00818101	-0.105541	0.107558	-0.035346	-0.064481	0.240608	0.432743	0.444628	0.131578
YGL253W	Hxk2	S(385)	RLsELIGAR	1	-0.624864	-0.828227	-0.250836	-0.136096	0.33594	0.0335358	-0.0526921	-0.196748	0.972982	1.7199	-0.38053	-0.592369
YGL253W	Hxk2	S(15)	KGsMADVPKELMQQIENFEK	1	0.302798	0.128776	-1.10912	-0.772386	0.27784	0.447047	0.405562	-0.531855	-1.45237	-0.994982	1.5753	1.7234
YGR008C	Stf2	S(69)	DRRGsNLQSHEQK	1	-0.0338261	-0.45236	-0.441161	-0.270578	-0.8409	-0.449878	0.740005	0.454919	0.460215	0.746702	0.115668	-0.0288064
YGR008C	Stf2	S(73)	GSNLQsHEQK	1	-0.342536	-0.639367	-0.611937	-0.516797	-1.20859	-0.679212	0.777659	0.746235	1.37773	1.27748	0.00767073	-0.188336
YGR008C	Stf2	Y(25)	YFSHTGNyGESPNHIKK	1	-0.100919	-0.299307	-0.501795	-0.278186	-0.808701	-0.454635	1.11918	1.0774	0.33677	0.103811	-0.04453	-0.14908
YGR008C	Stf2	S(28)	YFSHTGNYGEsPNHIKK	1	-0.0817489	-0.11839	-0.7818	-0.121821	-0.929152	-0.314054	1.30385	0.8181	0.49014	-0.0114774	-0.0012866	-0.252358
YGR009C	Sec9	S(315)	QPQSQQAPMTYTPSFIASDEAARNsEVDLNEEPR	1	0.0290544	0.130859	-0.340187	-1.315	-0.189341	-0.364407	0.49398	1.24537	-0.0268349	-0.393348	0.0333288	0.696528
YGR010W	Nma2	S(85)	MDHIPLNTSDFQPLsR	1	0.0240042	0.129833	0.156002	-0.104794	-0.308849	-0.757985	-0.481524	0.0274612	0.119224	-0.234179	0.491142	0.939663
YGR023W	Mtl1	S(505);S(506)	HANVEGYDDDDDDDDDDANDENLssNFHNR	2	-0.448108	0.477857	0.0119182	-0.0690021	-0.63512	-0.217924	0.819564	-0.00019845	0.44771	0.0748508	-0.195964	-0.265583
YGR086C	Pil1	S(59)	KLsQLVK	1	-0.35399	-0.452894	-0.376733	-0.773015	-0.967	-0.725991	1.01693	1.07979	0.873261	1.36594	-0.192465	-0.493833
YGR086C	Pil1	S(163)	YKDPQsPK	1	0.683799	0.698456	-0.0506339	0.0688872	-0.481248	-0.261869	0.0597878	0.191265	0.0850204	-0.0261227	-0.296726	-0.670616
YGR090W	Utp22	S(10)	KAsETSDQNIVK	1	-1.13352	-1.70942	-0.245063	-0.366401	0.313323	0.602852	-0.359573	-0.249354	0.986446	1.1562	0.438385	0.566119
YGR093W	Drn1	S(242)	RPLETETENsFDGDKQVLANR	1	0.13724	0.265095	0.206112	0.206155	0.217152	0.03455	0.197699	0.335296	-0.630613	-0.600072	-0.12759	-0.241024
YGR097W	Ask10	S(1070)	GNNsAQNLTTSSSTASR	1	0.192211	0.314166	-0.911925	-0.792449	0.116251	-0.856802	0.97269	1.37285	-1.26412	-1.58002	0.894891	1.54225
YGR097W	Ask10	T(1053)	KTNSTGNVPCLtAEK	1	-0.197606	-0.377668	-0.248156	-0.314527	0.378016	-0.0302666	-0.0406628	0.240833	-0.418826	-0.153439	0.527234	0.635068
YGR100W	Mdr1	S(764)	AVDLAEEVNLIDLsDDEGEEKR	1	0.0380864	0.258813	-0.0133139	-0.291963	0.118904	-0.0648768	-0.353171	-0.247572	-0.0963736	-0.0180205	0.305868	0.363619
YGR116W	Spt6	S(148);S(155)	QDSTsKLEDFFsEDEEEEESGLR	2	0.091119	0.0476802	-0.456526	-0.620414	-0.0704844	0.174482	0.594316	0.506951	-0.042037	-0.0577013	-0.116387	-0.0509978
YGR116W	Spt6	S(148)	QDSTsKLEDFFSEDEEEEESGLR	1	0.0268528	0.345522	0.685372	-0.416457	0.0848116	0.671842	0.266292	0.255099	-0.00918477	0.206347	-1.05414	-1.06235
YGR116W	Spt6	S(155)	LEDFFsEDEEEEESGLR	1	0.571108	0.59644	-0.0630038	-0.217119	0.129997	-0.0409493	-0.860595	-0.760471	-0.238378	-0.168109	0.460871	0.590209
YGR116W	Spt6	S(94)	EEDDRLsEDDLDLLMENAGVER	1	0.113476	0.28932	0.0968159	0.0649212	0.0746455	-0.454986	-0.13104	0.0813824	-0.178289	-0.417926	0.0243915	0.437288
YGR116W	Spt6	S(206)	TADKGGILDELDDFIEDDEFsDEDDETR	1	0.600957	0.608466	-0.49071	0.494721	-0.0934449	-0.949289	0.0141338	-0.357194	-0.651186	-0.59372	0.620249	0.797016
YGR116W	Spt6	S(134);S(136)	RVGDEGNAAEsEsDNVAASR	2	-0.348395	-0.488154	-0.139977	0.0840908	-0.0110931	0.254752	0.332222	0.0020801	0.0379644	0.216448	0.129278	-0.0692178
YGR125W	Ygr125W	S(140)	TIEENIDEEYsDEYSR	1	0.288067	0.159481	0.405418	0.335032	0.12507	0.220344	-0.664781	-0.434195	0.239149	0.263389	-0.392923	-0.544051
YGR125W	Ygr125W	S(149)	LLLsPASSNVDDDRNR	1	0.790603	0.759589	0.176876	0.417276	-0.0951848	0.246089	-0.199436	-0.181952	-0.190345	-0.474568	-0.482514	-0.766434
YGR129W	Syf2	S(124);S(125)	QDssADEEDNKNVPK	2	-0.053042	0.321056	0.412112	0.148604	0.327822	0.609703	-0.449042	-1.10194	-0.0700438	-0.140128	-0.167806	0.162705
YGR130C	Ygr130C	S(255)	GTADsAQINVAEPISSENGVLEPR	1	0.134019	0.799836	-1.16334	-2.25096	-1.43782	-0.122555	1.65812	2.71555	1.3988	-0.835853	-0.589778	-0.306022
YGR130C	Ygr130C	S(44)	VVsNEPK	1	1.78888	1.22324	-0.24158	0.0450731	-0.64946	-0.268317	-0.332269	-0.151022	0.185076	0.386867	-0.75065	-1.23584
YGR130C	Ygr130C	S(326);S(327)	KEVEAEGDAEEETEQssAEESTER	2	-0.0843122	0.441782	0.695652	0.547187	0.0614658	0.312183	-0.4272	-0.787878	0.297687	-0.042628	-0.543293	-0.470646
YGR134W	Caf130	S(1121)	ADKPIPLHEYITLAELDVGDsE	1	0.466216	1.00475	-0.178066	-0.682988	-0.0607125	-0.784254	0.132354	0.671079	-0.889602	-0.990848	0.52981	0.782258
YGR145W	Enp2	S(671);S(672)	HDNssDEEGIDENGNK	2	-0.319507	-0.355449	0.0759205	0.347462	0.298055	0.421696	0.0236767	-0.0685661	0.150792	0.162734	-0.228937	-0.507876
YGR145W	Enp2	S(529)	ALTAAEEsDEER	1	0.0325944	-0.228396	0.0524686	0.168598	0.331167	0.113092	0.802868	0.80651	-0.994462	-0.475171	-0.224636	-0.384632
YGR148C	Rpl24B	S(86)	AQRPITGAsLDLIK	1	-0.271073	-0.550016	-0.0326674	-0.140853	0.126405	0.0863847	0.26427	0.39144	-0.0812846	0.313601	-0.00565014	-0.100557
YGR152C	Rsr1	S(192)	IESPsTR	1	-0.156319	-0.179646	0.201636	0.319376	0.411975	0.605702	-0.0963755	-0.33586	-0.142722	-0.219371	-0.218195	-0.190201
YGR162W	Tif4631	S(200)	ASSEENIsEAEK	1	-0.57608	-0.811349	-0.959452	-0.31032	-1.03503	-0.263113	1.99742	1.39269	1.04336	0.675814	-0.47022	-0.683726
YGR162W	Tif4631	S(553)	ERGsYR	1	-1.18769	-1.05553	-1.00093	-1.16632	0.15864	0.126874	0.918688	1.01936	0.425206	0.813342	0.68609	0.262278
YGR162W	Tif4631	Y(554)	ERGSyRNEEK	1	-1.09734	-0.953478	-0.815479	-0.433236	0.0957102	0.118565	1.10228	0.633538	0.199076	0.501794	0.515761	0.132817
YGR162W	Tif4631	S(502);S(503)	FGNNssRGHDFR	2	-0.462123	-0.631413	-0.276359	-0.0630906	-0.0519354	-0.074981	1.06853	0.762411	0.00679538	0.306968	-0.284912	-0.299894
YGR162W	Tif4631	S(168)	STVSPQPEsK	1	-0.139688	-0.435654	-0.333793	-0.140582	-0.101009	0.062134	1.56533	1.28556	-0.0854646	0.375575	-0.905376	-1.14703
YGR162W	Tif4631	S(916);S(920)	TYsQRNsQR	2	-1.84483	-1.86935	-1.77056	-1.98381	-0.102492	-0.595855	2.47642	2.16163	0.0535369	1.21919	1.18792	1.0682
YGR162W	Tif4631	T(914);S(920)	tYSQRNsQR	2	-1.16938	0.530883	-0.711214	-1.51342	-0.093428	-1.27194	1.66818	1.3366	-0.129121	0.500379	0.434966	0.417502
YGR167W	Clc1	T(49)	EAEILGDEFKTEQDDILEtEASPAKDDDEIR	1	0.190378	0.640687	-0.219933	-0.239957	-0.347196	-0.836857	-0.0419222	0.112897	0.616264	0.502576	-0.197591	-0.179345
YGR167W	Clc1	S(52)	TEQDDILETEAsPAKDDDEIR	1	-0.827913	-0.253337	0.457579	-0.238417	-0.0998289	0.433322	-0.507468	-0.415982	1.54835	1.34766	-0.570717	-0.873252
YGR178C	Pbp1	T(150)	AQETtPAR	1	-0.283732	-0.322924	0.0146595	0.00148314	-0.0324026	0.320765	0.434267	0.590154	-0.0487548	-0.145006	-0.0840369	-0.444473
YGR178C	Pbp1	S(106)	VADSGVSDsVDDLAK	1	-0.327599	-0.721205	-0.667396	-1.04309	-0.976235	-0.604745	1.16201	1.02983	0.43794	0.925199	0.371279	0.41401
YGR179C	Okp1	S(70)	KSLFYENsDDAEEGEIEER	1	0.176057	0.153505	0.162925	0.0712751	0.0737183	0.0981132	-0.251951	-0.257654	-0.0560994	0.0277099	-0.10465	-0.0929491
YGR184C	Ubr1	S(1938);S(1944)	NLDEDDsDDNDDsDEREIW	2	0.193965	0.209835	0.0776919	-0.0600837	0.284892	0.275373	-0.256067	-0.477933	-0.232672	0.0204415	-0.0678098	0.0323675
YGR184C	Ubr1	S(296);S(300);S(302)	TSPSNsPEAsPsLAK	3	0.272531	0.779028	0.0391418	0.024189	0.00730855	0.0832694	-0.340712	-0.832504	0.0940121	-0.0372265	-0.0722813	-0.016756
YGR186W	Tfg1	S(515)	DEEAPsENEEDELFGEK	1	0.133265	0.404314	0.0172014	-0.454105	-0.167303	-0.2652	0.186893	0.319141	0.0244838	-0.127146	-0.19454	0.122996
YGR196C	Fyv8	S(163)	AVNEDLDNLIEQIsR	1	0.121834	-0.195337	-0.551272	-0.532995	-0.469281	-0.57636	0.258357	0.395385	0.303433	0.475456	0.33693	0.433851
YGR196C	Fyv8	T(167)	EMtPEIR	1	0.230861	0.0405014	0.0462792	-0.00307709	0.0175655	0.0426869	-0.324471	-0.326088	-0.0687274	0.123664	0.0984928	0.122312
YGR211W	Zpr1	S(23)	EDLFKPVGEAAAEVEDEsIAEQNK	1	-0.213411	-0.588579	-0.950767	-0.783974	-0.404105	-0.422428	1.61626	1.68919	0.16313	0.511504	-0.211107	-0.405708
YGR217W	Cch1	S(159)	RVsNSPSSTDRPPR	1	0.156313	0.220185	0.51517	0.422608	0.113808	0.488866	-0.185796	-0.813416	-0.537937	-0.272398	-0.0615579	-0.045845
YGR217W	Cch1	S(122)	RNVsPSTK	1	-0.378303	0.0112231	0.0625611	0.283084	0.227803	0.0346657	-0.149874	-0.329085	-0.109695	-0.0686265	0.347508	0.068739
YGR217W	Cch1	S(161)	RVSNsPSSTDRPPR	1	0.211746	0.422711	0.645775	0.80778	0.173442	0.59668	-0.371156	-0.869545	-0.379461	-0.243605	-0.280346	-0.714022
YGR237C	Ygr237C	S(712)	SAGLsPR	1	0.0165703	0.265672	0.389839	0.232021	-0.340228	-0.0268377	-0.391225	-0.677304	0.419376	0.375303	-0.0943329	-0.168854
YGR240C	Pfk1	S(188);S(189)	AssDASDLLR	2	-0.294054	-0.0291662	0.0642407	0.410211	0.0134084	0.817753	-0.461811	-0.790727	0.862983	0.238621	-0.184767	-0.646693
YGR240C	Pfk1	T(898)	KNEASPNtDAK	1	-0.0204993	-0.200686	-0.28384	0.18893	0.0493503	0.355761	0.291549	-0.0888397	0.325382	0.0929046	-0.361942	-0.348069
YGR240C	Pfk1	S(185);S(188)	DAFLEATSEDEIIsRAsSDASDLLR	2	0.00807934	0.0421545	-0.570617	-0.338999	-0.633997	-0.758105	1.091	0.992886	-0.217531	-0.390193	0.323067	0.452257
YGR240C	Pfk1	S(185)	DAFLEATSEDEIIsR	1	-0.512073	-0.276566	-0.628885	-0.869818	-0.559738	-0.820057	0.764899	0.906056	0.335222	0.192358	0.600575	0.868028
YGR240C	Pfk1	S(188)	AsSDASDLLR	1	0.0403315	0.421811	0.127869	-0.316519	-0.299891	-0.283219	-0.270951	0.016146	0.345661	0.0435444	0.0569808	0.118237
YGR240C	Pfk1	S(189)	ASsDASDLLR	1	0.125376	0.32006	0.0516425	-0.114751	0.039413	0.117559	-0.258799	-0.122484	0.0828133	-0.16618	-0.0404453	-0.0342035
YGR240C	Pfk1	S(179)	DAFLEATsEDEIISR	1	0.37923	0.545776	-0.283972	-0.466657	0.0288203	-0.122734	-0.489712	-0.446306	0.134435	-0.00505082	0.231199	0.494972
YGR245C	Sda1	S(278)	EENFEENsEDEDGFDLDALR	1	-0.507341	-0.390719	0.627469	0.260015	0.546958	0.458196	-0.162671	0.170138	-0.021995	0.123668	-0.48242	-0.621298
YGR246C	Brf1	S(371)	ATNGIDGENIYHEDsENETR	1	-0.662101	-0.61047	0.36422	0.25174	0.0943498	0.330917	-0.472596	-0.517526	0.163362	0.0823002	0.512765	0.463038
YGR250C	Rie1	S(645)	GNLSSsDDDDQSQTDK	1	-0.025042	0.048533	-0.276705	-0.415289	-0.234312	-0.113457	0.0883381	0.0116964	0.667479	0.886261	-0.219758	-0.417744
YGR250C	Rie1	S(501)	MDLFYPQREsFSEGR	1	-0.388385	-0.225145	-0.471072	-0.66274	-0.0594195	-0.721164	-0.266202	0.0414139	0.765122	0.621223	0.419956	0.946413
YGR253C	Pup2	S(260)	EAAESPEEADVEMs	1	-0.100599	-0.280844	0.219421	0.572655	0.0623509	0.292186	0.0430594	-0.507128	-0.0931792	0.0679644	-0.131053	-0.144834
YGR254W	Eno1	S(14)	SVYDsR	1	-0.697241	-0.586192	0.00181166	0.318429	0.2065	0.312922	-0.144473	-0.452712	0.578176	0.250669	0.0552257	0.156884
YGR258C	Rad2	S(367)	SEDEGCDsDECEWEEVELKPK	1	0.631363	0.364202	-0.0891181	-0.433704	-0.41648	-0.0442483	0.0800389	0.347442	-0.0653932	0.128399	-0.14041	-0.36209
YGR260W	Tna1	S(45)	HLVDDVLFISPTNDGSEEKPTEVTFQEDEGHDAsLHNR	1	0.462183	0.0431079	-0.23755	0.0759997	-0.531533	-0.645987	-0.0386321	-0.352084	-0.0224086	0.0558608	0.367941	0.823102
YGR267C	Fol2	Y(25)	HETPLNIRPTSPyTLNPPVER	1	0.181257	0.248418	-0.210668	-0.245534	-0.340144	-0.4369	0.294852	0.120169	0.372175	0.478394	-0.297472	-0.164547
YGR267C	Fol2	T(15);S(23)	HEtPLNIRPTsPYTLNPPVER	2	-0.680519	-0.406014	-0.531827	-0.41501	-0.740976	-0.226784	0.650323	0.640387	1.51277	1.22095	-0.209773	-0.813525
YGR267C	Fol2	S(23)	HETPLNIRPTsPYTLNPPVER	1	0.0146424	-0.0673606	-0.136949	0.622383	-0.278332	-0.516899	0.127284	0.328967	0.226516	-0.0814919	0.0468384	-0.285598
YGR270W	Yta7	S(259)	ELQEDsPIR	1	0.053404	-0.122915	0.404727	0.338512	0.388413	0.496242	-0.241179	-0.207365	-0.155671	0.168369	-0.449695	-0.672844
YGR270W	Yta7	S(94)	GDDEDDDVDLVsPHENAR	1	-0.306646	-0.27272	0.313934	0.474197	0.0867211	0.438233	-0.298623	-0.328997	0.451466	0.230349	-0.246852	-0.541062
YGR270W	Yta7	T(212)	HPEtPPPVR	1	0.0733418	0.0392593	-0.0365829	0.66788	0.331716	0.337962	-0.124682	-0.32412	0.160145	-0.0466599	-0.403937	-0.674321
YGR272C / YGR271C-A	Ygr272C / Efg1	S(193);S(211)	KLDEDsIGLTLSPDKDHEDGSQVsPTQDR	2	-1.00193	-0.454452	-0.086113	-0.0462389	0.0179872	-0.191597	0.30019	0.223509	0.547638	0.803242	0.222228	-0.334463
YGR280C	Pxr1	S(159)	EGDDsEDEDDDDKEDKESDK	1	-1.0103	-0.817231	0.700648	0.739346	0.395211	0.828124	-0.299128	-0.163562	0.494444	0.184802	-0.280872	-0.771479
YGR280C	Pxr1	S(230)	SSEsASNIPDAVNTR	1	-1.50998	-1.54097	-0.127097	-0.123487	0.175805	0.366324	1.10737	0.919519	0.49512	0.815499	-0.14121	-0.436886
YGR285C	Zuo1	S(50)	NHTWsEFER	1	-0.897439	-0.38146	0.0639783	0.154867	-0.108964	0.595877	-1.17287	-1.4428	0.506479	-0.0226427	1.60882	1.09616
YHL002W	Hse1	S(162)	HNMSTQADNsDDEELQK	1	-0.125607	-0.185902	0.103728	0.650381	0.225329	0.345788	-0.163659	-0.340721	-0.00780122	-0.244399	-0.0319893	-0.225147
YHL007C	Ste20	T(511)	QTHAPtTPNK	1	-0.352054	-0.32066	0.354814	0.499084	0.499	0.756019	-0.15438	-0.367067	-0.119281	-0.248633	-0.228099	-0.318744
YHL007C	Ste20	T(516);S(517)	QTHAPTTPNKtsPNR	2	-0.217759	-0.147892	0.788514	0.457542	0.810189	1.00002	-0.337418	-0.265136	-0.590494	-0.49244	-0.453032	-0.552099
YHL007C	Ste20	S(289)	sGSNSGTLR	1	-0.536196	-0.528302	0.353322	0.1743	0.321756	0.453954	-0.132109	0.128476	-0.0620832	-0.164988	0.0553108	-0.0634397
YHL007C	Ste20	T(933)	TNSCDDNNDSKETVNLDVtEDDKQK	1	-0.126981	-0.197751	0.0257091	0.0436933	0.48449	0.333784	-0.647062	-0.727536	-0.0248864	0.111835	0.288731	0.435975
YHL008C	Yhl008C	S(309)	NECEEDIKDEVsDDDATETGGDVEDLTEK	1	0.42558	1.40253	1.92139	1.52046	1.3277	2.13399	-0.700116	-1.27532	-0.727733	-0.814654	-2.24682	-2.96701
YHL023C	Npr3	T(459)	SSStTTNISR	1	-0.0150932	-0.176979	0.196117	0.781186	0.260257	0.344095	-0.434612	-0.854835	-0.239015	-0.223187	0.232347	0.12972
YHL023C	Npr3	S(456)	sSSTTTNISR	1	0.0205047	0.0525898	0.60265	0.896595	0.300511	0.0775844	-0.312498	-0.452872	-0.415291	-0.252755	-0.195877	-0.321142
YHL023C	Npr3	S(987)	RPsMDYK	1	-0.166362	-0.087548	0.374611	0.161236	0.0572163	0.199058	-0.365603	-0.3014	0.113617	0.08906	-0.0134792	-0.0604064
YHL023C	Npr3	T(267)	tHSPVRK	1	-0.0407491	0.222262	0.123035	0.784916	0.0765172	0.315699	-0.18716	-0.353129	0.107824	-0.336223	-0.0794671	-0.633525
YHL032C	Gut1	S(96)	RPsTAPAR	1	0.273578	-0.139652	0.0768666	0.353481	-0.0833893	0.15254	-1.27255	-1.45622	0.71251	0.721109	0.292981	0.368738
YHL034C	Sbp1	S(289)	ELTVDVAVIRPENDEEEIEQETGsEEKQE	1	0.489295	0.264465	-0.806154	-1.18284	-0.972929	-0.676267	1.57222	1.6165	-0.876263	-1.11042	0.593833	1.08855
YHR005C	Gpa1	S(199)	DAETVTQNEDVDRNNsSR	1	-0.445545	-0.657641	0.0354938	0.409428	0.00968811	-0.0142059	0.300658	-0.0356317	-0.116125	0.0520136	0.215831	0.246037
YHR009C	Tda3	S(204)	SHTNsASDLDSVSPAEQLR	1	0.0485883	0.0954264	0.175043	0.300891	0.150526	0.367046	-0.390969	-0.707987	-0.0319269	-0.379692	0.0487387	0.324315
YHR010W / YDR471W	Rpl27A / Rpl27B	S(97)	SVVsTETFEQPSQR	1	-0.274459	-0.926124	-0.231785	0.0231453	-0.279432	-0.185222	0.593546	0.582476	0.467041	1.15219	-0.274911	-0.646467
YHR010W / YDR471W	Rpl27A / Rpl27B	T(98)	SVVStETFEQPSQR	1	-0.160739	-0.436828	-0.353736	0.0693342	-0.370425	-0.00345315	0.78842	0.605953	0.384079	0.503912	-0.287598	-0.738918
YHR016C	Ysc84	S(274)	GMsLGSR	1	-0.695855	-0.329176	0.0921077	0.0791778	-0.0344107	0.151736	-0.412529	-0.507319	0.773693	0.49278	0.276995	0.112801
YHR016C	Ysc84	S(301)	GYGDFDsEDEDYDYGR	1	0.35325	0.345703	0.35261	0.0108261	-0.20727	-0.0230249	-0.282886	-0.19644	0.645167	0.60305	-0.86087	-0.740115
YHR016C	Ysc84	Y(308)	GYGDFDSEDEDYDyGRSPNR	1	0.0681674	0.154475	0.481512	0.252559	-0.125675	-0.0356737	-0.222569	-0.199343	0.146443	0.152258	-0.347879	-0.324275
YHR027C	Rpn1	S(182)	DAEDETSSDGsK	1	-0.973835	-0.503317	0.584156	0.298437	0.274953	0.696446	-0.380844	0.233504	0.929299	0.326976	-0.433729	-1.05205
YHR027C	Rpn1	S(16)	QQTIDEQsQISPEK	1	-0.565132	-0.828264	0.0839646	-0.267799	-0.0258915	0.315536	-0.113719	0.00982697	0.587884	0.80296	0.0328937	-0.0322598
YHR032W	Erc1	S(72)	EGEYHsLLDANNSR	1	-0.429129	-0.191871	0.0736028	0.104543	-0.212959	0.0294703	0.115095	-0.0548967	0.390093	0.189913	0.0632971	-0.0771592
YHR052W	Cic1	S(368)	ESSEsEAVK	1	-0.892211	-0.90692	0.0245475	0.247508	-0.0918816	0.491403	0.225646	0.242723	1.07052	0.757093	-0.336619	-0.831808
YHR052W	Cic1	S(366)	SSSELEKESsESEAVKK	1	0.0466576	-0.169139	-0.395205	-0.0713748	0.0300473	0.104624	0.190337	0.172589	-0.0922658	0.0462489	0.220429	-0.0829482
YHR053C / YHR055C / GTK30H01110 / GTK30H01120 / GTK30H01130 / GTK30H01140	Cup1-1 / Cup1-2 / GTK30H01110 / GTK30H01120 / GTK30H01130 / GTK30H01140	S(31)	sCSCPTGCNSDDKCPCGNK	1	-1.53432	-1.63221	-0.612159	-0.18381	-0.884302	-0.102724	2.38935	1.87091	1.4134	0.986185	-0.771973	-0.938353
YHR056C	Rsc30	S(157)	SDSPDVPsMDQIR	1	0.26429	0.130805	0.200405	-0.032089	-0.269877	0.0251862	0.0461528	-0.00596049	0.0370649	0.246584	-0.278036	-0.364526
YHR056C	Rsc30	S(152)	SDsPDVPSMDQIR	1	-0.00876374	0.156313	0.337516	0.0494081	0.0509561	0.104304	-0.255052	-0.207321	0.0195276	0.0763195	-0.144184	-0.179024
YHR058C	Med6	S(225)	VPTDTSTTATAATNGNNAGGGsNK	1	-0.131026	0.86355	-0.749228	-1.11801	-0.329122	-1.20655	0.597028	1.51157	-0.143556	-1.51872	0.755903	1.46817
YHR064C	Ssz1	S(511)	EENAEEDDEsEWSDDEPEVVR	1	0.292236	0.199424	-0.184166	-0.47018	0.172996	0.402317	0.670332	0.661906	-0.51692	-0.156829	-0.434477	-0.636639
YHR064C	Ssz1	S(511);S(514)	EENAEEDDEsEWsDDEPEVVR	2	-0.170954	-0.342034	-0.323509	-0.172396	0.00563396	0.0622506	0.239764	0.103465	0.0729211	0.303613	0.176144	0.0451006
YHR064C	Ssz1	S(514)	EENAEEDDESEWsDDEPEVVR	1	0.107975	0.240229	0.210205	0.17597	0.361398	0.721637	-0.145602	-0.457237	-0.17479	-0.173544	-0.359185	-0.507055
YHR066W	Ssf1	T(301)	EKEtEEEEDVEMEEPKPSENLQPTPR	1	-0.521278	-0.693769	-0.55279	-0.446356	-0.0757794	0.0409793	0.404148	0.369587	0.62599	0.971599	0.11971	-0.242041
YHR066W	Ssf1	S(256)	EDISSLILDHDLGAYTsESEIEDDAIVR	1	0.00600466	0.485997	0.287471	0.103813	0.0176707	-0.51801	0.0332157	0.400144	-0.229698	-0.640046	-0.114664	0.1681
YHR082C	Ksp1	S(973)	MEGGDNESSSTsPDER	1	0.533864	0.924547	0.602317	0.528527	0.709488	0.830577	-1.13585	-1.36726	-0.0295812	-0.204723	-0.680239	-0.71167
YHR082C	Ksp1	S(827)	RLsMEQK	1	-0.370686	-0.772893	-0.18711	0.302889	0.0845163	0.302901	0.0151941	-0.743887	0.351566	0.599954	0.106519	0.311036
YHR082C	Ksp1	S(416)	KRsDVSQNQNVANGFFK	1	-0.569693	-0.639796	-0.0500548	-0.586741	0.199708	0.0047022	-0.502775	-0.0948748	0.437247	0.172021	0.485568	1.14469
YHR082C	Ksp1	S(646)	NHHVsPTNQFLR	1	0.131053	-0.242697	0.0898745	0.445267	-0.0329747	0.149588	-0.114556	-0.533292	-0.00277616	0.104006	-0.0706201	0.0771265
YHR084W	Ste12	S(226)	SDNsPPKLESENFK	1	-0.382167	-0.156024	0.697867	0.461548	0.179839	0.281953	-0.573927	-0.485525	0.245812	0.14698	-0.167424	-0.248931
YHR097C	Yhr097C	S(233)	ANSSTTTLDAIKPNsK	1	-0.363102	-0.336749	-0.4362	-0.280385	-0.344547	0.0486821	1.40494	1.76137	0.037018	-0.425645	-0.298108	-0.767275
YHR097C	Yhr097C	T(313)	tHSGHLEQK	1	-0.650283	-0.374859	-0.384058	-0.446788	-0.811873	-0.205917	1.45018	1.61444	0.91782	0.741875	-0.521788	-1.32875
YHR097C	Yhr097C	T(76)	LPSYEEAAGtPK	1	-0.0823404	-0.204423	-0.408706	-0.303913	-0.383765	-0.213636	0.316724	0.364268	0.95347	1.09083	-0.395383	-0.733124
YHR097C	Yhr097C	S(25)	TIGGPQNGVNTVINPFRVsPSEDRVPSR	1	0.0660886	0.548258	0.214764	-0.0182526	0.202633	-0.2864	-0.136176	0.575604	-0.116587	-0.646176	-0.230723	-0.173034
YHR097C	Yhr097C	S(33)	VSPSEDRVPsRDETPR	1	-0.0760539	-0.306639	-0.364043	0.382606	-0.264563	-0.00711444	1.23619	0.734916	-0.0763696	-0.391436	-0.455158	-0.412332
YHR098C	Sfb3	T(72)	AYHNFSSGTVPTLGNSPYTTPQLNQQDGFQQPQAFtPK	1	0.571661	0.777673	-1.08928	-0.765215	-0.539804	-0.99672	0.818038	1.37654	-0.112845	-1.13468	0.352226	0.742395
YHR098C	Sfb3	S(101)	FGAsEASSPYGQSMLDMTAPQPTSHIVPTQR	1	0.31717	1.18316	-0.434133	0.108381	0.11227	-0.929288	0.440769	0.50612	-0.370859	-0.890387	-0.0652167	0.0220106
YHR098C	Sfb3	S(83)	QFGGFNNGsGSVMSTPVMVSQER	1	-0.120575	0.191694	-1.09442	-1.08304	-0.985457	-0.383075	2.04133	1.37486	0.0310388	-0.269502	0.128083	0.169069
YHR099W	Tra1	S(186)	AEQGDLDSPKEPQADELLDEFsK	1	-0.298816	-0.139134	0.518442	-0.0428508	0.229395	0.329905	-0.430651	-0.0375042	0.230503	0.145076	-0.248874	-0.255492
YHR099W	Tra1	S(542)	KEDINDsPDVEMTESDNVVK	1	-0.507956	-0.163059	-0.0502459	-0.584831	-0.424097	-0.518945	0.042508	0.609659	0.719064	0.3673	0.220727	0.289877
YHR102W	Kic1	S(723)	AsSPSRPLFGVGTSPNR	1	0.11022	0.234162	0.109115	0.233709	-0.0307187	0.0354101	-0.226517	-0.283461	0.0468811	-0.0306566	-0.00897967	-0.189164
YHR114W	Bzz1	S(472)	LGSAPNNAGEDsDNNSIR	1	0.235661	0.567726	0.874993	0.332752	0.332875	0.786046	-0.350165	-0.526474	-0.760497	-0.823474	-0.332868	-0.336575
YHR114W	Bzz1	S(476)	LGSAPNNAGEDSDNNsIR	1	-0.324143	-0.185635	0.280949	0.175532	-0.0654383	-0.0546966	-0.0809825	-0.473411	-0.0108015	0.203652	0.200417	0.334558
YHR114W	Bzz1	S(472);S(476)	LGSAPNNAGEDsDNNsIR	2	-0.109032	-0.0301051	0.0149263	0.326788	0.588243	0.54613	0.124515	-0.109942	-0.683378	-0.791988	0.0647248	0.0591161
YHR114W	Bzz1	S(463)	LGsAPNNAGEDSDNNSIR	1	-0.673664	-0.781886	-0.00535779	0.265944	-0.0257644	0.229232	-0.64946	-1.118	0.754791	0.751353	0.599455	0.653357
YHR118C	Orc6	T(114);S(116)	QFAWtPsPK	2	-0.0284858	-0.0668721	0.239629	0.342343	0.583771	0.0711406	-0.0466107	0.13875	-0.506204	-0.237149	-0.2421	-0.248212
YHR127W	Yhr127W	S(96)	DINSsPDWGNAHR	1	0.0683723	0.0131554	0.0100814	0.106884	-0.0670364	0.0374843	0.227062	-0.0672804	-0.125607	0.00773526	-0.112872	-0.0979784
YHR132W-A	Igo2	S(106);S(109)	MsSSsGGDSISR	2	-0.450617	-0.587545	0.264648	0.249546	0.755859	0.560696	-1.01802	-0.706123	0.382343	0.629239	0.0657906	-0.145813
YHR132W-A	Igo2	S(113)	RMSSSSGGDsISR	1	0.0063566	-0.151614	-0.445034	0.383057	0.28549	0.105677	-0.115744	-0.375516	0.325734	0.165798	-0.0568029	-0.127402
YHR132W-A	Igo2	Y(66)	QYFDSGDyALKK	1	2.8133	2.12677	-0.472902	-0.226201	-1.16834	-1.25415	0.256223	0.489758	-0.921234	-0.57401	-0.507051	-0.562162
YHR132W-A	Igo2	S(119)	QGsISSGPPPR	1	-0.574587	-1.12572	-0.350595	0.892286	-0.375854	-0.287846	0.108728	-0.433542	0.786699	0.664424	0.405609	0.290401
YHR132W-A	Igo2	S(106);S(115)	RMsSSSGGDSIsR	2	-0.854306	-0.564971	-0.23759	0.470857	-0.240599	0.0793189	0.280571	-0.257323	0.654329	0.314732	0.397595	-0.0426146
YHR135C	Yck1	S(39)	QLHHQAVDsPAR	1	-0.138229	-0.179736	0.294416	0.843031	0.322202	0.126206	0.151661	0.180688	-0.460669	-0.539433	-0.169381	-0.430755
YHR135C	Yck1	S(522);S(523);S(527)	TPEQHPNDDNssLAAsHK	3	-0.0160004	-0.090732	-0.215766	0.350753	0.042543	0.58505	0.373602	-0.668157	-0.494864	-0.265059	0.310486	0.0881446
YHR146W	Crp1	S(390);S(394)	LPLTDEQTAEGRKsPAVsEEKEK	2	0.335798	0.293099	-0.165782	-1.7358	-0.760941	-1.2827	0.741093	0.928072	-0.391529	0.670107	0.241361	1.12722
YHR146W	Crp1	S(332);S(335)	VEPVEGsLQsK	2	-0.662659	-0.943441	-0.824638	-0.242713	-0.467344	-0.585246	0.980334	0.520032	0.334549	0.748982	0.639758	0.502386
YHR149C	Skg6	S(251)	SHGsPIHNNQLSR	1	-0.285644	0.209263	0.244766	0.902281	0.132407	0.284156	-0.368742	-0.0947254	-0.174312	-0.834671	0.451525	-0.466304
YHR154W	Rtt107	S(540)	KDGTPISSFENsIDEK	1	0.595995	0.994571	-0.258194	-0.539525	-0.31739	-0.652053	0.206598	0.665799	-0.176784	-0.373217	-0.0502245	-0.0955752
YHR158C	Kel1	S(613)	NNsPILETLPSNEVK	1	0.115567	0.335269	0.262419	-0.262389	-0.0357585	0.208001	-0.255988	-0.417442	0.255563	0.447118	-0.341802	-0.310557
YHR158C	Kel1	S(848)	CEILEADNHsLEDKVNELEELVNCK	1	0.0919333	0.566551	-0.315836	-0.408891	-0.0697859	-0.888395	0.195446	0.151645	-0.247642	-0.547235	0.345885	1.12633
YHR158C	Kel1	S(23)	TPSDAsISDQSR	1	-0.499703	-0.864005	-0.12131	0.565446	-0.145865	0.00255334	0.11301	-0.259479	0.0119275	0.024993	0.64194	0.530492
YHR158C	Kel1	S(23);S(25)	TPSDAsIsDQSR	2	-0.171525	-0.141099	0.457729	0.535023	0.190303	-0.137934	0.213044	0.215998	-0.179261	-0.207443	-0.51029	-0.264546
YHR158C	Kel1	S(20)	TPsDASISDQSR	1	0.0917134	0.351848	0.811364	0.938382	0.716476	0.827826	-1.15148	-1.48361	0.00156244	-0.334216	-0.469632	-0.300232
YHR158C	Kel1	S(67)	TSsPPMFAR	1	0.0482174	0.153153	0.34713	0.324416	0.0310074	0.175515	-0.343608	-0.547916	-0.00352415	-0.047768	-0.0792235	-0.0574
YHR159W	Tda11	S(247)	AFsPVYQNIPLESR	1	0.691885	0.88933	0.0697814	-0.409508	-0.389701	-0.76971	-0.00131494	0.622099	-0.166907	-0.231168	-0.203744	-0.101044
YHR159W	Tda11	S(289)	SVsPQDIQER	1	-0.507188	-0.578232	0.138762	0.314785	-0.0330257	0.377878	-0.136189	-0.461548	0.0829448	-0.00704707	0.454696	0.354164
YHR159W	Tda11	S(372)	QKsPSQGSVSR	1	0.443619	0.533841	0.366493	0.43075	0.0722444	0.230338	-0.302459	-0.40397	-0.206359	-0.372664	-0.373538	-0.418295
YHR195W	Nvj1	S(190)	sENALNQVGSEDLLGCHLEK	1	-0.204883	-0.0486833	-0.412124	-0.666238	-0.550209	-0.659133	0.59246	1.01058	0.621638	0.607494	-0.0468801	-0.244019
YHR195W	Nvj1	T(251)	EStAEPDSLSR	1	0.161954	0.24262	-0.313161	-0.195895	-0.408423	-0.324187	0.333731	-0.0213905	0.152039	0.373036	0.0738596	-0.0741834
YIL003W	Cfd1	S(291)	HEQPQIEsPK	1	-0.283667	-0.159789	0.390335	0.282289	0.154074	0.349978	-0.258866	-0.622467	0.141789	0.0976568	-0.143664	0.0523325
YIL018W / YFR031C-A	Rpl2B / Rpl2A	S(114)	KASLNVGNVLPLGSVPEGTIVsNVEEKPGDR	1	-0.330568	0.0514617	-0.59533	-0.330862	0.19199	-0.684236	0.855359	1.25682	0.00369205	-0.762331	-0.125143	0.469152
YIL033C	Bcy1	S(70);S(74);S(77)	NIVLFPEPEESFsRPQsAQsQSR	3	-0.363143	0.0260703	-0.549625	-0.25756	-0.687927	-0.483901	1.45021	0.593958	0.359473	0.215868	-0.208988	-0.0944352
YIL033C	Bcy1	S(68);S(77)	NIVLFPEPEEsFSRPQSAQsQSR	2	-0.117258	-0.573826	-0.684553	-0.939533	-0.348564	-0.38352	1.33957	1.38483	0.314344	0.84577	-0.503542	-0.333725
YIL033C	Bcy1	S(74);S(77)	NIVLFPEPEESFSRPQsAQsQSR	2	-0.983663	-0.0259002	-0.425186	-1.52359	-0.841743	-0.693407	1.89653	1.54636	0.818475	1.08792	-0.464414	-0.391385
YIL033C	Bcy1	S(77)	NIVLFPEPEESFSRPQSAQsQSR	1	0.283654	0.316055	-1.33619	-2.09197	-2.13877	-1.06456	2.00479	1.88508	1.18822	0.680067	-0.00170899	0.275332
YIL033C	Bcy1	T(160)	RTSVSGETLQPNNFDDWtPDHYK	1	-0.140463	0.309613	-0.375609	-0.548547	-0.353373	-1.01125	-0.0246694	0.541593	0.416891	-0.207749	0.477223	0.916336
YIL033C	Bcy1	T(129);T(131)	EKtStPPLPMHFNAQR	2	0.243252	1.26817	-0.33338	-1.03999	-0.630405	-1.02306	0.274003	0.822243	0.373377	-0.510159	0.073153	0.482797
YIL033C	Bcy1	S(130);T(131)	EKTstPPLPMHFNAQR	2	0.367122	0.734618	-0.671749	-0.550263	-0.452393	-0.364325	0.360537	0.326469	0.109042	-0.462522	0.287441	0.316024
YIL033C	Bcy1	T(131)	EKTStPPLPMHFNAQR	1	0.405927	0.498535	-0.488588	-0.182075	-0.603596	-0.365051	0.365105	0.469525	0.00865644	-0.627819	0.312496	0.206885
YIL033C	Bcy1	S(79)	NIVLFPEPEESFSRPQSAQSQsR	1	-1.04984	-0.832801	-1.01505	-0.681231	-0.549727	-0.59216	-0.284482	-0.599009	1.32767	0.952488	1.57143	1.75271
YIL036W	Cst6	S(558);T(560)	FGsDtDDDDIDLKPVEGGK	2	-0.53064	-0.0549169	0.466978	0.22864	-0.0357369	0.365861	-0.743419	-0.745274	0.775916	0.444028	0.0669014	-0.238339
YIL038C	Not3	S(450)	IGsALNTPK	1	-0.393752	0.400697	-0.166996	0.130364	-0.0164749	-0.067302	-0.12028	-0.264228	0.0976202	-0.557591	0.599882	0.35806
YIL038C	Not3	S(446)	TPTTAAATTTSSNANsR	1	-0.280283	-0.287146	-0.0106733	0.527249	0.0912313	0.0761755	0.26321	0.214708	-0.675552	-1.14022	0.612067	0.60923
YIL038C	Not3	S(441);S(442)	TPTTAAATTTssNANSR	2	-0.13453	-0.48359	-0.119408	0.851965	-0.364537	0.161155	0.621408	0.0814392	-0.129776	-0.303782	0.126844	-0.307187
YIL041W	Gvp36	S(146)	VALNSsECLNK	1	-0.358889	-0.232759	-0.40515	-0.126602	0.231084	0.123978	0.372125	0.282172	0.708676	0.906692	-0.547846	-0.953482
YIL045W	Pig2	S(296)	FKLSDDDsDIENDNDSDDAINR	1	-0.764843	-0.616891	-0.442054	-0.49848	-1.07389	-0.892786	0.474705	0.342679	1.83231	1.96314	-0.0262187	-0.297658
YIL045W	Pig2	S(304)	LSDDDSDIENDNDsDDAINR	1	-0.95086	-0.0376532	1.07957	0.663064	-0.498117	-0.589933	-0.565614	-0.339353	1.58744	1.19516	-0.652415	-0.891287
YIL045W	Pig2	S(63)	RLsNVK	1	-1.03679	-1.13371	-0.401556	-0.609124	-0.884049	-1.11542	0.0287221	0.288118	2.38322	2.65742	-0.089551	-0.0872807
YIL047C	Syg1	S(172);S(175)	VNsIDsDSR	2	-0.435263	-0.505624	0.485113	0.586545	0.411489	0.553901	-0.367264	-0.522348	0.131929	-0.155427	-0.226004	0.0429528
YIL078W	Ths1	S(289)	NSsCYFLGDATNDSLQR	1	-0.734931	-1.07442	-0.880072	-0.825877	-1.24274	-0.568035	1.42757	1.31319	1.66486	1.70419	-0.234691	-0.549046
YIL078W	Ths1	S(195)	DISEsPER	1	0.020124	-0.224322	0.349829	0.624472	0.257904	0.531178	-0.205027	-0.315856	-0.0785398	-0.0993429	-0.34429	-0.516129
YIL084C	Sds3	S(179)	DTANEsATDTGAGNDR	1	-0.533766	-0.511457	-0.032983	-0.426908	-0.248568	-0.00854891	-0.125638	0.210973	0.908854	0.788111	0.0321004	-0.0521698
YIL084C	Sds3	T(181)	DTANESAtDTGAGNDRR	1	-0.200614	-0.503394	-0.425553	-0.19539	-0.459166	-0.419038	0.121158	0.199187	0.631685	0.620769	0.332491	0.297866
YIL095W	Prk1	S(564)	SAsFDNNNVNGNGNNTNR	1	-0.265972	-0.0286256	0.303345	0.101779	0.392368	0.642623	-0.507028	-0.526847	0.204593	-0.0328253	-0.127306	-0.156104
YIL095W	Prk1	S(642)	SHsPVKK	1	-0.134176	0.498277	0.342566	0.125528	0.291559	0.0905474	-0.458543	0.402651	-0.0850802	-1.28493	0.0436731	0.167922
YIL095W	Prk1	T(522)	KVItGESR	1	-0.145299	-0.317216	0.336981	0.933316	0.244067	0.28609	-0.306516	-0.592373	-0.0676394	-0.156337	-0.0615937	-0.15348
YIL095W	Prk1	T(537);S(540)	QNtGDsIR	2	-0.695616	-0.578582	-0.000916124	0.4431	-0.149408	-0.0168383	0.00841974	-0.09709	0.459541	0.0385417	0.377979	0.210868
YIL095W	Prk1	T(522);S(525)	VItGEsR	2	-0.519907	-0.601177	-0.0511987	0.160393	0.00134308	0.0547849	0.27954	0.0206962	0.260172	0.2288	0.0300495	0.136503
YIL105C	Slm1	S(156)	ARSsLQR	1	0.561903	0.311023	-0.0977745	-0.230112	-0.758743	-0.269564	0.842636	0.727139	-0.0101508	0.17136	-0.537871	-0.709846
YIL105C	Slm1	S(143)	NsLTNTSILSR	1	0.33257	0.659962	-0.102165	0.0752382	0.0899344	-0.222669	0.578554	0.58901	-0.51077	-0.794449	-0.388125	-0.307093
YIL106W	Mob1	T(64)	ADFtNNPVNGYNESDHGRMSPVLTTPK	1	0.56715	0.881778	-0.175588	-0.375067	-0.0553857	-0.412811	0.168846	-0.00392579	-0.308321	-0.347034	-0.196702	0.25706
YIL106W	Mob1	T(84);T(85)	ADFTNNPVNGYNESDHGRMSPVLttPKR	2	0.0387549	-0.353267	-1.27895	-0.187712	-0.097196	-0.377744	0.706663	0.305848	-0.172082	-0.170612	0.802814	0.783487
YIL107C	Pfk26	S(656)	SsFASDFLSR	1	-0.416327	-0.337652	-0.621919	-0.871804	-0.450623	-0.819801	-0.075806	0.0489194	0.835845	1.00658	0.728831	0.973762
YIL112W	Hos4	S(690)	EKTQsPILASR	1	0.0616244	0.076272	0.460077	0.614255	0.128079	0.38118	-0.622074	-0.76766	-0.0513371	-0.0286776	0.0236301	-0.275369
YIL115C	Nup159	T(751);S(753)	LPEtPsDEDGEVVEEEAQK	2	-0.435872	-0.653826	0.138816	-0.805477	-1.30898	-0.514512	0.329426	0.712891	1.31862	1.28785	-0.0420086	-0.0269217
YIL115C	Nup159	S(989);S(990)	QFEDHQssEEDASEKDSR	2	0.537199	0.324939	0.241386	0.297079	0.344309	0.467261	-0.247482	-0.407944	-0.448224	-0.183461	-0.427188	-0.497874
YIL115C	Nup159	Y(886)	DHNDDPKDGyVSGSEISVR	1	0.213738	0.0184768	-0.437486	-0.0160298	0.0122515	-0.314742	-0.0227741	-0.0258989	-0.122723	-0.00951168	0.356994	0.347706
YIL115C	Nup159	S(714)	GYTsEINDDNEEHESNGPNVNGNDLTDSTVEQTSSTR	1	-0.141148	-0.0547992	-0.445661	-0.502132	0.223956	-0.0406726	0.130375	0.204566	-0.0918107	-0.422982	0.324289	0.816021
YIL115C	Nup159	S(888)	DGYVsGSEISVR	1	0.0635896	-7.92492e-05	-0.148332	-0.0130676	-0.0346339	0.00421467	-0.260942	-0.233461	0.222118	0.10724	0.1582	0.135153
YIL122W	Pog1	S(164)	KINAsELASPR	1	0.419887	0.748446	-0.360097	0.0457977	0.169319	-0.470184	-0.343324	-0.144513	-0.220805	-0.597603	0.335021	0.418056
YIL122W	Pog1	S(168)	INASELAsPR	1	0.17631	0.409742	-0.239263	0.02937	0.28746	-0.0753664	-0.101556	-0.14907	-0.0725135	-0.314673	-0.0504374	0.0999972
YIL125W	Kgd1	S(910)	REsLGDK	1	0.410609	0.381183	0.514137	0.465625	0.44417	0.607688	-0.581052	-0.681506	-0.339852	-0.2328	-0.448012	-0.540191
YIL126W	Sth1	S(1045)	EDsEPLGR	1	-0.192221	-0.241486	0.0402949	0.205571	-0.366073	-0.0466269	0.567043	0.467505	0.389824	0.357734	-0.438868	-0.742697
YIL126W	Sth1	S(51)	sSAQLEQLLYR	1	0.188403	0.865217	-0.315823	-0.139487	0.305357	-1.21049	-0.390594	0.113622	-0.41091	-1.08182	0.623566	1.45296
YIL126W	Sth1	S(38)	LGsEEQPEITIPKPR	1	0.875383	1.01294	0.146692	0.0120485	-0.379519	-0.486717	-0.409732	-0.361695	0.133569	0.255317	-0.366394	-0.431893
YIL129C	Tao3	S(2316)	SDsIETTR	1	0.00985366	0.0733805	0.193152	0.37644	0.376125	0.422563	-0.282432	-0.418319	-0.00178529	0.0380651	-0.294913	-0.49213
YIL135C	Vhs2	S(84)	NFHNLsQR	1	-0.382351	-0.420037	-0.0768537	0.848276	-0.0829432	0.145887	-0.0693716	-0.237614	0.171231	-0.25861	0.440288	-0.0779019
YIL135C	Vhs2	S(325)	RNsNRPGSAANIMIGKPK	1	-0.442776	-0.228881	-0.194716	-0.311834	0.2282	-0.503859	-0.00333352	0.527059	0.0961907	-0.721567	0.316434	1.23908
YIL135C	Vhs2	S(159);T(160)	RPstIGLDR	2	-0.330393	-0.347501	0.159718	0.547166	-0.127749	0.0520776	-0.151474	-0.623577	-0.0540404	0.015819	0.503938	0.356015
YIL135C	Vhs2	T(288)	RYSNTTINNANGGtSAGSTTGAALSR	1	-0.0580056	-0.42398	0.0581463	0.604941	0.292514	0.0117919	-0.158307	-0.0684834	-0.193183	-0.490052	0.0588351	0.365782
YIL135C	Vhs2	S(59)	TVSNNAANsLSR	1	-0.165869	0.357831	-0.0781883	0.352725	0.179165	-0.504364	-0.00563195	0.179631	-0.210436	-0.949316	0.28096	0.563494
YIL135C	Vhs2	S(61)	TVSNNAANSLsR	1	0.0764835	-0.233723	-0.186454	0.145654	-0.149439	-0.128574	0.570924	0.415565	-0.373454	-0.476893	0.0619401	0.27797
YIL135C	Vhs2	S(159)	RPsTIGLDR	1	-0.349172	-0.930959	0.253128	0.302301	-0.113897	-0.384258	0.10662	0.0914853	0.10789	0.503581	-0.00456792	0.41785
YIL135C	Vhs2	S(53);S(61)	TVsNNAANSLsR	2	-0.282787	-0.628853	-0.26918	0.415649	-0.126477	-0.0455455	0.548125	-0.166472	-0.157965	0.232954	0.288284	0.192268
YIL147C	Sln1	S(832);S(833)	ALssDDEEGGNLGRPIENPK	2	0.346872	0.198329	0.0788605	0.248011	0.361561	0.394636	-0.852001	-0.816565	0.119358	0.202135	-0.0546505	-0.226546
YIL149C	Mlp2	S(1501)	GsGEDAEEELWNSPSK	1	-0.314494	-0.408985	0.381448	0.300106	0.628653	0.806196	-0.578156	-0.238331	-0.0899884	0.050381	-0.0274632	-0.509368
YIL150C	Mcm10	S(454)	RRESsGLEDK	1	-0.548184	-0.571496	0.066183	0.31351	0.345847	0.416727	-0.127978	-0.359614	0.256341	0.179726	0.00779148	0.0211469
YIL150C	Mcm10	S(18)	EILAVDPYNNITsDEEDEQAIAR	1	0.503515	0.632468	0.596654	0.617909	0.618747	-0.046088	-0.629411	-0.452512	-0.349737	-0.742147	-0.739769	-0.00963002
YIL153W	Rrd1	S(341)	EEESIEQANAGsPGR	1	-0.397549	0.215262	0.909447	1.0015	0.713102	0.39164	-0.39655	-0.306243	-0.255074	-0.834884	-0.573377	-0.467275
YIL154C	Imp2'	S(58)	DSNVSsLSR	1	-0.212158	-0.276507	0.204088	0.223349	0.0287634	0.188869	-0.279888	-0.383959	0.294223	0.233402	-0.0350285	0.0148463
YIL161W	Yil161W	T(25)	KASGLGNEGtPIGNEESTNK	1	-0.803152	-0.973248	-0.115906	-0.198552	-0.204398	-0.18518	0.167041	0.363088	0.650728	0.740401	0.305688	0.253492
YIR002C	Mph1	Y(20)	ASADDYFSDFEDDELDKLyEK	1	-0.330334	-0.372331	0.0800677	-0.179819	0.262942	0.437376	0.192993	0.270403	0.11176	0.329538	-0.317429	-0.485166
YIR003W	Aim21	S(623)	AISEEsLSPSEAIANR	1	0.356119	0.200656	-0.354431	0.0215125	0.448177	0.373919	-0.856178	-0.804787	0.384014	0.378286	0.0222994	-0.169586
YIR003W	Aim21	S(620)	AIsEESLSPSEAIANR	1	0.150774	0.275159	-0.640663	-0.401854	-0.504601	-0.439472	0.397761	0.568444	0.759533	0.372116	-0.162804	-0.374393
YIR003W	Aim21	S(29)	KTSELFPLSGSEsGDIK	1	-0.414126	-0.532386	-0.902079	-0.522433	0.0142326	-0.507999	-0.111194	-0.0604132	0.719206	0.608351	0.693961	1.01488
YIR003W	Aim21	T(552)	VLIDTtPGEQAER	1	-0.305656	-0.419367	-0.200497	-0.385551	-0.480768	-0.365483	0.710375	0.588991	0.311455	0.712981	-0.0349088	-0.131571
YIR003W	Aim21	S(675);S(678)	ELSGGYEDVDSALHSEEAsFHsL	2	0.48166	0.218258	-0.258285	0.149109	0.171723	0.00397202	-0.363444	-0.467157	-0.304334	-0.277246	0.272679	0.373064
YIR003W	Aim21	S(360)	RVsEECDSTLISTEEESK	1	-0.0269783	0.399135	0.410839	0.265998	0.104075	0.166376	-0.550596	-0.70578	-0.00706736	-0.217733	0.0697273	0.0920047
YIR003W	Aim21	S(678)	ELSGGYEDVDSALHSEEASFHsL	1	0.81244	1.33433	0.476819	0.716023	0.39254	-0.514873	-0.569723	-0.476018	-0.82858	-1.08261	-0.283496	0.0231405
YIR003W	Aim21	S(576)	EQsPNKMEAALCPFELDEK	1	0.114029	0.994985	0.121451	-0.340227	-0.186987	-1.01783	-0.264024	0.656653	0.312946	-0.925345	-0.0974144	0.631768
YIR003W	Aim21	S(36)	ANsEPPTPAGTPNVPTR	1	0.330888	0.471109	-0.126556	-0.189099	-0.574353	-0.329636	0.485102	0.431977	0.111438	-0.146306	-0.22652	-0.238044
YIR006C	Pan1	S(1039)	SIsSENSR	1	-0.394796	-0.267725	0.0581923	0.171976	0.241131	0.339422	0.0842483	0.00110441	-0.0526415	0.0282252	0.0638663	-0.273003
YIR006C	Pan1	T(560)	tGFGNNEIYTK	1	-0.582614	-0.605104	-0.798641	-0.691097	-0.82663	-0.201989	1.98753	1.53596	0.531	0.299554	-0.310648	-0.337327
YIR006C	Pan1	S(1265)	GLDEDEDDGWsDEDESNNR	1	0.018593	-0.0638245	0.235255	0.10588	0.226035	0.297073	-0.25748	-0.214575	0.00469408	0.174307	-0.227097	-0.298861
YIR006C	Pan1	T(1169)	KQIEDAQNESDEEEtNGK	1	-0.324765	-0.335928	0.70226	0.179455	0.33747	0.696067	-0.49534	-0.422442	0.264669	0.217408	-0.484294	-0.33456
YIR006C	Pan1	S(1119)	QEsDDEDEDDEEK	1	-0.0841016	-0.0711269	0.351164	0.232204	0.257839	0.413626	-0.357868	-0.448868	0.0384787	0.145662	-0.205513	-0.271496
YIR006C	Pan1	S(1164)	QIEDAQNEsDEEETNGKDNFGGHVNVPQAAPVAPSAAFSQNSTNAPR	1	0.330477	1.15954	-0.15225	-0.64025	0.381678	-1.35101	-0.158267	0.854761	-0.556654	-0.466144	0.155016	0.443106
YIR007W	Egh1	T(594);T(596)	ARtPtPEPSPASTVASVSTSTSK	2	0.807851	0.402225	-0.474987	-0.0435017	-0.459717	-0.185054	0.21579	-0.155644	-0.686371	-0.881633	0.597433	0.863607
YIR033W	Mga2	S(674)	IVGNDSPDSGTNGNSCsK	1	-0.67778	-0.282131	-0.489071	-0.162306	-0.487846	-0.636931	-1.03377	-0.95561	0.930108	0.412224	1.75836	1.62475
YIR033W	Mga2	S(467)	TIsLTNIEQQSQLNQR	1	-0.249562	-0.201176	-0.594129	-0.527235	-0.150565	-0.857518	-0.0826513	0.177837	-0.0219852	-0.0408022	1.09889	1.44889
YJL005W	Cyr1	S(60)	RNsAYSYYSPR	1	-0.625597	-0.657242	-0.180099	0.516562	0.0782187	-0.0700711	-0.00775995	0.0809309	0.485731	-0.290731	0.249506	0.420551
YJL020C	Bbc1	S(78)	EAESsPNTGSTEQR	1	0.0152818	0.132388	0.361688	0.227422	0.0504988	0.165375	-0.544608	-0.482665	0.4457	0.360128	-0.32856	-0.402648
YJL020C	Bbc1	S(403)	EGDNDEEKEEEDsEENRR	1	-0.284568	-0.443851	-0.0028237	0.197582	-0.0175319	0.0432964	-0.105526	-0.241128	0.539332	0.516048	-0.128882	-0.0719469
YJL020C	Bbc1	S(69)	SFVAVQGsEVGKEAESSPNTGSTEQR	1	1.15662	1.46728	-0.658198	-0.621245	-0.380202	-0.409512	0.209542	-0.0406064	-0.728112	-1.00702	0.400351	0.611102
YJL020C	Bbc1	S(627)	NGSINsLTK	1	0.303547	1.06778	0.0878707	-0.17383	0.357703	-0.584446	-0.203696	-0.0267294	-0.354797	-0.765903	-0.190627	0.483124
YJL020C	Bbc1	S(558)	KHsMVEQAFQIGNNESENVNSGEK	1	-0.532537	-0.525858	-0.618984	-0.711286	-0.253413	-0.782896	0.13844	0.963285	0.371259	0.182591	0.895237	0.874166
YJL020C	Bbc1	S(103)	DLPEPIsPETK	1	0.654825	0.26127	0.00498563	0.0534164	-0.11104	-0.0266717	-0.733385	-0.730008	0.139612	0.240581	0.0450031	0.201412
YJL020C	Bbc1	S(151)	KVPMDsPK	1	0.189724	-0.108271	0.041596	0.46577	0.118611	0.33058	-0.628842	-0.598444	0.151326	0.0233736	0.127585	-0.113009
YJL026W	Rnr2	S(15)	AAADALsDLEIK	1	-0.292301	-1.33962	-0.645618	-0.790739	-0.440651	-0.324565	-0.828376	-0.716257	0.656179	1.17674	1.55077	1.99445
YJL026W	Rnr2	S(22)	AAADALSDLEIKDsK	1	0.501615	-0.983678	-0.0286399	-1.34927	0.0869826	-1.00889	-0.955971	0.761451	-0.916575	0.454488	1.31259	2.1259
YJL033W	Hca4	S(692)	EMEAAMEEEIsGDEEEGK	1	-0.726113	-0.484978	0.298437	0.264523	0.51	0.601724	-0.0212285	0.173482	0.251469	-0.0583992	-0.312564	-0.496351
YJL042W	Mhp1	S(174);S(176)	ERsPsPTHVDR	2	0.312373	-0.235515	-0.0821083	2.23943	-0.521412	-0.578173	-0.2881	-0.77178	0.344387	-0.322599	0.23486	-0.331362
YJL042W	Mhp1	S(1050)	RVNsDDKDIK	1	-0.323723	0.0723353	-0.209981	-0.224111	-0.505276	-0.260034	-0.268786	-0.320257	0.808585	0.532528	0.49918	0.199538
YJL042W	Mhp1	S(176)	SPsPTHVDR	1	-0.102904	-0.149874	0.519372	1.06744	0.373823	0.613717	-0.274976	-0.744841	-0.230236	-0.333565	-0.285079	-0.45288
YJL042W	Mhp1	S(1201)	SsPDAEDAVEFR	1	-0.265184	-0.227385	-0.0616256	0.0429788	-0.458955	-0.237652	-0.220135	-0.206677	0.588085	0.552387	0.417814	0.0763476
YJL050W	Mtr4	T(38)	NADTNVGDTPDHtQDKK	1	0.170065	0.140637	0.201018	0.762525	-0.216318	0.123104	0.215601	-0.278348	-0.0703043	-0.284138	-0.300062	-0.46378
YJL057C	Iks1	S(96)	RAsAGVESESSR	1	-0.290181	-0.551661	0.360265	0.350952	0.148798	0.286387	-0.268233	-0.503988	0.194685	0.442312	-0.145333	-0.0240017
YJL076W	Net1	S(231)	IVSNNsDDEDEDIGER	1	-0.0092121	-0.234719	0.332466	-0.0467142	0.264794	0.422988	-0.161196	-0.135551	-0.00848458	0.253136	-0.418368	-0.25914
YJL076W	Net1	S(1082)	VRPsLSSLSDLVSR	1	-0.331089	0.61166	-0.362907	-0.921013	-0.22385	-0.873248	0.411869	0.807106	0.145693	-0.21474	0.360285	0.590235
YJL076W	Net1	S(317)	VVsEHAHK	1	-0.330021	-0.552964	0.212296	1.04788	0.435125	0.754269	-0.700737	-0.79251	0.121388	-0.427421	0.261948	-0.0292501
YJL080C	Scp160	T(50);S(54)	KPtPLPsLK	2	-0.844693	-0.875058	-0.970212	-1.00039	-0.711185	-0.560407	0.885666	0.942761	1.05234	1.26427	0.588085	0.228827
YJL080C	Scp160	S(54)	KPTPLPsLK	1	-0.0318467	-0.0314233	-0.804005	-1.12054	-0.612072	-0.416829	0.867616	1.08674	0.455759	0.697556	0.124549	-0.215498
YJL082W	Iml2	S(189)	NSSSPSPsEK	1	-0.312776	0.0581391	0.801214	0.510604	0.140687	0.72745	-0.692949	-0.828363	-0.310228	-0.840175	0.374052	0.372345
YJL082W	Iml2	S(268)	LRDDLGLQTTPSQAsDR	1	-0.11298	0.0265473	-0.0129664	0.205995	0.751318	0.240773	-0.134113	-0.194287	-0.450252	-0.392855	-0.041007	0.113827
YJL084C	Aly2	S(1022);S(1023)	LssPEK	2	-0.0147523	0.260462	0.837846	0.61174	0.0841522	0.490979	-0.654661	-1.00283	0.323977	0.0725397	-0.576562	-0.43289
YJL084C	Aly2	S(155)	TLsDNETITSR	1	1.41614	1.1943	0.0434894	0.128751	-0.109713	0.0954825	-0.545164	-0.718043	-0.214113	0.150272	-0.590644	-0.850758
YJL084C	Aly2	S(838)	REsVQDNLPSTIR	1	-0.0089729	-0.104599	0.119094	0.467941	-0.0270181	0.172045	-0.485357	-0.659702	0.368402	0.29884	0.033852	-0.174524
YJL084C	Aly2	S(201)	SSsVTSSNGPSR	1	0.208974	0.279655	0.2567	0.224378	0.274919	0.323016	-1.53274	-1.72094	0.575707	0.34077	0.216441	0.553119
YJL084C	Aly2	S(155);S(162)	TLsDNETITsR	2	0.114238	-0.108285	0.144409	0.381268	-0.0723613	0.0491587	0.239523	-0.146362	-0.188706	0.379918	-0.237103	-0.555698
YJL095W	Bck1	S(816)	EAPKPPANTsPQR	1	-0.120375	-0.204583	0.37596	0.360919	0.230443	0.487107	-0.340728	-0.282244	-0.340685	-0.315639	0.195385	-0.0455613
YJL095W	Bck1	S(250)	NSKsQEDISNSR	1	-0.119139	-0.0678615	0.300249	0.32628	0.0771366	0.283396	-0.251893	-0.763318	-0.136419	-0.0860425	0.130066	0.307546
YJL095W	Bck1	T(815)	REAPKPPANtSPQR	1	-0.107068	-0.285174	0.401785	0.601606	0.440041	0.502914	-0.359498	-0.41756	-0.41437	-0.258831	0.0391102	-0.142955
YJL122W	Alb1	S(80)	KNESQNSTAVILQNAPSsPASITTR	1	0.525544	0.444927	-0.588475	-0.236705	-0.312625	0.0132003	0.829395	0.765359	-0.355872	-0.816669	-0.0979676	-0.170111
YJL123C	Mtc1	S(341)	EADATPDDDRSSISSNsNK	1	-0.348712	0.0142875	0.701205	0.577304	0.283197	0.78228	-0.344966	0.0496817	0.342949	-0.305883	-0.633674	-1.11767
YJL123C	Mtc1	T(77)	SNLSLtDK	1	-0.681418	-0.729181	-0.689345	-0.810078	-0.49887	-0.401885	0.477091	0.464315	1.114	1.19723	0.278541	0.279596
YJL123C	Mtc1	S(450)	KQKESEDEDEDEDDEIIDPsEWVK	1	0.534844	0.322994	-0.350453	-0.0710352	-0.135345	-0.17538	-0.156543	-0.552847	-0.236806	-0.121206	0.344303	0.597474
YJL123C	Mtc1	S(281)	KPSVADGELGNsK	1	-1.10724	-1.21939	-0.377171	-0.597848	-0.442153	-0.0829483	-0.255011	-0.390649	0.696076	0.659625	1.4855	1.63121
YJL123C	Mtc1	S(88)	KAPsEPVNNK	1	-0.0604732	-0.218318	-0.266297	-0.0501737	-0.252142	0.0122876	0.166791	-0.119462	0.239345	0.290978	0.172777	0.0846889
YJL128C	Pbs2	S(74)	SASVGSNQsEQDK	1	-0.209032	-0.550198	0.501876	-0.0313537	0.336599	0.725602	0.0172378	-0.169084	0.0625125	0.508667	-0.709194	-0.483634
YJL128C	Pbs2	S(71);S(74)	SASVGsNQsEQDK	2	-0.610462	-0.498171	0.397734	0.247853	0.517615	0.970666	-0.2565	-0.40216	0.495899	0.310211	-0.544287	-0.6284
YJL128C	Pbs2	S(66);S(68);S(71)	sAsVGsNQSEQDKGSSQSPK	3	0.153856	-0.325238	-0.310659	0.0554863	0.261588	0.390385	0.104456	-0.237998	-0.245827	0.248849	0.036585	-0.131484
YJL130C	Ura2	T(1859)	RFSItEEAIADNLDAAEDAIPEQPLEQK	1	-0.523259	-0.514617	0.0345354	-0.144686	0.646142	0.402209	0.0888292	0.416109	0.065211	0.0343627	-0.311459	-0.193377
YJL130C	Ura2	S(200)	VsIDEPK	1	-0.623952	-0.298629	-0.153614	0.863661	-0.330757	0.407502	1.18349	-0.112055	0.417015	-0.2356	-0.49218	-0.62488
YJL130C	Ura2	S(1857)	RRFsITEEAIADNLDAAEDAIPEQPLEQK	1	-0.319909	-0.412885	-0.0942002	-0.374579	0.730275	0.150023	0.199515	0.724701	-0.430785	-0.488042	-0.0848957	0.400782
YJL134W	Lcb3	S(37)	TLSNPNDFQEPNYLLDPGNHPsDHFR	1	-0.269796	0.0419649	0.185525	0.321039	0.113718	0.0957879	-0.404899	-0.532697	0.305762	-0.0428308	0.0696901	0.116736
YJL138C / YKR059W	Tif2 / Tif1	T(146)	DAQIVVGtPGR	1	-0.229727	-0.220145	0.315094	0.169833	-0.242097	0.139612	0.0396791	-0.136069	0.373664	0.674946	-0.256613	-0.628177
YJL138C / YKR059W	Tif2 / Tif1	S(129)	VHACIGGTsFVEDAEGLR	1	-0.360316	-0.0537658	0.267993	0.390315	-0.0617428	-0.680989	-0.282064	-0.171101	-0.0552511	-0.354592	0.491381	0.870133
YJL141C	Yak1	S(295)	RAsLNSK	1	-0.105778	-0.534214	-0.139241	-0.366726	-0.470719	-0.370259	-0.0650548	0.160923	0.716603	0.967439	0.0641898	0.142836
YJL146W	Ids2	S(130);S(136)	AsPIRQPsVDVPPLTTR	2	-0.132407	-0.0523149	-0.0519996	-0.562763	0.12071	0.0984985	-0.180542	0.0274182	0.28879	0.317633	-0.0445516	0.171528
YJL146W	Ids2	S(130)	AsPIRQPSVDVPPLTTR	1	0.163979	0.209288	0.361157	0.431499	0.394255	0.332965	-0.485455	-0.266878	0.0265626	-0.247898	-0.460499	-0.458977
YJL146W	Ids2	S(126)	ESVSDILNDLTLGSPEPsER	1	0.583235	0.523887	-0.216947	-0.146315	-0.0319365	-0.331988	-0.546503	-0.00194351	-0.00284202	-0.375294	0.214993	0.331653
YJL146W	Ids2	S(148)	RSsIQDVQWIR	1	-0.400486	-0.0765766	-0.19493	-0.0427673	0.0762333	-0.448536	-0.054874	0.138656	0.323702	-0.247558	0.250354	0.676782
YJL146W	Ids2	S(136)	QPsVDVPPLTTR	1	-0.607592	-0.411052	-0.195654	0.0436947	0.100783	0.112439	-0.374385	-0.494968	0.509207	0.362156	0.567642	0.38773
YJL155C	Fbp26	S(446)	LHQLLNDsPLEDKF	1	0.465349	0.783919	-0.380451	-0.0820199	-0.0363916	-0.362514	-0.354753	-0.17807	-0.0747733	-0.321025	0.38102	0.159709
YJL164C	Tpk1	S(41)	ETTATESGNEsK	1	-0.0898486	-0.0160216	0.345753	0.388638	-0.510642	-0.0486499	-0.564417	-0.524593	0.62474	0.184474	0.194414	0.0161525
YJL165C	Hal5	S(216)	RNsLGVR	1	-1.37213	-0.707692	-0.246223	0.202111	0.0187323	0.230793	-0.00595333	-0.495781	0.828368	0.46752	0.777203	0.30305
YJL165C	Hal5	S(470);S(472)	sNsNKQEDSDDTEGK	2	0.656088	0.502761	-0.406868	-0.15429	-1.27871	-0.434241	0.599091	0.575153	1.16419	0.820569	-0.733789	-1.30995
YJL165C	Hal5	S(7)	GDEKLsR	1	-0.919455	-1.17468	-0.209573	1.17594	-0.141789	1.36829	0.0685573	-0.917792	0.412203	-0.0954112	0.790056	-0.356341
YJL165C	Hal5	S(232)	KNsLSTPR	1	-0.553249	-0.643351	0.0675842	0.5081	0.0113221	0.368439	-0.294785	-0.420985	0.515033	0.126219	0.254094	0.0615775
YJL176C	Swi3	T(191)	IQKEEEPENNTVIEGVKEESQPDENtK	1	-0.634019	-0.596982	0.401296	0.242901	0.27825	0.26997	0.255468	0.603673	-0.0353389	0.495409	-0.265656	-1.01497
YJL177W	Rpl17B	S(66)	FNSsIGR	1	-1.02092	-1.09891	-0.450785	-0.12827	-0.639145	-0.381464	1.3347	1.13418	1.15328	1.15918	-0.377118	-0.684713
YJL177W	Rpl17B	S(65)	RFNsSIGR	1	-0.602372	-0.718697	-0.268793	0.613829	-0.745842	0.202597	1.17688	0.23287	0.727965	0.284181	-0.287834	-0.614781
YJL191W	Rps14B	S(12)	DNsQVFGVAR	1	0.00545338	-0.134333	-0.347892	-0.0201726	-0.509788	-0.133559	1.65171	0.788885	-0.336218	-0.394095	-0.463262	-0.106725
YJL191W	Rps14B	S(126)	IEDVTPVPSDsTR	1	-0.159399	-0.101875	0.10122	0.28176	-0.183059	0.0596404	0.101238	0.156028	0.234721	-0.00470345	-0.0947221	-0.390849
YJL197W	Ubp12	Y(1148)	LyEFNKTDEEEDVSDDMIECNEDVQAPEYSNR	1	0.0507016	0.0103199	0.322616	0.219808	0.322615	0.235859	-0.217347	0.0806228	-0.553668	-0.57134	0.0750832	0.0247306
YJR001W	Avt1	S(31)	GSAFsPDDSVSQFQSDGFMTR	1	-0.0954737	-0.181199	-0.891384	-1.54875	-0.651905	-0.234549	1.47544	2.03165	-0.307145	-0.721293	0.470464	0.654144
YJR001W	Avt1	S(115)	RLsVTLNNAGRPR	1	-0.382813	-0.78071	-0.183562	-0.0982994	-0.143134	0.0843365	0.251522	0.141484	0.0183099	0.143284	0.439677	0.509904
YJR001W	Avt1	S(8)	PEQEPLsPNGR	1	0.0901916	-0.291645	0.411797	0.424376	0.452082	0.449914	-0.38125	-0.661358	-0.410803	0.087923	-0.162019	-0.00920953
YJR009C	Tdh2	S(207)	TASGNIIPsSTGAAK	1	-0.505146	-0.214205	0.188949	-0.304386	-0.00626117	0.332326	-0.56901	-0.994149	0.471115	0.407631	0.420353	0.772783
YJR049C	Utr1	S(58);S(59)	KIssESSSR	2	0.300379	0.00617186	-0.423804	0.0615541	-0.154243	0.189671	-0.294978	-0.794815	0.52157	0.463719	0.0510763	0.073699
YJR049C	Utr1	S(59)	ISsESSSR	1	-0.431437	-0.51892	0.215644	0.485367	0.228436	0.4009	0.0883356	-0.333354	-0.0844562	-0.0267891	-0.0165227	-0.00720382
YJR049C	Utr1	S(58)	KIsSESSSR	1	0.183346	-0.220802	-0.0459678	-0.086795	-0.0337577	0.156172	-1.27505	-0.841711	0.679969	0.430824	0.491458	0.562312
YJR052W	Rad7	S(85)	VVEDEEIDEIGTGsGTETER	1	0.514244	0.352365	0.0900114	-0.0157206	0.0659132	0.251371	0.0577261	0.374491	-0.360791	-0.324503	-0.367104	-0.638004
YJR052W	Rad7	Y(112);S(118)	LVPADSDEEEyETSHIsDTPVSLSSANDR	2	0.18151	0.600807	-0.392518	-0.0609696	0.27871	-0.377915	0.138655	0.529758	-0.123163	-0.493517	-0.083194	-0.198164
YJR059W	Ptk2	S(65)	KRPTSPSISGSGsGGNSPSSSAGAR	1	-0.0491699	-0.0629328	0.272879	0.59858	0.0352755	0.128952	-0.0383397	-0.387871	0.103531	0.291487	-0.324176	-0.568215
YJR059W	Ptk2	T(56)	KRPtSPSISGSGSGGNSPSSSAGAR	1	-0.317586	0.801467	0.0574538	0.262289	-0.176066	-0.848608	-0.128117	0.491003	0.724984	0.297315	-0.160668	-1.00347
YJR059W	Ptk2	T(56);S(57)	KRPtsPSISGSGSGGNSPSSSAGAR	2	0.88609	0.650341	-0.443301	-0.0258511	-0.972413	-0.528965	0.871473	0.788395	0.451007	0.315807	-0.792857	-1.19973
YJR059W	Ptk2	S(104)	sSAALQDLIK	1	-0.339444	-0.247982	-0.523348	-0.883919	-0.694841	-0.664621	1.09577	1.00447	0.807219	0.939924	-0.345351	-0.14787
YJR059W	Ptk2	S(711)	VEDNLsEDDSSMK	1	0.558453	0.834098	0.790755	0.381139	0.221945	0.312911	-1.58938	-1.21408	0.551001	0.0631217	-0.53278	-0.377187
YJR059W	Ptk2	S(715);S(716)	VEDNLSEDDssMKELK	2	-0.366232	-0.348067	-0.654944	-0.612424	-0.68778	-0.425563	0.399364	0.302726	1.03767	0.932978	0.271919	0.150349
YJR059W	Ptk2	S(57)	KRPTsPSISGSGSGGNSPSSSAGAR	1	0.564753	0.489588	0.367818	0.0527899	-1.64033	-0.471647	0.803249	0.403413	0.404003	0.246322	-0.499492	-0.720467
YJR059W	Ptk2	S(778)	NFSAPNVSSSSNsLR	1	0.0398421	0.672307	0.0195463	0.135426	0.0251058	-0.226176	-0.107304	-0.292031	0.337553	-0.219855	-0.314744	-0.0696716
YJR072C	Npa3	S(352)	GEVNENsAPDLQR	1	-0.463844	-0.45335	-0.0832317	-0.16234	-0.00586128	0.223385	1.25746	0.999147	0.00664228	0.297339	-0.711163	-0.904182
YJR072C	Npa3	S(313)	SNAAASDNDSIDAIsDLEEDANDGLVDRDEDEGVER	1	0.0688108	-0.229579	0.289157	1.46689	0.181708	-0.109928	-0.0546133	-0.716275	-0.0368017	0.131294	-0.448261	-0.542403
YJR072C	Npa3	S(299);S(313)	sNAAASDNDSIDAIsDLEEDANDGLVDRDEDEGVER	2	0.364876	0.19422	0.761476	-0.0853297	0.263863	0.485074	-0.388018	-0.573641	-0.422382	0.0133043	-0.579815	-0.033628
YJR072C	Npa3	S(299)	sNAAASDNDSIDAISDLEEDANDGLVDRDEDEGVER	1	-0.531066	0.265776	0.472769	0.338948	-0.106373	0.759714	0.313721	-0.861474	-0.116215	-0.113878	-0.0328361	-0.389086
YJR076C	Cdc11	T(327)	RNtNPFK	1	-0.233397	-0.618533	0.208331	0.158091	0.372838	0.897023	-0.620783	-1.26357	-0.0951766	0.190492	0.368187	0.636497
YJR083C	Acf4	S(62)	RLAIPISsPQR	1	0.267628	0.0591144	-0.155209	1.46246	0.0376509	-0.354051	0.268385	-0.164577	-0.262488	-0.505158	-0.155967	-0.497789
YJR083C	Acf4	S(165)	sINDFFSKPNNNVNSNINNTLPNR	1	-0.583379	-0.652355	-0.621975	0.58758	0.0201775	-1.00985	0.0343893	0.234561	0.512413	-0.0209734	0.638374	0.861034
YJR089W	Bir1	S(477)	GIDsDNDNVIR	1	-0.355607	-0.201881	0.407606	0.609783	0.126624	0.502176	-0.202497	-0.4788	0.371645	0.0881076	-0.34777	-0.519385
YJR091C	Jsn1	S(157);S(160)	GsSDsFNLPHQISR	2	-0.315921	-0.0992989	-0.171421	-0.0765872	-0.21535	-0.252882	-0.191218	-0.199158	0.482848	0.499361	0.411064	0.128565
YJR091C	Jsn1	S(157)	GsSDSFNLPHQISR	1	0.104157	0.0128353	0.0384757	0.166537	0.101046	-0.1486	-0.0119375	0.206491	-0.0406186	-0.146917	-0.191123	-0.0903467
YJR092W	Bud4	S(167)	STQPLLSYPEsPIHR	1	-0.153331	-0.0995508	0.387845	0.631787	0.197278	0.126361	-0.298119	-0.427108	-0.17421	-0.227747	0.0405367	-0.00374195
YJR092W	Bud4	S(811)	EIEsAGDITFNR	1	-0.538775	-0.688915	-0.0320141	-0.0927855	-0.0848081	0.0472508	0.141729	0.262691	0.00936327	0.16587	0.504505	0.305889
YJR092W	Bud4	S(91);S(96)	VNsELEEsPAAVHQER	2	-0.124173	-0.216031	0.297684	0.570263	0.0380286	0.173037	0.143745	0.00638098	-0.231768	-0.376541	-0.123517	-0.157109
YJR093C	Fip1	S(50)	QKFDsPVEETPATAR	1	0.409764	0.354013	-0.156362	-0.0752807	-0.109928	-0.138717	-0.133844	-0.203466	0.151454	0.259612	-0.161084	-0.196162
YJR104C	Sod1	S(99)	GsFKDSLIK	1	0.674205	0.563769	0.395565	-0.0684876	0.0763412	0.0688087	-0.182616	-0.271211	0.0425848	0.353903	-1.00608	-0.646781
YJR104C	Sod1	S(39)	FEQASESEPTTVSYEIAGNsPNAER	1	0.210904	1.56901	0.841743	-0.554877	-0.0621925	-0.682413	-0.341183	-0.0517102	0.112203	-0.698386	-0.761474	0.418377
YJR134C	Sgm1	S(470)	ENELKPHQENsNEK	1	-0.144018	-0.23709	-0.595796	-0.0924222	-0.401069	-0.617088	0.544745	0.616163	0.429641	0.435839	0.166497	-0.105401
YKL010C	Ufd4	S(91)	TQNGsDEDVNEEEDGLER	1	-0.119048	0.0230648	0.0723607	-0.10438	-0.00748853	0.296695	-0.433574	-0.864467	0.236172	0.269555	0.251578	0.379533
YKL027W	Tcd2	T(54)	SDtDKYHQYDEQFIR	1	-0.623913	-0.464978	0.202632	0.367594	0.264863	0.328178	-0.186384	-0.00264239	0.159588	-0.278019	0.183215	0.0498682
YKL038W	Rgt1	S(202)	KGsIDSLQSDISVR	1	0.243111	0.833625	0.0693459	-0.0496085	0.12611	-0.713966	-0.295898	0.0912639	-0.00247154	-0.523869	-0.140198	0.362554
YKL038W	Rgt1	S(410)	RQsAPVSVTLSMDR	1	-0.0174121	0.148143	0.0600197	0.189538	-0.0545866	-0.232498	-0.146083	-0.157509	-0.032438	-0.343517	0.1905	0.395842
YKL042W	Spc42	S(284)	KLsLNNQLQELQSMMDGDDNIKLDNVSK	1	0.554702	0.687155	-0.728813	-0.529114	-0.0287077	-1.12598	-0.154568	0.268298	-0.422643	-0.675079	0.780029	1.37472
YKL042W	Spc42	S(294)	KLSLNNQLQELQsMMDGDDNIK	1	-0.110344	0.322005	-0.156879	0.122095	0.234867	-0.796488	-0.452033	-0.0276807	0.133852	-0.659434	0.350537	1.0395
YKL042W	Spc42	S(213)	SEDGNNDRMsPLPSPLNTISPINNR	1	0.411751	1.07178	0.100687	-0.0170944	-0.141032	-0.597141	-0.0650563	0.159738	-0.175628	-0.772976	-0.130722	0.155695
YKL042W	Spc42	S(213);S(217);S(223)	SEDGNNDRMsPLPsPLNTIsPINNR	3	0.264847	-0.16369	-0.295813	0.926084	-0.582092	-0.605111	0.379995	-0.000193431	0.00268453	-0.0545693	0.230378	-0.10252
YKL042W	Spc42	T(357)	VKPENNMSETFAtPTPNNR	1	-0.379744	-0.586784	-0.122226	-0.146133	-0.237734	-0.0893854	0.241158	0.222496	0.0474137	0.207517	0.451132	0.392289
YKL042W	Spc42	S(213);T(221)	SEDGNNDRMsPLPSPLNtISPINNR	2	0.109669	0.245994	0.115749	0.0353939	-0.0251652	-0.10318	0.00707472	-0.0936215	-0.163016	-0.0342516	-0.0443108	-0.0503347
YKL052C	Ask1	S(155);S(156)	LPDssDEDTGSEAVPSR	2	0.270676	0.269517	0.171587	0.454158	0.186676	0.089362	-0.343232	-0.516074	-0.19121	-0.25204	-0.0944971	-0.0449235
YKL052C	Ask1	S(156)	LPDSsDEDTGSEAVPSR	1	-0.0508361	0.24376	0.651556	0.629071	0.363415	0.308549	-0.344778	-0.701997	-0.354056	-0.385901	-0.265301	-0.0934809
YKL052C	Ask1	S(155)	LPDsSDEDTGSEAVPSR	1	0.347039	0.261151	0.588499	0.708225	0.253894	0.478415	-0.498861	-0.833175	-0.507525	-0.303722	-0.183045	-0.310894
YKL052C	Ask1	S(250)	QLAHEEHINNDGDNDDENSNNIESsPLK	1	-0.171584	-0.0226349	0.722471	0.419928	0.315299	0.590478	-0.6822	-0.203494	-0.153427	-0.514415	-0.0305587	-0.269863
YKL054C	Def1	S(273)	EIsDIK	1	-0.33709	-0.473789	0.248938	-0.163136	0.147568	0.435966	0.00541794	0.193729	0.18077	0.265536	-0.245604	-0.258306
YKL054C	Def1	S(113)	SSNNSNSFTsTK	1	-0.346689	-0.380297	-0.108774	-0.256891	-0.113866	-0.195185	0.933033	0.927236	0.0216847	0.251273	-0.385389	-0.346137
YKL054C	Def1	S(260)	KTEsPLENVAELK	1	0.0451315	0.262208	-0.273459	-0.874669	-0.526374	-0.538767	0.0355991	0.351711	0.49607	0.344079	0.223033	0.455438
YKL060C	Fba1	S(83)	GISNEGQNAsIK	1	-0.578029	-0.504939	-0.256326	-0.0301833	-0.221351	0.0154342	0.263138	0.0158514	0.710327	0.55447	0.0822406	-0.0506339
YKL062W	Msn4	T(526)	QATVSPNtR	1	-0.0930162	-0.184937	0.409637	0.591195	-0.0496507	0.308729	-0.119429	-0.127572	0.289581	-0.329426	-0.437122	-0.257989
YKL064W	Mnr2	S(461)	THPNsPTPGIK	1	0.0411354	0.0224311	0.426737	0.585088	0.0979177	0.399982	-0.325566	-0.669817	-0.0785268	-0.0190754	-0.161697	-0.318609
YKL068W	Nup100	S(801)	AHsPQTDLKDDHDESTPDPQSK	1	-0.0528396	-0.0287501	-0.209342	0.226439	-0.0845212	0.224868	-0.120578	-0.558373	0.024547	0.057844	0.442734	0.0779713
YKL079W	Smy1	S(566);S(570)	ELSLNKsAIPsPR	2	-0.327348	-0.182858	-0.288855	-0.419221	-0.717565	-0.692581	0.903844	0.325607	-0.800548	-0.310783	1.23047	1.27984
YKL079W	Smy1	S(570)	SAIPsPR	1	-0.0557954	0.0376359	0.176843	0.383681	0.0532392	0.160698	-0.522862	0.244215	-0.0070687	-0.287719	0.355644	-0.538511
YKL088W	Cab3	S(42)	RKsIHDESNFER	1	-0.516039	-0.608423	0.240729	0.466923	0.218785	0.640223	-0.360607	-0.502474	0.365723	0.163089	0.0514076	-0.159338
YKL089W	Mif2	S(325)	IVTYDEsEDEEEILAAQR	1	0.824676	1.4538	-0.0387159	-1.25223	-0.0395995	-1.08027	-0.0572429	0.685264	-0.572073	-0.492809	-0.117044	0.686249
YKL090W	Cue2	S(109)	DNQANsPDSVKR	1	-0.156953	0.10652	0.620164	0.76165	0.411789	0.716308	0.0282576	-0.300156	-0.285129	-0.331961	-0.61813	-0.952362
YKL092C	Bud2	S(854)	DLDsPIEVKPEIGELEFEK	1	0.13067	-0.123277	-0.296569	-0.279261	0.213103	0.161194	0.112382	0.18829	0.283787	0.407802	-0.443373	-0.354748
YKL101W	Hsl1	S(1284);S(1287)	RRPsEEsVNPK	2	-0.348486	-0.689249	-0.105194	0.373833	-0.18156	0.00756413	0.785775	0.325761	-0.0909214	0.111043	-0.0596141	-0.128952
YKL104C	Gfa1	S(332)	EVGAsMTR	1	-0.176903	-0.339007	-0.304273	0.266577	-0.545943	-0.189354	0.199494	-0.137958	0.707366	0.468427	0.120259	-0.0686857
YKL105C	Seg2	S(137)	TTsLGNSGSTIR	1	-0.322494	-0.0766468	0.10228	-0.264831	-0.154469	-0.233084	-0.0979343	-0.242123	0.150821	0.353288	0.321796	0.463397
YKL105C	Seg2	S(562)	EDQEEALSDNEPEsFEK	1	0.108092	0.606246	0.440801	0.0227487	0.398514	-0.243699	-0.664908	-0.631507	-0.572962	-0.528314	0.290464	0.774526
YKL105C	Seg2	S(317)	EVHsLEEK	1	-0.0781554	-0.00486231	0.314302	0.0707751	0.0230265	0.0850903	0.0949747	-0.215415	-0.580026	-0.146027	0.225878	0.210438
YKL112W	Abf1	Y(467)	SNSIDyAK	1	-0.212264	-0.376369	-0.486437	-1.07333	-0.0899946	0.125597	-0.112851	-0.144326	0.604426	1.02174	0.297119	0.446682
YKL112W	Abf1	S(717)	ADDEEDLsDENIQPELR	1	0.225889	0.272779	0.265818	0.0752867	0.0548904	0.271033	-0.157116	-0.133184	-0.16651	-0.0411986	-0.222971	-0.444716
YKL112W	Abf1	S(615)	NVVDENLINDMDsEDAHK	1	0.0366827	-0.097132	-0.36746	-0.240928	-0.105276	0.0639803	0.629252	0.170629	-0.237491	0.042338	0.0442922	0.0611122
YKL116C	Prr1	S(132)	VVSELIAPANLsPQR	1	0.376602	0.697538	0.29682	0.0688	0.250131	-0.240136	-0.475398	-0.311295	-0.493098	-0.629463	0.0449429	0.414557
YKL124W	Ssh4	S(358)	DGLLEDPDNVsFR	1	-0.108946	0.0636403	0.489975	-0.0901127	-0.132247	-0.108089	-0.444525	0.0581007	0.494443	0.633789	-0.298699	-0.557328
YKL126W	Ypk1	S(71)	GTINPSNSSVVPVRVsYDASSSTSTVR	1	0.283482	0.550193	0.032688	-0.0875524	0.238119	-0.305217	-0.880958	-0.616997	-0.00012945	-0.165073	0.326799	0.624647
YKL126W	Ypk1	S(76)	VSYDASsSTSTVR	1	-0.44794	-0.447918	0.00301698	0.424584	0.0176353	0.140685	-0.393095	-0.60876	0.479926	0.240451	0.340456	0.250959
YKL129C	Myo3	S(357)	GsVYHVPLNPVQATAVR	1	0.144717	0.129495	-0.221842	-0.201813	-0.271934	-0.427523	0.0444389	-0.156252	0.25566	0.527593	0.0489598	0.128499
YKL129C	Myo3	Y(359)	RGSVyHVPLNPVQATAVR	1	-0.0808867	0.223364	-0.150034	-0.309669	-0.132193	-0.179635	0.198302	0.276585	0.0951456	-0.172687	0.0696662	0.162042
YKL140W	Tgl1	T(508)	VFSTSAIDEDNENEHQDDtEDEIHKEQQR	1	-0.476722	-0.64899	-0.215399	-0.479247	-0.588169	-0.397827	0.304726	0.329024	0.757849	1.1452	0.217714	0.0518364
YKL140W	Tgl1	T(460);S(462)	tHsADRSPLSVQANEADEVHNADNSR	2	0.240032	0.247376	0.215604	0.710723	-0.105212	0.145117	-0.0518298	-0.27727	-0.130519	-0.674418	-0.168075	-0.151528
YKL149C	Dbr1	S(269);S(270)	KNNNEIDLDLssDEDER	2	-0.170826	0.0273404	0.186267	0.0615485	0.0370382	0.182394	-0.418378	-0.24732	0.328439	0.134251	0.0374592	-0.158214
YKL160W	Elf1	S(117);S(124)	TQNDGEIDsDEEEVDsDEER	2	0.149504	0.11411	0.0868356	-0.17261	-0.136587	0.297902	-0.110944	-0.510576	0.0313637	0.297596	-0.0201725	-0.0264228
YKL168C	Kkq8	T(117)	QTGSGASNSPtR	1	0.164522	0.485881	0.556174	0.227737	-0.133562	0.269625	-0.871308	-0.933201	0.414843	0.0380102	-0.130669	-0.0880529
YKL172W	Ebp2	S(165);S(180);S(186)	EEsEEKEEQEEEQDVPLsDVEFDsDADVVPHHK	3	-0.331402	-0.620451	-0.332625	-0.201651	-0.564574	-0.136001	-0.684688	-0.236203	1.39102	1.19092	0.522267	0.00338477
YKL172W	Ebp2	S(104);S(110)	HMsGDEDEsGDDREEEEEEEEEEEEEEGR	2	-0.311302	-0.22775	0.0953632	0.0372294	0.224488	0.389509	-0.0332194	-0.0851531	0.134543	0.266854	-0.109873	-0.38069
YKL172W	Ebp2	S(186)	EESEEKEEQEEEQDVPLSDVEFDsDADVVPHHK	1	0.0418453	0.132195	1.33903	1.48885	0.993468	1.06097	-1.55929	-0.96229	-0.446732	-0.943957	-0.368324	-0.775775
YKL172W	Ebp2	S(165);S(180)	EEsEEKEEQEEEQDVPLsDVEFDSDADVVPHHK	2	-0.720683	-0.446633	0.788233	0.385024	0.35705	0.521672	-0.835086	-0.738896	-0.0220086	0.0226683	0.432495	0.256166
YKL176C	Lst4	S(531)	HNEsWER	1	0.0516202	0.227517	0.497083	0.505886	0.424085	0.590834	-0.264005	-0.527383	-0.184191	-0.341406	-0.524593	-0.455449
YKL181W	Prs1	S(218)	KQsMLR	1	-0.297193	-0.174362	-0.477623	-0.114606	-0.499169	-0.380468	0.339299	-0.051785	0.524597	0.396046	0.410089	0.325175
YKL185W	Ash1	S(465);S(469)	FALDsPPQsPR	2	0.262303	0.253945	-0.0021797	0.272452	-0.0943922	0.0557411	-0.337984	-0.225948	-0.0423964	-0.253377	0.21465	-0.102814
YKL186C	Mtr2	T(125)	MGQDATVPIQPNNtGNR	1	-0.643369	-0.731278	-0.155945	-0.340644	-0.441115	-0.0821635	0.710218	0.402792	0.126047	0.386311	0.404165	0.364983
YKL187C	Fat3	S(678)	KGEIYTYGDGSAIsADR	1	1.23508	2.79911	-0.216399	-0.645745	-1.04859	-0.903209	-0.629453	-0.0982113	1.1619	-0.925817	-0.502538	-0.22613
YKL204W	Eap1	S(447)	GKsETSTPPPPPPGLIAHQGPQFPVMGVPPNFPQR	1	0.616586	1.07841	-0.565439	-0.700318	-0.428754	-0.855917	0.319691	0.42786	-0.5741	-0.617389	0.632017	0.667358
YKL204W	Eap1	S(30)	sQQAISNLFQK	1	-1.01814	-0.0209518	-0.157956	-0.303177	0.227084	-0.62255	0.796457	1.42946	0.262116	-1.05806	-0.109562	0.575272
YKL204W	Eap1	T(284)	GPSSItDFLNLK	1	-0.562934	-0.574542	-0.047315	-0.279521	0.355441	0.0144723	0.0219311	0.168377	0.0854682	0.257451	0.147409	0.413763
YKR018C	Ykr018C	T(389)	DSSNSEDSEDEEMDGPtLLHPGK	1	0.0872052	0.0775018	0.107878	0.265914	-0.0276884	0.269475	-0.799187	-0.857936	0.426176	-0.0649222	0.205616	0.309967
YKR023W	Ykr023W	S(487)	KNsDTVQQNR	1	0.967352	0.625045	-0.774258	-0.11789	-0.826452	0.0926615	1.90441	1.77672	-0.495264	-1.03208	-0.775785	-1.34446
YKR028W	Sap190	Y(855)	NYYNNVETNDDDyDSDDGK	1	-0.414133	-0.232409	0.687776	-0.0162859	0.451238	0.697891	-0.891278	-0.684371	0.612152	0.421813	-0.445756	-0.186639
YKR028W	Sap190	S(862)	NYYNNVETNDDDYDSDDGKsK	1	0.264409	0.122468	-0.0236994	-0.110516	0.425923	0.205556	-0.552349	-0.64936	-0.113603	0.2217	-0.000680962	0.210152
YKR028W	Sap190	S(184);S(188)	DKKEDAEEGGDSEETTNDsDHDsGDER	2	-0.388877	-0.244147	0.380756	0.529655	0.012893	0.251531	-0.247223	-0.355851	0.128164	-0.11042	0.114288	-0.0707685
YKR028W	Sap190	S(774)	EKYNTVLGDFGNDQEsDDDVIR	1	-0.27415	-0.0850625	0.180865	-0.223238	0.0237361	0.228645	-0.122184	-0.0231847	-0.0427064	0.085986	0.234439	0.0168543
YKR029C	Set3	S(680)	NEHKLsR	1	-0.418383	-0.318586	0.102902	0.0543406	0.215491	0.410771	-0.19971	-0.268015	0.418509	0.370274	-0.118809	-0.248786
YKR029C	Set3	S(206)	AsSTTISDVGDSFSTDQDNTNHR	1	-0.207854	-0.26185	0.191526	0.357255	-0.0775451	0.283858	0.0611379	-0.443047	0.0765014	0.187484	-0.0437668	-0.123699
YKR031C	Spo14	S(286)	GNNNNNTGENSDRRPsIPR	1	-0.550562	-0.266886	0.321721	0.365314	0.218748	0.348637	0.139181	-0.263195	0.078217	0.274561	-0.207306	-0.458431
YKR031C	Spo14	T(1462)	SNEGEStNVDQDIEGDEYHR	1	-0.183718	-0.345487	-0.135507	0.582795	0.00509787	0.154393	0.193658	-0.336049	0.0624786	0.103761	0.057991	-0.159413
YKR031C	Spo14	S(30)	SVTEEVDRVNsRPDELENQEVLR	1	0.0759252	0.205747	0.112079	-0.00197364	-0.34041	0.0427256	0.0214278	-0.347488	0.160963	0.095714	-0.0299848	0.00527486
YKR048C	Nap1	S(177)	AQNDsEEEQVK	1	-1.13567	-1.13687	-0.141532	-0.239853	-0.0275465	0.194483	-0.274949	0.0397333	1.02643	0.649027	0.553266	0.49348
YKR048C	Nap1	S(140)	IIsGQEQPKPEQIAK	1	-0.094717	-0.0985185	0.269139	-0.0336757	0.262649	0.323323	-0.065784	0.0639086	-0.0145091	0.16964	-0.356777	-0.424677
YKR056W	Trm2	S(55);S(56)	RLssPLTDSGNR	2	-0.211255	-0.528814	0.123623	0.306839	0.0232676	0.339014	0.161402	0.212874	0.210106	0.339117	-0.307143	-0.66903
YKR056W	Trm2	S(56)	LSsPLTDSGNR	1	-0.0489421	-0.125045	0.108202	0.313093	-0.00958591	0.193616	-0.0425296	-0.270227	0.18373	0.239662	-0.190875	-0.351099
YKR057W	Rps21A	S(65)	GEsDDSLNR	1	-0.916039	-1.1054	0.0132433	0.272247	-0.318687	-0.0414703	1.32528	1.0458	0.763996	0.882439	-0.867796	-1.05361
YKR057W	Rps21A	S(84)	NVWsYSR	1	-0.367801	-0.659094	-0.405497	-0.358654	-0.320879	-0.0864297	0.638876	0.397005	0.178708	0.479029	0.276593	0.228144
YKR057W	Rps21A	S(65);S(68)	SRGEsDDsLNR	2	-0.895889	-0.903909	0.098447	0.356959	-0.031337	0.252045	0.873596	0.760495	-0.155072	-0.577409	0.110255	0.11182
YKR062W	Tfa2	S(96);S(97)	EAGSNSSNAISLDDDDDDEDFGssPSKK	2	-0.162196	-0.302204	0.151568	-0.0174003	0.520826	0.686885	-0.0353137	-0.319859	-0.295389	0.285087	-0.179496	-0.33251
YKR067W	Gpt2	S(642);S(645)	MsVQsR	2	0.0446656	0.463627	0.00150354	0.179382	-0.0206565	0.0930855	-0.0366844	-0.192075	0.582363	0.150246	-0.571191	-0.694266
YKR067W	Gpt2	S(671);S(679)	VNSRGsLTDIPIFsDAK	2	0.647554	0.915107	-0.271111	-1.34689	-0.172058	-0.504631	-0.610597	-0.245051	0.40355	0.707486	0.00266173	0.473978
YKR079C	Trz1	S(824)	AFVEEKEEEEDVDDVEsVQDLEVK	1	-0.942442	-0.845774	-0.900654	-1.08849	-0.548219	-0.374476	1.90714	1.98181	0.0199624	0.013078	0.464215	0.313847
YKR089C	Tgl4	S(733)	RKsDTISTSR	1	-0.051985	-0.330497	0.325537	0.403783	0.127139	0.221768	-0.286163	-0.197904	0.569585	0.648337	-0.684113	-0.745488
YKR090W	Pxl1	S(193)	EQDLsPIER	1	-0.0686258	-0.0655437	0.444055	0.316219	0.0292377	0.215312	0.13661	0.213258	0.0153021	-0.00323392	-0.556579	-0.676011
YKR091W	Srl3	S(212)	SNKVDNVNVsPLR	1	0.114901	-0.221433	-0.292659	0.421924	0.253463	0.619446	-1.03193	-1.21669	-0.190864	-0.450746	1.14709	0.847498
YKR091W	Srl3	T(238)	RTQSTQENSLQEIVAIDtLLK	1	0.197644	0.14348	-0.557296	-0.509259	0.366973	-0.613856	-0.184376	-0.270118	-0.888254	-0.0505894	1.06531	1.30034
YKR092C	Srp40	T(391)	RGSYSGGSItLESGSYK	1	-1.04176	-1.04186	-0.504	-0.228478	0.0926568	-0.0468249	0.0558888	0.0540093	0.861964	0.519991	0.535252	0.743165
YKR092C	Srp40	S(127)	AREsDNEDAK	1	-0.711841	-0.739356	0.586332	0.648381	0.286184	0.579656	-0.193772	0.868335	0.493362	-0.741655	-0.460266	-0.615362
YKR092C	Srp40	T(135)	ARESDNEDAKEtK	1	-0.0877742	-0.162814	0.0591339	0.332524	0.14441	0.0280536	0.0535589	-0.0617887	-0.0924141	0.0385869	-0.0769139	-0.174562
YKR095W	Mlp1	S(333);T(337)	VIADDsKKQtPENEDLLK	2	-0.350999	-0.282557	-0.735997	-1.15538	-1.08546	-1.0148	0.471294	0.542404	1.15693	1.28461	0.544236	0.625728
YKR095W	Mlp1	S(1675)	QsAETPPKSVNNVQNPLLGLPR	1	0.355365	0.616016	-0.0945326	-0.302881	0.00353387	-0.401134	0.427012	0.457489	-0.756327	-0.63319	0.0649487	0.263701
YKR095W	Mlp1	S(1874)	IKTEDEEEKETDKVNDENsI	1	-0.035339	-0.360622	-0.171214	-0.00273891	-0.251207	-0.260101	0.326116	0.0222334	0.167457	0.549242	-0.0358134	0.0519868
YKR097W	Pck1	S(330)	SHVVDYDDSsITENTR	1	0.832302	1.56834	0.214421	0.453284	0.0766238	0.24978	-0.704842	-1.15563	0.0648063	-0.300842	-0.483312	-0.814931
YKR097W	Pck1	S(102)	TWsINR	1	1.68128	2.48468	-0.040859	-0.0653692	-0.320752	-0.358584	-0.703402	-1.15075	0.0890121	-0.0229095	-0.705281	-0.887069
YKR100C	Skg1	S(216)	QSsNENLIR	1	0.158755	0.16226	0.568357	0.629409	0.652724	0.557006	-0.380985	-0.498478	-0.122957	-0.14405	-0.875895	-0.706149
YKR100C	Skg1	S(260)	NSSITsVNKR	1	-0.0654254	0.322831	0.126214	0.127888	0.372703	-0.0769411	-0.322116	-0.248823	0.148513	-0.300813	-0.259889	0.175858
YLL008W	Drs1	S(210)	GGKDDEIDEEDDsEEAK	1	-1.61222	-1.33884	-0.662332	-0.17583	-0.065607	-0.365519	0.45172	0.780396	1.85898	1.14935	0.0294559	-0.0495602
YLL010C	Psr1	S(110)	RIsKDDLYEEK	1	-0.454078	-0.384787	0.553705	0.224551	0.202912	0.463368	-0.536517	-0.318757	0.688218	0.440735	-0.454239	-0.42511
YLL015W	Bpt1	S(885)	LLEEFDSPIDNGNEsDVQTEHR	1	0.0604208	0.0944763	0.0552862	-0.185066	-0.14227	-0.103363	-0.111496	0.00551775	-0.0956675	0.123144	0.233726	0.0652913
YLL018C	Dps1	S(30)	AVEESAEPAQVILGEDGKPLsK	1	0.106305	-0.719777	-1.5486	-1.52449	-1.55937	-0.348982	2.38867	2.00122	0.423137	0.782578	0.189856	-0.190545
YLL021W	Spa2	S(1060)	KLASSGEVDKIEsPR	1	-0.0156867	-0.144868	0.00309286	-0.0462983	-0.117052	0.0681917	0.236856	0.305879	-0.00453856	0.127352	-0.102672	-0.310257
YLL021W	Spa2	S(301)	ELTDLNsDLHLQIEDLNAK	1	-0.308945	-0.103232	-0.692105	-2.84018	-0.643937	-0.41	1.13345	1.583	0.273495	1.00332	0.238043	0.7671
YLL021W	Spa2	S(1087)	MEsPNLK	1	-0.0571608	-0.0753512	-0.0327087	-0.236421	-0.14702	0.121341	0.0950966	0.0723322	0.235837	0.479908	-0.0940434	-0.361808
YLL021W	Spa2	S(254)	NYWDVNDsPIIK	1	-0.427342	-0.360665	-0.0636357	-0.353392	0.128719	0.342073	0.39837	0.44224	0.22569	0.511543	-0.261802	-0.5818
YLL021W	Spa2	S(1042)	IAAQESIKsPEAAR	1	0.632606	0.42477	-0.0438293	0.0197912	-0.174564	0.0395986	-0.570456	-0.472291	-0.0260564	-0.130933	0.1823	0.119064
YLL021W	Spa2	S(599)	AINsPIIRPSSSNGVPTTSR	1	0.352096	0.586981	-0.252631	0.0744014	0.0596796	-0.372404	-0.124173	0.119765	-0.188279	-0.844379	0.153308	0.435636
YLL021W	Spa2	S(575);S(585)	KPAsFLNDVEEEEsPVKPLK	2	-0.925918	-0.539276	-0.326515	-0.300749	0.191936	-0.548254	0.360138	0.916897	0.327074	0.192895	0.373285	0.278487
YLL021W	Spa2	S(883)	NFQEPLGDVEsPDMTQK	1	0.452124	0.801463	0.150197	-0.483335	-0.201201	0.0545294	-0.358703	-0.291696	0.0336745	0.0604402	-0.076092	-0.141402
YLL022C	Hif1	S(174)	LALHELANFsPANEHDDEIEDVSQLR	1	0.224245	0.383204	0.210504	0.324811	0.02229	-0.566857	-0.166076	0.196592	-0.26425	-0.66872	-0.0267133	0.330972
YLL029W	Fra1	S(56)	RAsLFLR	1	-1.20838	-1.15341	-0.154086	-1.6943	-0.880758	-0.267353	0.576335	0.755808	1.09043	1.5339	0.576465	0.825356
YLL029W	Fra1	S(92);S(95)	GAGGGSSAGNGSVYsCDsLCAVNR	2	-0.522385	-0.521692	-0.0256108	0.0101104	-0.386318	-0.187315	-0.152288	-0.443978	0.693632	0.698044	0.392969	0.444832
YLL032C	Yll032C	S(762)	TTIDNTSQSGAsPQR	1	-0.198444	-0.195268	0.890109	0.424454	0.407711	0.643113	-0.267432	-0.357058	-0.411659	-0.0191143	-0.420285	-0.496126
YLL038C	Ent4	T(206)	TRNtHEYAR	1	-0.481267	-1.37732	-0.312303	0.210479	-0.0339187	-0.326231	0.0728763	0.139111	0.224062	0.689885	0.53055	0.664072
YLL038C	Ent4	S(167)	STDNsHLK	1	-0.519057	-0.620306	-0.132918	0.145079	-0.175729	-0.0371651	0.0907452	0.125241	0.413165	0.0949956	0.323794	0.292156
YLL040C	Vps13	S(1364)	SPsPDPASFSSESER	1	0.429614	0.620632	0.418157	0.393	-0.156497	-0.110199	-0.2404	-0.296527	-0.244228	-0.254608	-0.206647	-0.352298
YLL043W	Fps1	S(212)	TTGAQTNMESNEsPR	1	-1.27925	-1.32546	0.697504	0.349635	0.26633	0.588371	-0.689816	-1.25172	0.655412	1.0603	0.349817	0.578882
YLL043W	Fps1	T(184)	AtSNAGHSANTGATNGR	1	-0.502792	-0.827028	0.296528	1.00724	0.111651	0.471566	-0.650091	-0.754754	0.0974633	-0.155419	0.647241	0.258397
YLL043W	Fps1	S(175)	NADDAHTIPESHLsR	1	-0.528696	-0.461026	0.133386	0.754723	0.183011	0.329663	-0.481267	-0.834634	0.0877898	-0.11289	0.605776	0.324164
YLL043W	Fps1	S(209);S(212)	TTGAQTNMEsNEsPR	2	-1.79418	-1.8501	1.54858	1.64807	1.7469	2.27781	-1.31331	-2.41187	-0.767961	-0.896334	0.579979	1.23242
YLL043W	Fps1	S(573)	RTSDLsDFSYNNDDDEEFGER	1	-0.0499936	0.0814799	0.547853	0.535099	-0.0376704	0.472407	-0.256643	-0.554626	0.165367	0.00582317	-0.368913	-0.540183
YLL048C	Ybt1	S(944);S(945)	ANssANLAAK	2	-0.774078	-0.81195	-0.54301	0.359459	-0.438911	0.0865086	1.23442	0.678801	0.616673	0.2578	-0.0950917	-0.57062
YLR002C	Noc3	S(105);S(108);S(109)	AQEKPKDDDEEDEDsNDssEDDEGPNEEQEAEAK	3	-0.66041	-1.02897	0.295992	0.245824	0.398862	1.12793	-0.427857	-0.418872	0.748228	0.903561	-0.354816	-0.829466
YLR003C	Cms1	S(59)	EERNsEDDSNRPVSK	1	-0.866018	-0.764097	0.453954	0.275046	0.239438	0.801671	-0.344866	-0.413143	0.673503	0.467163	-0.15601	-0.36664
YLR005W	Ssl1	S(7);S(9)	APVVIsEsEEDEDR	2	-0.331552	-0.368272	0.329623	0.0309823	0.243799	0.401921	-0.25616	-0.0491884	0.242441	0.209733	-0.228153	-0.225176
YLR005W	Ssl1	S(7)	APVVIsESEEDEDR	1	-0.0827622	-0.0668777	0.486506	0.391521	0.358982	0.576841	-0.494476	-0.486622	-0.161126	-0.245501	-0.107125	-0.169361
YLR006C	Ssk1	S(351)	DGNSsPQEFK	1	0.136252	0.0417817	0.292318	-0.0438592	-0.0922384	0.120429	0.0885101	0.0613132	0.0480556	0.246582	-0.472897	-0.426246
YLR006C	Ssk1	S(195);Y(197)	FASVsPyPK	2	0.247931	0.555883	-0.30305	-0.549504	-0.933704	-0.612448	1.2509	0.973851	0.356494	0.428186	-0.618575	-0.795969
YLR025W	Snf7	S(213)	IKQSENsVKDGEEEEDEEDEDEK	1	-0.741983	-0.771122	-0.477673	-0.36572	-0.393483	-0.159353	1.09156	0.956294	0.49679	0.417231	0.0247931	-0.0773304
YLR025W	Snf7	S(119)	TIHsGLDIDKVDETMDEIR	1	-0.418835	-0.303418	-0.272509	-0.162502	-0.11776	-0.282501	0.722661	0.885314	0.249634	0.00263075	-0.16319	-0.139523
YLR044C	Pdc1	S(251)	GsIDEQHPR	1	-0.466859	-0.722352	-0.14218	0.336745	0.00283107	0.0418558	0.400161	0.2646	0.493373	0.662566	-0.287326	-0.583415
YLR044C	Pdc1	S(526)	LTQDKsFNDNSK	1	-0.724716	-0.746439	-0.049758	-0.493626	-0.182345	0.163018	0.350413	0.500367	0.730137	0.727789	-0.123731	-0.151108
YLR045C	Stu2	S(813)	RSsESIGDLPHR	1	-0.17249	-0.383012	0.334963	0.334495	0.0111513	0.401275	-0.0523491	-0.226731	-0.0811883	-0.0417983	-0.0400875	-0.0842289
YLR055C	Spt8	T(83)	tATPTNEHQHDEQK	1	-0.198497	-0.0377795	0.328926	0.324588	0.162077	0.288497	0.0942113	-0.20212	-0.109114	0.0691712	-0.277604	-0.442357
YLR072W	Lam6	T(343)	SVDDYMGtPR	1	-0.10999	-0.143113	0.186225	0.327936	-0.205614	0.0413362	-0.278948	-0.314337	0.314715	0.16167	0.0936114	-0.0734918
YLR075W	Rpl10	S(205)	KGsLENNIR	1	-0.504043	-0.572213	-0.285329	-0.0454675	-0.159415	0.0545489	0.875645	0.658984	0.467149	0.54858	-0.394006	-0.644432
YLR079W	Sic1	S(201)	SQEsEDEEDIIINPVR	1	0.522026	0.581555	-0.484809	-0.263313	-0.564569	-0.547789	-0.647825	-0.616163	0.862424	0.6122	0.312752	0.233509
YLR079W	Sic1	S(191)	NWNNNsPK	1	0.357729	0.505156	-0.0730916	-0.139683	-0.480729	-0.238138	-0.453457	-0.970954	0.558328	0.527814	0.0912209	0.315805
YLR096W	Kin2	S(803)	LQINDNDNNNVNAVVDGINNDNSDHYLsVPK	1	-0.211895	-1.2006	-0.653897	-1.12653	-0.26162	-0.00546279	0.999034	1.83956	0.254948	0.521366	-0.126571	-0.0283275
YLR096W	Kin2	S(151)	NEsEILER	1	-0.827673	-0.981062	-0.0945572	0.0337566	-0.492704	-0.174646	1.05227	0.840147	0.496236	0.697366	-0.133569	-0.415562
YLR096W	Kin2	T(26)	GGSLSPtPEAFNDTR	1	0.0450554	0.0352405	-0.164831	-0.141521	0.00704356	-0.0898285	0.174707	0.210464	0.0313153	0.17798	-0.0932903	-0.192335
YLR096W	Kin2	T(1031)	GQNNIPLtPLATNTHQR	1	-0.397304	-0.605706	-0.0416998	0.200057	0.11722	0.08547	-0.0406167	0.207148	0.146339	-0.0626803	0.216063	0.175712
YLR096W	Kin2	T(611)	LTIPEQAHTSPtSR	1	0.0578485	0.193149	-0.253308	-0.035034	0.00296115	0.134956	-0.159055	-0.218386	0.0327578	-0.0807344	0.318796	0.00604935
YLR098C	Cha4	S(123)	NNsDHGDAPNEK	1	-0.234329	-0.0988	0.286723	0.53455	0.112153	0.342807	-0.541682	-0.901439	-0.0414288	-0.359802	0.418564	0.482684
YLR103C	Cdc45	S(463)	INNDNNDDTDGEEEEDNsAQK	1	0.0747753	0.179538	0.362336	0.196412	0.319376	0.613771	-0.156336	-0.533679	-0.398566	-0.292631	-0.201585	-0.163411
YLR106C	Mdn1	S(4555)	ELVEDADDEKMDIDEEEMLsDIDAHDANNDVDSK	1	-0.768054	-0.512011	0.140163	-0.350612	0.0329569	0.355159	-0.129798	0.246617	0.55947	0.233518	0.165262	0.0273284
YLR106C	Mdn1	S(4568)	ELVEDADDEKMDIDEEEMLSDIDAHDANNDVDsKK	1	-0.181216	-0.113462	-0.0296207	-0.606776	-0.0731395	-0.207797	0.0125042	0.509754	0.297987	0.268466	-0.0265152	0.149815
YLR113W	Hog1	Y(176)	IQDPQMTGyVSTR	1	0.515263	0.375733	-0.413606	0.308531	-0.393591	0.203552	1.75961	1.40474	-0.671546	-1.33668	-0.796133	-0.955876
YLR114C	Avl9	S(516)	NGHQSEEDIKDQESIEsK	1	-0.218075	-0.134667	0.439576	0.439506	0.100008	0.206412	-1.06783	-0.757462	-0.0318501	-0.196952	0.778168	0.443163
YLR114C	Avl9	S(513);S(516)	NGHQSEEDIKDQEsIEsKK	2	0.697336	0.349579	0.068635	0.100043	0.251653	0.192922	-0.811397	-0.334334	-0.195564	-0.26308	-0.0106633	-0.045129
YLR133W	Cki1	T(54)	TISIESDVSNItDDDDLR	1	-0.606719	-0.0315373	-0.382154	-0.203026	-0.134552	0.303323	0.427437	-0.574022	-0.285134	-0.25153	0.981124	0.756792
YLR133W	Cki1	S(30)	RHsLTR	1	-0.90181	-0.915353	-0.316837	1.14579	-0.0784552	-0.19807	0.174716	0.0151577	0.524832	0.0856498	0.597554	-0.13317
YLR133W	Cki1	S(45)	TIsIESDVSNITDDDDLR	1	0.0310919	0.0187732	-0.284665	0.421653	0.0546736	-0.286687	-0.0532348	-0.204194	0.137474	-0.00292026	0.11466	0.0533749
YLR138W	Nha1	S(568)	sKNEMYDDDELNDLGR	1	-1.03704	-1.19172	-1.12654	-0.814331	-0.347615	-0.296744	0.851735	0.954725	0.912836	0.997859	0.746625	0.350217
YLR149C	Ylr149C	S(651)	AFESFLRPPSTPDLPsDDDNFAANSR	1	0.434437	1.13139	-0.470222	-1.19687	-0.198902	-0.721854	0.480824	1.14975	-0.424079	-0.972148	0.177943	0.609734
YLR150W	Stm1	S(118)	ELsAEK	1	0.117961	0.560328	0.211124	-0.235613	-0.543645	-0.51276	-0.641304	-0.40125	1.03348	0.78546	-0.177614	-0.196166
YLR167W	Rps31	S(122)	ECsNPTCGAGVFLANHK	1	-0.126496	-0.347575	-0.901676	-0.575127	-0.770697	-0.0570281	1.52336	1.27165	0.167546	-0.247125	0.107958	-0.0447942
YLR175W	Cbf5	T(402)	EYVPLDNAEQSTSSSQEtK	1	-0.9435	-0.59097	0.620046	0.0937251	0.23967	0.491635	-0.0924918	0.148068	0.408749	0.279047	-0.232474	-0.421505
YLR175W	Cbf5	T(378)	VNENtPEQWK	1	0.130052	-0.28071	-0.440109	-0.3968	-0.619852	-0.461913	0.505374	0.361678	0.578325	0.948223	-0.153791	-0.170479
YLR177W	Ylr177W	T(246)	RNTQPVLNLHPAAAPtNDAGLAVVDGK	1	-0.489412	-0.482327	-0.371469	-0.438591	-0.672599	-0.492702	-0.0898965	0.226538	0.751708	0.315839	0.871668	0.871242
YLR181C	Vta1	S(72)	EIGGESEAEDsDK	1	-0.526607	-0.77007	-0.366689	-0.327618	-0.240871	-0.235563	-0.413458	-0.531039	0.364285	0.543031	1.18334	1.32126
YLR181C	Vta1	S(196)	TLDYADFADDSEEIKDEDVDHQTsDLENNNNDK	1	-0.207323	-0.0770544	0.365035	0.00443118	0.00180052	0.318833	-0.50378	-0.606856	0.239233	0.209796	0.105033	0.15085
YLR182W	Swi6	S(160)	ELGsPLKK	1	0.239699	-0.145451	0.269109	0.211788	0.348588	0.42546	-0.457146	-0.267832	-0.268613	0.0120204	-0.131638	-0.235986
YLR187W	Skg3	S(580)	ITDsNLENMEDVEAK	1	-1.05773	-1.05374	-0.824098	-1.17623	-0.502362	-0.532999	0.975833	1.0621	0.587988	0.94224	0.820372	0.75863
YLR187W	Skg3	S(709)	NEDLGSLKEFEELsQK	1	-0.348574	0.171775	0.0727475	-0.2345	0.00781469	-0.486124	0.0958199	0.0487393	-0.00343868	-0.34366	0.17563	0.84377
YLR187W	Skg3	S(488)	QMEsPQK	1	0.234388	-0.0472238	0.642896	0.595217	0.673535	0.738584	-0.519381	-0.548025	-0.569106	-0.327777	-0.462331	-0.410776
YLR187W	Skg3	S(597)	SANEFsTTPEDK	1	0.384963	0.650444	0.814725	0.572315	0.5071	0.689584	-0.788764	-0.884289	-0.335149	-0.526737	-0.582875	-0.501317
YLR189C	Atg26	S(476)	SNsWFR	1	-0.515081	-1.13987	-0.449994	-0.258522	-0.0390445	-0.0659046	-0.410225	-0.237612	0.75099	0.850745	0.663353	0.851159
YLR196W	Pwp1	Y(122)	GEDPyISLPNQEDSQEEKQELQVYPSDNLVLAAR	1	-0.751472	-0.729645	-0.688864	-1.17037	-0.723045	-0.497803	2.08862	2.65717	0.225749	-0.156649	-0.150985	-0.102699
YLR219W	Msc3	S(80)	RLsTSSAAPPTSR	1	-0.248033	-0.614515	-0.0109369	0.638306	0.0541648	0.177651	0.182697	-0.10412	0.304257	0.357957	-0.282148	-0.455278
YLR219W	Msc3	T(174)	TQSItK	1	-0.21936	-0.633546	-0.248894	-0.0726615	-0.319152	-0.217773	0.362227	0.732631	0.575391	0.529429	-0.150212	-0.33808
YLR219W	Msc3	S(127)	MNsMTSGANVR	1	-0.179664	-0.965902	-0.299317	-0.428706	-0.311936	0.0331007	0.315208	0.333559	0.437242	1.17825	0.0384661	-0.1503
YLR219W	Msc3	S(660)	SSSsLLQDQTPQR	1	0.11944	0.137545	0.523583	0.449232	0.347924	0.263571	-0.8204	-0.332079	0.210524	0.171069	-0.381071	-0.689338
YLR220W	Ccc1	S(61);S(68)	NsAQDLENsPMSVGKDNR	2	-0.445048	-0.204618	0.214984	0.391764	-0.541536	0.25743	0.15532	-0.470592	0.871248	0.36076	-0.254967	-0.334743
YLR220W	Ccc1	S(81)	NGDsGSDNEKTNLGFFQSVDPR	1	0.26693	0.869871	-0.18024	-0.908342	-0.429618	-0.368778	0.204048	0.450812	0.0301563	-0.89328	0.108724	0.849717
YLR220W	Ccc1	S(61);S(71)	NsAQDLENSPMsVGKDNR	2	-0.218229	-0.197406	0.2345	-0.0647512	-0.501032	-0.0795064	0.207789	-0.148267	0.343462	0.620436	-0.0664907	-0.130505
YLR221C	Rsa3	S(92)	GNDEDKQEDIAIEVSDVELTDEEsKDLK	1	0.72876	0.978417	0.376303	0.551972	0.738716	-0.13366	-0.381816	0.0466183	-1.17986	-0.818119	-0.282107	-0.625229
YLR221C	Rsa3	S(83)	GNDEDKQEDIAIEVsDVELTDEESKDLK	1	0.272441	1.22498	-0.0599413	0.790836	0.318871	0.058513	-0.00787888	-0.0440286	-0.458545	-1.19612	-0.0649469	-0.834183
YLR223C	Ifh1	S(511)	TTSNVDNDEYIFNVFFQSDDENsGHK	1	0.157172	1.02038	-0.148873	-0.799154	-0.0186032	-0.965363	0.33401	0.540803	-0.714244	-1.04739	0.390538	1.25073
YLR223C	Ifh1	T(757)	AQtPDVK	1	0.273814	-0.157707	0.0460166	0.45821	-0.0218257	0.220768	-0.0940443	-0.214055	-0.219485	-0.118634	0.0155242	-0.188582
YLR226W	Bur2	S(24)	FQAVPKPTSNAsPPPASSGFNAR	1	1.02307	1.50338	-0.548674	-0.753626	-0.793621	-0.839711	0.625382	0.741606	-0.0500238	-0.72586	-0.256136	0.0742156
YLR248W	Rck2	S(186)	AIPAKNsSNEFLTK	1	0.232177	0.112009	-0.14642	-0.313535	-0.634992	-0.522068	0.501646	0.763525	0.389253	0.365316	-0.341664	-0.405247
YLR249W	Yef3	Y(638)	AyEELSNTDLEFKFPEPGYLEGVK	1	-0.257967	-0.611767	-0.812294	-1.35115	-0.438158	-0.304548	1.59919	1.95045	0.151036	0.784629	-0.24181	-0.467615
YLR249W	Yef3	Y(1037);S(1040)	KKELGDAyVSsDEEF	2	0.330573	-0.1046	-0.328236	0.220769	0.324678	0.212243	0.306377	-0.107358	-0.535122	-0.221583	-0.0982702	0.000530008
YLR249W	Yef3	S(1015)	KLsSAELR	1	-0.0773366	-0.25734	0.209073	0.646028	0.173217	0.245398	0.790587	0.806578	-0.448642	-0.403122	-0.646898	-1.03754
YLR256W	Hap1	S(756)	sGSNPVNK	1	-0.259273	-0.142909	0.00380322	0.210891	-0.540088	-0.153284	-0.149055	0.0848977	1.02423	0.619538	-0.079619	-0.619133
YLR257W	Ylr257W	S(66)	DDDIRDRsYTSVAELNR	1	-0.615946	-0.536641	-0.283718	-0.119369	-0.254603	-0.2572	0.751038	1.13462	-0.110647	-0.650059	0.513876	0.428654
YLR257W	Ylr257W	S(15)	GSTPCLIGDsIR	1	-0.00309296	-0.285126	-0.691486	-0.396156	-0.487309	-0.698722	0.62768	0.917857	0.132762	0.260144	0.421445	0.202003
YLR257W	Ylr257W	S(121)	NKsINSESFSSPSLR	1	-0.797815	-1.24169	-0.661457	-0.303618	-0.194543	-0.32299	0.118259	0.132594	0.675013	0.688099	0.860543	1.04761
YLR257W	Ylr257W	T(246)	SISRGPtK	1	-0.543281	-1.257	-0.670244	-0.345088	-0.683852	-0.4561	0.740233	0.617577	0.582488	0.822491	0.574656	0.618117
YLR258W	Gsy2	S(651);S(655)	VARPLsVPGsPR	2	0.0750285	0.0905665	0.0859036	0.229816	-0.307089	-0.17068	-0.161	-0.195326	0.587979	0.442409	-0.280822	-0.396787
YLR258W	Gsy2	S(651)	VARPLsVPGSPR	1	-0.584171	-0.523756	-0.147854	-0.143058	-0.592306	-0.268222	0.675535	0.751502	0.971039	0.909279	-0.322243	-0.725745
YLR258W	Gsy2	S(655)	VARPLSVPGsPR	1	0.753843	0.982966	-0.0429568	-0.0912489	-0.243654	-0.403877	-0.322689	-0.114184	-0.232088	-0.625799	0.0875448	0.252144
YLR260W	Lcb5	S(55)	SRSsIDNISR	1	-0.335216	-0.407933	0.462361	0.695163	0.544145	0.537153	-0.3574	-0.386245	-0.184729	-0.254274	-0.129161	-0.183864
YLR267W	Bop2	S(383)	FKYDETTFSGsPER	1	-0.0242154	-0.000333057	-0.754641	-0.585438	-0.806033	-0.699166	0.00545111	-0.0241358	1.58782	1.73092	-0.00838118	-0.421847
YLR270W	Dcs1	S(60)	RPsQDGR	1	-1.14572	-0.524055	0.332255	-0.252768	-0.0754702	0.00498754	-1.28231	-0.54002	1.06802	-0.296071	1.10323	1.60793
YLR272C	Ycs4	S(464)	KVEsQETLNDTIER	1	-0.0292357	-0.0288831	-0.106258	0.406226	0.0603042	0.226755	0.666691	0.320516	-0.351501	-0.424606	-0.240001	-0.500009
YLR278C	Ylr278C	S(1141)	DVEESNFsTSPLR	1	0.434274	0.0667129	0.0317943	0.0642734	-0.0649203	0.0736084	-0.624223	-0.447497	-0.107898	0.0593662	0.330973	0.183536
YLR278C	Ylr278C	T(1093)	EQPQQHItSPQR	1	0.0535349	-0.0290578	0.0864188	0.823309	0.318989	0.479264	0.0165294	-0.530556	-0.386463	-0.500965	-0.0890091	-0.241994
YLR310C	Cdc25	S(135)	KHsHPMK	1	-0.383149	-0.10403	0.195577	0.373547	-0.0209975	0.135806	-0.446156	-0.145733	0.593707	0.176945	0.0610189	-0.436535
YLR310C	Cdc25	S(596)	NVsTSTTDTLTPMR	1	-0.611744	-0.517281	-0.254254	-0.33913	0.306398	0.16824	-0.275416	-0.401486	0.490192	0.600714	0.344824	0.488945
YLR314C	Cdc3	S(175)	DYEEELANDQEEEEGQGEGHENQsQEQR	1	0.118338	0.388005	0.140908	0.112218	0.0722272	-0.164828	0.125609	0.0886948	-0.435133	-0.569202	-0.021949	0.145113
YLR314C	Cdc3	S(509);T(513)	QLELSINSASPNVNHsPVPtK	2	1.19096	1.3582	-0.337976	-0.933743	0.0588545	-0.861694	0.675998	1.02946	-1.3897	-1.05869	-0.19814	0.466466
YLR319C	Bud6	S(343)	TPLPIENVRAsPR	1	0.178821	0.25184	-0.831299	-0.131911	-0.262398	-0.0476272	-0.0855682	-0.405243	0.165878	-0.256259	0.834566	0.589201
YLR319C	Bud6	T(169)	EGtPLSSR	1	-0.182465	-0.0583741	0.276997	0.299306	0.291806	0.538257	-0.391485	-1.05779	0.0507207	0.089247	-0.0455735	0.189356
YLR319C	Bud6	S(690)	SKsNPILPIMRPGTFNQVR	1	-0.0670321	0.415522	-0.119111	-0.563255	0.242118	-0.213322	0.277319	0.412359	-0.460637	-0.317145	0.127343	0.265841
YLR323C	Cwc24	S(33)	LVAsDEEK	1	-0.425689	-0.335486	0.42777	0.0862554	0.379301	0.573719	-0.454508	-0.322278	0.22472	0.0972327	-0.151593	-0.0994435
YLR323C	Cwc24	S(105)	RPsDDNELVLNMSGK	1	0.116612	0.595036	0.0785373	-0.335643	0.133347	-0.49462	-0.386882	0.099039	-0.180321	-0.682282	0.238705	0.818469
YLR324W	Pex30	S(52)	NEAESGVSEDNDNGsLEK	1	-0.337472	0.159758	0.540216	-0.28493	-0.179652	0.224715	0.30895	0.0764261	0.766581	0.732287	-1.09862	-0.908257
YLR327C	Tma10	S(28)	YFTHNGNFGEsPNHVK	1	-0.637627	-1.0483	-0.694522	-0.776664	-0.687682	-0.251066	1.22251	1.55545	0.65198	0.740189	0.145342	-0.219614
YLR327C	Tma10	S(69)	RGsNSQNNER	1	-2.1206	-1.21243	-0.899389	0.065992	0.100125	-0.49324	0.386685	0.278917	2.93524	1.23767	-0.402062	0.123094
YLR327C	Tma10	Y(84)	RLSDLQQyHI	1	0.354238	-0.109015	-0.346707	-0.984645	-0.337597	-1.16411	-0.0542431	0.840423	-0.1879	0.127379	0.572209	1.28996
YLR327C	Tma10	S(79)	RLsDLQQYHI	1	0.241134	-0.403391	-0.561547	-0.739791	-0.40961	-0.836196	-0.166549	0.745496	0.239056	-0.0188487	0.657516	1.25273
YLR328W	Nma1	S(95);S(96)	HQHIPLNQDDFQPLSAEVssEDDDADFR	2	-0.302174	0.479933	0.427634	-0.0111567	0.269538	0.112077	0.114348	0.224027	0.286152	-0.493536	-0.795498	-0.311343
YLR328W	Nma1	S(26)	APDFKPPSADEELIPPPDPEsK	1	-0.00408931	-0.0613497	-0.272614	-0.503025	0.0726438	-0.210169	0.60029	0.669212	-0.106348	0.270139	-0.289883	-0.164807
YLR328W	Nma1	S(111)	ERYGsDSTTESETR	1	-0.0940038	0.392629	0.468501	1.04336	0.309072	0.840061	0.125867	-0.797657	-0.366777	-0.702824	-0.442659	-0.775572
YLR328W	Nma1	S(91);S(95);S(96)	HQHIPLNQDDFQPLsAEVssEDDDADFR	3	0.117373	0.31241	-0.315838	-0.131355	0.106478	-0.114178	0.0401189	0.0301432	-0.201298	-0.0689175	0.253166	-0.0281026
YLR330W	Chs5	S(553)	NAGEPVQETNEFTTDIAsPR	1	0.223519	0.406908	-0.103445	-0.305574	-0.00087989	-0.366276	-0.650387	-0.81139	0.212507	0.431424	0.318686	0.644907
YLR332W	Mid2	S(372)	FYDEQGNELsPR	1	0.301118	0.333065	0.376456	0.628376	0.30139	0.294271	-0.655902	-0.873009	-0.0884318	0.00654455	-0.234631	-0.389247
YLR335W	Nup2	T(585)	SGQTTTNDSKEESTTEATGNESQDAtK	1	-0.769757	-0.445647	-0.125551	-0.692149	0.0526041	0.373549	0.552159	-0.0435889	-0.000478193	0.375881	0.291023	0.431955
YLR335W	Nup2	S(84)	VDGTGEAQVDNsPTTESNSR	1	-0.332416	-0.381409	-0.260465	-0.201646	-0.0360673	0.384742	0.636484	0.231068	-0.0465928	0.146957	0.0390568	-0.179713
YLR335W	Nup2	S(205)	KKDESDsENDIEIKGPEFK	1	0.84017	0.721413	0.311433	0.0925498	0.141325	-0.119614	-0.296163	-0.135206	-0.861589	-0.388843	-0.135177	-0.1703
YLR335W	Nup2	S(203)	KKDEsDSENDIEIK	1	0.312998	-0.358154	0.35907	0.410566	0.294353	0.512119	-0.296907	-0.209305	-0.258457	-0.049277	-0.411057	-0.305948
YLR337C	Vrp1	S(703);S(709)	sPPPPPsPSTMDTGTSNSPSK	2	-0.394201	-0.407286	-0.133204	-0.19539	0.201914	0.0382127	0.336374	0.597349	0.137328	0.0528476	-0.148211	-0.085733
YLR337C	Vrp1	T(701);S(703)	NPtKsPPPPPSPSTMDTGTSNSPSK	2	0.867932	1.33071	0.123082	0.44353	0.340327	-0.0360907	-0.584625	-0.946823	-0.179203	-0.467429	-0.567512	-0.323899
YLR337C	Vrp1	S(703)	sPPPPPSPSTMDTGTSNSPSK	1	0.21253	0.247743	0.2265	0.285625	0.290731	0.0540145	0.112076	0.288009	-0.292985	-0.566666	-0.548852	-0.308726
YLR345W	Ylr345W	S(6)	PNVLsDDEELLNGLGSEIMKPSR	1	1.01658	2.20224	0.195136	-0.0686935	0.0681022	-1.74483	-1.0403	-0.52888	-0.301297	-1.11439	0.0617796	1.25455
YLR355C	Ilv5	S(355)	sLEFNSQPDYR	1	-0.271613	-0.205989	0.375791	0.314748	0.437455	0.402591	-0.242536	-0.265268	-0.228851	-0.215647	-0.0702451	-0.0304349
YLR357W	Rsc2	S(190)	REsEPGTDTNNDEDYEATDMDIDNPK	1	0.0615677	-0.148099	-0.579511	-0.27446	-0.588974	-0.130983	0.792434	1.13716	0.479447	-0.47325	-0.164965	-0.11037
YLR362W	Ste11	S(344)	RPLsAESNNIGDILLK	1	0.545236	0.424879	-0.217295	0.00489499	0.018747	0.0473612	-0.386701	-0.612391	-0.240191	-0.327489	0.280204	0.462745
YLR362W	Ste11	S(486)	QANsDENNEQEEQQEK	1	-0.149239	0.386509	0.58131	0.261448	0.227921	0.533813	-1.28599	-1.43324	0.404496	0.0337428	0.221502	0.217731
YLR371W	Rom2	S(76)	RRsGVEAAIDDSDIPNNEMK	1	-0.330695	-0.741657	-0.300504	-0.0747469	0.178827	0.361089	-0.199981	-0.182719	0.449291	0.662801	0.203061	-0.0247673
YLR371W	Rom2	S(207)	QSsFSTGSASTTPTQAR	1	-0.32469	-0.321695	0.141643	0.788451	-0.133111	0.063425	0.338489	-0.0225334	0.168002	-0.165084	-0.190334	-0.342564
YLR377C	Fbp1	S(12)	RDsTEGFDTDIITLPR	1	1.85823	2.06499	-0.214076	-0.196301	-0.44989	-0.550238	-0.641002	-0.591651	-0.159337	-0.484065	-0.393921	-0.242732
YLR386W	Vac14	S(772)	ENSNFCDsNSDISQR	1	0.196222	0.39354	0.640358	0.444448	0.132194	0.452343	-0.170287	-0.502546	0.0268076	-0.227958	-0.825295	-0.559827
YLR386W	Vac14	S(772);S(774)	ENSNFCDsNsDISQR	2	-0.272477	0.035594	0.659694	1.0142	0.365223	0.633662	-0.414437	-0.515773	0.309381	-0.575604	-0.647383	-0.592076
YLR398C	Ski2	S(209)	GIKPMDsPAENEDQNGQFK	1	0.232795	0.268841	0.176871	-0.414148	0.201819	0.372598	0.0375136	-0.0547357	-0.495631	-0.101928	-0.153367	-0.0706279
YLR399C	Bdf1	S(615)	DASSLsPTSAGSR	1	-0.0526124	0.097959	0.555091	0.838954	0.177293	0.430811	-0.398203	-0.728089	-0.0841014	-0.229716	-0.197468	-0.409919
YLR399C	Bdf1	S(270)	RSsAQEDAPIVIR	1	-0.302129	-0.538162	0.36134	0.305641	0.117752	0.43641	-0.277122	-0.445438	0.0620093	0.25853	0.0381501	-0.0169807
YLR399C	Bdf1	S(429)	WADRPNLDDYDsDEDSR	1	-0.364341	-0.0507355	0.516362	0.444839	0.201469	0.351724	-0.337252	-0.572196	0.163721	0.125577	-0.179959	-0.299209
YLR403W	Sfp1	S(170)	RPsVSNPPYHR	1	-0.688049	-0.879037	-0.0293466	0.481915	0.0847973	0.362093	-0.28849	-0.260487	0.663837	0.343209	0.25725	-0.0476944
YLR405W	Dus4	S(361)	SAsVVER	1	-0.614855	-0.994913	0.0350662	0.0233876	0.116642	0.219861	-0.268783	-0.164764	0.412713	0.610579	0.319217	0.305849
YLR410W	Vip1	S(1111)	FTPVNITSPNLsFQK	1	0.419204	0.387432	-0.242121	-0.905406	-0.285475	-0.437594	-0.259372	-0.220602	0.208768	0.76901	0.158995	0.407161
YLR413W	Ina1	S(665)	IIEEHEsPIDAEK	1	-0.225262	-0.0926147	0.644503	0.529258	0.1779	0.54102	-1.30715	-1.53834	-0.148975	-0.378954	0.858982	0.939631
YLR413W	Ina1	S(657)	AVQESDSTTsR	1	-1.23699	-1.77758	-0.0504553	1.85487	-0.554386	-0.35507	-0.905714	-1.76502	0.622384	0.134984	2.12516	1.90782
YLR419W	Ylr419W	S(816)	ALSYDDDsVDER	1	-0.57245	-0.683377	-0.036342	0.14347	-0.110105	-0.0594882	0.48981	0.708375	0.231771	0.187174	-0.00268369	-0.296153
YLR419W	Ylr419W	S(561)	SIsNSSSR	1	-0.0450847	0.1765	0.193112	0.199244	0.229517	0.468673	-0.0237716	0.0856677	-0.249454	-0.616563	-0.104319	-0.313522
YLR419W	Ylr419W	S(563)	SISNsSSR	1	0.0134272	-0.145651	0.166258	0.789864	0.277802	0.549412	-0.2383	-0.11759	-0.138033	-0.532343	-0.0811544	-0.543692
YLR429W	Crn1	T(520)	IETPVtPTETK	1	-0.48651	-0.419071	-0.0468736	-0.189696	0.190667	0.509558	0.350667	0.394702	0.620702	0.601331	-0.628652	-0.896825
YLR429W	Crn1	T(581)	SATPPSSItAAK	1	0.415054	0.957859	-0.0941106	-0.122648	-0.287751	-0.678338	0.136182	0.354976	-0.146624	-0.836486	-0.0227501	0.324637
YLR429W	Crn1	S(485)	KSsDIDQVNNAEDPSR	1	-0.687493	-0.376276	0.363	0.30989	-0.23066	-0.0236642	0.139352	0.280772	0.577931	0.18874	-0.16213	-0.379462
YLR443W	Ecm7	S(429);S(432)	FRSsNDsEESMQR	2	0.290139	0.0924575	0.518291	1.01817	0.256831	0.606807	-0.142872	-0.505728	-0.31265	-0.389499	-0.609738	-0.822204
YLR449W	Fpr4	S(80);S(82)	GEYYNQDNNDGLEEDEsEsEQEADVPKR	2	-0.0429731	-0.561759	-0.774488	0.123784	0.417673	0.270143	0.0602846	0.210847	0.0613001	0.247515	0.278203	-0.290531
YML006C	Gis4	S(165);S(171)	AsNGKLEsNVSDDQWSNINTQTSTATR	2	-0.124358	0.0562893	-0.758328	-0.230977	0.345411	0.392863	0.581497	0.224637	-0.236886	-0.338129	0.192664	-0.104683
YML006C	Gis4	S(174)	LESNVsDDQWSNINTQTSTATR	1	0.671983	1.91037	0.0255658	-1.0371	0.157707	-1.26672	0.0471378	1.08653	-0.597318	-1.28125	-0.305075	0.588166
YML006C	Gis4	S(648)	IDKSNSNELDNsK	1	-0.107975	-0.0941914	0.802426	0.702012	0.581076	0.707492	-0.397469	-0.548208	-0.511649	-0.410719	-0.366409	-0.356386
YML006C	Gis4	S(304)	REDEsGQDEVEDHYSR	1	-0.338024	-0.202545	0.401655	0.799828	0.180533	0.512904	-0.0757322	-0.163753	0.14692	-0.43466	-0.315352	-0.511774
YML007W	Yap1	S(528)	AANMsDDESSLIK	1	-0.0636625	0.0736591	0.528446	0.290703	0.407002	0.534714	-1.04438	-0.945428	0.499544	0.306478	-0.326951	-0.260126
YML008C	Erg6	T(382)	KPENAETPSQTSQEAtQ	1	0.0456376	-0.181294	0.270126	0.53794	0.443336	0.421586	-0.410999	-0.209926	-0.210708	-0.263395	-0.137392	-0.304911
YML010W	Spt5	S(219)	EGFITHGDDEDDEAsAPGAR	1	-0.0192767	-0.379012	0.0383283	0.371985	-0.16248	0.177765	0.538113	0.434952	-0.186945	-0.0606811	-0.207739	-0.545009
YML016C	Ppz1	Y(165)	SSYSSTyYENALTDDDNDDKDNDISHTK	1	-0.353354	0.0183962	-0.153056	0.0372362	0.0880636	-0.395006	-0.243921	-0.0723224	0.125271	-0.473358	0.536997	0.885054
YML017W	Psp2	S(340)	LGsPALELQSKPDK	1	0.532257	2.09437	0.154321	-1.17652	-0.254452	-1.66514	0.057776	0.886242	-0.665745	-1.52839	0.175843	1.38944
YML018C	Yml018C	T(91)	ELIMEEEGtGSDSNR	1	-0.502717	-0.582553	-0.155163	-0.155881	-0.140135	0.0743223	0.17387	0.0777535	0.276382	0.340142	0.347764	0.246216
YML020W	Yml020W	S(78)	ETAQDNSQENDNVsNEGTR	1	-0.486089	-0.517245	-0.345218	-0.128616	-0.205092	-0.143679	0.556776	0.437431	0.231023	0.037437	0.2486	0.314672
YML027W	Yox1	S(358)	RPVSNPSGsPK	1	0.192197	-0.0821509	0.477248	1.36627	0.220066	0.658411	-0.252499	-0.735121	-0.156998	-0.584264	-0.480015	-0.623143
YML031W	Ndc1	S(401)	DNGLLDEsPNR	1	-0.303302	-0.0956571	0.277329	0.283801	0.29867	0.17755	-0.201104	-0.200858	0.0238055	-0.0178178	-0.0953983	-0.147019
YML034W	Src1	T(289);S(296)	ELGTANGtGHSTPLsK	2	-0.435575	-0.356293	-0.111905	-0.198047	-0.0872022	0.117928	0.608691	0.417768	0.0682024	0.0568132	-0.0422108	-0.0381698
YML034W	Src1	S(82)	MDRPSSSPsIASSR	1	-0.0611979	0.00136075	-0.17404	0.585624	0.071739	0.0221456	0.236509	-0.0895368	-0.122002	-0.656173	0.0489908	0.136579
YML035C	Amd1	S(58)	IGDEQAGVVVDDETPPLEQQDsHESLAADSR	1	0.131588	0.0313601	-1.28792	-0.941008	-0.0812963	0.38842	0.4553	0.324109	0.445567	0.547454	0.336764	-0.350335
YML035C	Amd1	S(58);S(61)	IGDEQAGVVVDDETPPLEQQDsHEsLAADSR	2	-0.421088	-0.482391	-0.385749	-0.20366	-0.33818	-0.107136	0.706134	0.24052	0.124344	0.488781	0.314537	0.0638853
YML035C	Amd1	S(19)	LNDLSLEPAPsHDEQDGSGLVIDIDQR	1	0.682121	0.0339801	-1.2294	-0.460939	-0.581774	-0.862186	1.06292	0.929401	0.0301882	0.263567	0.0359519	0.0961767
YML052W	Sur7	S(293)	sHERPDDVSV	1	0.380361	0.414166	0.279625	0.397999	0.0182023	0.280212	-0.459646	-0.324868	0.694456	0.424597	-0.912998	-1.19211
YML052W	Sur7	S(301)	KSHERPDDVsV	1	0.0263126	-0.052136	0.445294	0.510932	0.277042	0.267025	-0.148757	-0.0457573	-0.291221	-0.141445	-0.308671	-0.538619
YML057W	Cmp2	S(35)	TERPQSSTTPIDsK	1	0.0367923	0.535287	-0.320136	-0.548925	-0.343128	-0.115072	1.40091	1.44746	0.0172623	0.337067	-0.791704	-1.65581
YML059C	Nte1	S(300);S(302)	sCsSNLIDEEDESVGYIHLK	2	-0.190789	0.184865	0.283881	0.0859061	0.0778606	-0.129256	-0.341937	0.045914	0.207149	-0.201441	-0.036165	0.0140129
YML061C	Pif1	S(170)	ESsFDELQNNSISQER	1	-0.0409085	0.268385	0.28585	0.380714	0.355141	-0.15334	0.199969	0.578794	-0.472304	-0.799992	-0.327748	-0.27456
YML062C	Mft1	S(368)	QGNNEETDKETGVIEEPDAVNDAEEADsDHSSR	1	-0.00364686	0.185592	-0.0371814	0.232501	0.42004	0.576136	-0.383372	-0.533233	0.030824	-0.135976	-0.0266636	-0.325019
YML063W	Rps1B	S(245)	KVsGFKDEVLETV	1	-0.211369	-0.134595	-0.130455	-0.765353	-0.478702	-0.13315	0.932712	1.21976	-0.0111333	0.140158	-0.101053	-0.326823
YML065W	Orc1	S(237)	ATQTAQIsDAETR	1	-0.146841	-0.0672451	0.138938	0.328001	0.155341	0.0685346	-0.0838236	-0.0966386	-0.0373837	-0.308315	-0.0262309	0.0756632
YML069W	Pob3	S(195)	KEESsNEVVPK	1	-0.437653	-1.07264	-0.609796	0.14094	-0.667621	-0.302674	0.944226	0.63096	0.707638	0.868186	0.0632064	-0.264774
YML070W	Dak1	T(376)	TSAPSVNDDLLHNEVtAK	1	-0.0349478	0.409106	-0.0329706	-0.0863736	-0.225141	-0.296053	-0.0140016	-0.143521	-0.0306849	-0.0603383	0.337746	0.177179
YML072C	Tcb3	T(1350)	RSPSNLNSTSVtPR	1	0.147788	0.567941	0.250667	0.0447419	0.0475935	-0.375906	-0.0268345	0.401487	-0.347709	-0.897514	-0.0715051	0.25925
YML074C	Fpr3	S(80);S(81)	RNPDFEDDDFLGGDFDEDEIDEEssEEEEEEK	2	-0.304013	-0.0152338	0.299553	-0.273725	0.143993	0.378306	-0.238887	0.0553748	0.406471	0.239888	-0.307116	-0.38461
YML081W	Tda9	S(180)	LDLsPSYR	1	-0.0444233	-0.267077	0.424426	0.358036	0.249424	0.519746	-0.502904	-0.487283	-0.109647	-0.205364	-0.0168768	0.081941
YML093W	Utp14	S(488)	MLDRNsDDEEDGR	1	-0.645543	-0.419857	0.546649	0.525852	0.373886	0.554766	-0.178505	-0.180241	0.267874	-0.00801193	-0.364362	-0.472509
YML093W	Utp14	S(34);S(35)	EINGEFDNssDNDKR	2	-0.282796	-0.560594	-0.201978	-0.288837	0.157756	0.379323	0.183218	0.138734	0.110426	0.476557	0.0333746	-0.145183
YML093W	Utp14	S(151)	TAQSNGNDDEDAsPQLK	1	-0.492845	-0.721392	-0.442918	-0.549642	-0.136521	-0.0426687	0.202644	-0.00159129	0.730353	1.06529	0.139288	0.249999
YML093W	Utp14	S(562)	AVENGDDIKLFEsDEEETNGENIQINK	1	-0.284062	9.68108e-05	0.293256	-0.217807	0.193429	-0.0462485	-0.180016	0.257105	0.125329	-0.0101224	-0.147936	0.0169755
YML093W	Utp14	S(423);S(424)	ELAAVssDEDNEDHDIAR	2	-0.156484	-0.468409	-0.130087	0.444418	0.135472	0.20831	-0.0755417	-0.0951491	0.0828341	0.0875574	0.143807	-0.176727
YML093W	Utp14	S(424)	ELAAVSsDEDNEDHDIAR	1	-0.110776	-0.0105226	0.481858	0.427702	0.18777	0.550751	-0.175539	-0.146663	-0.121977	-0.162287	-0.261336	-0.658981
YML093W	Utp14	S(512)	VQTLSDVENEEKENIDsEALK	1	-0.596588	-0.50996	0.344651	-0.28881	0.412165	0.12628	-0.151545	0.680971	0.0288732	-0.062173	-0.0375562	0.0536915
YML098W	Taf13	T(131)	YREEDEEGDEMEEDEDEQQVtDDDEEAAGR	1	-0.0411172	0.0908489	0.398824	0.394621	0.410689	0.522723	-0.46991	-0.658828	-0.298545	-0.286021	5.87362e-05	-0.0633438
YML100W	Tsl1	S(135)	FFsPSSNIPTDR	1	0.0263646	-0.0627475	-0.673659	-0.576425	-0.765793	-0.283585	2.14556	1.77473	-0.173708	-0.00624983	-0.558761	-0.845723
YML100W	Tsl1	S(147)	IAsPIQHEHDSGSR	1	0.284244	-0.182281	-0.218776	0.390698	-0.274135	0.00967573	0.541315	0.54819	0.0351592	-0.0318554	-0.367807	-0.734427
YML100W	Tsl1	T(171)	IASPIQQQQQDPtANLLK	1	0.231236	0.435208	-0.370245	-0.970647	-0.544468	-0.64663	0.580516	1.64211	0.189075	0.0634806	-0.0861142	-0.523518
YML100W	Tsl1	S(73);S(77)	sATRsPSAFNR	2	0.687809	0.558652	-0.219944	0.106278	-0.299876	-0.426575	0.324042	0.802621	0.66728	0.196246	-1.15931	-1.23722
YML100W	Tsl1	S(77)	SATRsPSAFNR	1	0.998583	1.14421	-0.382446	0.135307	-0.757521	-0.167009	0.253151	0.118361	0.238644	-0.949393	-0.350411	-0.281477
YML100W	Tsl1	S(216)	AGNRPTsAATSLVNR	1	-0.600514	-0.682879	-0.0623614	-0.0721024	-0.52925	-0.0853224	1.66541	1.76859	-0.188944	-0.498748	-0.284341	-0.429543
YML100W	Tsl1	S(147);S(155)	IAsPIQHEHDsGSR	2	-0.444576	-0.391549	-0.110533	0.769593	-0.314919	0.0828235	1.33851	0.163043	0.000566983	-0.104008	-0.469052	-0.519902
YML101C	Cue4	S(48)	TVQDAKPAPSVATNDPsPEPVPSAPEER	1	2.4637	1.91278	-0.524735	-0.221385	-0.612126	-1.06951	0.478497	0.0594815	-1.00189	0.0316163	-0.803445	-0.712988
YML111W	Bul2	S(68)	SAsTTNLDR	1	-0.310221	-0.476577	-0.167091	0.342363	-0.0485323	-0.0671599	0.55831	0.114816	-0.252362	-0.0945141	0.219895	0.181072
YML119W	Yml119W	S(2)	sPSPSVSPR	1	0.0606385	0.0968515	0.370909	1.00202	0.294731	0.425618	-0.00882635	-0.482367	-0.356342	-0.477192	-0.36111	-0.564933
YML123C	Pho84	T(302);S(303)	IHDtsDEDMAINGLER	2	0.855075	1.26656	-0.00177674	-0.311646	0.33933	-0.376975	-0.815595	-0.628725	-0.622929	-0.23155	0.245897	0.282331
YML123C	Pho84	T(317);S(321)	AStAVEsLDNHPPK	2	0.242652	0.0790641	0.715664	0.634538	0.711862	0.700529	-1.08959	-1.0281	-0.921071	-0.41857	0.340482	0.0325374
YML123C	Pho84	S(316);T(317);S(321)	AstAVEsLDNHPPK	3	-0.231287	-0.475189	0.706831	1.31096	0.595109	1.36985	-0.624993	-1.38371	-0.433465	-0.505773	-0.0121945	-0.316142
YMR004W	Mvp1	S(162)	HLIALPSTsPSEER	1	0.0848341	0.0717737	0.0482304	0.165839	-0.182503	0.245955	-0.541837	-0.424305	0.258688	0.000315989	0.332587	-0.0595794
YMR005W	Taf4	S(80)	NVsPTTNLR	1	-0.141894	0.168292	-0.097959	0.144026	-0.199737	0.102588	0.505873	-0.273507	0.342721	0.110972	-0.409004	-0.252371
YMR011W	Hxt2	S(32);T(36)	LETDEsPIQtK	2	-0.299158	-0.701619	-0.179602	0.127739	1.40076	1.51189	-1.22495	-1.594	-0.243826	-0.254973	0.546772	0.910956
YMR011W	Hxt2	S(32)	LETDEsPIQTK	1	-0.523773	-1.05506	-0.792204	-0.507327	1.0226	0.630001	-0.741324	-0.79837	-0.166291	0.264047	1.20099	1.4667
YMR014W	Bud22	S(285)	ETTsDNEDLLIK	1	-1.14983	-0.808458	0.766307	0.101717	0.774669	0.889773	-0.4225	-0.105425	0.489008	0.336571	-0.457658	-0.414179
YMR014W	Bud22	S(268)	TANANQTHSNIDYDTDDGNEKNAIDsK	1	-0.166068	-0.00883263	-0.564451	-0.331933	0.240623	-0.35397	0.33195	0.242303	-0.25777	-0.252218	0.415715	0.70465
YMR016C	Sok2	S(244)	SGPPSDSSSGSMSPNsNR	1	-0.109881	0.0190965	0.353957	0.905846	0.434911	0.783274	-1.03682	-1.38298	0.223616	-0.323253	0.13422	-0.00198391
YMR016C	Sok2	T(771)	SQVDGAGDVSNEEIAADDtK	1	0.0264065	-0.185426	0.426866	0.165206	0.332487	0.577917	-0.387822	-0.316859	-0.277923	-0.138284	-0.120013	-0.102554
YMR031C	Eis1	S(19);S(23)	DIHNIGKTsGGGsR	2	1.2063	0.661524	-0.673713	0.139211	-0.57143	-0.211734	0.754333	0.289066	-0.208629	0.100109	-0.506858	-0.978176
YMR031C	Eis1	S(762)	EATETsSAVQTK	1	-0.583645	-1.00243	-1.0211	-0.359059	-1.02232	-0.417422	1.63394	1.4122	1.67329	1.5945	-0.680165	-1.22779
YMR031C	Eis1	T(767)	EATETSSAVQtKEPEEK	1	0.212555	-0.453786	-1.04623	-0.76294	-1.19917	-0.331021	1.90681	1.37536	0.777783	1.23749	-0.651751	-1.0651
YMR031C	Eis1	S(791)	EDANDCKsAEHSK	1	0.596829	0.585171	0.240274	0.13674	-0.494165	-0.0836547	-0.129499	-0.00939154	0.823901	0.840768	-1.03734	-1.46963
YMR031C	Eis1	S(775)	EPEEKIsIGNK	1	0.406318	-0.0929228	-0.699786	-0.425282	-0.552935	-0.398461	0.859532	0.859425	0.40883	0.864833	-0.421959	-0.807592
YMR031C	Eis1	Y(586)	KISGyGNDLDAQK	1	0.184494	0.10241	0.165161	-0.198432	-0.585811	-0.162953	0.682667	0.863522	0.680914	0.788652	-1.12742	-1.3932
YMR031C	Eis1	S(157)	SKESPGAAAsK	1	1.00102	0.848584	0.434744	1.07242	-0.276544	0.232387	-0.191443	-0.60469	0.00119026	-0.430933	-0.96897	-1.11777
YMR037C	Msn2	S(452)	QRAsLPIIDDSLSYDLVNK	1	-0.263353	-0.00603219	-0.134325	-0.267171	0.332106	0.256199	-0.0132748	-0.0320238	0.0468167	-0.141437	0.0320305	0.190465
YMR037C	Msn2	S(289)	RFsDVITNQFPSMTNSR	1	0.391361	0.444529	-0.493933	-0.10315	0.0909045	-0.426492	0.093601	0.328047	-0.453355	-0.657538	0.371421	0.414605
YMR037C	Msn2	T(293)	RFSDVItNQFPSMTNSR	1	-0.117376	0.254964	0.0653534	0.12618	-0.0716288	-0.220763	-0.012363	0.152518	-0.11825	-0.708383	0.254265	0.395484
YMR037C	Msn2	S(208)	DNRLSLPNGANsNLFIDTNPNNLNEK	1	-0.359499	0.137117	-0.685324	-0.788273	0.401069	-0.699807	-0.204969	0.574127	0.366651	-0.0489509	0.482072	0.825787
YMR039C	Sub1	S(119)	LLsDDEYEDDNNNDSTNNDKDNNGK	1	-0.0365085	0.0068405	-0.14139	-0.404697	-0.0168765	-0.127307	-0.298012	-0.246551	0.173495	0.219469	0.319293	0.552246
YMR043W	Mcm1	S(144)	QQPQQQQPQQQQQVLNAHANsLGHLNQDQVPAGALK	1	-0.867576	-0.309815	-0.639604	-0.336407	-0.282651	-0.195964	1.00182	0.927299	0.383585	-0.625377	0.404422	0.540264
YMR044W	Ioc4	S(84)	DREQSEEEDIEDFGEsEANPEK	1	0.03169	0.0334221	0.323231	-0.00776299	0.179602	0.0405661	-0.201272	0.0706698	0.0742793	0.0900046	-0.40753	-0.2269
YMR044W	Ioc4	S(241)	QQAIDAsEEEEEEEEEK	1	-0.0954158	-0.152909	0.242113	0.0261614	0.0745647	0.384386	-0.003103	-0.139791	-0.0183629	0.192033	-0.199796	-0.309879
YMR049C	Erb1	S(20);S(23)	AAsEEsDVEEDEDK	2	-0.720559	-0.952302	0.301059	0.181139	0.178703	0.503285	-0.369794	-0.262501	0.872287	0.811387	-0.261696	-0.281007
YMR054W	Stv1	S(223)	NQsVEDLSFLEQGYQHR	1	-0.0334048	0.590378	0.290118	0.18398	0.357632	-0.486613	-0.229755	0.00791269	-0.275976	-0.733717	-0.108614	0.438058
YMR058W	Fet3	T(623)	EVNEDRHStEK	1	-0.707886	-0.353721	2.10261	2.22535	1.62311	1.96808	-1.08306	-1.45833	-0.171332	-0.36465	-1.76344	-2.01673
YMR081C	Isf1	S(259)	ERTPsNLR	1	-0.720461	-0.802515	-0.12703	-0.218276	0.110918	-0.122826	-0.327628	-0.304629	0.583436	0.851539	0.480765	0.596707
YMR081C	Isf1	Y(285);S(288)	NNSySNsLVK	2	-1.21611	-1.41048	-0.844095	-0.1689	-0.66878	-0.649472	0.245496	-0.212754	1.50356	1.55933	0.979937	0.882273
YMR081C	Isf1	Y(285)	NNSySNSLVK	1	-1.43557	-1.07867	-0.29225	-0.855645	-0.449317	-0.274837	0.118682	0.12105	1.54775	1.32767	0.510708	0.760426
YMR081C	Isf1	S(142)	QSSLGDAADsCFDHK	1	-0.651634	-0.611159	-0.263677	-0.206017	-0.494843	-0.301492	-0.207732	-0.117158	1.26373	1.08494	0.354152	0.150885
YMR081C	Isf1	S(265)	REsFSLLSNGSSSSPLQTR	1	0.16026	0.0122989	-0.070186	-0.130815	-0.232706	-0.147843	0.319545	0.247578	-0.270944	-0.273372	0.0940306	0.292154
YMR081C	Isf1	S(119);S(127)	ANsSTLIHQLsR	2	-0.405512	-0.644173	-0.176781	0.367289	0.000671049	-0.0964198	-0.294077	-0.213128	0.451211	0.10655	0.424489	0.479882
YMR081C	Isf1	S(111)	TAPHHLYGFVPANSTNNSNEPIRPsPR	1	0.0250737	-0.0573519	-0.142184	0.5901	-0.0733874	0.0670959	0.297492	-0.108947	-0.0915573	-0.185095	-0.0154373	-0.305802
YMR086W	Seg1	S(48)	SAsMTNLR	1	-0.104112	-0.404877	-0.253856	-0.147798	-0.251093	-0.202317	0.654413	0.626976	0.262321	0.509495	-0.307673	-0.381478
YMR086W	Seg1	S(217);S(220)	SNsAHsALNAR	2	-0.312875	-0.423597	-0.0208288	0.84254	0.178147	0.376671	0.374791	-0.0488794	0.0291818	0.00658118	-0.248416	-0.753315
YMR086W	Seg1	S(235);S(238)	KKVsQEsLHSQPK	2	-0.353606	-0.453213	-0.486647	-0.400059	-0.12867	0.362846	0.373284	-0.024545	0.666223	0.793277	-0.0705844	-0.278306
YMR086W	Seg1	S(118)	TSsLPNQR	1	0.353122	0.11221	-0.0632534	0.0727795	-0.567835	-0.240793	0.543974	0.327692	0.643541	0.711985	-0.909548	-0.983874
YMR086W	Seg1	S(360)	EKPLNSDQEDVFIsEK	1	1.25881	1.5867	-0.21054	-0.855496	0.0678927	-0.577547	0.467836	0.957752	-1.22767	-1.27565	-0.356328	0.164241
YMR086W	Seg1	S(247)	KTsSLGNTSSTQAK	1	0.366967	0.344677	-0.213859	0.0492337	-0.353387	-0.079625	0.752493	0.694013	-0.0629504	-0.468815	-0.489264	-0.539483
YMR086W	Seg1	S(63)	MSsISSISSESR	1	0.202336	0.410951	0.103242	0.352923	0.0696197	-0.370761	0.0572888	0.308165	0.166435	-0.387576	-0.598922	-0.313702
YMR086W	Seg1	S(645)	RPQsVGQFR	1	-0.2571	-0.505325	-0.14999	0.122551	0.0574035	-0.20045	0.19968	0.311422	0.167711	0.208609	-0.0177047	0.0631925
YMR091C	Npl6	S(86)	HVDEEEDLsEDKGVTR	1	-0.355562	-0.442937	-0.0527191	-0.0246187	-0.0887604	0.330959	0.189956	0.255847	0.204429	0.119937	0.102656	-0.239187
YMR091C	Npl6	T(92)	HVDEEEDLSEDKGVtR	1	-0.0336092	-0.235656	-0.17835	0.0599154	-0.0809853	0.0458273	0.0961528	-0.0264799	0.222756	0.252834	-0.0259646	-0.0964413
YMR102C	Ymr102C	T(429)	HGPRVtGLQAFR	1	-0.187696	-0.427981	0.206812	1.44785	0.19673	0.632864	0.165849	-0.367288	-0.0191514	-0.590119	-0.362543	-0.69533
YMR104C	Ypk2	S(20);S(21)	SKEDDGssEDENEK	2	-0.0464648	0.215797	0.0720359	0.0768582	0.28667	0.603275	-0.596605	-0.413451	0.414214	0.130042	-0.129851	-0.612522
YMR109W	Myo5	S(1205)	MRLEsDDEEANEDEEEDDW	1	0.108368	0.255065	0.268683	-0.209528	0.182961	0.183258	-0.402449	-0.270543	-0.10828	0.16989	-0.0492835	-0.128142
YMR109W	Myo5	S(357)	GsVYHVPLNIVQADAVR	1	0.255222	0.434123	-0.117845	-0.207432	0.0606464	-0.725228	-0.169683	1.03749	-0.261591	-1.08886	0.233251	0.549904
YMR109W	Myo5	Y(359)	RGSVyHVPLNIVQADAVR	1	0.51768	0.774697	0.235218	0.0890938	0.549097	-0.214153	-0.372655	0.230103	-0.667663	-1.08464	-0.261676	0.204899
YMR109W	Myo5	S(777)	RSMsLLGYR	1	-0.134547	-0.00885813	0.0654614	0.0551963	0.0781241	-0.116937	-0.109482	-0.053627	0.0353399	-0.133976	0.0651035	0.258202
YMR109W	Myo5	T(1048)	SVPNPASTLTASQSNARPSPPtAATR	1	0.0741546	0.77075	0.0256684	-0.378591	-0.208232	-0.185538	-0.100189	0.384027	0.11517	-0.61668	0.0934286	0.026033
YMR111C	Ymr111C	S(237);S(249)	IKPEPGLsDFENGEYDGNEsDENATTR	2	-0.0563826	-0.168578	0.0807648	-0.24261	-0.332742	0.0854458	-0.277332	-0.474598	0.112446	0.161684	0.473245	0.638656
YMR111C	Ymr111C	S(249)	IKPEPGLSDFENGEYDGNEsDENATTR	1	0.074082	0.334014	0.482398	0.383492	0.381663	0.461871	-0.555103	-0.639865	-0.0600312	-0.166578	-0.323009	-0.372934
YMR114C	Ymr114C	S(338)	EEANLsPK	1	-0.0763398	-0.229247	0.295167	0.0619564	-0.0680601	0.034251	-0.43437	-0.323542	0.372489	0.615541	-0.0888855	-0.158959
YMR124W	Epo1	S(653)	RASLLQsIPERDPK	1	-0.664429	-0.309344	-0.284382	0.271735	0.320375	-0.123558	-0.445425	-0.411612	0.539349	-0.0450893	0.534512	0.617868
YMR139W	Rim11	S(198)	QLKPTEPNVsYICSR	1	0.341876	1.04255	0.108836	0.0462958	-0.250729	-0.530877	-0.20045	0.193649	0.102729	-1.10995	-0.102263	0.358331
YMR140W	Sip5	S(470)	EAIRLsLEDQDNR	1	0.0898238	0.158911	-0.0755707	-0.134283	-0.240764	-0.180209	-0.187817	-0.303498	0.404304	0.464579	0.0100246	-0.00549985
YMR148W	Osw5	S(102)	MALQTQPAQLQEPQEPLSTLRPVSNPTIPsPLR	1	0.0498885	0.782125	0.358358	-0.224425	-0.0470085	-0.365081	-0.432892	0.374069	0.290965	-0.438435	-0.219311	-0.128254
YMR153W	Nup53	S(101)	SNGQSLsPVR	1	-0.375131	-0.261925	0.422785	0.421731	0.243023	0.553339	-0.339086	-0.563341	0.255044	-0.00122631	-0.206635	-0.148579
YMR155W	Ymr155W	S(237)	ETDDNIVPLYENSNDYIGsPVR	1	0.363491	0.883661	0.231957	0.115205	-0.0125333	-0.29848	-0.160918	-0.218082	-0.143703	-0.349616	-0.278293	-0.132689
YMR162C	Dnf3	S(658)	sRNSIEYK	1	0.145935	0.352816	0.270982	0.151181	-0.0928907	0.0635703	-0.568376	-0.816293	0.574772	0.552583	-0.330422	-0.303856
YMR165C	Pah1	S(602)	TNTSMVPGsPPNR	1	0.00890423	0.260321	0.100934	0.25255	0.217716	0.0992692	-0.414629	-0.641831	-0.0939104	-0.133301	0.180985	0.162991
YMR196W	Ymr196W	S(1088)	AKDEDIDPMDPMSPLNKDVs	1	0.836356	0.426692	-0.601314	-0.324399	-0.632605	-0.456619	0.268543	0.0381276	-0.414154	-0.00599666	0.543174	0.322195
YMR205C	Pfk2	S(167);S(171)	SGLSsEVHsYTDLAYR	2	-0.861484	-0.991258	-0.924109	-0.10186	-0.661966	-1.32869	0.80898	1.09074	0.139763	-0.12534	1.49882	1.45641
YMR205C	Pfk2	S(163);S(167)	sGLSsEVHSYTDLAYR	2	-0.376926	0.136323	0.175046	-0.521296	-0.301686	-0.841431	-0.4184	0.372547	0.0275754	-0.499819	0.894391	1.35368
YMR205C	Pfk2	S(163)	sGLSSEVHSYTDLAYR	1	-0.120923	-0.0405223	-0.650563	-0.515525	-0.0567634	-0.39613	0.200814	0.770769	-0.245353	-0.566999	0.872788	0.748408
YMR205C	Pfk2	Y(172)	SGLSSEVHSyTDLAYR	1	-0.463844	-0.201343	-0.235219	-0.0426582	0.114547	-0.341618	0.082084	0.28861	-0.0279898	-0.369994	0.530422	0.667003
YMR205C	Pfk2	S(163);S(171)	sGLSSEVHsYTDLAYR	2	-0.524627	-0.388864	-0.731292	-0.380478	-0.478073	-0.565658	0.349973	0.7934	0.308998	-0.0993392	1.07502	0.640939
YMR205C	Pfk2	S(171)	SGLSSEVHsYTDLAYR	1	-0.2692	-0.289769	-0.364049	0.146719	-0.000237385	-0.326807	0.159481	0.620189	-0.137868	-0.4465	0.611874	0.296167
YMR206W	Ymr206W	S(298)	RNsIAVK	1	-0.650338	-0.775014	-0.502911	-0.284365	-0.844679	-0.63098	0.296418	0.253516	1.78071	1.66039	-0.0791969	-0.223545
YMR212C	Efr3	S(564)	DNQIsTSDLLSDSQVR	1	-0.670711	-0.698668	-0.789804	-0.71148	-0.440273	-0.739929	0.885699	1.05049	0.158594	-0.0434116	0.856495	1.143
YMR212C	Efr3	S(771)	TATGENQNDDFKDANEDLHsLSSR	1	-0.513833	-0.910162	-0.565217	0.645596	-0.213899	-0.499011	0.206221	-0.0182802	0.156575	0.141275	0.930153	0.640583
YMR219W	Esc1	T(787)	QVSDLDESTENVtFENENTDDENKNQSK	1	-0.121748	-0.232307	-0.965492	-0.332525	-0.774799	-0.33327	0.319659	0.030881	0.969354	0.726636	0.573026	0.140584
YMR219W	Esc1	S(1591)	SVLEEQKPSMELINDKGsPENNNDEETNR	1	-0.865914	-0.827493	-0.356443	-0.866087	-0.802367	-0.4157	0.520868	0.61917	1.12913	1.28271	0.374729	0.2074
YMR219W	Esc1	S(911);S(918)	VRDsDLEDDEsLKK	2	-0.688579	-1.07939	-0.486195	-0.504781	-0.407309	-0.284582	0.373776	0.673437	0.87367	1.16882	0.334637	0.0264939
YMR219W	Esc1	S(865);S(866)	DMNEAEMssGDER	2	-0.0686326	-0.276289	0.179789	0.316197	-0.06544	0.0483525	-0.354061	-0.206652	0.326507	0.271386	-0.018163	-0.152994
YMR219W	Esc1	S(1326)	NLsDLENYSQR	1	-0.259681	0.236752	0.236282	0.418659	0.464609	-0.0112046	-0.691384	-0.814534	0.132599	-0.0156665	0.117575	0.185994
YMR219W	Esc1	S(1354)	NQEESDEVNTsR	1	-0.0677069	0.198479	0.475199	1.06992	0.247433	0.647913	-0.292681	-0.968792	0.140057	-0.320103	-0.502301	-0.627419
YMR219W	Esc1	S(918)	VRDSDLEDDEsLKK	1	-0.0460101	-0.491664	-0.124101	-0.192926	-0.0799414	0.0977458	-0.559554	-0.466923	0.34206	0.626145	0.467547	0.427622
YMR221C	Fmp42	S(238)	LIEGDTGsGIIPDEQER	1	-0.379946	-0.623768	-0.487342	0.0365278	0.114959	-0.00183623	0.442582	0.398238	0.147263	0.425631	0.162483	-0.234792
YMR221C	Fmp42	S(269)	RKsVLETYVEDK	1	-1.00724	-1.23688	-0.700854	-0.787288	0.14499	0.00787733	0.67593	0.871799	0.67852	0.853008	0.208653	0.29148
YMR221C	Fmp42	S(238);S(249)	LIEGDTGsGIIPDEQERQsLIAIER	2	-0.610556	-0.295321	-0.367021	-1.1786	-0.170633	-0.107921	0.497459	0.40281	0.400913	0.907403	0.249838	0.271629
YMR229C	Rrp5	S(188)	VEDAEYESsDDEDEKLDK	1	-0.357197	-0.12076	0.685811	0.482608	0.565656	0.967119	-0.0948927	0.0356633	-0.173692	-0.209435	-0.625685	-1.1552
YMR229C	Rrp5	S(178);S(198)	sKVEDAEYESSDDEDEKLDKsNELPNLR	2	1.04909	0.501416	-1.1662	-0.807391	-0.107375	-0.157409	0.568298	0.061961	-1.2284	-0.278458	0.884587	0.679881
YMR230W	Rps10B	S(98)	NPsQRPQR	1	-0.121011	-0.896731	-0.821557	-0.983625	-0.458541	-0.517974	0.987747	1.09997	0.20565	1.09595	0.207713	0.202414
YMR237W	Bch1	S(516)	IFVMEDEYQGSTSsIDEAEVR	1	0.021803	0.382874	0.317066	0.16991	0.439772	0.00167441	-0.516038	-0.379267	-0.193265	-0.113355	-0.0693389	-0.0618353
YMR253C	Ymr253C	S(36);S(38)	sLsPKESNSNEDFNVDGNETTLQR	2	-0.361599	-0.741419	-0.368692	-0.12426	-0.657634	-0.373205	0.836809	0.834438	0.351624	0.87946	0.199491	-0.475014
YMR255W	Gfd1	T(103)	AtEISPPPVSPSK	1	-0.263379	-0.328011	0.505778	0.681803	0.696258	0.797886	-0.393776	-0.456378	-0.463984	-0.347496	-0.0808976	-0.347802
YMR260C	Tif11	S(19)	GKNDsDGPKR	1	-0.587819	-0.326646	-0.1373	0.202836	-0.00683491	0.000967842	0.361247	0.776277	0.415281	-0.583058	-0.0445742	-0.0703764
YMR261C	Tps3	S(148)	VCsPSQEASASSISASR	1	1.02887	1.13766	-0.581976	-0.587229	-1.06626	-0.277263	1.96177	1.90547	-0.624294	-1.34197	-0.718111	-0.836669
YMR261C	Tps3	S(181)	NPNLsFDSHPPR	1	-0.482145	-0.295969	-0.0209982	0.340684	-0.152708	-0.101664	0.491465	-0.159975	0.285736	0.0870204	-0.12135	0.129904
YMR261C	Tps3	Y(253);S(254)	ysQQFQDNFIEDTDSEDDIDSDLETDATKK	2	0.921509	1.11013	0.592644	0.0662564	-0.207414	-0.288636	-0.250915	-0.0584755	-0.159016	-0.0201698	-0.896808	-0.809101
YMR266W	Rsn1	S(949)	YKEEEsR	1	-0.732231	-1.20963	-0.127936	0.0326379	-0.204633	-0.122042	1.08072	1.17465	0.179216	0.70412	-0.195139	-0.579739
YMR273C	Zds1	S(445)	QSsGEWEQEMGIEK	1	0.191132	0.212526	0.467161	0.283804	0.0952392	0.100611	-0.542359	-0.431161	-0.0745946	-0.0631881	-0.136579	-0.102592
YMR275C	Bul1	S(195)	SSsTSNLENLIPLR	1	-0.122322	0.194079	0.139914	0.00320299	0.301535	0.217614	-0.560131	-0.660838	0.016572	-0.204346	0.224433	0.450289
YMR291W	Tda1	T(504);S(507)	NSLMNGCFSTtPEsR	2	-0.394469	-1.03085	-0.935373	-0.400414	-0.827054	-0.433489	0.952763	0.767167	1.20756	1.17602	-0.00342411	-0.0784355
YMR291W	Tda1	T(541)	tASMSSNDTTAINDNDTTNDKNPAR	1	-0.778477	-1.12238	-0.292039	-0.432579	-0.744578	0.0571501	0.511181	0.217242	1.22747	1.11234	0.0764482	0.168225
YMR291W	Tda1	T(538)	YVNEVDLLLtPR	1	-0.34136	-0.109003	-0.357499	-0.683324	-0.402876	-0.655802	0.355701	0.648546	0.583733	0.555977	0.162301	0.243607
YMR295C	Ymr295C	Y(72)	QSyFSNEEGHVLCDVFGQPITQADISNPTR	1	0.828829	1.45981	-0.169497	-0.281427	0.806491	-0.496565	-0.687049	-0.765685	-0.740349	-0.424084	-0.0384247	0.507951
YMR295C	Ymr295C	S(14)	SSISNTsDHDGANR	1	0.412718	0.435238	0.808115	1.44424	0.603264	1.29633	-0.73456	-1.50541	-0.589414	-1.01756	-0.500123	-0.652843
YMR311C	Glc8	S(158)	KPCQVANDDIDDLsLGEPEFEIK	1	-0.766215	-0.939612	-0.295662	-0.728365	-0.348934	-0.167272	0.604507	1.01367	0.660108	1.00818	0.146197	-0.186602
YMR311C	Glc8	T(118)	QFQDIHIDEPKtPYQGAVDPHGEYYR	1	-0.372666	-0.894359	-0.71455	-0.443713	-0.42061	-0.515772	0.484483	0.563612	0.611328	0.866509	0.412015	0.423723
YMR311C	Glc8	S(142);S(158)	VDDDEDEDNsDKKPCQVANDDIDDLsLGEPEFEIK	2	-0.435055	-0.771065	-0.360027	-0.493915	-0.529006	-0.153495	0.147104	0.689281	0.592045	0.598379	0.58494	0.130815
YMR311C	Glc8	S(184)	ENKQPDFETNDENDEDsPEAR	1	0.434797	0.171412	-0.331592	-0.253266	-0.552073	-0.334854	0.484445	0.196369	0.0441316	0.352406	-0.0797089	-0.132067
YMR311C	Glc8	S(12)	NPLALsPEQLAQQDPETLEEFR	1	0.604731	0.470989	-0.412215	-0.32377	-0.152931	-0.51399	-0.0361418	-0.060835	-0.112267	0.276335	0.108823	0.15127
YMR318C	Adh6	T(350)	FtLVGYDKEFSD	1	0.343465	0.483284	0.2326	0.020408	0.660696	0.22534	-0.439141	-0.405717	-0.731672	-0.596457	-0.0659475	0.273143
YNL004W	Hrb1	S(343)	ESVHNHsDGDDVDIPMDDSPVNEEAR	1	-0.31158	-0.161533	0.277459	0.424717	0.0519208	0.229855	-0.184254	0.0233658	-0.109789	-0.289966	0.276244	-0.22644
YNL004W	Hrb1	S(27)	MsDDHGYER	1	-0.508609	-0.276978	0.462292	0.60169	0.333691	0.521746	-0.499879	-0.778921	0.303866	-0.0298928	-0.091361	-0.0376446
YNL015W	Pbi2	T(74)	EKHNDVIENVEEDKEVHtN	1	-0.0556414	-0.325395	-0.408877	-0.163468	-0.566031	-0.0479013	1.57015	1.40507	-0.142314	-0.117565	-0.397288	-0.750741
YNL027W	Crz1	T(409);S(410);S(413)	RSSQtsNNsFTSR	3	-0.864369	-0.934813	0.0596953	0.291261	0.502989	0.555284	-0.157786	-0.262031	0.411467	0.313757	0.048003	0.0365422
YNL027W	Crz1	S(382)	NLLRPDDNDYNNEALsDIDR	1	-0.700294	-0.591541	-0.421993	-0.354728	0.0856731	0.220027	-0.388894	-0.408559	0.673367	0.576675	0.752141	0.558125
YNL027W	Crz1	S(407)	RSsQTSNNSFTSR	1	-0.465767	-0.439593	0.45333	0.660137	0.462119	0.7315	-0.120462	-0.164961	-0.0997896	-0.285243	-0.229431	-0.50184
YNL035C	Ynl035C	S(351)	MNVLGDDDREGsINLDEPLIIQK	1	0.486852	0.579393	-0.544583	-0.808636	-0.562132	-0.838777	0.848037	0.864621	-0.194481	-0.0589411	-0.0336936	0.26234
YNL039W	Bdp1	T(180)	LGSItENDMNLK	1	-0.853028	-1.06914	-0.535201	-0.72236	0.324807	0.201595	0.130793	0.341781	0.737861	1.0262	0.194768	0.221925
YNL039W	Bdp1	S(586)	ERNNDDNEDNEGsEEEPEIDQ	1	-0.641266	0.145916	0.850619	0.787826	-0.033803	0.246568	0.675742	-0.117923	-0.42286	-0.216424	-0.428432	-0.845963
YNL049C	Sfb2	S(417)	sEQGILNTPK	1	-0.822537	-1.53639	0.69447	0.602456	-0.0653313	1.4067	-0.854597	-1.15564	0.887814	1.31087	0.160181	-0.628001
YNL049C	Sfb2	S(51)	ANsFTQLAQNQQFPGSGK	1	-0.374838	0.366823	-0.451898	-1.21145	0.183816	-0.475115	0.710238	1.13897	-0.570789	-0.77698	0.503471	0.957744
YNL059C	Arp5	S(7);T(9)	DAsLtPLK	2	-0.283567	-0.472951	-0.217936	-0.0349861	-0.37367	0.0686661	0.0919233	0.394134	0.651732	0.604917	0.131519	-0.55978
YNL061W	Nop2	S(38)	GKRPsTTQGDEVSDR	1	-0.566976	-0.546909	-0.104629	0.760775	0.16371	0.398881	0.154909	-0.455624	0.140343	0.0393058	0.212643	-0.196429
YNL068C	Fkh2	S(841);T(842)	DINSSPLKNQGGstANAK	2	0.790464	0.308546	-0.612965	0.312732	-0.0103303	0.110514	0.844609	0.608823	-0.0886835	-0.00508388	-0.923094	-1.33553
YNL069C	Rpl16B	S(187)	KVSSASAAASEsDVAK	1	-0.375811	-0.164606	-0.0449029	0.0218376	0.169022	-0.278441	0.218082	0.358813	-0.375941	-0.597341	0.40955	0.659738
YNL074C	Mlf3	S(11)	SNSNNsNPSFIFER	1	0.603443	1.03951	0.550245	0.268038	0.511182	-0.387469	-0.746084	-0.589618	-0.65233	-0.595234	-0.266456	0.264774
YNL076W	Mks1	T(566)	LDNTSIANSNGNGNDDtSNQR	1	-0.0462078	0.293908	0.315506	0.0674389	0.2913	0.0478981	-1.16432	-0.754472	0.155925	-0.274552	0.447802	0.619779
YNL076W	Mks1	T(241)	NTSPtLENMGSR	1	0.0759538	0.419141	0.594883	0.366847	0.465697	0.158894	-0.404745	-0.355197	-0.220983	-0.382005	-0.510806	-0.20768
YNL076W	Mks1	S(518)	RQsMDIPSK	1	-0.267446	-0.276368	-0.152835	0.0411603	-0.0764094	0.0496847	-0.081497	-0.170598	0.349822	0.20289	0.228365	0.153231
YNL084C	End3	S(276)	YAsLTDDQVANMR	1	-0.0891963	-0.145291	0.316497	0.308826	0.18442	0.295806	-0.175306	-0.172254	-0.119322	-0.0828893	-0.117092	-0.204198
YNL085W	Mkt1	T(377)	SNLSSPSSASSSASPATTVtK	1	0.286476	1.34229	0.955876	0.8935	0.353379	0.243486	-0.919732	-1.5995	-0.210742	-0.421945	-0.465257	-0.457826
YNL088W	Top2	T(1314)	ENtPEQDDVATKK	1	0.341412	0.738458	0.558612	0.233823	0.064188	0.144388	-0.0317997	-0.0558219	-0.153476	-0.142416	-0.778936	-0.918431
YNL098C	Ras2	S(202)	GNGANsVPR	1	-0.175283	-0.202152	0.309987	0.464262	-0.102069	0.124636	-0.142836	-0.163484	0.452391	0.307407	-0.342191	-0.530668
YNL098C	Ras2	S(202);S(207)	GNGANsVPRNsGGHR	2	-0.367961	-0.328919	0.166818	0.188516	0.177379	0.238967	-0.513875	-0.228967	0.534246	0.169001	0.00339319	-0.0385983
YNL098C	Ras2	S(214)	KMsNAANGK	1	-0.737835	-1.07067	0.0996174	-0.263258	0.0108952	-0.00709077	-0.646093	-0.129057	0.654638	0.635346	0.618777	0.834734
YNL098C	Ras2	S(235);S(238)	NAsIEsK	2	-0.991633	-0.946951	-0.246816	-0.678305	-0.757901	-0.756911	0.726441	0.503712	0.84259	0.9953	0.427318	0.883154
YNL098C	Ras2	S(225)	NVNSsTTVVNAR	1	-0.597375	-0.725804	-0.14941	0.331002	-0.46821	-0.0121639	1.15983	0.573295	0.171007	0.0741787	-0.115839	-0.240507
YNL102W	Pol1	Y(26)	NGTSIDDyEGDESDGDRIYDEIDEK	1	0.0952256	0.112444	0.466624	-0.0236876	0.359928	0.353635	-0.260481	-0.153554	-0.384745	-0.0256352	-0.276552	-0.263202
YNL103W	Met4	S(547)	sHSGDLK	1	0.134014	0.427193	0.44622	0.718255	0.453872	0.574653	-0.252275	0.0834284	-0.440847	-1.07536	-0.340984	-0.728166
YNL106C	Inp52	S(1148)	VSPSNSKsEEELPCK	1	0.111743	-0.207068	-0.516506	0.59234	-0.168687	-0.376783	0.257171	0.0795546	0.258365	0.0115058	0.0579141	-0.0995484
YNL112W	Dbp2	S(88)	DRsDSEIAQFR	1	-0.536956	-0.870318	-0.36224	0.254857	0.0559237	0.278116	0.540581	0.260026	0.363683	0.27322	-0.0609923	-0.1959
YNL115C	Ynl115C	T(248)	SQYGSGSPTPtHR	1	0.497754	0.499112	0.270486	0.544708	-0.13737	0.0707321	-0.163172	-0.694335	0.199668	0.226277	-0.667367	-0.646495
YNL115C	Ynl115C	T(246)	SQYGSGSPtPTHR	1	0.405814	0.320369	-0.140993	0.953468	0.012173	0.0985491	0.0103945	-0.616783	0.0582291	-0.0759581	-0.345617	-0.679644
YNL115C	Ynl115C	S(244)	SQYGSGsPTPTHR	1	0.249774	0.184635	0.422806	1.30891	-0.0796774	0.100998	-0.573066	-0.689941	0.421112	-0.205844	-0.44095	-0.698754
YNL118C	Dcp2	S(606);S(607)	QNssVGMQNK	2	-1.05028	-0.762851	-0.390151	0.277909	-0.628264	-0.173459	0.740126	0.685644	1.3912	0.496135	-0.0626284	-0.523378
YNL127W	Far11	S(524);S(528)	HIATPAPsPPSsPQLMHLGEGPRPR	2	0.622269	0.997182	-0.117575	0.0789838	-0.12422	-0.208551	-0.140793	-0.275505	-0.247039	-0.737685	0.00735807	0.145575
YNL127W	Far11	S(72)	NsFHADKR	1	-0.62147	-0.608979	0.499673	0.27857	0.0139185	0.353386	-0.394726	-0.440933	0.276594	0.28285	0.226012	0.135107
YNL132W	Kre33	S(1007)	YAINDNSEEWAEsQK	1	-0.403834	-0.803213	0.394084	-0.313765	0.156539	0.331276	0.252937	0.745057	-0.100931	0.380774	-0.298795	-0.340129
YNL136W	Eaf7	S(225)	EHMsEEEQK	1	0.00415373	-0.0240618	0.318254	0.472206	0.274912	0.466921	-0.418915	-0.739815	-0.101623	-0.127572	-0.0767815	-0.0476776
YNL136W	Eaf7	S(411)	KNsPPATR	1	0.117659	0.20365	0.459867	0.645035	0.21678	0.232891	-0.380662	-0.546094	-0.0179512	-0.237717	-0.395693	-0.297765
YNL149C	Pga2	S(119)	RNQGLDPDsDADIEELLEE	1	-0.0598816	0.147497	0.324333	0.108168	0.146501	0.155423	-0.300203	-0.503264	0.0291304	0.182521	-0.13988	-0.0903461
YNL151C	Rpc31	S(189)	ELAEDVDDAsTGDGAAK	1	-1.17826	-0.797249	-0.155051	0.356287	0.250167	0.192308	0.484635	0.360145	0.365993	0.171143	0.23252	-0.282635
YNL152W	Inn1	S(396);S(398)	KNsMsPTR	2	0.0676291	-0.0674082	0.314828	0.333122	0.163303	0.367944	-0.503367	-0.665004	0.0570286	0.233796	-0.0994213	-0.202449
YNL154C	Yck2	S(455)	YQLQPDDsHYDEER	1	-0.528818	-0.957687	-0.333409	-0.0860244	-0.436159	-0.0646206	0.660895	0.199768	0.42917	0.987634	0.208322	-0.0790702
YNL155W	Cuz1	S(273)	DLDTLYLVHNNADEKsN	1	-0.147588	0.513729	-0.0788379	-0.686062	0.187875	-0.84708	0.805021	1.83719	-0.344596	-0.981086	-0.421874	0.163306
YNL156C	Nsg2	S(52);T(53)	SVSIDstK	2	-0.423146	-0.453665	-0.0839563	-0.188395	-0.447854	-0.191565	0.266124	0.207135	0.869075	1.01971	-0.180242	-0.393216
YNL156C	Nsg2	S(47);S(49)	sVsIDSTKYSR	2	-0.180045	-0.605904	-0.516001	-0.570109	-0.478958	-0.229798	0.613484	0.447106	0.461056	0.898566	0.100463	0.0601392
YNL156C	Nsg2	S(12);T(13)	KstESICSLTKPQLYSLYDDDVVR	2	0.175483	1.48142	-0.798277	-1.17298	-0.202551	-0.708231	1.19032	1.56261	-0.472358	-1.39566	0.107387	0.232833
YNL161W	Cbk1	S(62);S(65)	EQGsHQsLQEHLQR	2	-0.474304	-0.516692	-0.12035	0.456573	-0.175469	0.135744	0.399709	-0.144317	0.128006	-0.0400081	0.242407	0.108701
YNL161W	Cbk1	S(62)	EQGsHQSLQEHLQR	1	-0.162006	-0.353465	0.258221	0.515849	0.285133	0.298693	-0.262133	-0.121531	-0.0343704	-0.132396	-0.0848434	-0.20715
YNL161W	Cbk1	S(65)	EQGSHQsLQEHLQR	1	-0.160908	-0.188713	0.075426	0.64048	0.106853	0.351265	-0.0483009	-0.314012	0.151846	-0.156793	-0.124917	-0.332228
YNL163C	Ria1	S(430)	IAsSDELMER	1	-0.137609	-0.0453563	-0.0804816	0.0859067	0.152973	0.380558	-0.0900174	-0.116835	0.0714275	0.0909646	0.0837076	-0.395238
YNL166C	Bni5	S(179)	GEADVETIENNDDEWEDEKsDVEEGR	1	-0.643406	-0.112986	0.495679	0.0369557	0.381923	0.170672	-0.277481	-0.132222	0.250618	0.0571735	-0.207333	-0.0195929
YNL166C	Bni5	T(257)	LADQtPHDDNSENCPNR	1	-0.31535	-0.546581	-0.0129408	1.06983	0.0787871	0.461327	0.904636	0.999617	-0.188048	-0.4681	-0.467084	-1.51609
YNL166C	Bni5	S(278)	SGGSTPLDsQTK	1	0.0593033	0.00159536	0.526811	0.217267	0.032601	0.47199	-0.105736	-0.0569948	-0.0613127	0.0197332	-0.451666	-0.653592
YNL166C	Bni5	S(270);S(273)	sGGsTPLDSQTK	2	-0.604556	-0.685372	0.198155	0.125092	-0.071654	0.246279	0.849564	0.97885	0.460073	0.510468	-0.831581	-1.17532
YNL166C	Bni5	S(198)	VDKGTEENSEIEsFK	1	-0.893398	-0.839174	-0.674251	-0.437488	-0.530927	-0.41723	1.084	0.865475	0.869485	0.833149	0.145094	-0.00473194
YNL167C	Sko1	T(385);S(386)	RMSSTSStsK	2	-0.684469	-0.497238	-0.149696	0.411293	0.230871	0.449954	-0.155975	-0.402961	0.632923	0.138259	0.126346	-0.0993063
YNL167C	Sko1	S(94);S(96)	KDsPsFLPGQQRPTIISPPILTPGGSK	2	3.12125	2.31203	-0.858707	-0.736617	-1.77757	-1.17852	0.724762	0.820105	-0.559033	-1.01997	-0.650709	-0.19703
YNL175C	Nop13	T(13)	SETELSKEDAVtK	1	-0.821629	-0.949206	-0.487543	-0.121441	0.178304	0.227244	0.292522	0.519939	0.472026	0.430423	0.36632	-0.106959
YNL183C	Npr1	S(249)	ASMDSNNANATQsR	1	-0.220779	-0.158617	-0.552541	-0.334252	-0.188925	-0.430375	-0.0138528	-0.208646	0.753494	0.881654	0.222604	0.250237
YNL183C	Npr1	S(317)	QSsIYSASR	1	-0.690365	-0.719984	-0.305045	0.467091	-0.0751013	0.0982444	0.507004	0.27272	-0.131748	-0.958439	0.695256	0.840368
YNL197C	Whi3	S(225)	RPsLLSQR	1	-0.665495	-1.13587	-0.26274	0.631917	0.428558	0.174443	-0.263582	-0.426322	0.427436	0.374268	0.335823	0.381567
YNL209W	Ssb2	T(47)	VTPSFVAFtPEER	1	0.54317	0.842484	0.313597	0.201416	0.0906677	-0.341241	-0.232209	-0.116639	-0.522436	-0.51387	-0.19279	-0.072151
YNL212W	Vid27	S(207)	DTsFEHEK	1	-0.555283	-0.547552	1.05199	0.705679	0.26646	1.13011	-0.865768	-0.681363	0.765662	0.216846	-0.66306	-0.823722
YNL212W	Vid27	T(220);S(222)	ESEILERtPsPLK	2	-0.486084	-0.166974	0.575785	0.0552888	-1.03656	-0.602718	-0.100107	0.137895	1.29141	1.04486	-0.244452	-0.468356
YNL212W	Vid27	S(214)	DTSFEHEKEsEILER	1	-0.271303	0.0354803	0.680441	0.870076	0.749369	1.3009	-0.902243	-1.0613	-0.198665	-0.744989	-0.0575992	-0.400167
YNL216W	Rap1	S(142)	DADAHDsLNDIDQLAR	1	-0.498196	-0.477571	-0.24868	0.0649284	-0.355079	0.0361834	0.797152	0.54148	0.522302	0.165217	-0.2175	-0.330238
YNL224C	Sqs1	S(345);T(349)	ADNNLLPSPsPQLtEDIK	2	0.290135	-0.133289	-0.125801	0.524254	-0.185122	-0.0442733	-0.133765	0.00995914	-0.139656	-0.228968	0.294209	-0.127683
YNL224C	Sqs1	S(105)	YDsSTDLQAGR	1	-0.355787	-0.500289	0.0182409	0.297257	0.117309	0.0606306	0.468422	0.303013	-0.0990325	0.132048	-0.149153	-0.29266
YNL225C	Cnm67	T(107)	DKSPIGtDVHK	1	-0.421708	-0.157647	0.345616	0.353115	0.00891005	0.443097	-0.12205	-0.372086	0.491976	0.0259994	-0.302744	-0.292479
YNL225C	Cnm67	T(121)	DVPNFIHStPR	1	-0.781256	-0.785257	-0.185998	-0.440422	-0.3252	-0.184439	-0.0722398	-0.0244881	0.246315	0.441091	1.11838	0.993514
YNL225C	Cnm67	S(17);S(20)	LDsPVsENGEIKDGEPIPQNWLNENHVGK	2	0.241554	0.47284	0.11917	-0.173879	-0.27956	-0.470081	0.0196684	0.190973	-0.0966565	-0.188709	-0.00417601	0.168857
YNL225C	Cnm67	S(103)	DKsPIGTDVHKK	1	-0.00495824	0.0189569	0.32245	0.249452	0.0409228	0.241473	-0.228454	-0.247697	-0.0294703	0.0381672	-0.10049	-0.300352
YNL227C	Jjj1	T(504)	GLQtDDDEDWSTK	1	-0.270659	-0.711736	-0.222342	-0.257421	0.114685	0.288014	-0.123162	-0.0059154	0.160894	0.439641	0.340584	0.247417
YNL229C	Ure2	S(68)	NGsQNNDNENNIK	1	0.844582	1.12686	-0.0605046	-0.456682	-0.296254	-0.0608108	-0.694364	-1.25476	0.506845	0.46725	-0.300304	0.178146
YNL232W	Csl4	S(94)	SVDAsPNDVTR	1	-0.595726	-0.479692	0.297976	0.370307	0.166879	0.560453	-0.0367553	-0.204294	0.414206	0.231546	-0.24658	-0.47832
YNL233W	Bni4	S(747)	QGQLHTFEQDGsEINDNEFENEDFNK	1	-0.644305	-0.646207	-0.473209	-0.442111	-0.313974	-0.241693	0.643806	0.996952	0.17417	-0.416416	0.613512	0.749476
YNL233W	Bni4	S(133)	AQNIESSIIEEEEEAEEQNNsINYHEDITGSR	1	0.041732	0.304021	-0.219568	-0.24682	-0.0126193	-0.130077	-0.0795089	-0.0972564	0.167468	0.11147	0.102496	0.0586625
YNL243W	Sla2	T(294);S(308)	TPARtPTPTPPVVAEPAIsPRPVSQR	2	0.390023	0.489244	-0.14772	0.125581	0.346078	-0.196162	-0.111857	-0.0301624	-0.547774	-0.575541	0.0712495	0.18704
YNL243W	Sla2	S(284)	EPsVTPAR	1	-0.0452717	-0.0751196	0.177515	0.473058	-0.111049	0.195577	-0.198639	-0.375006	0.286153	0.0203418	-0.108708	-0.238851
YNL243W	Sla2	S(308)	TPTPTPPVVAEPAIsPRPVSQR	1	0.0944456	0.113998	0.241956	0.586048	1.08532	0.86295	-0.768698	-1.14879	-0.642597	-0.250543	-0.010429	-0.163659
YNL246W	Vps75	S(3)	MMsDQENENEHAK	1	-0.0400899	-0.176415	0.361772	0.21455	0.181602	0.472873	-0.334711	-0.460657	0.046479	0.222602	-0.215052	-0.272953
YNL247W	Ynl247W	S(326)	GQLDLINDGEGsLSNFADNGK	1	-1.10022	-1.2937	-0.829927	-1.56272	-1.02078	0.184116	2.24483	2.56503	0.703483	0.391775	0.00261028	-0.284498
YNL265C	Ist1	S(244)	QNsENIK	1	0.147706	-0.0263317	0.902097	0.427586	0.0877203	0.547709	-1.16693	-1.06305	0.40166	0.216957	-0.372248	-0.102866
YNL267W	Pik1	S(396)	TNsQPLSR	1	-0.156252	0.0763473	0.0479303	0.152357	0.0588383	0.125512	0.232036	-0.00211117	0.3385	0.341799	-0.521052	-0.693905
YNL267W	Pik1	S(10)	KsFDDTIELK	1	-0.0585987	0.126843	0.328801	-0.101184	0.0697644	0.102092	-1.04958	-0.746884	0.495589	0.433505	0.214021	0.185629
YNL272C	Sec2	S(640)	SANNNEENsDCGDKK	1	-0.189116	-0.00659578	0.630775	0.67621	0.27934	1.1128	-0.532705	-1.31669	0.110159	0.0440238	-0.298452	-0.509744
YNL272C	Sec2	S(515)	IGPLVEDDsDEDQNDAISVR	1	-0.119978	-0.573986	0.348356	1.99511	0.322421	-0.119804	-0.641563	-0.810667	-0.0234164	-0.27256	0.114181	-0.218097
YNL272C	Sec2	S(515);S(524)	IGPLVEDDsDEDQNDAIsVR	2	-1.03003	-1.57508	-1.06983	-0.853274	-0.465647	0.0625717	0.594172	0.0951682	0.533352	0.912545	1.43799	1.35807
YNL272C	Sec2	S(549)	RPFSSSSAEEsQK	1	-0.00378274	0.320786	0.481306	0.887085	0.317062	0.660146	-0.555372	-1.05874	-0.0404007	-0.535132	-0.198812	-0.274144
YNL273W	Tof1	S(1213)	SLEASAADEsDEDEEAIR	1	0.246239	0.206986	0.340969	0.217556	0.246581	0.467078	-0.128159	-0.231807	-0.219769	-0.236303	-0.485861	-0.42351
YNL287W	Sec21	T(669)	ADANSFAGPNLDNHQEDLLAtK	1	-0.310757	-0.570846	-0.40462	-0.609413	-0.544656	-0.470975	0.994092	1.07269	0.0337855	0.234028	0.232155	0.344517
YNL292W	Pus4	S(254)	VEEPFPLsEQEEQEIQK	1	-0.395403	-0.205504	0.38529	-0.369992	-0.0869141	0.244205	-0.109222	0.115396	0.242746	0.271955	-0.0364974	-0.056061
YNL293W	Msb3	S(119)	AEGEDDDDNNGDNGNEDLEEVHsDDLDLVPDDDNR	1	-0.152014	0.250225	0.474305	0.283563	0.334787	0.557562	-0.325708	-0.356979	0.234718	0.00126704	-0.566089	-0.735638
YNL298W	Cla4	S(425)	QPQsPLSSQSTQNQAIPR	1	0.104568	0.543764	-0.340072	-0.112254	0.398838	-0.281694	0.571467	0.719925	-0.892883	-1.33252	0.158082	0.462778
YNL298W	Cla4	S(26)	ISDNDFQNIGPAPRPPsSNSQGR	1	-0.013482	-0.362614	0.0484047	0.201016	-0.142301	0.176365	0.578592	0.498413	-0.151503	-0.0849265	-0.319711	-0.428253
YNL298W	Cla4	T(353)	NGHSPtNGQFPR	1	0.148758	0.0348463	-0.0506732	0.215293	0.247198	0.430566	0.136634	-0.120514	-0.45549	-0.232212	-0.0264272	-0.32798
YNL298W	Cla4	S(351)	NGHsPTNGQFPR	1	0.101577	-0.112006	-0.0383896	0.542617	0.245825	0.309728	0.0353818	0.110421	-0.252298	-0.421179	-0.0920962	-0.429581
YNL298W	Cla4	S(445)	YAQNSsPTAAHFQPQR	1	-0.0629208	-0.174211	0.224538	0.281062	0.226871	0.477314	-0.0139821	-0.0426275	-0.362961	-0.255482	-0.0115445	-0.286056
YNL302C	Rps19B	S(125)	RIsENGQR	1	-1.03429	-0.94561	-0.123193	0.320619	-0.394688	-0.0181445	1.34016	1.19481	1.01631	0.78302	-0.804307	-1.33469
YNL304W	Ypt11	S(159)	RYSsNDFEK	1	0.0577397	-0.189669	-0.0359779	-0.0105946	-0.041137	0.118032	-0.39298	-0.160216	0.212978	0.184995	0.199377	0.0574529
YNL307C	Mck1	Y(199)	KLEHNQPSISyICSR	1	0.0858327	0.55265	0.179957	0.194892	0.0931993	-0.50907	-0.0401118	0.223973	-0.12586	-0.844568	-0.193017	0.382123
YNL307C	Mck1	S(198)	KLEHNQPSIsYICSR	1	-0.0118291	0.399876	0.228444	0.146638	0.266919	-0.177416	-0.26311	0.136467	-0.160933	-0.723054	-0.0594908	0.217489
YNL308C	Kri1	S(486)	EVsPESFGLTAR	1	-0.175893	0.391417	0.122325	-0.00449598	0.316542	-1.04156	0.0196875	0.986191	-0.278018	-1.29491	-0.00464374	0.963355
YNL308C	Kri1	Y(482)	yREVSPESFGLTAR	1	0.41396	-0.116969	-0.562939	0.613281	0.214676	0.0871908	0.289664	-0.237406	-0.597308	-0.366834	0.241947	0.0207365
YNL309W	Stb1	T(164)	KEDTPStPR	1	0.188237	0.0637841	0.243546	0.452628	0.195554	0.23222	-0.594424	-0.791623	-0.23298	-0.0411917	0.200067	0.0841824
YNL309W	Stb1	T(138);S(141)	FVEKPNtPPsSR	2	0.163483	-0.0753359	0.298201	0.440574	0.158469	0.160933	-0.458991	-0.302293	0.112805	0.0761963	-0.273967	-0.300074
YNL309W	Stb1	T(138)	FVEKPNtPPSSR	1	0.173049	0.326021	0.729364	0.590896	0.267078	0.545095	-0.596092	-0.707292	-0.27076	-0.358809	-0.302639	-0.39591
YNL323W	Lem3	S(36)	DKGAIVSGDNPEEEEDVDAsEFEEDEVKPVR	1	-0.528837	-0.57169	0.108271	-0.198837	-0.00574167	0.29966	-0.134325	-0.214241	-0.110685	0.0648397	0.671317	0.620268
YNL330C	Rpd3	S(408)	DAEDLGDVEEDsAEAK	1	-0.661336	-0.419308	0.234903	-0.100462	-0.338584	-0.0358353	-0.202563	0.00911284	0.918312	0.875244	0.0492687	-0.328751
YNL330C	Rpd3	T(394)	YAPSVQLNHtPR	1	0.013152	0.261771	0.395713	-0.0276176	-0.188417	0.0233418	-0.0765149	-0.349711	-0.0809528	-0.0983403	-0.0629802	0.190555
YNL330C	Rpd3	T(414)	DAEDLGDVEEDSAEAKDtK	1	0.174801	0.13318	-0.476959	-0.5008	-0.446107	-0.511481	0.565821	0.611799	-0.0147663	0.188838	0.197211	0.0784646
YNR002C	Ato2	S(21);S(22)	ALDssEGEFISENNDQSR	2	3.55964	3.51637	-0.47064	-0.402841	-0.746815	-0.863743	-0.870781	-0.697999	-0.368171	-0.422777	-1.10324	-1.12901
YNR002C	Ato2	S(21)	ALDsSEGEFISENNDQSR	1	2.78357	5.06564	0.115396	-0.944669	-0.823619	-0.933165	-0.13932	-0.462457	-0.903103	-0.306837	-1.03292	-2.41851
YNR002C	Ato2	S(37)	HsQESICK	1	1.09784	1.8672	-0.0720841	0.84053	0.0100812	0.124269	-0.0214647	-0.955877	-0.433971	-0.722453	-0.580405	-1.15367
YNR012W	Urk1	S(14)	SSsFISILDDETR	1	-0.436354	-0.177034	-0.0547599	-0.039536	0.35042	-0.469621	-0.318271	0.115509	-0.202248	-0.418999	0.661213	0.98968
YNR013C	Pho91	S(312)	INNDENSsGNEEDEDGNR	1	-1.2314	-0.290003	1.26469	1.01508	0.839668	1.39316	-0.530061	-0.810623	0.323806	-0.275598	-0.666704	-1.03201
YNR013C	Pho91	S(311);S(312)	INNDENssGNEEDEDGNR	2	-0.452172	-0.380496	-0.0554094	-0.313849	0.14709	0.220593	-0.0858497	0.165333	0.509031	0.358998	-0.06269	-0.0505784
YNR013C	Pho91	S(295)	RPsNTFNLDADR	1	-0.757259	-0.800632	0.00359193	0.0788213	-0.0813192	0.0645234	-0.393415	-0.497492	0.514436	0.459265	0.713965	0.695515
YNR014W	Ynr014W	S(198)	RNsVAVK	1	-0.648277	-1.10306	-0.348251	-0.114988	-0.463151	-0.261157	1.13328	0.89009	0.710928	0.802834	-0.384534	-0.213717
YNR014W	Ynr014W	S(137)	RAsEPQLPSFDNR	1	-0.517659	-0.630749	-0.101513	0.0611263	-0.193924	-0.0377681	0.377919	0.382182	0.299073	0.322175	0.136105	-0.0969658
YNR016C	Acc1	S(1157)	AVsVSDLSYVANSQSSPLR	1	0.725384	0.89775	-0.31092	-1.39272	0.21353	-1.01141	0.259208	0.805455	-1.41345	-0.871188	0.526243	1.57212
YNR019W	Are2	S(182)	KSSPDAVDsVGK	1	-0.426582	-0.467205	-0.0290009	-0.120078	-0.0104278	0.00959607	0.472012	0.497184	0.596016	0.928193	-0.602017	-0.847689
YNR019W	Are2	S(176);S(182)	KSsPDAVDsVGK	2	-0.721369	-0.746545	-0.294866	-0.337797	-0.482516	-0.325962	0.570103	0.861562	1.42228	1.56314	-0.493634	-1.0144
YNR034W	Sol1	S(65);S(68);S(71)	VNsVRsNAsSR	3	-0.492602	-0.552113	-0.507567	-0.189778	-0.279755	-0.199355	0.604991	0.225436	0.781407	0.78394	-0.106474	-0.0681307
YNR034W	Sol1	T(320)	FYDDENLtE	1	0.237919	0.117758	0.0489172	0.276192	-0.115612	0.0800226	0.00437322	-0.228682	-0.0485858	-0.0790178	-0.127012	-0.166272
YNR035C	Arc35	S(324)	AKVDEDDENDELsAEGR	1	-0.255859	-0.216484	0.148684	0.166727	-0.0193595	-0.0330709	-0.0793032	-0.116371	0.267645	0.412486	-0.0618077	-0.213287
YNR039C	Zrg17	S(137)	GIsPDAGSSK	1	-0.425002	-0.343363	-0.396195	0.0805784	-0.362333	-0.115821	0.494465	0.255247	0.802651	0.430941	-0.113586	-0.307581
YNR047W	Fpk1	S(341)	DTLNGSPsR	1	-0.328728	-0.0210043	0.717922	0.53248	0.61147	0.875339	-0.511635	-0.822316	-0.023445	-0.0158217	-0.465584	-0.548676
YNR047W	Fpk1	S(300);S(303)	NLsNLsLNEIKENEEVQEFNNEDFFFHDIPK	2	-0.131401	0.464564	-1.371	-1.53618	-0.258168	-1.25385	0.549657	0.577667	0.100933	0.31179	1.10998	1.43601
YNR047W	Fpk1	S(414)	AAsEPNGLQLASATSPTSSSAR	1	0.0112336	0.70824	0.034532	-0.364512	0.283873	-0.617485	0.806614	1.29571	-0.624851	-1.30374	-0.511402	0.281788
YNR047W	Fpk1	S(392)	NLsPTK	1	0.182929	0.116163	0.515647	0.367581	0.306054	0.590197	-0.673515	-0.87171	-0.0933732	-0.0539674	-0.237741	-0.148263
YNR047W	Fpk1	S(815);S(818)	QTsQDsHKHLDEQEK	2	-0.134912	-0.350809	0.159001	0.123213	0.0572023	0.425602	-0.331359	-0.571159	0.161498	0.191765	0.0885701	0.181389
YNR051C	Bre5	S(293)	EGSVEAINAVNNSsLPNGK	1	0.370822	0.87212	-0.367544	-0.729454	-0.409043	-0.898056	0.45905	0.89421	0.00884554	-0.606912	-0.06213	0.468093
YNR052C	Pop2	S(39)	QASEQHQQQNMGPQVYsPQVNR	1	0.592934	0.247303	-0.115322	0.48938	0.156264	0.271894	-0.645221	-1.01485	-0.436671	-0.228905	0.448016	0.23518
YNR053C	Nog2	S(60)	AAsFQDSTIPDAR	1	-0.773114	-0.591307	-0.1442	0.0900707	0.0932786	-0.125954	1.96636	1.19612	-0.627568	0.286163	-0.514754	-0.855089
YNR054C	Esf2	S(47);S(51)	AEDIEsENEsDIEEEQKQEEKEDVEQPDKENGEK	2	-0.788104	-0.709109	0.290139	0.0785377	0.322944	0.602878	-0.378173	-0.0210375	0.639143	0.296707	-0.0859495	-0.247976
YOL004W	Sin3	S(318)	VTTPMGTTTVNNNISPsGR	1	0.264659	0.706152	0.673466	-0.138209	-0.101821	-0.645108	-0.316032	-0.660282	-0.277273	-0.207236	-0.242998	0.944683
YOL004W	Sin3	S(1050)	QNVSESSGSDDGsSIASR	1	0.148731	0.690542	0.441488	0.280299	0.15341	-0.288313	-0.140249	0.0688272	-0.328025	-0.809659	-0.275355	0.058304
YOL006C	Top1	S(24);T(26)	VNHELSSDDDDDVPLsQtLKK	2	0.726429	0.648425	-0.358572	-0.378126	-0.245059	-0.466671	0.0805273	0.0746246	-0.407125	-0.366735	0.2038	0.488482
YOL006C	Top1	S(14);S(15)	VNHELssDDDDDVPLSQTLK	2	0.0830159	0.392341	-0.0651954	-0.0470183	0.187023	-0.388178	-0.151914	0.25057	0.0215364	-0.486363	-0.0744658	0.278648
YOL016C	Cmk2	S(367)	NMYSLGDDGDNDIEENsLNESLLDGVTHSLDDLR	1	0.804605	0.483486	-1.1739	-0.579498	-0.0357145	-0.580029	0.608396	0.487224	-0.498447	-0.324495	0.295061	0.513313
YOL039W	Rpp2A	T(55)	SVDELItEGNEK	1	-0.346179	-0.0906338	0.263496	0.183137	0.106946	0.374804	-0.0486313	-0.0287782	0.136517	-0.156493	-0.112148	-0.282035
YOL041C	Nop12	S(65)	EAsKPDVSDEQTEEVALPK	1	-0.579184	-0.974858	-0.0644229	-0.614218	-0.218816	-0.203738	0.217677	0.875446	0.5871	1.04948	0.0576452	-0.13211
YOL045W	Psk2	S(680)	ENEIDVVGsR	1	-0.345547	-0.810365	0.0764811	0.887514	-0.0513663	-0.0812372	-0.129832	-0.103814	0.286348	0.315919	0.163916	-0.208017
YOL051W	Gal11	T(835)	NGtPNPNNMK	1	0.235407	0.563485	0.170578	-0.0370652	0.0531097	0.0398677	-0.219429	-0.561251	-0.4241	-0.401182	0.184434	0.396145
YOL051W	Gal11	S(798);T(808)	KLsISNAASQQPtPR	2	-0.593202	-0.353457	-0.371667	0.360407	-0.216503	-0.160544	-0.199884	-0.531875	0.213695	-0.218572	1.16756	0.904041
YOL051W	Gal11	T(1056)	IKVDSPDDPFMtK	1	0.660756	0.332272	0.180195	-0.0646123	0.146551	0.267576	-0.62679	-0.582033	-0.135147	0.0504695	-0.225566	-0.00367222
YOL054W	Psh1	S(191)	DEFDEEEYsEGELDEIR	1	-0.842848	-0.490236	0.364837	-0.195491	0.245701	0.499032	-0.35273	-0.182628	0.846119	0.4796	-0.261079	-0.110276
YOL054W	Psh1	S(143)	NSALAVADDsDDGITR	1	0.156822	0.455729	0.0824525	-0.190204	0.107762	-0.402142	0.0482084	-0.111451	-0.472469	-0.205422	0.077224	0.45349
YOL054W	Psh1	S(251)	sIAVDAVDDEDDEEEDEEEEEEMDSDLKDFIEDDEDDEDEDGSRR	1	0.231924	0.00427525	0.257223	-0.106161	-0.0271446	0.00701651	-0.148619	-0.328828	-0.462658	-0.0807429	0.149274	0.504441
YOL054W	Psh1	T(310)	HVIItDDEEEEQR	1	0.0282734	-0.178531	0.0742636	0.275768	0.122538	0.243275	-0.371211	-0.505869	0.114471	0.12451	0.0316649	0.0408471
YOL054W	Psh1	S(275)	SIAVDAVDDEDDEEEDEEEEEEMDsDLKDFIEDDEDDEDEDGSRR	1	0.325037	0.399368	-0.405392	-0.547867	0.0414298	-0.466187	-0.159734	0.0902126	-0.18905	0.102015	0.38771	0.422457
YOL059W	Gpd2	S(72)	SDsAVSIVHLK	1	-0.22874	-0.682211	-0.541683	-0.29082	0.0663007	0.265909	-0.160445	0.636006	-0.177458	0.128511	1.04202	-0.0573959
YOL060C	Mam3	S(637)	DWDESKsEYGNENINQENSNR	1	-1.06305	-1.44695	-0.395621	-0.84812	-0.678772	-0.115418	0.606341	0.661585	0.725495	1.0057	0.805607	0.743198
YOL060C	Mam3	S(527)	EPsPAPHSNDK	1	-0.129558	0.243462	0.916329	0.755866	0.329978	0.59189	-0.472954	-0.649077	0.0380252	-0.150667	-0.68182	-0.791474
YOL060C	Mam3	S(678)	FKNENAsNNDR	1	-0.674888	-0.903534	-0.532803	-0.599127	-0.193125	-0.245615	1.16541	1.11633	0.362861	0.733969	-0.127455	-0.10202
YOL061W	Prs5	S(183)	KTLsFSR	1	-0.787686	-1.20705	-0.533606	-0.516482	-0.206287	-0.164775	0.515079	0.406578	0.533037	0.954282	0.479464	0.527444
YOL078W	Avo1	S(433)	SNsNEFNAQNR	1	0.593255	1.35179	0.328675	-0.332555	-0.376812	-0.480245	0.0441215	0.703556	-0.0560939	-1.47363	-0.533145	0.231082
YOL081W	Ira2	S(870)	GsSPSLCSTTR	1	0.489571	1.40088	0.318087	0.906064	-0.35552	-0.121785	-0.206766	-0.693231	0.280311	-0.817841	-0.525683	-0.674092
YOL083W / YOL082W	Atg34 / Atg19	S(136)	EDAHEDPVsPK	1	0.366762	0.23376	0.503319	0.511082	0.189911	0.426036	-0.199025	-0.366456	-0.295082	-0.208717	-0.565886	-0.595704
YOL084W	Phm7	S(844)	RPYDEDDHsK	1	-0.178574	0.0714685	0.34436	1.44751	0.00378342	0.660404	0.875504	-0.166925	-0.562182	-1.05605	-0.482891	-0.9564
YOL092W	Ypq1	S(202)	IDEEMAAPsSDGNVGDDNLR	1	-1.19013	-0.939095	-0.686712	-0.809839	-0.266757	-0.461102	1.23372	0.968635	0.443779	1.11432	0.4661	0.127081
YOL100W	Pkh2	S(138)	TLDNIAGsPHMEK	1	0.587328	0.678924	0.399756	0.0804179	-0.025532	0.104601	-0.5307	-0.62232	-0.240681	-0.0993975	-0.19017	-0.142226
YOL109W	Zeo1	S(40)	EQAEAsIDNLK	1	-0.309457	-0.569277	-0.534233	-0.597184	-0.726248	-0.220616	1.43133	1.50756	0.939439	1.1368	-0.800827	-1.25728
YOL109W	Zeo1	S(40);T(49)	EQAEAsIDNLKNEAtPEAEQVK	2	-0.558428	-0.624437	-0.651869	-0.886403	-0.49551	-0.40014	2.09923	1.70529	0.440607	1.26648	-0.834028	-1.06079
YOL109W	Zeo1	S(25)	LEETKEsLQNK	1	-0.94496	-1.15934	-0.837263	-0.794086	-0.841381	-0.123615	1.82136	1.58209	1.19987	1.494	-0.397631	-0.999052
YOL109W	Zeo1	T(49)	EQAEASIDNLKNEAtPEAEQVK	1	-0.0122411	0.274721	-0.121331	-0.419969	-0.751191	-0.286005	0.614796	0.501724	1.20499	1.569	-0.935021	-1.63947
YOL109W	Zeo1	S(89)	QASAAVsEK	1	1.16002	0.392829	-0.655122	-0.279503	-0.481342	0.159568	-0.226245	0.0793654	0.342648	0.317878	-0.139955	-0.670137
YOL111C	Mdy2	S(115)	ASHIsEIK	1	-0.608026	-0.678598	0.0612114	0.149846	0.476147	0.501851	-0.70294	-0.52692	0.115932	0.0203146	0.657675	0.533507
YOL123W	Hrp1	S(2);S(3)	MssDEEDFNDIYGDDKPTTTEEVK	2	-0.3238	0.116144	0.523674	0.300751	0.476284	0.557067	0.176204	0.407361	0.652062	0.456632	-1.50442	-1.83795
YOL123W	Hrp1	T(91)	QNGTANDKEGSNEDtK	1	-0.0655091	0.188529	0.0898297	-0.745784	-0.462432	-0.765006	0.0213964	-0.0306856	0.82668	1.58731	-0.409965	-0.234359
YOL138C	Rtc1	S(1084);S(1086)	FTYNsVsPR	2	0.243227	0.228747	-0.164707	0.0632799	-0.00813034	0.0833383	-0.423327	-0.744615	0.0933591	0.246786	0.259579	0.122463
YOL139C	Cdc33	S(15)	FEENVsVDDTTATPK	1	-0.733796	-0.946347	-0.526964	-0.528855	-0.26927	0.129549	1.32088	0.951865	0.336591	0.625896	-0.127443	-0.232109
YOL144W	Nop8	S(229);S(234)	DENVCsGEMDsDENMSEEEKEK	2	-0.936246	-0.855546	0.763934	0.260216	0.33627	0.791933	-0.234676	0.113165	0.49081	0.141612	-0.420092	-0.45138
YOL144W	Nop8	S(229);S(239)	DENVCsGEMDSDENMsEEEKEK	2	-0.810241	-0.671678	0.408701	-0.0992807	0.379506	0.440933	0.0474572	0.323616	0.462383	0.577951	-0.487806	-0.571541
YOL144W	Nop8	S(268)	DFDFDKPMTLNDsDEELLTEQR	1	-0.379142	-0.436793	0.153833	-0.241258	0.222197	0.275951	-0.0443588	0.171897	0.194108	0.305348	-0.146637	-0.0751456
YOL144W	Nop8	S(377)	LIEDsDNDIDHAK	1	-0.539681	-0.629383	0.0527846	-0.157677	0.142003	0.203425	-0.196596	0.272767	0.534374	0.407391	0.00711504	-0.0965223
YOL145C	Ctr9	S(977);Y(983)	DNSDLsDKDNEyDEEKPR	2	-0.779019	-0.486905	0.614932	0.226747	0.30611	0.89337	-0.459707	-0.535735	0.669986	0.29687	-0.352301	-0.394347
YOL145C	Ctr9	Y(983)	DNSDLSDKDNEyDEEKPR	1	0.288952	0.539702	0.737931	0.672629	0.402555	0.57132	-0.723888	-0.649324	-0.0648732	-0.284659	-0.640678	-0.849669
YOR004W	Utp23	S(217)	KVNSPsDEVK	1	-0.484986	-0.616215	0.0130178	0.866816	-0.298117	-0.12134	-0.322738	-0.322815	1.18555	0.791906	-0.0927274	-0.598352
YOR008C	Slg1	T(356)	RISNGtFINGGPGGK	1	-0.080571	0.338392	0.232656	0.373569	0.435636	0.159847	-0.708392	-0.587815	0.188313	0.035504	-0.0676421	-0.319496
YOR014W	Rts1	S(234);S(236)	SsHsFER	2	-0.753431	-0.719897	0.271596	0.58912	0.188182	0.463713	-0.0450554	0.00199962	0.723728	0.390035	-0.38502	-0.72497
YOR014W	Rts1	T(257)	LNPDTDLELIKtPQR	1	-0.927096	-1.11397	0.0602109	-0.480839	0.552533	0.596171	-0.691125	-0.059523	0.769397	0.978437	0.23608	0.0797188
YOR014W	Rts1	S(236);T(242);T(244)	SSHsFERLPtPtK	3	-0.48573	-0.274478	-0.313501	0.00528138	0.16558	0.185353	0.0944818	0.092706	0.627475	0.576681	-0.0883061	-0.585544
YOR018W	Rod1	S(617)	RNsYSR	1	-0.814588	-0.494918	-0.452022	-0.0865655	0.461601	-0.0484047	0.304514	1.00673	0.429169	-0.494703	0.0713265	0.117865
YOR028C	Cin5	S(196)	KNsATTNLPSEER	1	0.0691668	-0.309354	-0.203608	-0.473705	-0.545384	-0.122176	1.71847	2.06988	-0.0198044	0.004557	-1.01884	-1.1692
YOR028C	Cin5	S(89)	TGsLTDLSGR	1	-0.206573	-0.100779	0.0419103	0.250961	-0.386704	-0.199528	1.20266	1.26715	-0.0810456	-0.31684	-0.570253	-0.900962
YOR042W	Cue5	S(407)	KNPDEDEFLINsDDEM	1	0.0776443	-0.0926635	0.0462938	-0.374618	-0.172239	-0.215919	-0.474737	-0.174399	0.328873	0.8176	0.194165	0.0400002
YOR042W	Cue5	S(96)	RKSEEEPsKENPILQELK	1	0.270349	0.82213	0.0429139	-0.470798	-0.191267	-0.834019	-0.734027	-0.355778	0.187597	-0.208513	0.424434	1.04698
YOR042W	Cue5	T(369)	VVAETTYIDTPDTEtK	1	0.620936	0.474824	-0.0634389	-0.321114	0.485451	0.263961	-0.13441	0.417963	-0.980606	-0.759774	0.0720683	-0.0758609
YOR042W	Cue5	T(50)	DGtPKVEEK	1	0.570747	0.483644	-0.231387	-0.278539	-0.782273	-0.578278	0.215102	-0.113729	0.453403	0.548584	-0.225592	-0.0616817
YOR048C	Rat1	S(565)	AESECDLDAEIKDEIVADVNDRENsETTEVSR	1	-0.0908324	0.395445	-0.0780773	-2.01766	-0.577299	-0.514043	0.683352	1.17632	-0.031593	0.495913	0.0944504	0.464021
YOR048C	Rat1	S(543)	AEsECDLDAEIKDEIVADVNDRENSETTEVSR	1	-0.487844	-0.423985	-0.242474	-0.54688	0.242551	0.00863851	0.600277	1.06528	-0.344554	-0.447433	0.232044	0.344375
YOR051C	Ett1	S(38)	sQMSVELDDDADLDDELAQLK	1	1.32231	1.61596	-0.134101	-0.569925	-0.448691	-0.904849	-0.567142	-0.614296	-0.373762	0.0880131	0.201388	0.385099
YOR051C	Ett1	S(33);T(34)	KSDEPSREstPVR	2	0.147555	0.0423215	-0.224523	-0.434028	-0.457411	-0.44677	0.0744141	0.101052	0.354835	0.518919	0.105129	0.218506
YOR052C	Tmc1	S(43)	KSDsGTVLGAIPLNSR	1	0.226298	0.727092	-0.0830279	-0.516413	0.226814	-0.335426	0.854273	1.14456	-0.518209	-0.585142	-0.706148	-0.434676
YOR052C	Tmc1	S(60)	SSSNsSVTSTGQSSR	1	1.30365	2.52886	0.615516	0.228789	0.912737	-0.614941	-0.416591	0.0210736	-1.2826	-1.86197	-1.13271	-0.301813
YOR063W	Rpl3	S(297)	GDDEANGATsFDR	1	-0.198035	-0.24078	0.107362	0.307005	0.178118	0.369045	0.132929	-0.232889	-0.168068	-0.0542818	-0.0523064	-0.148098
YOR070C	Gyp1	S(91)	TSNSYsPLR	1	0.184338	0.271926	0.32686	0.535023	0.0501542	0.267564	-0.177582	-0.550216	-0.183029	-0.298428	-0.200742	-0.225868
YOR070C	Gyp1	S(87)	RTsNSYSPLR	1	-0.247002	-0.545377	0.202313	0.612587	0.0685108	0.3328	-0.201647	-0.444319	0.00986152	0.0971229	0.167964	-0.0528134
YOR078W	Bud21	S(31)	FDADESPASASAVTDRQDDVLVIsK	1	0.181289	0.489416	-1.13635	-1.20347	-0.434255	-0.862885	1.49641	1.55431	-0.641534	-1.10377	0.534441	1.1264
YOR083W	Whi5	T(215)	TLPELETELAPAVQtPPRR	1	0.207931	0.216754	0.087399	0.37041	-0.140086	-0.230877	-0.186281	-0.135394	-0.131532	-0.275146	0.162569	0.0542533
YOR083W	Whi5	T(57);S(59);S(62)	LKNGFGtPsPPsPPGITK	3	0.407473	0.337138	-0.0530848	-0.148945	-0.0628458	-0.449696	-0.461408	-0.221795	0.0739195	0.181879	0.0959465	0.301419
YOR089C	Vps21	S(188)	TAEEQNSASNEREsNNQR	1	-0.899228	-0.912358	-0.408381	-0.736993	-0.559446	-0.402498	0.505034	0.403467	0.676938	1.04228	0.685084	0.606099
YOR089C	Vps21	S(181)	TAEEQNsASNER	1	-0.923785	-0.956125	-0.481193	-0.791685	-0.303624	-0.232698	0.408061	0.19232	0.572888	0.807782	0.727652	0.980408
YOR092W	Ecm3	S(312);S(316)	RNsITGsLR	2	-0.550806	-0.523397	0.0934173	0.106537	0.131039	0.21044	-0.323642	-0.465524	0.367178	0.348493	0.282814	0.32345
YOR092W	Ecm3	S(312)	RNsITGSLR	1	-0.442502	-0.566491	0.229211	0.352961	0.428709	0.41444	-0.408381	-0.435512	0.0141767	0.108112	0.178786	0.12649
YOR092W	Ecm3	S(278)	TNHVDAQsVSELNDPTYR	1	-0.254682	-0.372747	-0.137713	0.126345	-0.101843	0.100333	0.522255	0.255575	-0.137238	-0.0136267	0.109221	-0.0958789
YOR098C	Nup1	S(252)	SSIsNGNLATGPNLTSEIEDLR	1	0.0536834	-0.00958999	-0.600886	-0.679048	0.114351	0.171506	0.466641	0.50497	0.157266	0.262759	-0.191054	-0.250597
YOR109W	Inp53	S(986)	EKsPTPQTSTASLSSVTK	1	1.5975	1.73616	-0.57052	-1.09399	-0.794544	-1.01465	0.445497	0.389297	-1.06337	-0.923709	0.385446	0.906901
YOR110W	Tfc7	S(365)	TAGLLsPTEENETTNAGQSK	1	0.373229	0.404847	-0.246424	-0.613406	-0.116072	0.126574	-0.0150446	-0.204787	0.372463	0.622378	-0.368151	-0.335607
YOR113W	Azf1	S(229)	RESNsMRPPLLIPAATTK	1	-0.591118	-0.410728	-0.795828	-0.693237	-0.191932	-0.702818	0.44412	0.770993	0.809257	0.678767	0.3255	0.357023
YOR113W	Azf1	S(303)	RNsFVR	1	-0.304052	-0.202893	-0.283225	0.573674	-0.272179	0.0780386	0.299927	-0.31452	0.585524	0.295643	-0.0259947	-0.429942
YOR123C	Leo1	S(372)	KQNsPTTYGASR	1	0.610476	0.708959	0.191566	0.0274165	-0.116505	-0.487403	-0.337922	-0.194474	-0.269891	-0.55339	-0.0777239	0.498891
YOR123C	Leo1	S(358)	EKEKQEsPDAAFETGFR	1	1.0324	1.18212	-0.379054	-0.367925	-0.477333	-0.786022	0.272959	0.418894	-0.170146	-0.388191	-0.278826	-0.0588714
YOR123C	Leo1	Y(124)	FyGEDANNFSDQDETTHTFK	1	0.0453914	0.483801	0.260525	-0.0791954	0.0910814	-0.611265	-0.40077	0.0804646	0.133988	-0.388671	-0.130215	0.514865
YOR123C	Leo1	S(105)	HREsLGLDDDEAEEQAMYTR	1	-0.100078	0.17975	-0.00801557	0.335397	0.0422915	-0.221511	-0.119947	-0.329056	0.00123264	0.0146405	0.184516	0.0207793
YOR123C	Leo1	S(132)	FYGEDANNFsDQDETTHTFKEENVELVR	1	-0.386174	0.309704	0.283894	-0.331169	0.242234	-0.257426	-0.154064	0.26195	0.122618	-0.122012	-0.108508	0.138953
YOR124C	Ubp2	S(907)	KKNESNDAEVsENEDTTGLTSPTR	1	-0.109815	-0.264868	-0.00142312	-0.0873588	-0.230253	0.0722571	0.107697	0.00158612	0.472675	0.462791	-0.238881	-0.184407
YOR124C	Ubp2	S(907);T(919)	KKNESNDAEVsENEDTTGLTSPtR	2	0.439877	0.366444	0.248575	0.162889	0.0756302	0.400048	-1.55627	-1.56034	0.248303	0.178065	0.543883	0.452892
YOR124C	Ubp2	S(901);S(917)	KKNEsNDAEVSENEDTTGLTsPTR	2	0.173634	0.394914	0.086144	0.510722	0.00949266	0.0198061	-0.490474	-1.5194	0.100909	0.248983	0.120293	0.344981
YOR124C	Ubp2	S(917)	KKNESNDAEVSENEDTTGLTsPTR	1	0.187341	0.337452	0.330177	1.17251	0.467892	0.263784	-0.355615	-0.961461	-0.276754	-0.649012	-0.353041	-0.163269
YOR132W	Vps17	S(529);S(532)	IAHTEFDDELFTEDDGYNsQDsDTTSLNAR	2	0.152671	0.21838	0.361124	-0.104989	-0.0272546	0.178701	-0.475611	-0.487829	0.0423241	-0.0456678	-0.0532546	0.241404
YOR132W	Vps17	S(532)	IAHTEFDDELFTEDDGYNSQDsDTTSLNAR	1	0.411165	0.750414	0.0577531	0.0608861	0.306344	0.222523	-0.396375	0.0698021	-0.426936	-0.631637	0.0480496	-0.471988
YOR148C	Spp2	S(123)	GMGWESDSEQDsK	1	0.491005	0.691465	-0.361097	-0.20492	0.0864621	-0.792882	0.182443	0.561832	-0.704349	-0.548332	0.305536	0.292837
YOR153W	Pdr5	S(840);S(841)	SDLssDRK	2	0.069426	-0.0576144	0.578652	0.188511	0.460273	0.798392	-0.105697	-0.0376808	-0.954371	-1.04159	-0.0482826	0.149983
YOR153W	Pdr5	S(837);S(841)	NANDPENVGERsDLSsDRK	2	-0.172735	-0.271749	0.498248	0.219521	0.700961	1.02322	-0.657408	-0.648972	-0.458398	-0.427781	0.0893322	0.105762
YOR171C	Lcb4	T(445);S(454)	GCLtFEPNPSPNsSPDLLSK	2	0.865319	0.796598	0.39428	0.24276	0.588461	0.889173	-0.391771	-0.183116	-0.121559	0.0434108	-1.33473	-1.78883
YOR173W	Dcs2	S(59);S(61)	RPsQsGRSTPIFFHR	2	-0.141661	-0.318563	0.1091	0.45602	-0.260373	0.267496	0.233147	0.169547	0.233019	0.140484	-0.173233	-0.714984
YOR173W	Dcs2	S(342)	HDGIATsPEK	1	0.303955	0.768633	0.0626143	0.118408	-1.23055	-0.951517	0.251134	0.155716	1.47128	1.25087	-0.858431	-1.34211
YOR173W	Dcs2	S(61)	RPSQsGR	1	-0.421578	0.225616	-0.611253	-1.19163	-1.2144	-0.209114	1.26222	2.15128	2.10721	0.701678	-1.12221	-1.67783
YOR173W	Dcs2	S(64)	sTPIFFHR	1	0.245359	0.0749595	-0.200198	-0.221409	-0.999661	-0.214337	0.166761	0.306139	0.814144	0.847665	-0.0264061	-0.793017
YOR178C	Gac1	S(60)	SKsEIFLTSPEK	1	-0.710859	-0.495126	-0.360599	-0.716704	-0.864595	-0.759105	1.02681	0.942191	0.908778	1.02202	0.000462668	0.00672079
YOR189W	Ies4	S(25)	IEDTsPPSANSR	1	-0.266032	-0.0358144	0.354719	0.321551	0.122172	0.32044	-0.0406384	-0.663671	-0.0830727	0.164894	-0.0871483	-0.107399
YOR191W	Uls1	S(335)	KHsGDFADNK	1	0.0822687	0.110968	0.306786	0.528872	0.25495	0.549593	-0.851094	-0.884387	0.205826	-0.106679	0.00126357	-0.198366
YOR195W	Slk19	T(273)	EKEDEENDITNSHINRLtPLYETSAR	1	-0.380405	0.990584	-0.073854	-1.43347	-0.384228	-0.877706	-0.49316	1.08059	0.558014	-0.468757	0.773633	0.708754
YOR195W	Slk19	S(285)	ESNsNEEGRNDYDDDNQLDIR	1	0.120092	-0.202155	0.354982	0.442421	0.232922	0.433433	-0.206809	-0.190958	-0.364963	-0.180223	-0.136224	-0.302517
YOR198C	Bfr1	S(260)	EEEQRLsK	1	-0.176651	-0.443948	-0.0864361	0.565358	0.0897838	-0.024098	-0.58509	-1.13971	-0.0388341	-0.0288898	0.797228	1.07128
YOR198C	Bfr1	S(464)	EQEEsEKDKEN	1	-0.517576	-0.525056	-0.273926	0.247828	-0.228956	0.134385	0.40825	0.158114	0.354669	0.114078	0.257539	-0.129348
YOR204W	Ded1	S(557)	DAMMSAPGsR	1	-0.759224	-0.991076	-0.36506	-0.127414	0.00114367	-0.00245172	1.04576	1.0368	0.0855048	0.363294	-0.00812503	-0.279157
YOR204W	Ded1	S(553)	DAMMsAPGSR	1	-0.566588	-0.930652	-0.34857	-0.0649842	-0.265782	-0.00121595	1.22755	0.972803	0.105852	0.516138	-0.152457	-0.492089
YOR204W	Ded1	S(553);S(557)	DAMMsAPGsR	2	-0.491787	-0.951196	-0.0222031	0.0812826	-0.162617	-0.0191515	0.729556	1.02626	0.0318257	0.395211	-0.0847747	-0.532406
YOR204W	Ded1	S(594)	SRDNsFR	1	-0.779533	-1.36653	0.203056	-0.0878631	0.581539	0.716979	0.259287	0.58003	-0.465541	0.258399	0.201193	-0.101018
YOR206W	Noc2	S(166)	NSNIEEKsEQMELEK	1	-0.888884	-1.31966	0.24831	-0.258191	0.222261	0.640747	-0.179276	-0.0879282	0.584992	0.673961	0.0125971	0.351072
YOR206W	Noc2	Y(127)	yLEENDKDLLDFAGTNPLDGIDSQDEGEDAER	1	0.430546	0.786776	-0.279811	0.537591	0.625037	-1.65338	-0.51731	0.0719686	-0.421827	-0.327681	0.163365	0.584724
YOR206W	Noc2	S(149)	YLEENDKDLLDFAGTNPLDGIDsQDEGEDAER	1	0.297566	0.406513	0.426025	0.178376	0.553526	0.514312	-1.05836	-0.825445	-0.399787	-0.491245	0.181027	0.217489
YOR206W	Noc2	T(73)	DMSVEtFFEK	1	-0.20874	0.336891	-0.595684	-0.969309	-0.691003	-0.861018	1.31986	1.91189	0.0966653	-1.13522	0.0789006	0.716761
YOR216C	Rud3	S(64)	MSTDPEADGIVASPDDEGKDLsEGVDK	1	-0.152364	-0.342586	-1.02775	-0.942977	0.248177	0.46998	0.494071	0.326571	0.552402	0.798281	-0.114539	-0.309269
YOR219C	Ste13	S(13)	KNsHLFPQR	1	-0.699802	-0.867793	-0.144059	0.0945752	-0.0354447	0.101078	-0.321632	-0.146083	0.751331	0.593358	0.449607	0.224865
YOR220W	Rcn2	S(201);S(204)	SSQTsLPsQLENK	2	-0.25903	-0.0233776	-0.215653	-0.0505276	-0.462958	-0.118256	0.344621	0.384039	0.920925	0.559367	-0.327905	-0.751246
YOR220W	Rcn2	S(187);S(188)	SSssTSNLSLNR	2	0.00681746	0.118683	0.124465	0.0601604	-0.165434	-9.33536e-06	0.422978	0.275633	0.364264	0.21159	-0.75309	-0.666057
YOR227W	Her1	S(61)	TIAsPQR	1	-0.140576	0.0539984	0.44804	0.403072	0.179735	0.42902	-0.461153	-0.830176	0.16165	0.170784	-0.187695	-0.226699
YOR227W	Her1	S(157)	SSsISTSLNER	1	-0.456008	-0.920895	-0.217891	-0.0347177	-0.269833	-0.343208	-0.415881	-0.433901	0.491856	0.492382	0.867756	1.24034
YOR227W	Her1	S(277)	EQDsPHSESPDLPPILEK	1	0.259273	0.17242	-0.246397	-0.014735	0.0508083	-0.0423699	-0.318801	-0.390784	-0.0440533	0.215942	0.299169	0.0595265
YOR227W	Her1	S(277);S(280);S(282)	EQDsPHsEsPDLPPILEK	3	0.506398	0.265695	0.012975	0.0762439	-0.0405136	-0.249702	-0.26808	0.0164814	-0.0943391	-0.0549343	-0.11644	-0.0537844
YOR227W	Her1	S(1207);S(1211)	SPSNDsLQEsQQK	2	0.690193	0.615825	-0.267956	-0.456329	-0.655124	-0.708784	-0.395969	-0.428103	0.570163	0.689328	0.058693	0.288063
YOR229W	Wtm2	Y(115)	SAATPNPEyGDAFQDVEGKPLRPK	1	0.340032	0.628717	-0.277162	-0.734959	-0.742191	-0.747907	0.00539943	-0.127098	0.0657809	0.242232	0.608141	0.739014
YOR239W	Abp140	T(312)	GDNtGDQNAVEKSDFEK	1	-0.364012	-0.459837	-0.411223	0.00305088	0.426153	0.493821	-0.661828	-0.826705	0.351218	0.145616	0.659692	0.644055
YOR239W	Abp140	T(70)	tAEKPLETNLPKPETNKEDEEEGSMSENK	1	-0.841151	-0.977496	-1.12853	-0.733881	-0.662301	-0.223346	1.37183	0.677297	0.975471	0.931237	0.284681	0.326189
YOR260W	Gcd1	S(296)	LGPQSMsR	1	-0.419013	-0.810123	0.0590745	-0.65625	0.0545135	0.231791	0.299988	0.728406	0.238673	0.364587	-0.233236	0.141589
YOR260W	Gcd1	S(300)	QAsFKDPFTGNQQQQNPPTPDDDEDR	1	-0.125043	-0.21786	-0.0641439	0.140772	0.121346	0.475446	0.164317	-0.00400715	0.469474	0.141856	-0.565949	-0.536207
YOR261C	Rpn8	T(325)	VSDDSESGDKEAtAPLIQQK	1	-0.24462	-0.320509	-0.158889	-0.88686	-0.0794239	-0.606511	-0.0857263	1.48426	0.304607	-0.540616	0.264052	0.870238
YOR267C	Hrk1	S(598)	ANSDCNDKTDCNANNDCsNESDCNAK	1	-0.721967	-0.752725	-0.500924	-1.12501	-0.677013	-0.136009	1.30864	1.13633	0.773978	1.13717	-0.182714	-0.259758
YOR267C	Hrk1	S(122)	QTHsMAELK	1	-1.03634	-0.811371	0.196637	-0.0647992	0.294531	0.245731	-0.363916	0.0728866	0.938861	0.429071	-0.0297775	0.128482
YOR267C	Hrk1	S(47)	KQsNDSLR	1	0.548164	0.696546	1.10935	0.936991	0.742687	1.3254	-1.07515	-1.38269	-0.434814	-0.900629	-0.89023	-0.675617
YOR267C	Hrk1	S(50)	KQSNDsLR	1	-0.0343855	0.604183	0.319584	1.13502	0.304579	1.26002	-0.129333	-1.16967	-0.292613	-0.936128	-0.167832	-0.893421
YOR276W	Caf20	T(116)	KKGSGEDDEEETETTPTSTVPVATIAQEtLK	1	1.03933	0.359877	-1.35178	-1.15733	-0.0991958	-0.23901	1.36723	0.991871	-0.601073	0.0659278	-0.354513	-0.0213309
YOR276W	Caf20	T(99);T(101)	KKGSGEDDEEEtEtTPTSTVPVATIAQETLK	2	0.77404	1.18602	-1.49043	-1.51823	0.0563367	-1.39114	1.57562	2.18317	-1.65106	-1.84003	0.735496	1.38021
YOR276W	Caf20	T(83)	VTTDSDGWCtFEAK	1	-0.520428	0.790352	-0.358483	-1.72456	0.46035	-0.998629	0.112751	1.32808	-0.438206	-1.28818	0.744016	1.89294
YOR279C	Rfm1	T(231)	LGSEEDEEGDGHDGDEGEtK	1	-0.143206	-0.204747	0.221117	0.100543	0.0480782	0.20658	-0.162755	-0.16539	0.149526	0.299165	-0.112761	-0.23615
YOR281C	Plp2	T(37)	APSPtAK	1	-0.104792	-0.0295297	0.572184	0.343134	0.182424	0.403069	-0.357128	-0.0771778	0.045299	-0.244935	-0.337987	-0.39456
YOR287C	Rrp36	S(26)	NLKPDLNSDVEEDDGNLLEsIMANK	1	0.365477	0.391296	0.204215	-0.0474738	0.311893	-0.963301	0.0826726	0.353066	-1.24124	-0.802802	0.276987	1.06921
YOR290C	Snf2	T(1414)	SEAIDGNGEIKGENIDtDNDGPR	1	-0.730277	-0.748336	-0.481766	-0.490726	-0.246803	0.130332	0.578059	0.354471	0.34473	0.35404	0.536056	0.400219
YOR290C	Snf2	S(1378)	QFEVsDDEKNDK	1	0.179646	0.00128322	0.252153	0.02238	-0.019487	0.147468	-0.203901	-0.0997769	0.107762	0.156418	-0.316173	-0.227773
YOR291W	Ypk9	S(1117)	LGNNsVESLR	1	0.0361701	-0.068333	-0.089272	0.244394	-0.0545068	-0.0471966	0.0236379	0.0142428	0.118346	0.0921656	-0.0343747	-0.235273
YOR304W	Isw2	S(831)	NEGsDAEEEEEGEYK	1	-0.324252	-0.126201	0.40222	-0.0734713	0.0759287	0.415231	-0.260448	-0.464968	0.349362	0.323863	-0.242811	-0.0744538
YOR304W	Isw2	S(21);S(30)	NSKSESPsEVLVDTPDsK	2	0.814891	1.06222	-0.101247	-0.168162	-0.385448	-0.644493	-0.307666	-0.212915	0.444141	0.277728	-0.464671	-0.314376
YOR304W	Isw2	T(1080);S(1083)	TSATREDtPLsQNESTR	2	-0.0117764	0.0272006	-0.210113	0.444133	0.0966994	0.0846215	0.31356	-0.176128	0.126356	0.107674	-0.314726	-0.487501
YOR304W	Isw2	T(1080)	TSATREDtPLSQNESTR	1	0.312544	0.352814	0.254736	0.35582	0.0365929	0.264672	-0.339551	-0.864512	-0.041234	-0.00616525	-0.223088	-0.102629
YOR308C	Snu66	S(262)	VNFDsANNMSDEDGGDFKPLK	1	0.449797	0.646859	-0.0134179	0.0255026	0.284726	-0.16757	0.126262	0.182292	-0.754453	-0.780217	-0.0929139	0.0931336
YOR310C	Nop58	S(470)	KRDDDEDSKDsK	1	-1.26319	-1.03811	-0.161203	0.0288946	-0.255237	-0.186932	0.675114	1.47065	1.0491	0.722039	-0.0445887	-0.996539
YOR324C	Frt1	S(228)	RSsAGSFDYER	1	-0.333926	-0.262156	0.301845	0.653313	0.257012	0.328578	-0.280408	-0.787128	-0.0162006	-0.0257732	0.0716787	0.0931667
YOR324C	Frt1	S(228);S(231)	RSsAGsFDYER	2	-0.458528	-0.476856	-0.355252	0.298153	0.197247	0.491967	-0.0639605	-0.621525	0.252427	-0.000560002	0.428067	0.30882
YOR329C	Scd5	S(79)	NNHSNTAADNATNVsSPQKDNPPNGEVR	1	0.380821	0.101088	0.0780629	0.326956	0.625062	0.532272	-0.511842	-0.44449	-0.389578	-0.142334	-0.182526	-0.373492
YOR329C	Scd5	S(564)	IEPSNIsPQHTYSNNVR	1	0.298778	0.690339	-0.111564	0.22555	0.0534903	-0.341008	-0.229815	0.0159405	-0.0205602	-1.01771	0.00967074	0.42689
YOR329C	Scd5	S(57)	SHsDTTLSYR	1	-0.224082	-0.264913	0.304074	0.309833	-0.0905093	-0.0332528	0.1252	0.295918	0.154248	0.0623272	-0.268931	-0.369913
YOR335C	Ala1	S(888)	SIYLLAGNDsEGR	1	-0.735253	-0.158238	-0.368012	-0.467363	-0.628554	-0.0960903	1.98338	1.93579	0.218289	-0.617031	-0.469849	-0.597068
YOR340C	Rpa43	S(285)	IVFDDEVsIENK	1	-0.255242	-0.588642	-0.489549	-0.330917	-0.0931919	-0.215187	0.609585	0.63162	0.177537	0.515058	0.050861	-0.011932
YOR340C	Rpa43	S(262)	VVSVDGTLISDADEEGNGYNsSR	1	-0.369945	-0.164152	-0.0731195	-0.535754	0.474166	0.431633	-0.18882	0.315178	-0.025095	-0.197466	0.182814	0.150561
YOR341W	Rpa190	S(287)	KLDGsNEASANDEESFDVGR	1	-0.310364	-0.66583	0.120776	0.149608	-0.132392	0.106604	-0.151584	-0.0050921	0.407181	0.592417	0.066383	-0.177707
YOR352W	Tfb6	Y(69)	RyHTPEFNDVYNETNNTINDVTMVDDVDDFQPR	1	0.275505	0.185054	-0.368473	-0.14532	-0.344599	-0.0188573	0.126296	-0.0551537	0.0124472	0.11497	0.298824	-0.0806938
YOR352W	Tfb6	T(84)	RYHTPEFNDVYNETNNtINDVTMVDDVDDFQPR	1	0.060836	-0.397344	-0.202665	0.311687	-0.207211	0.45961	0.00326634	-0.29564	0.149934	0.10058	0.19584	-0.178894
YOR358W	Hap5	S(60)	QYSEQQQLQENEGEGENTRLPVsEEEFR	1	0.30438	0.552212	0.091574	-0.127758	0.144859	0.336288	-0.199221	-0.403713	-0.206503	-0.234868	-0.135088	-0.122161
YOR361C	Prt1	S(61)	LEDIPVDDIDFsDLEEQYK	1	-1.02243	-0.733944	0.69443	-0.462632	0.303589	0.807065	-0.679111	-0.00563829	0.901634	0.569792	-0.198117	-0.174643
YOR367W	Scp1	S(11)	ADVTsLDEDLR	1	-0.0851615	-0.119419	-0.0601187	-0.368983	-0.12841	-0.237392	0.199487	0.419817	-0.0600293	0.0922653	0.134232	0.213711
YOR368W	Rad17	S(383)	NREsEDEENHCK	1	-0.437332	-0.0181421	0.943903	0.98316	0.495875	1.23536	-0.650403	-1.12698	0.0620565	-0.452249	-0.414099	-0.621152
YOR370C	Mrs6	S(470)	LGQsFK	1	0.0766949	-0.624376	-0.560636	-0.472136	-0.565092	-0.326096	-0.412745	-0.0491989	0.310426	0.731234	1.15135	0.740573
YOR370C	Mrs6	S(464)	ESSSGLENDEEIVQLTGNGHTIVNsVK	1	0.217917	0.226762	-0.406315	-0.921635	-0.638909	-0.735642	0.078258	0.915197	-0.150835	-0.717153	0.899885	1.23247
YOR370C	Mrs6	S(9)	RPsMAER	1	-0.957052	-1.24534	-0.200729	0.115332	-0.0697174	-0.067017	0.242172	0.161183	0.343969	0.578931	0.641357	0.456911
YOR371C	Gpb1	S(150)	sKDDIYDFEDNTDDECNAK	1	0.115929	-0.115148	0.167607	0.227068	-0.567757	-0.121721	-0.0779121	-0.195983	0.637098	0.616494	-0.274965	-0.41071
YOR374W	Ald4	S(96)	AFsNGSWNGIDPIDR	1	2.2305	1.88525	-0.643986	-0.571138	-0.660635	-0.792084	-0.371181	-0.107594	-0.056289	0.464999	-0.498412	-0.879433
YOR374W	Ald4	Y(507)	EMSVDALQNyLQVK	1	2.68863	3.53719	-0.837979	-0.82266	-0.67357	-1.7928	-0.458316	-0.0466525	-1.0286	-1.56111	0.309834	0.686033
YOR375C	Gdh1	Y(73)	GPyKGGLR	1	-0.17911	-0.101408	0.668835	1.5723	0.344389	1.01647	-0.0399995	-0.864502	-0.319305	-0.941942	-0.474809	-0.680918
YPL004C	Lsp1	Y(241)	ALLELLDDSPVTPGEARPAyDGYEASR	1	0.813279	0.593984	-0.739424	-1.55751	-0.679049	-0.676007	1.13955	1.15586	0.0879615	0.950895	-0.622315	-0.467227
YPL011C	Taf3	S(346)	RTsLDYGGYF	1	-0.344018	-0.347883	-0.0696823	0.109221	0.211642	0.0795664	-0.159622	-0.0959872	0.120814	0.044503	0.240866	0.210581
YPL015C	Hst2	S(346)	LNDHDsDEDGASNSSSSQK	1	0.681797	0.65802	0.590924	0.873639	0.402621	0.630414	-0.736186	-1.0756	-0.39271	-0.572799	-0.546446	-0.513676
YPL016W	Swi1	S(837)	VNNNGTLTPNDsNDEK	1	-0.355584	-0.215391	0.110559	-0.302335	-0.387311	-0.181058	0.344643	0.375822	0.861297	0.925901	-0.573604	-0.602938
YPL019C	Vtc3	S(621);S(622)	HIIADLEDHEssDEEGTALPK	2	-0.198721	-0.314333	-0.100439	0.0132641	0.349008	0.371918	-0.133333	-0.122531	0.137513	0.370705	-0.054029	-0.319023
YPL019C	Vtc3	S(592)	IsVPDGK	1	-0.510218	-0.540569	0.490397	0.405598	1.03818	1.1107	-0.996297	-1.18625	0.158932	0.0884933	-0.180997	0.122028
YPL019C	Vtc3	S(589);S(592)	RLsKIsVPDGK	2	-0.845849	-1.00934	-0.712183	-0.613343	0.471449	0.119918	-0.843422	-0.792258	0.686111	0.790909	1.24389	1.50411
YPL020C	Ulp1	S(127)	NFDGSEVEASGNsDVESR	1	0.108273	0.28616	0.40494	0.350879	0.285745	0.509852	-0.537083	-0.908683	-0.116887	-0.154096	-0.144988	-0.084112
YPL022W	Rad1	S(613)	KGsGDDLDDGQEENAANDSK	1	-0.197453	-0.327661	0.322126	0.280533	0.0693983	0.333283	-0.228475	-0.630155	0.0803556	0.111975	-0.0459523	0.232025
YPL023C	Met12	S(359);S(362)	RHSsLDsAK	2	0.209225	0.224583	0.644049	0.705605	0.0799143	0.375816	-0.723461	-0.782323	0.254968	0.277819	-0.464695	-0.8015
YPL032C	Svl3	S(555)	KPsFPQLQQSANVR	1	-0.0905048	0.382451	0.0447168	-0.544409	0.188113	-0.793133	0.104378	0.960551	-0.222813	-0.830484	-0.0238902	0.825024
YPL032C	Svl3	T(456)	ATGtPNLR	1	0.5444	0.487991	0.0848863	0.37836	0.627305	0.118909	-0.114403	0.120889	-0.731744	-0.602364	-0.410445	-0.503785
YPL032C	Svl3	S(660)	NSNMPNIGNPSSINMSDFGRPPNNSsQTR	1	-0.15551	0.371091	-0.366045	-0.513712	0.481469	-0.49073	0.579949	0.679368	-0.142426	-0.478718	-0.397437	0.432702
YPL037C	Egd1	T(151)	APADAEKKDEAIPELVEGQtFDADVE	1	-0.186733	-0.0247338	-0.236961	-0.269231	-0.193772	-0.374112	1.06351	0.825333	-0.0455522	0.438159	-0.40049	-0.595416
YPL043W	Nop4	S(247)	AQPEMNDKDDNEsGNEDAEENHDDEEDENEEEDR	1	-0.413629	-0.467014	0.481667	0.367826	0.202959	0.598026	-0.00411558	0.117801	0.0403076	0.0575641	-0.307189	-0.674203
YPL043W	Nop4	S(274)	AQPEMNDKDDNESGNEDAEENHDDEEDENEEEDRQVDQAsK	1	-0.0413854	0.399065	0.112726	-0.267402	0.283657	-0.411642	0.237873	0.964848	-0.40659	-1.05779	-0.186281	0.372921
YPL049C	Dig1	T(304)	NSNVGSSANASPtQQR	1	0.707736	1.22775	0.954105	0.342337	0.226179	0.371632	-0.874669	-1.40098	-0.416823	-0.566618	-0.596528	0.0258805
YPL049C	Dig1	S(339)	STsTSTSTSTSTSTNR	1	-0.938129	-0.485273	-0.508393	-0.686646	0.505138	-0.576597	-0.482846	0.0469247	-0.0309343	-0.51255	1.45516	2.21414
YPL049C	Dig1	S(298);S(302)	NSNVGSsANAsPTQQR	2	0.0479906	0.120668	-0.296041	-0.382046	-0.0780105	0.0341012	-0.419948	-0.997425	0.286661	0.396749	0.459348	0.827953
YPL049C	Dig1	S(397)	TSQPQQQsPSLLQGEIR	1	0.296131	0.557074	0.0372281	-0.0258882	-0.0696072	0.00917925	-0.370628	-0.633002	-0.0654277	0.0347536	0.172304	0.0578835
YPL054W	Lee1	T(274)	tGPAIQEESDNEIEDLLIHNFNSR	1	0.966953	1.20696	-0.237757	-0.136842	-0.402198	-1.05786	0.660846	0.948554	-0.624819	-0.899799	-0.363026	-0.0610163
YPL054W	Lee1	S(21)	RNsQSANEMLAPQIQDFQNIPR	1	0.443845	0.445702	-0.526347	-0.0805593	-0.265219	-0.404229	0.923458	0.494746	-0.0709494	-0.419667	-0.504788	-0.0359922
YPL057C	Sur1	T(351)	KDSNtNIVLLK	1	-0.0778479	0.306794	0.102751	0.000163691	0.672306	0.318292	-0.519344	-0.384586	-0.558113	-0.73815	0.380249	0.497485
YPL070W	Muk1	S(538)	DTTEMsR	1	-0.769316	-0.924079	0.0981099	0.173561	-0.138824	0.207153	0.107886	0.100475	0.565942	0.39686	0.136203	0.0460293
YPL070W	Muk1	T(71)	LENNKSPILtK	1	0.299121	0.121796	0.209112	-0.299792	-0.812131	-0.782363	-0.142369	-0.0210194	0.321407	0.608739	0.12486	0.37264
YPL070W	Muk1	S(523);S(526)	SSsQLsMELSNR	2	-0.360461	-0.700386	-0.55575	-0.281587	-0.0663574	-0.103553	-0.49382	-0.696862	0.135061	0.357806	1.34133	1.42458
YPL070W	Muk1	S(475)	SNsYDGFR	1	-0.290802	-0.194714	0.122795	0.183436	0.16896	0.242421	-0.106512	-0.241746	-0.0174188	-0.0602826	0.122978	0.0708861
YPL074W	Yta6	S(422)	sGTPDKESSASSSLDSR	1	0.222008	0.548388	0.966982	1.05793	0.500802	0.811418	-0.573589	-1.24186	-0.641921	-0.750948	-0.474283	-0.424931
YPL075W	Gcr1	S(590)	LPNNDSTTSMPEsPTEVAGDDVDR	1	-0.0549222	0.213574	0.682472	0.525688	0.216798	0.515388	-0.981307	-1.13129	0.371701	0.0781554	-0.234742	-0.201513
YPL075W	Gcr1	S(619)	SEPNDNSPEsKDPEK	1	-0.306022	-0.179557	0.0623755	-0.0307365	0.0396525	0.247754	-0.380635	-0.50506	0.332473	0.134957	0.252155	0.332642
YPL077C	Ypl077C	S(95)	RNsVDIPLQTHNR	1	-0.609425	-0.163318	0.205339	0.24693	0.109317	0.266748	-0.376339	-0.432072	0.358959	-0.0448046	0.31215	0.126517
YPL081W	Rps9A	S(162)	HIDFAPTsPFGGARPGR	1	-0.103775	-0.175176	0.0145955	-0.0198148	0.0416691	-0.426921	-0.239371	0.0132914	-0.356238	0.0443641	0.64312	0.564256
YPL081W	Rps9A	S(184)	KAEAsGEAADEADEADEE	1	-0.609684	-0.759805	0.0354236	0.159514	0.346797	0.494017	-0.330436	-0.33418	0.0674337	0.254649	0.490467	0.185805
YPL085W	Sec16	S(1515)	IGDSLQGsPQR	1	0.285014	0.140545	0.202433	0.144107	0.467353	0.435612	-0.471671	-0.275363	-0.339616	-0.14846	-0.143514	-0.296441
YPL085W	Sec16	S(678);S(681)	KGsNNsNRPPVIPLGTQGPR	2	-0.391576	-0.343104	-0.514396	-0.217431	-0.0564456	-0.394701	-0.401192	-0.660644	0.18341	0.0214771	1.1802	1.5944
YPL085W	Sec16	S(1611);T(1615)	REsIIStGSEFLPPPK	2	-0.12842	0.185445	-0.332554	0.0563196	-0.183652	-1.00929	-0.234805	-0.0887415	-0.141024	0.108439	1.02045	0.747824
YPL085W	Sec16	S(678)	KGsNNSNRPPVIPLGTQGPR	1	0.109414	0.591536	-0.200287	-0.336047	0.260573	-0.529077	-0.759612	-0.527112	0.2981	-0.214103	0.291812	1.0148
YPL085W	Sec16	T(159)	NPSLDVVAGELHNNNEHtQK	1	0.356763	0.378713	-0.364266	-0.145856	-0.29634	-0.28888	-0.0581808	-0.133706	-0.0202869	-0.139573	0.38231	0.329302
YPL085W	Sec16	S(1633)	ANsSQGSLMYSPSVEALPIDPVVPQVHETGYNDFGNK	1	-0.102504	0.516632	-0.371564	-0.110394	0.4419	-0.914285	-0.0426566	0.85977	-0.341059	-1.10708	0.415884	0.755354
YPL085W	Sec16	Y(777)	HATQyGLNNGVPPVSPYGQATINLPTANK	1	-0.769603	0.308231	-0.53915	-0.188051	0.593738	-0.987692	0.0246306	0.484143	-0.0354639	-0.618494	0.725848	1.00186
YPL085W	Sec16	S(44)	AASHSEEPLELPESTINSsFNDDSVNR	1	-0.119967	0.148502	-0.110144	0.347132	-0.227038	0.103559	0.274983	-0.593533	0.340428	0.169123	-0.158263	-0.174784
YPL085W	Sec16	Y(1965)	KASTNQyR	1	-0.31351	-0.375152	-0.583248	-0.0749316	-0.0113231	-0.288284	-0.314703	-0.336554	0.426015	0.338572	0.79677	0.736349
YPL085W	Sec16	S(1602);S(1603)	LGTVPSNYVssPDLVR	2	-0.113046	0.112475	-0.165038	-0.771146	-0.126792	-0.610103	0.0658017	0.295919	0.103862	0.622894	0.235212	0.349962
YPL085W	Sec16	S(313)	NSGDDTSMLFQDDEsDQKVPWEEDVKK	1	-0.244476	-0.139374	-0.329164	-0.807004	-0.49886	-0.295871	0.0371567	0.250972	0.475297	0.211553	0.560046	0.779725
YPL085W	Sec16	S(360)	SEsCTAADER	1	-0.439096	-0.71664	-0.532856	0.0162789	-0.424596	-0.233594	0.768047	0.416757	0.192272	0.338663	0.43623	0.178536
YPL085W	Sec16	T(1539)	VRtDQHTNEK	1	-0.915519	-1.00693	-0.630672	-0.0913529	-0.74766	-0.598531	1.28307	0.962877	0.71493	0.539748	0.295853	0.194192
YPL105C	Syh1	S(332)	VPSHEEDsPEEQEVFSEEGR	1	-0.19885	-0.258531	0.193068	0.314014	0.0877683	0.157904	-0.0182164	-0.291444	0.0525338	0.0553646	-0.116303	0.0226923
YPL105C	Syh1	S(340)	VPSHEEDSPEEQEVFsEEGR	1	-0.568116	-0.165101	0.183091	0.404699	-0.0872538	0.577292	-0.0592236	-0.592906	0.338477	-0.042889	0.193025	-0.181096
YPL105C	Syh1	S(332);S(340)	VPSHEEDsPEEQEVFsEEGR	2	-0.180297	0.104771	0.0677217	0.981092	0.242136	0.491507	-0.146957	-0.840118	0.0762103	-0.3701	-0.0588145	-0.367152
YPL112C	Pex25	S(302);S(304)	DDGsQsPIRK	2	-0.550723	-0.207639	-0.295624	0.244499	-0.389551	-0.147741	0.250431	-0.112131	0.822485	0.406143	0.162982	-0.183132
YPL112C	Pex25	S(302)	DDGsQSPIRK	1	-0.389356	-0.201347	0.631788	0.498258	0.437797	0.426482	-0.216998	-0.248241	-0.00517158	-0.154408	-0.458059	-0.320743
YPL115C	Bem3	S(227)	GsKSPLQER	1	-0.421138	-0.670046	0.62281	0.684459	0.558937	0.752165	-0.578345	-0.792539	-0.0391737	0.165998	-0.143091	-0.140037
YPL116W	Hos3	S(530)	sNASPEKELHENKPR	1	-0.179637	-0.406217	0.0765298	0.00726639	-0.076168	0.0902002	0.29577	0.499744	0.216578	0.324827	-0.333072	-0.515821
YPL118W	Mrp51	S(327)	RPsVGNIQEANNLLNIIK	1	-0.429648	0.624879	0.626725	0.591618	0.627481	-0.752706	-0.374081	-0.352053	0.201667	-0.251385	-0.652144	0.139647
YPL120W	Vps30	S(154)	DHDEEEQEATDEDENQQIQLNsK	1	0.396778	1.21919	-0.204102	-0.489343	-0.0457618	-1.30878	-0.139024	0.804547	-0.207825	-0.949766	0.199935	0.724149
YPL127C	Hho1	S(130)	EKEVsPKPK	1	0.36478	0.132863	0.483835	0.383203	-0.195532	-0.0468672	-0.124187	-0.102485	0.0953409	0.430617	-0.624237	-0.797331
YPL131W	Rpl5	S(235)	GYLADDIDADsLEDIYTSAHEAIR	1	0.384151	1.0937	-0.199432	-1.28032	-0.275562	-0.772591	0.884264	1.21382	-1.00605	-1.25171	0.212623	0.997111
YPL131W	Rpl5	S(242)	GYLADDIDADSLEDIYTsAHEAIR	1	0.228199	0.0743212	-0.197494	-0.235581	0.0146069	-0.45473	-0.0668475	0.205818	-0.112612	0.197427	0.134148	0.212744
YPL137C	Gip3	T(99);S(103)	RNDGNTSASDTDNIPLLtPINsGNR	2	-0.355399	0.549867	-0.147139	-0.955318	0.119991	-0.241486	0.200953	0.225838	-0.0135891	-0.174644	0.195183	0.595743
YPL145C	Kes1	T(383)	DFDYSVTPEEGALVPEKDDtFLK	1	0.496484	0.630218	0.295273	0.131681	0.304314	0.266566	-0.38732	-0.507386	-0.561212	-0.570527	-0.14754	0.0494483
YPL150W	Ypl150W	S(869)	SLsEGSNWSSSYLDSDNNR	1	-0.0778817	0.0612449	0.187423	0.296835	0.150472	0.117006	-0.129533	-0.0485117	0.129634	-0.350552	-0.260114	-0.0760226
YPL157W	Tgs1	S(278);S(279);S(285)	EssEKEELsSENEELSKR	3	-0.479528	-0.603115	-0.30619	-0.00504072	0.0918613	-0.0367721	0.0565254	0.17646	0.512109	0.539736	0.125222	-0.0712677
YPL180W	Tco89	S(74)	CKSsDALFR	1	0.180294	0.245512	0.115532	0.103763	0.235405	0.345277	-0.275662	-0.69252	-0.0966065	0.070875	-0.158963	-0.0729071
YPL190C	Nab3	T(178)	REtLEK	1	-1.07684	-0.915422	-0.339068	-0.150683	-1.00383	-0.346245	1.94567	1.36258	1.24131	1.22978	-0.76724	-1.18001
YPL190C	Nab3	T(86)	EAEREEENEEQHELEDVNDEEEEDKEEKGEENGEVINtEEEEEEEEEHQQK	1	-0.688319	-0.586981	0.116618	-0.130494	0.026669	0.300184	-0.376608	-0.123272	0.673137	0.483334	0.248502	0.0572295
YPL191C	Ypl191C	S(343)	RSsLLNAK	1	-0.601345	-0.763049	-0.533146	-0.293237	-0.230393	-0.194531	-0.0488518	-0.164536	0.864531	0.909037	0.549205	0.506316
YPL193W	Rsa1	S(182)	DQAsAEPTEIPR	1	0.170796	0.339586	-0.080729	-0.284826	-0.0586555	-0.0609953	0.0240385	0.036572	0.0884742	0.19067	-0.143924	-0.221007
YPL193W	Rsa1	S(220)	KDPELANSNAEDDHNNLGLEDDDRDEQLEsEGLGK	1	0.143676	0.0338251	-1.80488	0.067615	0.908306	0.173737	0.097673	-0.318077	0.104494	-0.00887442	0.550727	0.051774
YPL195W	Apl5	S(918)	AKNsPEPNEFLR	1	0.24549	-0.0205822	0.320115	0.24687	-0.184186	0.0735751	-0.354713	-0.280284	0.158433	0.161264	-0.185139	-0.180843
YPL201C	Yig1	T(56)	EHIDQLtFSNVGQDGGDVGNYSEEDDDGDEEKELEDVFR	1	0.670758	1.4982	-0.00503392	0.0232433	0.22328	-0.605301	-0.263481	-0.0148621	-0.336493	-0.591506	-0.289031	-0.309774
YPL217C	Bms1	S(578)	GEDDDSKDEsDIEEDVDDDFFR	1	-0.379036	-0.304337	0.424672	-0.102961	0.3359	0.389874	-0.265155	0.061261	0.135046	0.0853536	-0.251427	-0.12919
YPL217C	Bms1	S(574)	WRGEDDDsKDESDIEEDVDDDFFR	1	-0.185444	-0.234051	0.303153	-0.372939	0.347304	0.485139	-0.124713	0.274179	-0.248151	0.0739395	-0.0921492	-0.226268
YPL219W	Pcl8	S(32)	SMSEFYDDDDDNDsDMCR	1	0.105478	0.128751	-0.247237	-0.335762	-0.0422672	0.00458008	-0.0435863	-0.0278079	-0.00608563	-0.315519	0.233698	0.545758
YPL221W	Flc1	S(714);S(717)	ITQQEVSPDRASSsPNsK	2	1.11006	1.68881	0.960682	1.06132	0.501716	0.230599	-1.03714	-1.41283	-0.788036	-0.95477	-0.747282	-0.613133
YPL221W	Flc1	S(707)	ITQQEVsPDR	1	0.0820656	0.475488	0.972669	1.05283	0.726878	0.744499	-0.668359	-0.810884	-0.457251	-0.77777	-0.656002	-0.68416
YPL226W	New1	T(1191)	GTPKPVDtDDEED	1	-0.234059	-0.473746	0.32649	0.471237	0.310922	0.531829	-0.0263464	-0.100746	0.0489654	0.109591	-0.425972	-0.538165
YPL228W	Cet1	S(15)	ALsLDDLVNHDENEK	1	-0.286822	-0.0202751	-0.511742	-0.620158	-0.0135731	-0.199327	-0.106345	-0.0661039	0.51807	0.479667	0.400412	0.426197
YPL228W	Cet1	S(131)	NLLSNGSPPMNDGsDANAK	1	0.104908	0.23964	-0.235088	-0.691205	-0.147562	-0.109222	-0.220867	-0.384339	0.256832	0.402917	0.241778	0.54221
YPL237W	Sui3	S(112)	AGLDNVDAEsK	1	-0.56987	-0.271695	0.0937208	-0.443314	-0.545207	-0.23469	0.245709	0.663302	1.20576	0.7083	-0.430116	-0.421903
YPL237W	Sui3	S(40)	ENGsGDDLFAGLK	1	0.0403695	0.365887	-0.465796	-0.81501	-0.0116795	-0.419986	0.857923	1.10202	-0.361229	-0.718962	-0.0595882	0.486051
YPL242C	Iqg1	S(16)	TAYSGSPSKPGNNNsYLNR	1	-0.0864875	-0.0259674	0.0782829	-0.00472444	0.142359	0.355407	0.495322	0.597734	-0.0955584	-0.0613639	-0.533918	-0.861085
YPL247C	Ypl247C	S(61)	GPSPFGMSGNTTNGGNsK	1	0.00668053	0.108718	-0.225418	-0.327192	-0.789195	-0.89801	0.376684	0.794698	0.73231	0.425408	-0.101062	-0.103621
YPL249C	Gyp5	S(87)	EEPIGIsGDEDTQITEQNVNEQR	1	0.475334	1.27126	-0.195927	-0.228724	-0.133081	-1.12635	0.0807317	0.879757	-0.648654	-1.81628	0.421596	1.02033
YPL249C	Gyp5	S(159)	DVVsSPENR	1	-0.141251	-0.358099	0.156798	0.873037	0.130189	0.285054	0.142265	0.103485	-0.175634	-0.493709	-0.112367	-0.409767
YPL249C	Gyp5	S(284)	GNNSSENEVSAIPTTSsPPLPPR	1	0.309042	0.2843	0.0133419	0.0930424	0.0119608	-0.0976332	-0.340105	-0.331063	0.121684	0.213001	-0.115923	-0.161647
YPL249C	Gyp5	S(66)	QQsLGHEENEAPTNVSR	1	-0.138669	-0.30209	0.00623913	0.898867	0.228892	0.303765	-0.0174138	-0.188561	0.129707	-0.177441	-0.208755	-0.53454
YPL265W	Dip5	T(10)	MFtSTSPR	1	1.32021	1.96858	0.157564	-0.0774571	-0.149404	-0.00764193	-1.12242	-1.34736	0.435945	0.477072	-0.6419	-1.01319
YPR008W	Haa1	S(271)	RIsPISNSR	1	0.151206	-0.262076	0.0410517	0.500165	-0.374605	-0.0366143	0.206904	-0.071099	0.287724	0.368328	-0.312281	-0.498703
YPR018W	Rlf2	S(98)	NSPIQsTK	1	-0.0661117	0.0760087	0.633155	0.418584	0.519327	0.597	-0.308134	-0.430316	-0.284667	-0.158332	-0.49357	-0.502944
YPR018W	Rlf2	S(295)	DKTsSDDLLNWLQSR	1	0.436357	0.74544	-0.718634	-1.00859	-0.641637	-0.598765	1.71023	2.13353	-0.890074	-1.54911	0.103757	0.277504
YPR019W	Mcm4	S(69)	AAIGSsPLNFPSSSQR	1	0.434047	0.421501	0.143953	0.261571	-0.0804838	0.0769047	-0.168927	-0.0417141	-0.214772	-0.419672	-0.113818	-0.298591
YPR022C	Sdd4	S(20)	ENDNDLsPNSSSSPAER	1	-0.0573517	-0.122992	0.344495	0.623043	0.177942	0.465533	-0.261702	-0.511812	0.127982	0.0980447	-0.331365	-0.551816
YPR023C	Eaf3	S(159)	STsQSSLTSSVSGR	1	-0.288331	0.0759817	0.582324	0.52669	0.489604	-0.082924	0.310172	1.03861	-0.27366	-1.06025	-0.82011	-0.498104
YPR030W	Csr2	T(110)	GNSFPSDVGtK	1	0.445309	0.273635	0.320237	0.23637	-0.427805	-0.0441181	-0.714009	-0.751823	0.600323	0.555756	-0.224055	-0.26982
YPR030W	Csr2	S(148)	REsDPVAAK	1	0.0463311	-0.111806	0.517668	0.540074	-0.137919	0.250738	-0.78045	-0.758528	0.761831	0.550551	-0.40746	-0.47103
YPR030W	Csr2	S(127)	HRNsVPYTTIDQLHTR	1	-0.186767	-0.205489	0.571748	0.437245	0.429373	0.0135041	-0.324283	-0.54674	-0.166423	0.0661264	-0.323647	0.235354
YPR030W	Csr2	S(963)	VLPPTFEEATSVSAsPR	1	0.774872	0.623456	0.0519426	0.0044123	-0.210235	-0.128276	-0.568035	-0.341276	0.0230537	0.0739165	-0.071599	-0.232234
YPR036W-A	Spo24	S(32)	KNsDANVDDLNLAIANAALLDASASSR	1	1.18115	0.497866	-0.480348	0.663511	-0.604979	-0.757325	0.6335	0.622554	-0.644827	-1.16643	-0.0844989	0.139821
YPR040W	Tip41	T(55)	RMPMPTSGITTPSVQPTAAPAtPPR	1	0.0670435	0.0655007	-0.0749172	0.0410971	0.0180189	-0.0981752	-0.140484	-0.139716	-0.0513089	0.00524938	0.181648	0.126044
YPR040W	Tip41	T(6)	RNtPPLR	1	0.214852	0.297591	0.16855	0.408266	-0.0526818	0.147263	0.0851971	-0.364461	-0.227973	-0.124507	-0.187945	-0.364153
YPR041W	Tif5	S(189);S(190);T(191)	SQNAPSDGTGsstPQHHDEDEDELSR	3	-0.534443	-0.376434	-0.421976	0.28568	-0.179171	-0.0640588	1.22599	0.740642	0.221761	0.0733165	-0.312156	-0.659147
YPR041W	Tif5	S(397)	RAAKPFITWLETAEsDDDEEDDE	1	0.543223	1.00539	-0.369109	-0.519776	-0.215174	-0.953073	0.0599673	0.40505	-0.355596	-0.788248	0.336688	0.850657
YPR041W	Tif5	S(179)	sQNAPSDGTGSSTPQHHDEDEDELSR	1	-0.116067	-0.434732	0.451024	1.44494	0.145805	0.536853	-0.130827	-0.760099	-0.257088	-0.216406	-0.092847	-0.570556
YPR041W	Tif5	T(191)	SQNAPSDGTGSStPQHHDEDEDELSR	1	-0.0771395	-0.084068	0.20766	0.702192	0.10488	0.350363	-0.309797	-0.10469	0.0802677	-0.334103	-0.00586995	-0.529694
YPR041W	Tif5	S(190);T(191)	SQNAPSDGTGSstPQHHDEDEDELSR	2	-0.260834	-0.291272	0.241192	0.830541	0.115852	0.420024	0.219193	0.0370582	0.0238242	-0.2465	-0.339227	-0.749852
YPR041W	Tif5	S(184)	SQNAPsDGTGSSTPQHHDEDEDELSR	1	-0.0903553	-0.018622	0.419572	0.91474	0.12068	0.647802	-0.118606	-0.234497	-0.309319	-0.276183	-0.0219716	-1.03324
YPR042C	Puf2	S(894)	KQHPQGFHsPGR	1	-0.0698756	-0.176093	0.483181	0.728059	0.278388	0.26984	-0.358178	-0.603613	-0.226768	-0.142284	-0.106747	-0.0759089
YPR065W	Rox1	S(270)	FSSSPNsSVLENNR	1	0.712152	1.15254	0.776441	0.852989	0.509286	0.528828	-0.629923	-0.940016	-0.743956	-0.699043	-0.624001	-0.895302
YPR070W	Med1	S(404)	HGsVVEASR	1	-1.25099	-0.98161	-0.626542	0.395997	-0.241392	-0.19052	0.158512	-0.208822	0.915245	0.196483	1.04517	0.788472
YPR072W	Not5	S(318)	KKEsENDSEQQLNFPPDR	1	-0.3229	-0.244961	-0.351407	0.0497041	0.199979	0.130121	-0.184167	-0.471944	0.349269	0.185168	0.309226	0.351912
YPR072W	Not5	S(377)	YLMQPLQEMsPK	1	0.174238	0.766468	-0.227799	-0.253684	-0.00765274	-0.920764	-0.0396961	0.229534	-0.176312	-0.487005	0.277222	0.66545
YPR072W	Not5	S(256)	DVsISDR	1	-0.397187	-0.789193	-0.182005	0.0842032	-0.0763405	0.0529099	0.278541	0.141386	0.116465	0.292957	0.260527	0.217737
YPR074C	Tkl1	S(492)	sLPNIQVWRPADGNEVSAAYK	1	0.937506	1.66515	-0.676721	-1.76858	0.290823	-1.08876	-0.114661	0.294807	-1.32498	-0.775293	0.888036	1.67267
YPR074C	Tkl1	S(344)	RLSGQLPANWEsK	1	-0.0277275	0.125586	0.216975	0.0224037	0.395129	0.312634	-0.334098	-0.299294	-0.270467	-0.123138	0.0201885	-0.0381917
YPR075C	Opy2	S(310)	LVQIAEEESDKEIQDLDVIEEQTEADDLsHMAK	1	0.654093	1.58346	0.136764	0.748423	0.0750707	-1.97987	-0.563662	-0.61004	-0.596044	0.172973	0.293778	0.0850599
YPR079W	Mrl1	S(279)	NDDELHDIsPSLNEQPHWDLIEDGSR	1	0.165331	0.759423	0.150344	-0.151716	0.344181	-0.478734	-0.525932	0.0208028	-0.241674	-0.601446	0.107751	0.45167
YPR083W	Mdm36	S(42)	AGLNDsADEEDTDINGNR	1	0.747834	0.862417	0.524807	0.694019	0.447934	0.661595	-0.753007	-0.967292	-0.450619	-0.673434	-0.516948	-0.577305
YPR089W	Ypr089W	T(824)	TNSNTSGFtGDEDK	1	-0.00347467	0.652661	1.05773	0.883165	0.504952	0.985947	-0.88446	-1.10113	0.162786	-0.441366	-0.837535	-0.979279
YPR089W	Ypr089W	S(814)	QNEPQIsR	1	-0.369367	-0.468325	-0.411266	-0.0932616	-0.280862	-0.258469	0.29496	-0.0841237	0.352521	0.434608	0.414014	0.469571
YPR091C	Nvj2	S(669);S(676)	RPsQPLNTLsPK	2	-0.337039	-0.740769	-0.265243	-0.049306	-0.156277	-0.00581591	-0.409882	-0.247299	0.781264	0.921398	0.387177	0.121792
YPR091C	Nvj2	S(669)	RPsQPLNTLSPK	1	0.457876	0.932697	0.177037	0.447438	-0.00964005	-0.026695	-0.3829	-0.665745	0.113826	-0.0335007	-0.3562	-0.654195
YPR091C	Nvj2	Y(614)	WyKDNVGNSSDTEDMDEIDVQDK	1	1.16301	0.98283	-1.24447	-0.445475	-0.236063	-0.399371	0.375283	-0.0048023	-0.582316	-0.235568	0.524561	0.102387
YPR104C	Fhl1	T(53)	ESITNSPTSEVPIEtK	1	0.17087	0.214032	0.403302	0.235413	0.190157	0.426005	-0.73788	-0.552972	0.221421	0.0714649	-0.247872	-0.393943
YPR104C	Fhl1	S(393)	NDDSKsPENADIAESEINTR	1	-0.240649	-0.214335	0.335912	0.276026	0.267174	0.576377	-0.265633	-0.530346	0.091831	0.112824	-0.188635	-0.220547
YPR105C	Cog4	S(352)	NEDVNIGSNQsDIETDGETEK	1	-0.147682	0.372537	0.426984	0.0809928	0.247834	0.267922	-0.856712	-1.12622	0.037515	-0.357892	0.292062	0.762663
YPR112C	Mrd1	S(264)	DTDIGLVNDDANsDEKENEK	1	-0.664944	-0.653686	-0.184892	-0.357832	0.0169545	0.225652	0.157457	0.363907	0.534084	0.504643	0.141341	-0.0826839
YPR115W	Rgc1	S(966)	RGsDLSPFEMESPLFEENR	1	0.0366375	0.239852	-0.58764	-0.184098	0.119358	-1.15919	-0.211726	0.0269714	0.102048	0.0657876	0.541322	1.01068
YPR124W	Ctr1	S(414)	NNESKVAIsENNQK	1	-0.187035	0.127802	-0.611095	-0.345093	-0.388958	-0.111184	1.01211	0.569086	0.618465	0.415845	-0.443488	-0.656456
YPR124W	Ctr1	T(258)	YStLPSANSKDEGK	1	-0.124133	0.620252	0.193604	0.0650304	-0.163438	0.283318	-0.279379	-0.498229	1.28821	0.717937	-0.914862	-1.18831
YPR124W	Ctr1	S(261)	YSTLPsANSKDEGK	1	-0.0468194	0.971843	0.327039	-0.115788	-0.146804	0.272252	-0.430442	-0.447399	1.11006	0.740524	-0.81303	-1.42143
YPR124W	Ctr1	S(384);S(395)	HPEPsPDPIAVADTTsGSDQSTR	2	0.626572	1.6587	0.13459	0.302888	0.0832617	-0.00682304	-0.192292	-1.07114	-0.28624	-0.867461	-0.365892	-0.0161592
YPR124W	Ctr1	S(384)	HPEPsPDPIAVADTTSGSDQSTR	1	1.46929	0.936397	0.325401	-0.312391	-0.30248	-0.260977	-0.757424	-0.463222	-0.143476	0.0299062	-0.591311	0.0702867
YPR124W	Ctr1	S(395);S(397)	HPEPSPDPIAVADTTsGsDQSTR	2	0.0230898	-0.0795603	0.353398	0.680362	0.518145	0.628352	-0.390921	-0.543423	-0.294151	-0.342571	-0.209561	-0.34316
YPR124W	Ctr1	S(395)	HPEPSPDPIAVADTTsGSDQSTR	1	-0.15434	0.0504141	0.258758	0.478028	0.22093	0.556275	-0.0666535	-0.260143	-0.147571	-0.210036	-0.111124	-0.614538
YPR124W	Ctr1	T(423)	KTPtQEEECNCATDSGKNQANIER	1	0.966479	1.53028	-0.0863221	0.406338	0.35906	0.327775	-0.725765	-1.02937	-0.124129	-0.721089	-0.389322	-0.513932
YPR129W	Scd6	S(165)	STPQDTNVNSQsR	1	-0.632005	-0.923621	-0.104629	-0.160527	-0.114797	-0.187591	0.397406	0.556276	0.685407	1.05711	-0.231382	-0.341652
YPR133C	Spn1	S(118)	DRDSsATPSSR	1	-0.210242	0.150505	-0.227921	-1.23186	-0.557298	-0.708541	0.321565	0.576553	0.656957	0.861629	0.0169404	0.351716
YPR133C	Spn1	S(85)	HIsTDFSDDDLEKEEHNDQSLQPTVENR	1	0.02541	-0.219068	0.0976449	-0.0145789	0.0980516	0.30882	-0.324033	0.232515	0.0561054	-0.172994	0.0468212	-0.134695
YPR135W	Ctf4	S(379)	HGLFVDSEsDLENLEGNDDINK	1	0.204661	0.472748	0.463964	0.0157545	-0.111653	0.046259	-0.195281	-0.133909	0.0388844	-0.170737	-0.400575	-0.230116
YPR148C	Ypr148C	S(335)	DISANTTTSFDETPSTEDEKPKSEGAEEEsKK	1	0.500267	0.796622	-0.308829	-0.0146538	0.395063	-0.394165	0.0159381	-0.0576366	-0.462934	-0.282017	-0.139505	-0.0481503
YPR156C	Tpo3	S(132)	QIDGASSPSSNEDALEsDNNEK	1	0.26082	-0.0902659	-0.493726	-0.327749	-0.315107	-0.247123	0.209868	0.153577	0.114773	0.250601	0.223372	0.26096
YPR160W	Gph1	S(19)	PPASTSTTNDMITEEPTsPHQIPR	1	0.57414	0.409616	0.43915	0.716286	-0.622962	-0.182826	-0.546277	-0.690541	0.175938	-0.101125	-0.0199892	-0.15141
YPR160W	Gph1	T(31)	RLtGFLPQEIK	1	-0.219048	0.00924914	-0.489779	-0.747521	-1.6898	-0.889557	0.387151	1.05293	1.24419	-0.848422	0.767281	1.42332
YPR161C	Sgv1	S(417)	GEsPVVK	1	-0.295962	-0.295619	-0.135405	-0.303829	0.0714979	0.113852	0.100549	0.225966	0.0785712	0.141603	0.180748	0.118028
YPR163C	Tif3	S(71)	SGGFGGsFGGR	1	-0.804086	-0.797889	-0.366117	-0.246247	0.0190046	0.0701767	0.415631	0.381506	0.344091	0.518264	0.391477	0.0741885
YPR171W	Bsp1	Y(49)	SHNSGEyRR	1	0.446534	0.607435	0.322953	0.795778	0.165795	0.395646	-0.269708	-0.799807	-0.38147	-0.686854	-0.284104	-0.312199
YPR171W	Bsp1	S(185)	ADIPSSSSSSsPPPLPTR	1	0.0979304	0.0753161	0.470789	0.431733	0.396467	0.29524	-0.603841	-0.496055	-0.236383	-0.0556373	-0.124963	-0.250596
YPR171W	Bsp1	S(220)	AEVTEsPSSR	1	-0.229714	-0.190736	0.565713	0.745255	0.314199	0.622172	-0.0337527	-0.138057	-0.273327	-0.424254	-0.343119	-0.614379
YPR171W	Bsp1	S(480)	KIsLPEALR	1	-0.16688	-0.0484324	0.655314	0.155385	0.393261	0.642449	-0.8316	-0.855495	-0.158453	-0.0628569	0.108358	0.16895
YPR171W	Bsp1	S(309)	NKPKPTPPsPPAK	1	-0.090318	0.167242	0.996895	0.559206	0.300461	0.87165	-0.483779	-0.8771	-0.21514	-0.13025	-0.50812	-0.590747
YPR171W	Bsp1	T(306)	NKPKPtPPSPPAKR	1	0.245139	0.362945	0.596211	0.500303	0.336748	0.591796	-0.371311	-0.772256	-0.328057	-0.223999	-0.47873	-0.458789
YPR171W	Bsp1	S(46)	SHNsGEYR	1	0.118501	0.458352	0.922462	0.771442	0.431513	0.603943	-1.07686	-0.823103	-0.0660042	-0.403812	-0.329611	-0.606822
YPR171W	Bsp1	S(39)	YSNIPSSKPAGEALsPVR	1	0.61941	0.782963	0.191339	0.236321	0.0823131	0.0509918	-0.467674	-0.651654	-0.295911	-0.208335	-0.129477	-0.210285
YPR174C	Ypr174C	S(170);S(175)	AVNPLVTSsPIHMsPLQSR	2	0.00835309	0.071573	-0.299371	-0.0408112	0.369046	-0.424489	0.0621232	0.33171	-0.625148	-0.318328	0.484997	0.380345
YPR174C	Ypr174C	S(158)	DNLKPTENLPPsPVR	1	0.0490379	0.0185696	0.163622	0.0792723	0.16111	0.27077	-0.0980177	-0.0851765	-0.238118	-0.0629867	-0.037633	-0.220448
YPR185W	Atg13	S(354);S(359)	ANsFEPQsWQK	2	0.033458	-0.880543	-0.776735	0.138356	-0.62093	-0.426042	-0.0911821	-0.316419	0.432441	0.616056	1.02295	0.868593
YPR185W	Atg13	S(354)	ANsFEPQSWQK	1	0.36852	1.14003	0.201722	0.0165687	-0.0599709	-0.925534	-0.639097	-0.274195	-0.108786	-0.633712	0.237611	0.676841
YPR185W	Atg13	S(580)	RNsLDK	1	0.0549623	0.254954	0.337598	0.0293215	0.0354889	-0.0855035	-0.542941	0.140393	0.121871	-0.872442	-0.0069795	0.533277
YPR185W	Atg13	S(378)	VGsIGSQSASR	1	0.0222772	0.161253	0.02723	0.378537	0.0476039	0.153354	-0.0557925	-0.179506	-0.298487	-0.571695	0.257168	0.0580574
YPR185W	Atg13	S(428)	YSSsFGNIR	1	-0.434273	-0.51362	0.212186	0.210506	-0.124707	0.27953	-0.522103	-0.682638	0.413135	0.333122	0.455762	0.3731

## Sheet: 6-2) ClassA Phosphopeptides
Table S6-2) Phosphopeptides showing a progressive increase or decrease in phosphorylation across the strain panel in the ratio value of xylose -O2/+O2.
Column Descriptions:
Column 1	Systematic name for each yeast protein.
Column 2	Protein name for each yeast protein.
Column 3	Phosphosite(s) location on each protein
Column 4	Peptide containing phosphosite (lowercased letter)
Column 5	Directionality of phosphorylation change in Y128 relative to Y22-3/Y127
1	2	3	4	5
Systematic Name	Protein Name	Phosphosite(s)	Peptide	Direction of Phosphorylation Abundance Change
YAL043C	Pta1	S(521)	RKSDDDDDGNDNEEVGNDGPTANsK	Increased Phosphorylation in Y128 Xylose -O2/+O2
YBL008W	Hir1	S(610)	GSDGTSNSIDDIAVLsEEENDFHR	Increased Phosphorylation in Y128 Xylose -O2/+O2
YBL042C	Fui1	T(61)	DTDSENNItIAQDDEK	Increased Phosphorylation in Y128 Xylose -O2/+O2
YBL067C	Ubp13	S(261)	EGsPALLTTGKPSSRPQDAPPLIVETPNEPGAPSR	Increased Phosphorylation in Y128 Xylose -O2/+O2
YBL103C	Rtg3	S(142)	SSYSMAYDsPVDR	Increased Phosphorylation in Y128 Xylose -O2/+O2
YBR028C	Ypk3	T(107)	LSItPQDIISSNIGENELSR	Increased Phosphorylation in Y128 Xylose -O2/+O2
YBR059C	Akl1	S(504)	QSSDPTISEQsPR	Increased Phosphorylation in Y128 Xylose -O2/+O2
YBR140C	Ira1	S(497)	IFsLDDISSFNSSR	Increased Phosphorylation in Y128 Xylose -O2/+O2
YBR172C	Smy2	S(128)	VsTPVQQHPLLQR	Increased Phosphorylation in Y128 Xylose -O2/+O2
YBR211C	Ame1	S(101)	SLISEsPQNVRNDEDLTTR	Increased Phosphorylation in Y128 Xylose -O2/+O2
YCL024W	Kcc4	S(679)	GGLSPGKsELAPIEESPIVSTTPLIYNDR	Increased Phosphorylation in Y128 Xylose -O2/+O2
YCL024W	Kcc4	S(558)	RQsVNAQK	Increased Phosphorylation in Y128 Xylose -O2/+O2
YCL039W	Gid7	S(294)	YQQSQDIFNIIDPDDDASFSsPPHR	Increased Phosphorylation in Y128 Xylose -O2/+O2
YCL040W	Glk1	T(162)	LGFtFSYPVDQTSLNSGTLIR	Increased Phosphorylation in Y128 Xylose -O2/+O2
YCL050C	Apa1	T(75)	GQTPEGEDPLGKPEEELtVIPEFGGADNK	Increased Phosphorylation in Y128 Xylose -O2/+O2
YCR034W	Elo2	S(338)	NVPTPSPsPKPQHR	Increased Phosphorylation in Y128 Xylose -O2/+O2
YCR088W	Abp1	S(183)	KEPVKTPsPAPAAK	Increased Phosphorylation in Y128 Xylose -O2/+O2
YCR088W	Abp1	T(157)	AStPPVKK	Increased Phosphorylation in Y128 Xylose -O2/+O2
YDL022W	Gpd1	S(27)	RSSSSVsLK	Increased Phosphorylation in Y128 Xylose -O2/+O2
YDL051W	Lhp1	S(19)	RNsFAVIEFTPEVLDR	Increased Phosphorylation in Y128 Xylose -O2/+O2
YDL099W	Bug1	S(87)	SENNDQNDVDEEsEEKEIEQVK	Increased Phosphorylation in Y128 Xylose -O2/+O2
YDL161W	Ent1	S(328)	NQLVAASsPQQLQQQK	Increased Phosphorylation in Y128 Xylose -O2/+O2
YDL225W	Shs1	S(522)	LNGSSSsINSLQQSTR	Increased Phosphorylation in Y128 Xylose -O2/+O2
YDL225W	Shs1	S(519)	LNGsSSSINSLQQSTR	Increased Phosphorylation in Y128 Xylose -O2/+O2
YDR005C	Maf1	S(90)	RDsNSFWEQK	Increased Phosphorylation in Y128 Xylose -O2/+O2
YDR028C	Reg1	S(773)	sGSTNSLYDLAQPSLSSATPQQK	Increased Phosphorylation in Y128 Xylose -O2/+O2
YDR090C	Ydr090C	S(246)	GNTFDEESGQAQKEEPDEKIEQDIsK	Increased Phosphorylation in Y128 Xylose -O2/+O2
YDR122W	Kin1	S(764)	FEGsDDDENHPLPPLNVAK	Increased Phosphorylation in Y128 Xylose -O2/+O2
YDR135C	Ycf1	S(878)	ESsIPVEGELEQLQK	Increased Phosphorylation in Y128 Xylose -O2/+O2
YDR186C	Ydr186C	S(526)	SGSSTDVLSSGIDsMAK	Increased Phosphorylation in Y128 Xylose -O2/+O2
YDR186C	Ydr186C	S(674);S(684)	FLNsPIPQHTQQAsPLLMR	Increased Phosphorylation in Y128 Xylose -O2/+O2
YDR213W	Upc2	S(524)	NSNISPSTPsAVLNDR	Increased Phosphorylation in Y128 Xylose -O2/+O2
YDR239C	Ydr239C	T(663)	EGtDAEQAEDYLKDIPGDEAYNSDDIMAPLR	Increased Phosphorylation in Y128 Xylose -O2/+O2
YDR239C	Ydr239C	T(724)	SGtLDNDYVNR	Increased Phosphorylation in Y128 Xylose -O2/+O2
YDR251W	Pam1	T(479)	QSFFNSTSDtTLSR	Increased Phosphorylation in Y128 Xylose -O2/+O2
YDR293C	Ssd1	S(40)	sQSELTNLMIEQFTLQK	Increased Phosphorylation in Y128 Xylose -O2/+O2
YDR436W	Ppz2	S(317)	GTSPIPNLNIDKPSPSASSAsK	Increased Phosphorylation in Y128 Xylose -O2/+O2
YDR458C	Heh2	T(152)	AtSADLTSELETVEELHKK	Increased Phosphorylation in Y128 Xylose -O2/+O2
YDR475C	Jip4	S(552)	EEAsDDEFNAFKDDENDVMSVK	Increased Phosphorylation in Y128 Xylose -O2/+O2
YDR497C	Itr1	S(55)	APAsDDEDR	Increased Phosphorylation in Y128 Xylose -O2/+O2
YDR508C	Gnp1	Y(54)	EKEIGSIEPENEVEyFEK	Increased Phosphorylation in Y128 Xylose -O2/+O2
YDR515W	Slf1	S(45)	SSSPDsNTVIPVEELR	Increased Phosphorylation in Y128 Xylose -O2/+O2
YEL043W	Yel043W	S(802)	ISSDFNLLVPNLsPR	Increased Phosphorylation in Y128 Xylose -O2/+O2
YER038C	Kre29	S(81)	AEsGDDFDPILKR	Increased Phosphorylation in Y128 Xylose -O2/+O2
YER079W	Yer079W	S(66)	TNSGCSITSGAsMIATK	Increased Phosphorylation in Y128 Xylose -O2/+O2
YER100W	Ubc6	T(187)	KLDEGDAANTGDETEDPFtK	Increased Phosphorylation in Y128 Xylose -O2/+O2
YER114C	Boi2	S(375);T(388)	KTSQsLEDLPSQQNFIPtPR	Increased Phosphorylation in Y128 Xylose -O2/+O2
YER118C	Sho1	Y(186)	NTTPyQNNVYNDAIR	Increased Phosphorylation in Y128 Xylose -O2/+O2
YER132C	Pmd1	S(989)	RIsNSSLLR	Increased Phosphorylation in Y128 Xylose -O2/+O2
YER164W	Chd1	S(48)	AAAHQQNYFNDSDDEDDEDNIKQsR	Increased Phosphorylation in Y128 Xylose -O2/+O2
YER164W	Chd1	S(1339)	GPAALINNTRLSPNsPAPPLK	Increased Phosphorylation in Y128 Xylose -O2/+O2
YER166W	Dnf1	S(1506)	ETQDLLQsPQFQQAQTFGR	Increased Phosphorylation in Y128 Xylose -O2/+O2
YER167W	Bck2	S(334)	HSPDsPR	Increased Phosphorylation in Y128 Xylose -O2/+O2
YFL021W	Gat1	S(274)	NPSPSIVKPGsR	Increased Phosphorylation in Y128 Xylose -O2/+O2
YFL042C	Lam5	S(128)	REPsMGSK	Increased Phosphorylation in Y128 Xylose -O2/+O2
YFL042C	Lam5	S(140)	RIsNATIAEIGSPLQQVEKPDEVK	Increased Phosphorylation in Y128 Xylose -O2/+O2
YFR015C	Gsy1	S(651);S(655)	IARPLsVPGsPK	Increased Phosphorylation in Y128 Xylose -O2/+O2
YFR053C	Hxk1	T(156)	DTLPLGFtFSYPASQNK	Increased Phosphorylation in Y128 Xylose -O2/+O2
YFR053C	Hxk1	S(158)	DTLPLGFTFsYPASQNK	Increased Phosphorylation in Y128 Xylose -O2/+O2
YFR053C	Hxk1	S(15)	GsMADVPK	Increased Phosphorylation in Y128 Xylose -O2/+O2
YFR053C	Hxk1	S(272)	LADDIPSNSPMAINCEYGsFDNEHLVLPR	Increased Phosphorylation in Y128 Xylose -O2/+O2
YGL009C	Leu1	S(488)	EFEYKDQDQSsPNVEVTSEDEK	Increased Phosphorylation in Y128 Xylose -O2/+O2
YGL013C	Pdr1	S(942);S(948)	SAPsPVRNNsLPEFAQLPSFR	Increased Phosphorylation in Y128 Xylose -O2/+O2
YGL035C	Mig1	S(314)	RPSSVLsLNDLLVGQR	Increased Phosphorylation in Y128 Xylose -O2/+O2
YGL062W	Pyc1	T(527)	SNPSVPHLHDAQGNVINVtK	Increased Phosphorylation in Y128 Xylose -O2/+O2
YGL083W	Scy1	T(673)	TGSSYGEtSPQSK	Increased Phosphorylation in Y128 Xylose -O2/+O2
YGL120C	Prp43	S(31)	RFSSEHPDPVETSIPEQAAEIAEELsK	Increased Phosphorylation in Y128 Xylose -O2/+O2
YGL164C	Yrb30	Y(263)	yHEDDDKEDTPQELAIDLNHIK	Increased Phosphorylation in Y128 Xylose -O2/+O2
YGL197W	Mds3	S(817)	QLQQLQQHTIQNPHNHLsPR	Increased Phosphorylation in Y128 Xylose -O2/+O2
YGL197W	Mds3	S(919);T(920)	RSstPETENAFSATPR	Increased Phosphorylation in Y128 Xylose -O2/+O2
YGL205W	Pox1	S(40)	IKVDQVNTFLEsSPERR	Increased Phosphorylation in Y128 Xylose -O2/+O2
YGL237C	Hap2	S(52)	EKPIEMPLDMGKAPsPR	Increased Phosphorylation in Y128 Xylose -O2/+O2
YGR116W	Spt6	S(155)	LEDFFsEDEEEEESGLR	Increased Phosphorylation in Y128 Xylose -O2/+O2
YGR260W	Tna1	S(45)	HLVDDVLFISPTNDGSEEKPTEVTFQEDEGHDAsLHNR	Increased Phosphorylation in Y128 Xylose -O2/+O2
YGR285C	Zuo1	S(50)	NHTWsEFER	Increased Phosphorylation in Y128 Xylose -O2/+O2
YHR132W-A	Igo2	Y(66)	QYFDSGDyALKK	Increased Phosphorylation in Y128 Xylose -O2/+O2
YHR146W	Crp1	S(390);S(394)	LPLTDEQTAEGRKsPAVsEEKEK	Increased Phosphorylation in Y128 Xylose -O2/+O2
YHR154W	Rtt107	S(540)	KDGTPISSFENsIDEK	Increased Phosphorylation in Y128 Xylose -O2/+O2
YHR159W	Tda11	S(247)	AFsPVYQNIPLESR	Increased Phosphorylation in Y128 Xylose -O2/+O2
YIL033C	Bcy1	T(160)	RTSVSGETLQPNNFDDWtPDHYK	Increased Phosphorylation in Y128 Xylose -O2/+O2
YIL033C	Bcy1	T(129);T(131)	EKtStPPLPMHFNAQR	Increased Phosphorylation in Y128 Xylose -O2/+O2
YIL033C	Bcy1	S(130);T(131)	EKTstPPLPMHFNAQR	Increased Phosphorylation in Y128 Xylose -O2/+O2
YIL106W	Mob1	T(64)	ADFtNNPVNGYNESDHGRMSPVLTTPK	Increased Phosphorylation in Y128 Xylose -O2/+O2
YIL115C	Nup159	Y(886)	DHNDDPKDGyVSGSEISVR	Increased Phosphorylation in Y128 Xylose -O2/+O2
YIL122W	Pog1	S(164)	KINAsELASPR	Increased Phosphorylation in Y128 Xylose -O2/+O2
YIR003W	Aim21	S(675);S(678)	ELSGGYEDVDSALHSEEAsFHsL	Increased Phosphorylation in Y128 Xylose -O2/+O2
YIR003W	Aim21	S(360)	RVsEECDSTLISTEEESK	Increased Phosphorylation in Y128 Xylose -O2/+O2
YIR006C	Pan1	S(1164)	QIEDAQNEsDEEETNGKDNFGGHVNVPQAAPVAPSAAFSQNSTNAPR	Increased Phosphorylation in Y128 Xylose -O2/+O2
YIR033W	Mga2	S(674)	IVGNDSPDSGTNGNSCsK	Increased Phosphorylation in Y128 Xylose -O2/+O2
YIR033W	Mga2	S(467)	TIsLTNIEQQSQLNQR	Increased Phosphorylation in Y128 Xylose -O2/+O2
YJL020C	Bbc1	S(69)	SFVAVQGsEVGKEAESSPNTGSTEQR	Increased Phosphorylation in Y128 Xylose -O2/+O2
YJL020C	Bbc1	S(627)	NGSINsLTK	Increased Phosphorylation in Y128 Xylose -O2/+O2
YJL026W	Rnr2	S(15)	AAADALsDLEIK	Increased Phosphorylation in Y128 Xylose -O2/+O2
YJL026W	Rnr2	S(22)	AAADALSDLEIKDsK	Increased Phosphorylation in Y128 Xylose -O2/+O2
YJL123C	Mtc1	S(450)	KQKESEDEDEDEDDEIIDPsEWVK	Increased Phosphorylation in Y128 Xylose -O2/+O2
YJL123C	Mtc1	S(281)	KPSVADGELGNsK	Increased Phosphorylation in Y128 Xylose -O2/+O2
YJL146W	Ids2	S(126)	ESVSDILNDLTLGSPEPsER	Increased Phosphorylation in Y128 Xylose -O2/+O2
YJL164C	Tpk1	S(41)	ETTATESGNEsK	Increased Phosphorylation in Y128 Xylose -O2/+O2
YJR104C	Sod1	S(39)	FEQASESEPTTVSYEIAGNsPNAER	Increased Phosphorylation in Y128 Xylose -O2/+O2
YKL038W	Rgt1	S(202)	KGsIDSLQSDISVR	Increased Phosphorylation in Y128 Xylose -O2/+O2
YKL042W	Spc42	S(284)	KLsLNNQLQELQSMMDGDDNIKLDNVSK	Increased Phosphorylation in Y128 Xylose -O2/+O2
YKL089W	Mif2	S(325)	IVTYDEsEDEEEILAAQR	Increased Phosphorylation in Y128 Xylose -O2/+O2
YKL105C	Seg2	S(137)	TTsLGNSGSTIR	Increased Phosphorylation in Y128 Xylose -O2/+O2
YKL126W	Ypk1	S(71)	GTINPSNSSVVPVRVsYDASSSTSTVR	Increased Phosphorylation in Y128 Xylose -O2/+O2
YKL185W	Ash1	S(465);S(469)	FALDsPPQsPR	Increased Phosphorylation in Y128 Xylose -O2/+O2
YKL204W	Eap1	S(447)	GKsETSTPPPPPPGLIAHQGPQFPVMGVPPNFPQR	Increased Phosphorylation in Y128 Xylose -O2/+O2
YKL217W	Jen1	S(586)	YINQVEEYEADGLSIsDIVEQK	Increased Phosphorylation in Y128 Xylose -O2/+O2
YKR091W	Srl3	S(212)	SNKVDNVNVsPLR	Increased Phosphorylation in Y128 Xylose -O2/+O2
YKR091W	Srl3	T(238)	RTQSTQENSLQEIVAIDtLLK	Increased Phosphorylation in Y128 Xylose -O2/+O2
YLL021W	Spa2	S(1042)	IAAQESIKsPEAAR	Increased Phosphorylation in Y128 Xylose -O2/+O2
YLR177W	Ylr177W	T(246)	RNTQPVLNLHPAAAPtNDAGLAVVDGK	Increased Phosphorylation in Y128 Xylose -O2/+O2
YLR181C	Vta1	S(72)	EIGGESEAEDsDK	Increased Phosphorylation in Y128 Xylose -O2/+O2
YLR220W	Ccc1	S(81)	NGDsGSDNEKTNLGFFQSVDPR	Increased Phosphorylation in Y128 Xylose -O2/+O2
YLR226W	Bur2	S(24)	FQAVPKPTSNAsPPPASSGFNAR	Increased Phosphorylation in Y128 Xylose -O2/+O2
YLR258W	Gsy2	S(655)	VARPLSVPGsPR	Increased Phosphorylation in Y128 Xylose -O2/+O2
YLR270W	Dcs1	S(60)	RPsQDGR	Increased Phosphorylation in Y128 Xylose -O2/+O2
YLR278C	Ylr278C	S(1141)	DVEESNFsTSPLR	Increased Phosphorylation in Y128 Xylose -O2/+O2
YLR319C	Bud6	S(343)	TPLPIENVRAsPR	Increased Phosphorylation in Y128 Xylose -O2/+O2
YLR327C	Tma10	S(79)	RLsDLQQYHI	Increased Phosphorylation in Y128 Xylose -O2/+O2
YLR327C	Tma10	Y(84)	RLSDLQQyHI	Increased Phosphorylation in Y128 Xylose -O2/+O2
YLR345W	Ylr345W	S(6)	PNVLsDDEELLNGLGSEIMKPSR	Increased Phosphorylation in Y128 Xylose -O2/+O2
YLR362W	Ste11	S(344)	RPLsAESNNIGDILLK	Increased Phosphorylation in Y128 Xylose -O2/+O2
YLR413W	Ina1	S(665)	IIEEHEsPIDAEK	Increased Phosphorylation in Y128 Xylose -O2/+O2
YML006C	Gis4	S(174)	LESNVsDDQWSNINTQTSTATR	Increased Phosphorylation in Y128 Xylose -O2/+O2
YML017W	Psp2	S(340)	LGsPALELQSKPDK	Increased Phosphorylation in Y128 Xylose -O2/+O2
YML070W	Dak1	T(376)	TSAPSVNDDLLHNEVtAK	Increased Phosphorylation in Y128 Xylose -O2/+O2
YML100W	Tsl1	S(77)	SATRsPSAFNR	Increased Phosphorylation in Y128 Xylose -O2/+O2
YML123C	Pho84	T(302);S(303)	IHDtsDEDMAINGLER	Increased Phosphorylation in Y128 Xylose -O2/+O2
YMR111C	Ymr111C	S(237);S(249)	IKPEPGLsDFENGEYDGNEsDENATTR	Increased Phosphorylation in Y128 Xylose -O2/+O2
YMR155W	Ymr155W	S(237)	ETDDNIVPLYENSNDYIGsPVR	Increased Phosphorylation in Y128 Xylose -O2/+O2
YMR165C	Pah1	S(602)	TNTSMVPGsPPNR	Increased Phosphorylation in Y128 Xylose -O2/+O2
YMR196W	Ymr196W	S(1088)	AKDEDIDPMDPMSPLNKDVs	Increased Phosphorylation in Y128 Xylose -O2/+O2
YMR229C	Rrp5	S(178);S(198)	sKVEDAEYESSDDEDEKLDKsNELPNLR	Increased Phosphorylation in Y128 Xylose -O2/+O2
YMR295C	Ymr295C	Y(72)	QSyFSNEEGHVLCDVFGQPITQADISNPTR	Increased Phosphorylation in Y128 Xylose -O2/+O2
YNL074C	Mlf3	S(11)	SNSNNsNPSFIFER	Increased Phosphorylation in Y128 Xylose -O2/+O2
YNL076W	Mks1	T(566)	LDNTSIANSNGNGNDDtSNQR	Increased Phosphorylation in Y128 Xylose -O2/+O2
YNL085W	Mkt1	T(377)	SNLSSPSSASSSASPATTVtK	Increased Phosphorylation in Y128 Xylose -O2/+O2
YNL127W	Far11	S(524);S(528)	HIATPAPsPPSsPQLMHLGEGPRPR	Increased Phosphorylation in Y128 Xylose -O2/+O2
YNL167C	Sko1	S(94);S(96)	KDsPsFLPGQQRPTIISPPILTPGGSK	Increased Phosphorylation in Y128 Xylose -O2/+O2
YNL309W	Stb1	T(164)	KEDTPStPR	Increased Phosphorylation in Y128 Xylose -O2/+O2
YNR047W	Fpk1	S(300);S(303)	NLsNLsLNEIKENEEVQEFNNEDFFFHDIPK	Increased Phosphorylation in Y128 Xylose -O2/+O2
YNR052C	Pop2	S(39)	QASEQHQQQNMGPQVYsPQVNR	Increased Phosphorylation in Y128 Xylose -O2/+O2
YOL004W	Sin3	S(318)	VTTPMGTTTVNNNISPsGR	Increased Phosphorylation in Y128 Xylose -O2/+O2
YOL006C	Top1	S(24);T(26)	VNHELSSDDDDDVPLsQtLKK	Increased Phosphorylation in Y128 Xylose -O2/+O2
YOL051W	Gal11	T(835)	NGtPNPNNMK	Increased Phosphorylation in Y128 Xylose -O2/+O2
YOL081W	Ira2	S(870)	GsSPSLCSTTR	Increased Phosphorylation in Y128 Xylose -O2/+O2
YOR042W	Cue5	S(96)	RKSEEEPsKENPILQELK	Increased Phosphorylation in Y128 Xylose -O2/+O2
YOR051C	Ett1	S(38)	sQMSVELDDDADLDDELAQLK	Increased Phosphorylation in Y128 Xylose -O2/+O2
YOR109W	Inp53	S(986)	EKsPTPQTSTASLSSVTK	Increased Phosphorylation in Y128 Xylose -O2/+O2
YOR123C	Leo1	S(372)	KQNsPTTYGASR	Increased Phosphorylation in Y128 Xylose -O2/+O2
YOR123C	Leo1	S(358)	EKEKQEsPDAAFETGFR	Increased Phosphorylation in Y128 Xylose -O2/+O2
YOR124C	Ubp2	S(907);T(919)	KKNESNDAEVsENEDTTGLTSPtR	Increased Phosphorylation in Y128 Xylose -O2/+O2
YOR124C	Ubp2	S(901);S(917)	KKNEsNDAEVSENEDTTGLTsPTR	Increased Phosphorylation in Y128 Xylose -O2/+O2
YOR195W	Slk19	T(273)	EKEDEENDITNSHINRLtPLYETSAR	Increased Phosphorylation in Y128 Xylose -O2/+O2
YOR198C	Bfr1	S(260)	EEEQRLsK	Increased Phosphorylation in Y128 Xylose -O2/+O2
YOR206W	Noc2	S(149)	YLEENDKDLLDFAGTNPLDGIDsQDEGEDAER	Increased Phosphorylation in Y128 Xylose -O2/+O2
YOR206W	Noc2	Y(127)	yLEENDKDLLDFAGTNPLDGIDSQDEGEDAER	Increased Phosphorylation in Y128 Xylose -O2/+O2
YOR227W	Her1	S(157)	SSsISTSLNER	Increased Phosphorylation in Y128 Xylose -O2/+O2
YOR229W	Wtm2	Y(115)	SAATPNPEyGDAFQDVEGKPLRPK	Increased Phosphorylation in Y128 Xylose -O2/+O2
YOR370C	Mrs6	S(470)	LGQsFK	Increased Phosphorylation in Y128 Xylose -O2/+O2
YOR374W	Ald4	Y(507)	EMSVDALQNyLQVK	Increased Phosphorylation in Y128 Xylose -O2/+O2
YPL049C	Dig1	T(304)	NSNVGSSANASPtQQR	Increased Phosphorylation in Y128 Xylose -O2/+O2
YPL070W	Muk1	T(71)	LENNKSPILtK	Increased Phosphorylation in Y128 Xylose -O2/+O2
YPL070W	Muk1	S(523);S(526)	SSsQLsMELSNR	Increased Phosphorylation in Y128 Xylose -O2/+O2
YPL085W	Sec16	S(678);S(681)	KGsNNsNRPPVIPLGTQGPR	Increased Phosphorylation in Y128 Xylose -O2/+O2
YPL085W	Sec16	S(1611);T(1615)	REsIIStGSEFLPPPK	Increased Phosphorylation in Y128 Xylose -O2/+O2
YPL085W	Sec16	S(678)	KGsNNSNRPPVIPLGTQGPR	Increased Phosphorylation in Y128 Xylose -O2/+O2
YPL085W	Sec16	T(159)	NPSLDVVAGELHNNNEHtQK	Increased Phosphorylation in Y128 Xylose -O2/+O2
YPL201C	Yig1	T(56)	EHIDQLtFSNVGQDGGDVGNYSEEDDDGDEEKELEDVFR	Increased Phosphorylation in Y128 Xylose -O2/+O2
YPL219W	Pcl8	S(32)	SMSEFYDDDDDNDsDMCR	Increased Phosphorylation in Y128 Xylose -O2/+O2
YPL221W	Flc1	S(714);S(717)	ITQQEVSPDRASSsPNsK	Increased Phosphorylation in Y128 Xylose -O2/+O2
YPR041W	Tif5	S(397)	RAAKPFITWLETAEsDDDEEDDE	Increased Phosphorylation in Y128 Xylose -O2/+O2
YPR072W	Not5	S(377)	YLMQPLQEMsPK	Increased Phosphorylation in Y128 Xylose -O2/+O2
YPR074C	Tkl1	S(492)	sLPNIQVWRPADGNEVSAAYK	Increased Phosphorylation in Y128 Xylose -O2/+O2
YPR075C	Opy2	S(310)	LVQIAEEESDKEIQDLDVIEEQTEADDLsHMAK	Increased Phosphorylation in Y128 Xylose -O2/+O2
YPR079W	Mrl1	S(279)	NDDELHDIsPSLNEQPHWDLIEDGSR	Increased Phosphorylation in Y128 Xylose -O2/+O2
YPR105C	Cog4	S(352)	NEDVNIGSNQsDIETDGETEK	Increased Phosphorylation in Y128 Xylose -O2/+O2
YPR115W	Rgc1	S(966)	RGsDLSPFEMESPLFEENR	Increased Phosphorylation in Y128 Xylose -O2/+O2
YPR124W	Ctr1	S(384);S(395)	HPEPsPDPIAVADTTsGSDQSTR	Increased Phosphorylation in Y128 Xylose -O2/+O2
YPR160W	Gph1	S(19)	PPASTSTTNDMITEEPTsPHQIPR	Increased Phosphorylation in Y128 Xylose -O2/+O2
YPR185W	Atg13	S(354);S(359)	ANsFEPQsWQK	Increased Phosphorylation in Y128 Xylose -O2/+O2
YPR185W	Atg13	S(354)	ANsFEPQSWQK	Increased Phosphorylation in Y128 Xylose -O2/+O2
YAL034C	Fun19	S(110)	ISHNGsPR	Decreased Phosphorylation in Y128 Xylose -O2/+O2
YAL035W	Fun12	S(379);T(380)	stPAATPAATPTPSSASPNKK	Decreased Phosphorylation in Y128 Xylose -O2/+O2
YAR002W	Nup60	S(483)	SNLsQENDNEGK	Decreased Phosphorylation in Y128 Xylose -O2/+O2
YAR042W	Swh1	T(1052);S(1055)	IKtANsATGGPK	Decreased Phosphorylation in Y128 Xylose -O2/+O2
YBL047C	Ede1	S(931)	FVETTVENsNLNVNR	Decreased Phosphorylation in Y128 Xylose -O2/+O2
YBL058W	Shp1	S(225)	LGSTIDAADEVVEDNTsQSQR	Decreased Phosphorylation in Y128 Xylose -O2/+O2
YBL085W	Boi1	Y(98)	yGNLNDSASNIGK	Decreased Phosphorylation in Y128 Xylose -O2/+O2
YBL086C	Ybl086C	T(427)	THNDEDNENtANDKGSDKDNNFVEDNNPTDFLTDR	Decreased Phosphorylation in Y128 Xylose -O2/+O2
YBR049C	Reb1	S(56)	KQNIVESSsDVDVNNNDDSNR	Decreased Phosphorylation in Y128 Xylose -O2/+O2
YBR054W	Yro2	S(299);S(301);S(302)	SSDsDssIKEK	Decreased Phosphorylation in Y128 Xylose -O2/+O2
YBR054W	Yro2	S(301);S(302)	SSDSDssIKEK	Decreased Phosphorylation in Y128 Xylose -O2/+O2
YBR059C	Akl1	S(523);S(524)	STSSYssGGR	Decreased Phosphorylation in Y128 Xylose -O2/+O2
YBR072W	Hsp26	T(42)	QLANtPAK	Decreased Phosphorylation in Y128 Xylose -O2/+O2
YBR114W	Rad16	S(109)	DVsDDDEPLTK	Decreased Phosphorylation in Y128 Xylose -O2/+O2
YBR114W	Rad16	T(29)	KSVNYNELSDDDtAVK	Decreased Phosphorylation in Y128 Xylose -O2/+O2
YBR127C	Vma2	S(511);S(515)	KDAsQEEsLI	Decreased Phosphorylation in Y128 Xylose -O2/+O2
YBR181C	Rps6B	T(163)	REVtKGEK	Decreased Phosphorylation in Y128 Xylose -O2/+O2
YBR207W	Fth1	S(453)	SKDSsVPLIIDSSGSAN	Decreased Phosphorylation in Y128 Xylose -O2/+O2
YBR247C	Enp1	S(190)	EKESQVEDMQDDEPLANEQNTsR	Decreased Phosphorylation in Y128 Xylose -O2/+O2
YCL037C	Sro9	S(55)	LAPTEIPVSTIsIEDLDATR	Decreased Phosphorylation in Y128 Xylose -O2/+O2
YCR011C	Adp1	S(702)	sLLRDEEDVEGTDGR	Decreased Phosphorylation in Y128 Xylose -O2/+O2
YCR016W	Ycr016W	S(25)	QTISSGDEsK	Decreased Phosphorylation in Y128 Xylose -O2/+O2
YCR021C	Hsp30	T(331)	ASGETAIHEPEPEAEQAVEDtA	Decreased Phosphorylation in Y128 Xylose -O2/+O2
YCR057C	Pwp2	S(244)	RPSDDDDNESEDEDKQEEVDIsK	Decreased Phosphorylation in Y128 Xylose -O2/+O2
YDL003W	Mcd1	S(263)	NDQNNDDDDNsVEQGR	Decreased Phosphorylation in Y128 Xylose -O2/+O2
YDL084W	Sub2	S(24)	MSHEGEEDLLEYSDNEQEIQIDAsK	Decreased Phosphorylation in Y128 Xylose -O2/+O2
YDL105W	Nse4	S(13)	RNsTVTEPDSSGETR	Decreased Phosphorylation in Y128 Xylose -O2/+O2
YDL182W	Lys20	T(417)	KNDSDVPELAtIPAAK	Decreased Phosphorylation in Y128 Xylose -O2/+O2
YDL223C	Hbt1	S(990);S(993)	GSDYDYNNsTHsAEHTPR	Decreased Phosphorylation in Y128 Xylose -O2/+O2
YDL223C	Hbt1	S(301);S(303)	GYSNTDsNsDRDVIPGNFR	Decreased Phosphorylation in Y128 Xylose -O2/+O2
YDL223C	Hbt1	S(1034)	sISGGTFGFR	Decreased Phosphorylation in Y128 Xylose -O2/+O2
YDR033W	Mrh1	T(295);S(299)	APVASPRPAAtPNLsK	Decreased Phosphorylation in Y128 Xylose -O2/+O2
YDR135C	Ycf1	S(908);T(911);S(914)	RAsDAtLGsIDFGDDENIAK	Decreased Phosphorylation in Y128 Xylose -O2/+O2
YDR170C	Sec7	S(1752)	AHQEEsSEDVGGDMVETLNGQTK	Decreased Phosphorylation in Y128 Xylose -O2/+O2
YDR170C	Sec7	T(1240)	KAtPTELAQEK	Decreased Phosphorylation in Y128 Xylose -O2/+O2
YDR170C	Sec7	S(1804)	NEsNEDIR	Decreased Phosphorylation in Y128 Xylose -O2/+O2
YDR170C	Sec7	T(819)	SLSSQNIDADDPtQFENLK	Decreased Phosphorylation in Y128 Xylose -O2/+O2
YDR207C	Ume6	S(59)	HAEDEVsDGANSR	Decreased Phosphorylation in Y128 Xylose -O2/+O2
YDR229W	Ivy1	S(32)	VDWDNGNHFDVsPDR	Decreased Phosphorylation in Y128 Xylose -O2/+O2
YDR266C	Hel2	S(556);S(564)	KGsSSTSLNNsK	Decreased Phosphorylation in Y128 Xylose -O2/+O2
YDR266C	Hel2	S(564)	KGSSSTSLNNsK	Decreased Phosphorylation in Y128 Xylose -O2/+O2
YDR293C	Ssd1	S(286)	NQSQQPQQQLsPFR	Decreased Phosphorylation in Y128 Xylose -O2/+O2
YDR365C	Esf1	S(86)	EAENDEDsEVNAK	Decreased Phosphorylation in Y128 Xylose -O2/+O2
YDR381W	Yra1	Y(222)	SLEDLDKEMADyFEK	Decreased Phosphorylation in Y128 Xylose -O2/+O2
YDR389W	Sac7	S(18)	IENVSPsK	Decreased Phosphorylation in Y128 Xylose -O2/+O2
YDR389W	Sac7	S(632)	SNALPLTEDDGDERNsR	Decreased Phosphorylation in Y128 Xylose -O2/+O2
YDR422C	Sip1	T(665)	GVERPStPFSDYR	Decreased Phosphorylation in Y128 Xylose -O2/+O2
YDR450W	Rps18A	S(43)	RYsNLVCK	Decreased Phosphorylation in Y128 Xylose -O2/+O2
YDR471W	Rpl27B	S(97)	SVVsTETFEQPSQR	Decreased Phosphorylation in Y128 Xylose -O2/+O2
YDR471W	Rpl27B	T(98)	SVVStETFEQPSQR	Decreased Phosphorylation in Y128 Xylose -O2/+O2
YDR507C	Gin4	S(930)	KQNsQEGDEAHPK	Decreased Phosphorylation in Y128 Xylose -O2/+O2
YDR507C	Gin4	S(471)	RAsVINVEK	Decreased Phosphorylation in Y128 Xylose -O2/+O2
YEL032W	Mcm3	S(781)	QPASNSGsPIK	Decreased Phosphorylation in Y128 Xylose -O2/+O2
YEL063C	Can1	S(38)	RGsIPLKDEK	Decreased Phosphorylation in Y128 Xylose -O2/+O2
YER026C	Cho1	S(42)	DENDGYASDEVGGTLsR	Decreased Phosphorylation in Y128 Xylose -O2/+O2
YER030W	Chz1	S(66);T(71)	sENNGtVEDSESDMDDAK	Decreased Phosphorylation in Y128 Xylose -O2/+O2
YER033C	Zrg8	S(11);T(12)	stSFDESPKR	Decreased Phosphorylation in Y128 Xylose -O2/+O2
YER120W	Scs2	T(145)	EtVEPVVQDSEPKEVPAVVNEK	Decreased Phosphorylation in Y128 Xylose -O2/+O2
YER132C	Pmd1	S(1354);S(1356)	RsSsFTETVPTEPTR	Decreased Phosphorylation in Y128 Xylose -O2/+O2
YER151C	Ubp3	S(257)	SHsIPK	Decreased Phosphorylation in Y128 Xylose -O2/+O2
YER164W	Chd1	S(1372)	EYDsMDEEDCR	Decreased Phosphorylation in Y128 Xylose -O2/+O2
YFL014W	Hsp12	S(21)	ASEALKPDsQK	Decreased Phosphorylation in Y128 Xylose -O2/+O2
YFL014W	Hsp12	S(73)	DNAEGQGEsLADQAR	Decreased Phosphorylation in Y128 Xylose -O2/+O2
YFL014W	Hsp12	S(87)	sKLNDAVEYVSGR	Decreased Phosphorylation in Y128 Xylose -O2/+O2
YFL038C	Ypt1	T(181)	ESMSQQNLNEtTQK	Decreased Phosphorylation in Y128 Xylose -O2/+O2
YFR024C-A	Lsb3	T(298);S(303)	LAPtNSGGsGGK	Decreased Phosphorylation in Y128 Xylose -O2/+O2
YGL014W	Puf4	S(286)	IEETsKEDLINK	Decreased Phosphorylation in Y128 Xylose -O2/+O2
YGL023C	Pib2	S(165)	TLPFTDDQRsNPELDPTNSVVDVSR	Decreased Phosphorylation in Y128 Xylose -O2/+O2
YGL035C	Mig1	S(264)	QLQQQQNSLsPR	Decreased Phosphorylation in Y128 Xylose -O2/+O2
YGL133W	Itc1	S(291)	SNSANVSSPEsEK	Decreased Phosphorylation in Y128 Xylose -O2/+O2
YGL222C	Edc1	S(82);S(85)	KHsPPsSPSSTTTLGK	Decreased Phosphorylation in Y128 Xylose -O2/+O2
YGR145W	Enp2	S(671);S(672)	HDNssDEEGIDENGNK	Decreased Phosphorylation in Y128 Xylose -O2/+O2
YGR148C	Rpl24B	S(86)	AQRPITGAsLDLIK	Decreased Phosphorylation in Y128 Xylose -O2/+O2
YGR152C	Rsr1	S(192)	IESPsTR	Decreased Phosphorylation in Y128 Xylose -O2/+O2
YGR162W	Tif4631	S(200)	ASSEENIsEAEK	Decreased Phosphorylation in Y128 Xylose -O2/+O2
YGR162W	Tif4631	S(553)	ERGsYR	Decreased Phosphorylation in Y128 Xylose -O2/+O2
YGR162W	Tif4631	Y(554)	ERGSyRNEEK	Decreased Phosphorylation in Y128 Xylose -O2/+O2
YGR162W	Tif4631	S(502);S(503)	FGNNssRGHDFR	Decreased Phosphorylation in Y128 Xylose -O2/+O2
YGR162W	Tif4631	S(168)	STVSPQPEsK	Decreased Phosphorylation in Y128 Xylose -O2/+O2
YGR162W	Tif4631	S(916);S(920)	TYsQRNsQR	Decreased Phosphorylation in Y128 Xylose -O2/+O2
YGR178C	Pbp1	T(150)	AQETtPAR	Decreased Phosphorylation in Y128 Xylose -O2/+O2
YGR211W	Zpr1	S(23)	EDLFKPVGEAAAEVEDEsIAEQNK	Decreased Phosphorylation in Y128 Xylose -O2/+O2
YGR245C	Sda1	S(278)	EENFEENsEDEDGFDLDALR	Decreased Phosphorylation in Y128 Xylose -O2/+O2
YGR280C	Pxr1	S(159)	EGDDsEDEDDDDKEDKESDK	Decreased Phosphorylation in Y128 Xylose -O2/+O2
YGR280C	Pxr1	S(230)	SSEsASNIPDAVNTR	Decreased Phosphorylation in Y128 Xylose -O2/+O2
YHL007C	Ste20	T(511)	QTHAPtTPNK	Decreased Phosphorylation in Y128 Xylose -O2/+O2
YHL008C	Yhl008C	S(309)	NECEEDIKDEVsDDDATETGGDVEDLTEK	Decreased Phosphorylation in Y128 Xylose -O2/+O2
YHR010W	Rpl27A	S(97)	SVVsTETFEQPSQR	Decreased Phosphorylation in Y128 Xylose -O2/+O2
YHR010W	Rpl27A	T(98)	SVVStETFEQPSQR	Decreased Phosphorylation in Y128 Xylose -O2/+O2
YHR027C	Rpn1	S(182)	DAEDETSSDGsK	Decreased Phosphorylation in Y128 Xylose -O2/+O2
YHR052W	Cic1	S(368)	ESSEsEAVK	Decreased Phosphorylation in Y128 Xylose -O2/+O2
YHR053C	Cup1-1	S(31)	sCSCPTGCNSDDKCPCGNK	Decreased Phosphorylation in Y128 Xylose -O2/+O2
YHR055C	Cup1-2	S(31)	sCSCPTGCNSDDKCPCGNK	Decreased Phosphorylation in Y128 Xylose -O2/+O2
YHR064C	Ssz1	S(511)	EENAEEDDEsEWSDDEPEVVR	Decreased Phosphorylation in Y128 Xylose -O2/+O2
YHR097C	Yhr097C	S(233)	ANSSTTTLDAIKPNsK	Decreased Phosphorylation in Y128 Xylose -O2/+O2
YHR097C	Yhr097C	T(313)	tHSGHLEQK	Decreased Phosphorylation in Y128 Xylose -O2/+O2
YIL033C	Bcy1	S(70);S(74);S(77)	NIVLFPEPEESFsRPQsAQsQSR	Decreased Phosphorylation in Y128 Xylose -O2/+O2
YIL033C	Bcy1	S(68);S(77)	NIVLFPEPEEsFSRPQSAQsQSR	Decreased Phosphorylation in Y128 Xylose -O2/+O2
YIL033C	Bcy1	S(74);S(77)	NIVLFPEPEESFSRPQsAQsQSR	Decreased Phosphorylation in Y128 Xylose -O2/+O2
YIL126W	Sth1	S(1045)	EDsEPLGR	Decreased Phosphorylation in Y128 Xylose -O2/+O2
YIL149C	Mlp2	S(1501)	GsGEDAEEELWNSPSK	Decreased Phosphorylation in Y128 Xylose -O2/+O2
YIL150C	Mcm10	S(454)	RRESsGLEDK	Decreased Phosphorylation in Y128 Xylose -O2/+O2
YIL161W	Yil161W	T(25)	KASGLGNEGtPIGNEESTNK	Decreased Phosphorylation in Y128 Xylose -O2/+O2
YIR002C	Mph1	Y(20)	ASADDYFSDFEDDELDKLyEK	Decreased Phosphorylation in Y128 Xylose -O2/+O2
YIR006C	Pan1	S(1039)	SIsSENSR	Decreased Phosphorylation in Y128 Xylose -O2/+O2
YIR006C	Pan1	T(560)	tGFGNNEIYTK	Decreased Phosphorylation in Y128 Xylose -O2/+O2
YJL033W	Hca4	S(692)	EMEAAMEEEIsGDEEEGK	Decreased Phosphorylation in Y128 Xylose -O2/+O2
YJL123C	Mtc1	S(341)	EADATPDDDRSSISSNsNK	Decreased Phosphorylation in Y128 Xylose -O2/+O2
YJL128C	Pbs2	S(74)	SASVGSNQsEQDK	Decreased Phosphorylation in Y128 Xylose -O2/+O2
YJL130C	Ura2	T(1859)	RFSItEEAIADNLDAAEDAIPEQPLEQK	Decreased Phosphorylation in Y128 Xylose -O2/+O2
YJL130C	Ura2	S(200)	VsIDEPK	Decreased Phosphorylation in Y128 Xylose -O2/+O2
YJL176C	Swi3	T(191)	IQKEEEPENNTVIEGVKEESQPDENtK	Decreased Phosphorylation in Y128 Xylose -O2/+O2
YJL177W	Rpl17B	S(66)	FNSsIGR	Decreased Phosphorylation in Y128 Xylose -O2/+O2
YJL177W	Rpl17B	S(65)	RFNsSIGR	Decreased Phosphorylation in Y128 Xylose -O2/+O2
YJR072C	Npa3	S(352)	GEVNENsAPDLQR	Decreased Phosphorylation in Y128 Xylose -O2/+O2
YKL054C	Def1	S(273)	EIsDIK	Decreased Phosphorylation in Y128 Xylose -O2/+O2
YKL054C	Def1	S(113)	SSNNSNSFTsTK	Decreased Phosphorylation in Y128 Xylose -O2/+O2
YKL090W	Cue2	S(109)	DNQANsPDSVKR	Decreased Phosphorylation in Y128 Xylose -O2/+O2
YKR023W	Ykr023W	S(487)	KNsDTVQQNR	Decreased Phosphorylation in Y128 Xylose -O2/+O2
YKR031C	Spo14	S(286)	GNNNNNTGENSDRRPsIPR	Decreased Phosphorylation in Y128 Xylose -O2/+O2
YKR056W	Trm2	S(55);S(56)	RLssPLTDSGNR	Decreased Phosphorylation in Y128 Xylose -O2/+O2
YKR057W	Rps21A	S(65)	GEsDDSLNR	Decreased Phosphorylation in Y128 Xylose -O2/+O2
YKR057W	Rps21A	S(84)	NVWsYSR	Decreased Phosphorylation in Y128 Xylose -O2/+O2
YKR090W	Pxl1	S(193)	EQDLsPIER	Decreased Phosphorylation in Y128 Xylose -O2/+O2
YLL018C	Dps1	S(30)	AVEESAEPAQVILGEDGKPLsK	Decreased Phosphorylation in Y128 Xylose -O2/+O2
YLL021W	Spa2	S(1060)	KLASSGEVDKIEsPR	Decreased Phosphorylation in Y128 Xylose -O2/+O2
YLL048C	Ybt1	S(944);S(945)	ANssANLAAK	Decreased Phosphorylation in Y128 Xylose -O2/+O2
YLR025W	Snf7	S(213)	IKQSENsVKDGEEEEDEEDEDEK	Decreased Phosphorylation in Y128 Xylose -O2/+O2
YLR025W	Snf7	S(119)	TIHsGLDIDKVDETMDEIR	Decreased Phosphorylation in Y128 Xylose -O2/+O2
YLR044C	Pdc1	S(251)	GsIDEQHPR	Decreased Phosphorylation in Y128 Xylose -O2/+O2
YLR075W	Rpl10	S(205)	KGsLENNIR	Decreased Phosphorylation in Y128 Xylose -O2/+O2
YLR096W	Kin2	S(803)	LQINDNDNNNVNAVVDGINNDNSDHYLsVPK	Decreased Phosphorylation in Y128 Xylose -O2/+O2
YLR096W	Kin2	S(151)	NEsEILER	Decreased Phosphorylation in Y128 Xylose -O2/+O2
YLR167W	Rps31	S(122)	ECsNPTCGAGVFLANHK	Decreased Phosphorylation in Y128 Xylose -O2/+O2
YLR175W	Cbf5	T(402)	EYVPLDNAEQSTSSSQEtK	Decreased Phosphorylation in Y128 Xylose -O2/+O2
YLR187W	Skg3	S(580)	ITDsNLENMEDVEAK	Decreased Phosphorylation in Y128 Xylose -O2/+O2
YLR196W	Pwp1	Y(122)	GEDPyISLPNQEDSQEEKQELQVYPSDNLVLAAR	Decreased Phosphorylation in Y128 Xylose -O2/+O2
YLR219W	Msc3	S(80)	RLsTSSAAPPTSR	Decreased Phosphorylation in Y128 Xylose -O2/+O2
YLR219W	Msc3	T(174)	TQSItK	Decreased Phosphorylation in Y128 Xylose -O2/+O2
YLR249W	Yef3	Y(638)	AyEELSNTDLEFKFPEPGYLEGVK	Decreased Phosphorylation in Y128 Xylose -O2/+O2
YLR327C	Tma10	S(28)	YFTHNGNFGEsPNHVK	Decreased Phosphorylation in Y128 Xylose -O2/+O2
YLR328W	Nma1	S(95);S(96)	HQHIPLNQDDFQPLSAEVssEDDDADFR	Decreased Phosphorylation in Y128 Xylose -O2/+O2
YLR335W	Nup2	T(585)	SGQTTTNDSKEESTTEATGNESQDAtK	Decreased Phosphorylation in Y128 Xylose -O2/+O2
YLR335W	Nup2	S(84)	VDGTGEAQVDNsPTTESNSR	Decreased Phosphorylation in Y128 Xylose -O2/+O2
YLR337C	Vrp1	S(703);S(709)	sPPPPPsPSTMDTGTSNSPSK	Decreased Phosphorylation in Y128 Xylose -O2/+O2
YML026C	Rps18B	S(43)	RYsNLVCK	Decreased Phosphorylation in Y128 Xylose -O2/+O2
YML034W	Src1	T(289);S(296)	ELGTANGtGHSTPLsK	Decreased Phosphorylation in Y128 Xylose -O2/+O2
YML057W	Cmp2	S(35)	TERPQSSTTPIDsK	Decreased Phosphorylation in Y128 Xylose -O2/+O2
YML063W	Rps1B	S(245)	KVsGFKDEVLETV	Decreased Phosphorylation in Y128 Xylose -O2/+O2
YML069W	Pob3	S(195)	KEESsNEVVPK	Decreased Phosphorylation in Y128 Xylose -O2/+O2
YML093W	Utp14	S(488)	MLDRNsDDEEDGR	Decreased Phosphorylation in Y128 Xylose -O2/+O2
YML100W	Tsl1	S(135)	FFsPSSNIPTDR	Decreased Phosphorylation in Y128 Xylose -O2/+O2
YML100W	Tsl1	S(147)	IAsPIQHEHDSGSR	Decreased Phosphorylation in Y128 Xylose -O2/+O2
YMR014W	Bud22	S(285)	ETTsDNEDLLIK	Decreased Phosphorylation in Y128 Xylose -O2/+O2
YMR058W	Fet3	T(623)	EVNEDRHStEK	Decreased Phosphorylation in Y128 Xylose -O2/+O2
YMR086W	Seg1	S(48)	SAsMTNLR	Decreased Phosphorylation in Y128 Xylose -O2/+O2
YMR086W	Seg1	S(217);S(220)	SNsAHsALNAR	Decreased Phosphorylation in Y128 Xylose -O2/+O2
YMR091C	Npl6	S(86)	HVDEEEDLsEDKGVTR	Decreased Phosphorylation in Y128 Xylose -O2/+O2
YMR221C	Fmp42	S(238)	LIEGDTGsGIIPDEQER	Decreased Phosphorylation in Y128 Xylose -O2/+O2
YMR221C	Fmp42	S(269)	RKsVLETYVEDK	Decreased Phosphorylation in Y128 Xylose -O2/+O2
YMR229C	Rrp5	S(188)	VEDAEYESsDDEDEKLDK	Decreased Phosphorylation in Y128 Xylose -O2/+O2
YMR253C	Ymr253C	S(36);S(38)	sLsPKESNSNEDFNVDGNETTLQR	Decreased Phosphorylation in Y128 Xylose -O2/+O2
YMR266W	Rsn1	S(949)	YKEEEsR	Decreased Phosphorylation in Y128 Xylose -O2/+O2
YMR311C	Glc8	S(158)	KPCQVANDDIDDLsLGEPEFEIK	Decreased Phosphorylation in Y128 Xylose -O2/+O2
YNL015W	Pbi2	T(74)	EKHNDVIENVEEDKEVHtN	Decreased Phosphorylation in Y128 Xylose -O2/+O2
YNL027W	Crz1	T(409);S(410);S(413)	RSSQtsNNsFTSR	Decreased Phosphorylation in Y128 Xylose -O2/+O2
YNL112W	Dbp2	S(88)	DRsDSEIAQFR	Decreased Phosphorylation in Y128 Xylose -O2/+O2
YNL118C	Dcp2	S(606);S(607)	QNssVGMQNK	Decreased Phosphorylation in Y128 Xylose -O2/+O2
YNL132W	Kre33	S(1007)	YAINDNSEEWAEsQK	Decreased Phosphorylation in Y128 Xylose -O2/+O2
YNL151C	Rpc31	S(189)	ELAEDVDDAsTGDGAAK	Decreased Phosphorylation in Y128 Xylose -O2/+O2
YNL154C	Yck2	S(455)	YQLQPDDsHYDEER	Decreased Phosphorylation in Y128 Xylose -O2/+O2
YNL166C	Bni5	S(179)	GEADVETIENNDDEWEDEKsDVEEGR	Decreased Phosphorylation in Y128 Xylose -O2/+O2
YNL166C	Bni5	T(257)	LADQtPHDDNSENCPNR	Decreased Phosphorylation in Y128 Xylose -O2/+O2
YNL166C	Bni5	S(278)	SGGSTPLDsQTK	Decreased Phosphorylation in Y128 Xylose -O2/+O2
YNL166C	Bni5	S(270);S(273)	sGGsTPLDSQTK	Decreased Phosphorylation in Y128 Xylose -O2/+O2
YNL166C	Bni5	S(198)	VDKGTEENSEIEsFK	Decreased Phosphorylation in Y128 Xylose -O2/+O2
YNL175C	Nop13	T(13)	SETELSKEDAVtK	Decreased Phosphorylation in Y128 Xylose -O2/+O2
YNL216W	Rap1	S(142)	DADAHDsLNDIDQLAR	Decreased Phosphorylation in Y128 Xylose -O2/+O2
YNL232W	Csl4	S(94)	SVDAsPNDVTR	Decreased Phosphorylation in Y128 Xylose -O2/+O2
YNL247W	Ynl247W	S(326)	GQLDLINDGEGsLSNFADNGK	Decreased Phosphorylation in Y128 Xylose -O2/+O2
YNL302C	Rps19B	S(125)	RIsENGQR	Decreased Phosphorylation in Y128 Xylose -O2/+O2
YNR013C	Pho91	S(312)	INNDENSsGNEEDEDGNR	Decreased Phosphorylation in Y128 Xylose -O2/+O2
YNR014W	Ynr014W	S(198)	RNsVAVK	Decreased Phosphorylation in Y128 Xylose -O2/+O2
YNR053C	Nog2	S(60)	AAsFQDSTIPDAR	Decreased Phosphorylation in Y128 Xylose -O2/+O2
YNR054C	Esf2	S(47);S(51)	AEDIEsENEsDIEEEQKQEEKEDVEQPDKENGEK	Decreased Phosphorylation in Y128 Xylose -O2/+O2
YOL060C	Mam3	S(637)	DWDESKsEYGNENINQENSNR	Decreased Phosphorylation in Y128 Xylose -O2/+O2
YOL060C	Mam3	S(527)	EPsPAPHSNDK	Decreased Phosphorylation in Y128 Xylose -O2/+O2
YOL060C	Mam3	S(678)	FKNENAsNNDR	Decreased Phosphorylation in Y128 Xylose -O2/+O2
YOL092W	Ypq1	S(202)	IDEEMAAPsSDGNVGDDNLR	Decreased Phosphorylation in Y128 Xylose -O2/+O2
YOL109W	Zeo1	S(40)	EQAEAsIDNLK	Decreased Phosphorylation in Y128 Xylose -O2/+O2
YOL109W	Zeo1	S(40);T(49)	EQAEAsIDNLKNEAtPEAEQVK	Decreased Phosphorylation in Y128 Xylose -O2/+O2
YOL109W	Zeo1	S(25)	LEETKEsLQNK	Decreased Phosphorylation in Y128 Xylose -O2/+O2
YOL123W	Hrp1	S(2);S(3)	MssDEEDFNDIYGDDKPTTTEEVK	Decreased Phosphorylation in Y128 Xylose -O2/+O2
YOL139C	Cdc33	S(15)	FEENVsVDDTTATPK	Decreased Phosphorylation in Y128 Xylose -O2/+O2
YOL144W	Nop8	S(229);S(234)	DENVCsGEMDsDENMSEEEKEK	Decreased Phosphorylation in Y128 Xylose -O2/+O2
YOL144W	Nop8	S(229);S(239)	DENVCsGEMDSDENMsEEEKEK	Decreased Phosphorylation in Y128 Xylose -O2/+O2
YOR014W	Rts1	S(234);S(236)	SsHsFER	Decreased Phosphorylation in Y128 Xylose -O2/+O2
YOR018W	Rod1	S(617)	RNsYSR	Decreased Phosphorylation in Y128 Xylose -O2/+O2
YOR028C	Cin5	S(196)	KNsATTNLPSEER	Decreased Phosphorylation in Y128 Xylose -O2/+O2
YOR052C	Tmc1	S(43)	KSDsGTVLGAIPLNSR	Decreased Phosphorylation in Y128 Xylose -O2/+O2
YOR173W	Dcs2	S(59);S(61)	RPsQsGRSTPIFFHR	Decreased Phosphorylation in Y128 Xylose -O2/+O2
YOR204W	Ded1	S(553);S(557)	DAMMsAPGsR	Decreased Phosphorylation in Y128 Xylose -O2/+O2
YOR204W	Ded1	S(557)	DAMMSAPGsR	Decreased Phosphorylation in Y128 Xylose -O2/+O2
YOR204W	Ded1	S(553)	DAMMsAPGSR	Decreased Phosphorylation in Y128 Xylose -O2/+O2
YOR204W	Ded1	S(594)	SRDNsFR	Decreased Phosphorylation in Y128 Xylose -O2/+O2
YOR206W	Noc2	S(166)	NSNIEEKsEQMELEK	Decreased Phosphorylation in Y128 Xylose -O2/+O2
YOR260W	Gcd1	S(296)	LGPQSMsR	Decreased Phosphorylation in Y128 Xylose -O2/+O2
YOR290C	Snf2	T(1414)	SEAIDGNGEIKGENIDtDNDGPR	Decreased Phosphorylation in Y128 Xylose -O2/+O2
YOR310C	Nop58	S(470)	KRDDDEDSKDsK	Decreased Phosphorylation in Y128 Xylose -O2/+O2
YOR335C	Ala1	S(888)	SIYLLAGNDsEGR	Decreased Phosphorylation in Y128 Xylose -O2/+O2
YOR340C	Rpa43	S(285)	IVFDDEVsIENK	Decreased Phosphorylation in Y128 Xylose -O2/+O2
YPL037C	Egd1	T(151)	APADAEKKDEAIPELVEGQtFDADVE	Decreased Phosphorylation in Y128 Xylose -O2/+O2
YPL043W	Nop4	S(247)	AQPEMNDKDDNEsGNEDAEENHDDEEDENEEEDR	Decreased Phosphorylation in Y128 Xylose -O2/+O2
YPL070W	Muk1	S(538)	DTTEMsR	Decreased Phosphorylation in Y128 Xylose -O2/+O2
YPL090C	Rps6A	T(163)	REVtKGEK	Decreased Phosphorylation in Y128 Xylose -O2/+O2
YPL116W	Hos3	S(530)	sNASPEKELHENKPR	Decreased Phosphorylation in Y128 Xylose -O2/+O2
YPL190C	Nab3	T(178)	REtLEK	Decreased Phosphorylation in Y128 Xylose -O2/+O2
YPL217C	Bms1	S(578)	GEDDDSKDEsDIEEDVDDDFFR	Decreased Phosphorylation in Y128 Xylose -O2/+O2
YPL217C	Bms1	S(574)	WRGEDDDsKDESDIEEDVDDDFFR	Decreased Phosphorylation in Y128 Xylose -O2/+O2
YPL226W	New1	T(1191)	GTPKPVDtDDEED	Decreased Phosphorylation in Y128 Xylose -O2/+O2
YPL242C	Iqg1	S(16)	TAYSGSPSKPGNNNsYLNR	Decreased Phosphorylation in Y128 Xylose -O2/+O2
YPR018W	Rlf2	S(98)	NSPIQsTK	Decreased Phosphorylation in Y128 Xylose -O2/+O2
YPR041W	Tif5	S(189);S(190);T(191)	SQNAPSDGTGsstPQHHDEDEDELSR	Decreased Phosphorylation in Y128 Xylose -O2/+O2
YPR129W	Scd6	S(165)	STPQDTNVNSQsR	Decreased Phosphorylation in Y128 Xylose -O2/+O2
YPR163C	Tif3	S(71)	SGGFGGsFGGR	Decreased Phosphorylation in Y128 Xylose -O2/+O2

## Sheet: 6-3) ClassB Phosphopeptides
Table S6-3) Phosphopeptides showing an increase or decrease in Y128 compared to both Y22-3 and Y127 in ratio value of xylose -O2/+O2 with little change between Y22-3 and Y127.
Column Descriptions:
Column 1	Systematic name for each yeast protein.
Column 2	Protein name for each yeast protein.
Column 3	Phosphosite(s) location on each protein
Column 4	Peptide containing phosphosite (lowercased letter)
Column 5	Directionality of phosphorylation change in Y128 relative to Y22-3/Y127
1	2	3	4	5
Systematic Name	Protein Name	Phosphosite(s)	Peptide	Direction of Phosphorylation Abundance Change
YBL051C	Pin4	S(638)	SLsHSGLDDGLEQGLNR	Increased Phosphorylation in Y128 Xylose -O2/+O2
YBL085W	Boi1	S(203);S(209)	sNISTKsLEPSSESVR	Increased Phosphorylation in Y128 Xylose -O2/+O2
YBR150C	Tbs1	S(212)	sASDKEDTWPDFVPIDR	Increased Phosphorylation in Y128 Xylose -O2/+O2
YBR235W	Vhc1	S(870)	RFsTIEPQTIAK	Increased Phosphorylation in Y128 Xylose -O2/+O2
YBR279W	Paf1	S(147)	LDDGDsDDENLDVNHIISR	Increased Phosphorylation in Y128 Xylose -O2/+O2
YCL014W	Bud3	S(1153)	TNEDASTLTQKLSPQAsK	Increased Phosphorylation in Y128 Xylose -O2/+O2
YCR048W	Are1	S(29);S(45)	HsVTYDNVILPQESMEVsPR	Increased Phosphorylation in Y128 Xylose -O2/+O2
YCR048W	Are1	S(48)	sSTTSLVEPVESSEAER	Increased Phosphorylation in Y128 Xylose -O2/+O2
YCR073W-A	Sol2	S(42)	KHsVPNISMNALDMTR	Increased Phosphorylation in Y128 Xylose -O2/+O2
YDL019C	Osh2	S(451)	RPsNNLSVVSSEIQLNDNLTESGK	Increased Phosphorylation in Y128 Xylose -O2/+O2
YDL133W	Srf1	S(43)	KsGSLEALQNAK	Increased Phosphorylation in Y128 Xylose -O2/+O2
YDL195W	Sec31	S(349)	QQEsETDFWNNVSR	Increased Phosphorylation in Y128 Xylose -O2/+O2
YDL225W	Shs1	S(548)	KNDTYTDLASIAsGRD	Increased Phosphorylation in Y128 Xylose -O2/+O2
YDL225W	Shs1	S(545);S(548)	KNDTYTDLAsIAsGRD	Increased Phosphorylation in Y128 Xylose -O2/+O2
YDL225W	Shs1	S(521);S(525)	LNGSSsSINsLQQSTR	Increased Phosphorylation in Y128 Xylose -O2/+O2
YDR060W	Mak21	S(878)	ASNFDsDDEMDENEIWSALVK	Increased Phosphorylation in Y128 Xylose -O2/+O2
YDR088C	Slu7	T(212)	DKSQTDETLWDtDEEIELMK	Increased Phosphorylation in Y128 Xylose -O2/+O2
YDR093W	Dnf2	S(397);S(404)	MsADFGRPsLDYENLNQTMSQANR	Increased Phosphorylation in Y128 Xylose -O2/+O2
YDR093W	Dnf2	S(1593)	ARAsLDLPGINHAETLLSQR	Increased Phosphorylation in Y128 Xylose -O2/+O2
YDR096W	Gis1	S(694);S(696)	EAsKsPISSFVNDYR	Increased Phosphorylation in Y128 Xylose -O2/+O2
YDR096W	Gis1	S(696)	EASKsPISSFVNDYR	Increased Phosphorylation in Y128 Xylose -O2/+O2
YDR217C	Rad9	S(26)	EALHsPLADGDMNEMNVPVDPLENK	Increased Phosphorylation in Y128 Xylose -O2/+O2
YDR251W	Pam1	S(661)	LNSLsNQSTFR	Increased Phosphorylation in Y128 Xylose -O2/+O2
YDR338C	Ydr338C	S(113)	VSETPELsPQDVDWILHEHER	Increased Phosphorylation in Y128 Xylose -O2/+O2
YDR379W	Rga2	T(589)	SSSLQtSR	Increased Phosphorylation in Y128 Xylose -O2/+O2
YDR389W	Sac7	S(46);T(48)	SMSSENITVPRsPtSLSR	Increased Phosphorylation in Y128 Xylose -O2/+O2
YDR432W	Npl3	S(224)	ENsLETTFSSVNTR	Increased Phosphorylation in Y128 Xylose -O2/+O2
YDR505C	Psp1	T(334)	RNtQPVASFNPSLPTFQQQQQQPQQPQQPR	Increased Phosphorylation in Y128 Xylose -O2/+O2
YEL046C	Gly1	S(369)	SEsTEVDVDGNAIR	Increased Phosphorylation in Y128 Xylose -O2/+O2
YER114C	Boi2	S(375)	KTSQsLEDLPSQQNFIPTPR	Increased Phosphorylation in Y128 Xylose -O2/+O2
YER166W	Dnf1	S(1545)	EQMIATNQLDNRYsVER	Increased Phosphorylation in Y128 Xylose -O2/+O2
YFL042C	Lam5	S(103)	SNVPsPVSR	Increased Phosphorylation in Y128 Xylose -O2/+O2
YFR003C	Ypi1	S(22)	TVsVEEVPAVLQLR	Increased Phosphorylation in Y128 Xylose -O2/+O2
YFR014C	Cmk1	S(417);S(425)	VCsSDSDLPGsDKK	Increased Phosphorylation in Y128 Xylose -O2/+O2
YFR024C-A	Lsb3	S(300)	LAPTNsGGSGGKLDDPSGASSYYASHR	Increased Phosphorylation in Y128 Xylose -O2/+O2
YFR053C	Hxk1	S(262)	LADDIPSNsPMAINCEYGSFDNEHLVLPR	Increased Phosphorylation in Y128 Xylose -O2/+O2
YGL008C	Pma1	S(899);S(911)	sVEDFMAAMQRVsTQHEK	Increased Phosphorylation in Y128 Xylose -O2/+O2
YGL035C	Mig1	S(311)	RPSsVLSLNDLLVGQR	Increased Phosphorylation in Y128 Xylose -O2/+O2
YGL253W	Hxk2	S(15)	KGsMADVPKELMQQIENFEK	Increased Phosphorylation in Y128 Xylose -O2/+O2
YGR010W	Nma2	S(85)	MDHIPLNTSDFQPLsR	Increased Phosphorylation in Y128 Xylose -O2/+O2
YGR116W	Spt6	S(94)	EEDDRLsEDDLDLLMENAGVER	Increased Phosphorylation in Y128 Xylose -O2/+O2
YGR116W	Spt6	S(206)	TADKGGILDELDDFIEDDEFsDEDDETR	Increased Phosphorylation in Y128 Xylose -O2/+O2
YGR134W	Caf130	S(1121)	ADKPIPLHEYITLAELDVGDsE	Increased Phosphorylation in Y128 Xylose -O2/+O2
YHR098C	Sfb3	S(101)	FGAsEASSPYGQSMLDMTAPQPTSHIVPTQR	Increased Phosphorylation in Y128 Xylose -O2/+O2
YHR098C	Sfb3	T(72)	AYHNFSSGTVPTLGNSPYTTPQLNQQDGFQQPQAFtPK	Increased Phosphorylation in Y128 Xylose -O2/+O2
YHR158C	Kel1	S(848)	CEILEADNHsLEDKVNELEELVNCK	Increased Phosphorylation in Y128 Xylose -O2/+O2
YIL033C	Bcy1	T(131)	EKTStPPLPMHFNAQR	Increased Phosphorylation in Y128 Xylose -O2/+O2
YIL038C	Not3	S(450)	IGsALNTPK	Increased Phosphorylation in Y128 Xylose -O2/+O2
YIL126W	Sth1	S(51)	sSAQLEQLLYR	Increased Phosphorylation in Y128 Xylose -O2/+O2
YIL135C	Vhs2	S(159);T(160)	RPstIGLDR	Increased Phosphorylation in Y128 Xylose -O2/+O2
YIR003W	Aim21	S(576)	EQsPNKMEAALCPFELDEK	Increased Phosphorylation in Y128 Xylose -O2/+O2
YIR003W	Aim21	S(678)	ELSGGYEDVDSALHSEEASFHsL	Increased Phosphorylation in Y128 Xylose -O2/+O2
YIR007W	Egh1	T(594);T(596)	ARtPtPEPSPASTVASVSTSTSK	Increased Phosphorylation in Y128 Xylose -O2/+O2
YJL042W	Mhp1	S(174);S(176)	ERsPsPTHVDR	Increased Phosphorylation in Y128 Xylose -O2/+O2
YKL038W	Rgt1	S(410)	RQsAPVSVTLSMDR	Increased Phosphorylation in Y128 Xylose -O2/+O2
YKL042W	Spc42	S(213);S(217);S(223)	SEDGNNDRMsPLPsPLNTIsPINNR	Increased Phosphorylation in Y128 Xylose -O2/+O2
YKL042W	Spc42	S(213)	SEDGNNDRMsPLPSPLNTISPINNR	Increased Phosphorylation in Y128 Xylose -O2/+O2
YKL042W	Spc42	S(294)	KLSLNNQLQELQsMMDGDDNIK	Increased Phosphorylation in Y128 Xylose -O2/+O2
YKL105C	Seg2	S(562)	EDQEEALSDNEPEsFEK	Increased Phosphorylation in Y128 Xylose -O2/+O2
YKL116C	Prr1	S(132)	VVSELIAPANLsPQR	Increased Phosphorylation in Y128 Xylose -O2/+O2
YLL021W	Spa2	S(599)	AINsPIIRPSSSNGVPTTSR	Increased Phosphorylation in Y128 Xylose -O2/+O2
YLL022C	Hif1	S(174)	LALHELANFsPANEHDDEIEDVSQLR	Increased Phosphorylation in Y128 Xylose -O2/+O2
YLL040C	Vps13	S(1364)	SPsPDPASFSSESER	Increased Phosphorylation in Y128 Xylose -O2/+O2
YLR098C	Cha4	S(123)	NNsDHGDAPNEK	Increased Phosphorylation in Y128 Xylose -O2/+O2
YLR114C	Avl9	S(516)	NGHQSEEDIKDQESIEsK	Increased Phosphorylation in Y128 Xylose -O2/+O2
YLR133W	Cki1	T(54)	TISIESDVSNItDDDDLR	Increased Phosphorylation in Y128 Xylose -O2/+O2
YLR149C	Ylr149C	S(651)	AFESFLRPPSTPDLPsDDDNFAANSR	Increased Phosphorylation in Y128 Xylose -O2/+O2
YLR187W	Skg3	S(709)	NEDLGSLKEFEELsQK	Increased Phosphorylation in Y128 Xylose -O2/+O2
YLR223C	Ifh1	S(511)	TTSNVDNDEYIFNVFFQSDDENsGHK	Increased Phosphorylation in Y128 Xylose -O2/+O2
YLR314C	Cdc3	S(509);T(513)	QLELSINSASPNVNHsPVPtK	Increased Phosphorylation in Y128 Xylose -O2/+O2
YLR323C	Cwc24	S(105)	RPsDDNELVLNMSGK	Increased Phosphorylation in Y128 Xylose -O2/+O2
YLR335W	Nup2	S(205)	KKDESDsENDIEIKGPEFK	Increased Phosphorylation in Y128 Xylose -O2/+O2
YLR429W	Crn1	T(581)	SATPPSSItAAK	Increased Phosphorylation in Y128 Xylose -O2/+O2
YML016C	Ppz1	Y(165)	SSYSSTyYENALTDDDNDDKDNDISHTK	Increased Phosphorylation in Y128 Xylose -O2/+O2
YML123C	Pho84	T(317);S(321)	AStAVEsLDNHPPK	Increased Phosphorylation in Y128 Xylose -O2/+O2
YMR037C	Msn2	S(289)	RFsDVITNQFPSMTNSR	Increased Phosphorylation in Y128 Xylose -O2/+O2
YMR054W	Stv1	S(223)	NQsVEDLSFLEQGYQHR	Increased Phosphorylation in Y128 Xylose -O2/+O2
YMR086W	Seg1	S(360)	EKPLNSDQEDVFIsEK	Increased Phosphorylation in Y128 Xylose -O2/+O2
YMR109W	Myo5	Y(359)	RGSVyHVPLNIVQADAVR	Increased Phosphorylation in Y128 Xylose -O2/+O2
YMR139W	Rim11	S(198)	QLKPTEPNVsYICSR	Increased Phosphorylation in Y128 Xylose -O2/+O2
YMR205C	Pfk2	S(163);S(167)	sGLSsEVHSYTDLAYR	Increased Phosphorylation in Y128 Xylose -O2/+O2
YNL209W	Ssb2	T(47)	VTPSFVAFtPEER	Increased Phosphorylation in Y128 Xylose -O2/+O2
YNL225C	Cnm67	T(121)	DVPNFIHStPR	Increased Phosphorylation in Y128 Xylose -O2/+O2
YNL225C	Cnm67	S(17);S(20)	LDsPVsENGEIKDGEPIPQNWLNENHVGK	Increased Phosphorylation in Y128 Xylose -O2/+O2
YNL243W	Sla2	T(294);S(308)	TPARtPTPTPPVVAEPAIsPRPVSQR	Increased Phosphorylation in Y128 Xylose -O2/+O2
YNL307C	Mck1	Y(199)	KLEHNQPSISyICSR	Increased Phosphorylation in Y128 Xylose -O2/+O2
YNR012W	Urk1	S(14)	SSsFISILDDETR	Increased Phosphorylation in Y128 Xylose -O2/+O2
YNR016C	Acc1	S(1157)	AVsVSDLSYVANSQSSPLR	Increased Phosphorylation in Y128 Xylose -O2/+O2
YNR051C	Bre5	S(293)	EGSVEAINAVNNSsLPNGK	Increased Phosphorylation in Y128 Xylose -O2/+O2
YOL051W	Gal11	S(798);T(808)	KLsISNAASQQPtPR	Increased Phosphorylation in Y128 Xylose -O2/+O2
YOL054W	Psh1	S(251)	sIAVDAVDDEDDEEEDEEEEEEMDSDLKDFIEDDEDDEDEDGSRR	Increased Phosphorylation in Y128 Xylose -O2/+O2
YOL054W	Psh1	S(143)	NSALAVADDsDDGITR	Increased Phosphorylation in Y128 Xylose -O2/+O2
YOL078W	Avo1	S(433)	SNsNEFNAQNR	Increased Phosphorylation in Y128 Xylose -O2/+O2
YOR052C	Tmc1	S(60)	SSSNsSVTSTGQSSR	Increased Phosphorylation in Y128 Xylose -O2/+O2
YOR083W	Whi5	T(215)	TLPELETELAPAVQtPPRR	Increased Phosphorylation in Y128 Xylose -O2/+O2
YOR123C	Leo1	Y(124)	FyGEDANNFSDQDETTHTFK	Increased Phosphorylation in Y128 Xylose -O2/+O2
YOR148C	Spp2	S(123)	GMGWESDSEQDsK	Increased Phosphorylation in Y128 Xylose -O2/+O2
YOR276W	Caf20	T(83)	VTTDSDGWCtFEAK	Increased Phosphorylation in Y128 Xylose -O2/+O2
YOR329C	Scd5	S(564)	IEPSNIsPQHTYSNNVR	Increased Phosphorylation in Y128 Xylose -O2/+O2
YOR370C	Mrs6	S(464)	ESSSGLENDEEIVQLTGNGHTIVNsVK	Increased Phosphorylation in Y128 Xylose -O2/+O2
YPL049C	Dig1	S(339)	STsTSTSTSTSTSTNR	Increased Phosphorylation in Y128 Xylose -O2/+O2
YPL054W	Lee1	T(274)	tGPAIQEESDNEIEDLLIHNFNSR	Increased Phosphorylation in Y128 Xylose -O2/+O2
YPL057C	Sur1	T(351)	KDSNtNIVLLK	Increased Phosphorylation in Y128 Xylose -O2/+O2
YPL081W	Rps9A	S(162)	HIDFAPTsPFGGARPGR	Increased Phosphorylation in Y128 Xylose -O2/+O2
YPL085W	Sec16	Y(777)	HATQyGLNNGVPPVSPYGQATINLPTANK	Increased Phosphorylation in Y128 Xylose -O2/+O2
YPL120W	Vps30	S(154)	DHDEEEQEATDEDENQQIQLNsK	Increased Phosphorylation in Y128 Xylose -O2/+O2
YPR160W	Gph1	T(31)	RLtGFLPQEIK	Increased Phosphorylation in Y128 Xylose -O2/+O2
YPR185W	Atg13	S(580)	RNsLDK	Increased Phosphorylation in Y128 Xylose -O2/+O2
YAL005C	Ssa1	S(415)	NsTIPTKK	Decreased Phosphorylation in Y128 Xylose -O2/+O2
YAL023C	Pmt2	S(38);S(39)	ESSSISVSEELssADER	Decreased Phosphorylation in Y128 Xylose -O2/+O2
YAR002W	Nup60	S(10)	RAsATVPSAPYR	Decreased Phosphorylation in Y128 Xylose -O2/+O2
YBL047C	Ede1	Y(1173)	yPAPGTSPSHNEGNSK	Decreased Phosphorylation in Y128 Xylose -O2/+O2
YBL061C	Skt5	T(624)	TGSDtSIR	Decreased Phosphorylation in Y128 Xylose -O2/+O2
YBL061C	Skt5	T(138)	QTNSSTSLtK	Decreased Phosphorylation in Y128 Xylose -O2/+O2
YBL075C	Ssa3	S(415)	NsTIPTKK	Decreased Phosphorylation in Y128 Xylose -O2/+O2
YBL101C	Ecm21	S(33)	GQPFQPsPTKK	Decreased Phosphorylation in Y128 Xylose -O2/+O2
YBR054W	Yro2	T(341);S(343)	AQEEEEDVAtDsE	Decreased Phosphorylation in Y128 Xylose -O2/+O2
YBR086C	Ist2	S(704)	AVDNDTAGsAGK	Decreased Phosphorylation in Y128 Xylose -O2/+O2
YBR095C	Rxt2	S(249)	GAsDEDDINNK	Decreased Phosphorylation in Y128 Xylose -O2/+O2
YBR108W	Aim3	S(58);S(64)	KNSsDEEYDsEDEMEYER	Decreased Phosphorylation in Y128 Xylose -O2/+O2
YBR114W	Rad16	S(25)	SVNYNELsDDDTAVK	Decreased Phosphorylation in Y128 Xylose -O2/+O2
YBR127C	Vma2	S(515)	KDASQEEsLI	Decreased Phosphorylation in Y128 Xylose -O2/+O2
YBR198C	Taf5	S(411);S(415)	KDsNLSsPAR	Decreased Phosphorylation in Y128 Xylose -O2/+O2
YBR207W	Fth1	T(120)	DQDRESDEHtADNVK	Decreased Phosphorylation in Y128 Xylose -O2/+O2
YCL011C	Gbp2	S(24)	RLsDDRDR	Decreased Phosphorylation in Y128 Xylose -O2/+O2
YCL014W	Bud3	T(1166)	VLTENSNELKDtNNEGK	Decreased Phosphorylation in Y128 Xylose -O2/+O2
YCL054W	Spb1	T(499)	GGDNEEEWtGFNEGSLEK	Decreased Phosphorylation in Y128 Xylose -O2/+O2
YCL054W	Spb1	S(765)	AGLINDDsDKTEK	Decreased Phosphorylation in Y128 Xylose -O2/+O2
YCL069W	Vba3	S(18);S(21)	YSSQQEIEEACGsDVsLNAR	Decreased Phosphorylation in Y128 Xylose -O2/+O2
YCR021C	Hsp30	S(308)	EAVPEsPR	Decreased Phosphorylation in Y128 Xylose -O2/+O2
YCR023C	Ycr023C	S(313)	RQsVGLIR	Decreased Phosphorylation in Y128 Xylose -O2/+O2
YCR034W	Elo2	T(334);S(336);S(338)	NVPtPsPsPKPQHR	Decreased Phosphorylation in Y128 Xylose -O2/+O2
YCR057C	Pwp2	S(907);S(913)	DNKLPLsNENDFsDEEEDEKELP	Decreased Phosphorylation in Y128 Xylose -O2/+O2
YCR091W	Kin82	S(203);S(206)	NLsNGsLNDINENEELQNFHR	Decreased Phosphorylation in Y128 Xylose -O2/+O2
YDL019C	Osh2	T(1161)	TAASAGNGPTDDGtK	Decreased Phosphorylation in Y128 Xylose -O2/+O2
YDL031W	Dbp10	S(398);S(400)	LQNSNNEADsDsDDENDR	Decreased Phosphorylation in Y128 Xylose -O2/+O2
YDL081C	Rpp1A	S(96)	DLLVNFSAGAAAPAGVAGGVAGGEAGEAEAEKEEEEAKEEsDDDMGFGLFD	Decreased Phosphorylation in Y128 Xylose -O2/+O2
YDL117W	Cyk3	S(209)	SYsANDLHMAR	Decreased Phosphorylation in Y128 Xylose -O2/+O2
YDL122W	Ubp1	S(638)	DNEELQEIDNVsLDEPK	Decreased Phosphorylation in Y128 Xylose -O2/+O2
YDL150W	Rpc53	S(224)	EIQEALsEKPTR	Decreased Phosphorylation in Y128 Xylose -O2/+O2
YDL222C	Fmp45	S(290)	KQVPsAELEPAGDGGLAGPVTVRD	Decreased Phosphorylation in Y128 Xylose -O2/+O2
YDL223C	Hbt1	S(33)	DGQGEEEQNNFSFGGKPGSYDSNsDSAQR	Decreased Phosphorylation in Y128 Xylose -O2/+O2
YDL223C	Hbt1	S(303)	GYSNTDSNsDRDVIPGNFR	Decreased Phosphorylation in Y128 Xylose -O2/+O2
YDR054C	Cdc34	S(263)	IEFEDDDDDDDDsIDNDSVMDR	Decreased Phosphorylation in Y128 Xylose -O2/+O2
YDR060W	Mak21	S(710)	NLLTNTPVDYEYEsDAEEEQR	Decreased Phosphorylation in Y128 Xylose -O2/+O2
YDR083W	Rrp8	S(81)	EQVEDIPsEGSVAK	Decreased Phosphorylation in Y128 Xylose -O2/+O2
YDR122W	Kin1	S(521)	QsHENIEK	Decreased Phosphorylation in Y128 Xylose -O2/+O2
YDR170C	Sec7	T(71)	ETSNDAtNGMKTPEETEDTNDKR	Decreased Phosphorylation in Y128 Xylose -O2/+O2
YDR170C	Sec7	T(83)	ETSNDATNGMKTPEETEDtNDK	Decreased Phosphorylation in Y128 Xylose -O2/+O2
YDR226W	Adk1	S(140)	LIHPAsGR	Decreased Phosphorylation in Y128 Xylose -O2/+O2
YDR299W	Bfr2	S(383)	DSVDDNENsDDGLDIPK	Decreased Phosphorylation in Y128 Xylose -O2/+O2
YDR320C	Swa2	S(264)	THDKVEDYDLPQVNDsPDR	Decreased Phosphorylation in Y128 Xylose -O2/+O2
YDR365C	Esf1	T(220);S(225)	KKtDDSDsDMDIGIK	Decreased Phosphorylation in Y128 Xylose -O2/+O2
YER105C	Nup157	S(521)	ANSGELsK	Decreased Phosphorylation in Y128 Xylose -O2/+O2
YER159C	Bur6	S(141)	EGLCVEEGQAQPEEEsA	Decreased Phosphorylation in Y128 Xylose -O2/+O2
YER178W	Pda1	S(336)	YGGHsMSDPGTTYR	Decreased Phosphorylation in Y128 Xylose -O2/+O2
YFL014W	Hsp12	S(59)	GVFQGVHDsAEK	Decreased Phosphorylation in Y128 Xylose -O2/+O2
YFR017C	Igd1	S(83)	ERESsIGEHAPGAER	Decreased Phosphorylation in Y128 Xylose -O2/+O2
YFR034C	Pho4	Y(154)	SNSSPyLNK	Decreased Phosphorylation in Y128 Xylose -O2/+O2
YGL008C	Pma1	T(647)	KADtGIAVEGATDAAR	Decreased Phosphorylation in Y128 Xylose -O2/+O2
YGL139W	Flc3	Y(637)	DHDDNSDyESNDTGVNDELK	Decreased Phosphorylation in Y128 Xylose -O2/+O2
YGL232W	Tan1	S(72)	EGEDEsENDEKK	Decreased Phosphorylation in Y128 Xylose -O2/+O2
YGR086C	Pil1	S(59)	KLsQLVK	Decreased Phosphorylation in Y128 Xylose -O2/+O2
YGR090W	Utp22	S(10)	KAsETSDQNIVK	Decreased Phosphorylation in Y128 Xylose -O2/+O2
YGR116W	Spt6	S(148)	QDSTsKLEDFFSEDEEEEESGLR	Decreased Phosphorylation in Y128 Xylose -O2/+O2
YGR116W	Spt6	S(148);S(155)	QDSTsKLEDFFsEDEEEEESGLR	Decreased Phosphorylation in Y128 Xylose -O2/+O2
YGR130C	Ygr130C	S(255)	GTADsAQINVAEPISSENGVLEPR	Decreased Phosphorylation in Y128 Xylose -O2/+O2
YGR240C	Pfk1	T(898)	KNEASPNtDAK	Decreased Phosphorylation in Y128 Xylose -O2/+O2
YGR270W	Yta7	S(259)	ELQEDsPIR	Decreased Phosphorylation in Y128 Xylose -O2/+O2
YGR270W	Yta7	S(94)	GDDEDDDVDLVsPHENAR	Decreased Phosphorylation in Y128 Xylose -O2/+O2
YGR270W	Yta7	T(212)	HPEtPPPVR	Decreased Phosphorylation in Y128 Xylose -O2/+O2
YGR271C-A	Ygr272C	S(193);S(211)	KLDEDsIGLTLSPDKDHEDGSQVsPTQDR	Decreased Phosphorylation in Y128 Xylose -O2/+O2
YGR272C	Ygr272C	S(193);S(211)	KLDEDsIGLTLSPDKDHEDGSQVsPTQDR	Decreased Phosphorylation in Y128 Xylose -O2/+O2
YHR027C	Rpn1	S(16)	QQTIDEQsQISPEK	Decreased Phosphorylation in Y128 Xylose -O2/+O2
YHR066W	Ssf1	T(301)	EKEtEEEEDVEMEEPKPSENLQPTPR	Decreased Phosphorylation in Y128 Xylose -O2/+O2
YIL041W	Gvp36	S(146)	VALNSsECLNK	Decreased Phosphorylation in Y128 Xylose -O2/+O2
YIL078W	Ths1	S(289)	NSsCYFLGDATNDSLQR	Decreased Phosphorylation in Y128 Xylose -O2/+O2
YIR006C	Pan1	T(1169)	KQIEDAQNESDEEEtNGK	Decreased Phosphorylation in Y128 Xylose -O2/+O2
YJL076W	Net1	S(231)	IVSNNsDDEDEDIGER	Decreased Phosphorylation in Y128 Xylose -O2/+O2
YJL080C	Scp160	T(50);S(54)	KPtPLPsLK	Decreased Phosphorylation in Y128 Xylose -O2/+O2
YJL128C	Pbs2	S(71);S(74)	SASVGsNQsEQDK	Decreased Phosphorylation in Y128 Xylose -O2/+O2
YJL138C	Tif2	T(146)	DAQIVVGtPGR	Decreased Phosphorylation in Y128 Xylose -O2/+O2
YJR059W	Ptk2	S(104)	sSAALQDLIK	Decreased Phosphorylation in Y128 Xylose -O2/+O2
YKL060C	Fba1	S(83)	GISNEGQNAsIK	Decreased Phosphorylation in Y128 Xylose -O2/+O2
YKL092C	Bud2	S(854)	DLDsPIEVKPEIGELEFEK	Decreased Phosphorylation in Y128 Xylose -O2/+O2
YKL172W	Ebp2	S(104);S(110)	HMsGDEDEsGDDREEEEEEEEEEEEEEGR	Decreased Phosphorylation in Y128 Xylose -O2/+O2
YKR029C	Set3	S(680)	NEHKLsR	Decreased Phosphorylation in Y128 Xylose -O2/+O2
YKR048C	Nap1	S(140)	IIsGQEQPKPEQIAK	Decreased Phosphorylation in Y128 Xylose -O2/+O2
YKR048C	Nap1	S(177)	AQNDsEEEQVK	Decreased Phosphorylation in Y128 Xylose -O2/+O2
YKR059W	Tif1	T(146)	DAQIVVGtPGR	Decreased Phosphorylation in Y128 Xylose -O2/+O2
YKR062W	Tfa2	S(96);S(97)	EAGSNSSNAISLDDDDDDEDFGssPSKK	Decreased Phosphorylation in Y128 Xylose -O2/+O2
YKR089C	Tgl4	S(733)	RKsDTISTSR	Decreased Phosphorylation in Y128 Xylose -O2/+O2
YKR100C	Skg1	S(216)	QSsNENLIR	Decreased Phosphorylation in Y128 Xylose -O2/+O2
YLL008W	Drs1	S(210)	GGKDDEIDEEDDsEEAK	Decreased Phosphorylation in Y128 Xylose -O2/+O2
YLL010C	Psr1	S(110)	RIsKDDLYEEK	Decreased Phosphorylation in Y128 Xylose -O2/+O2
YLL021W	Spa2	S(254)	NYWDVNDsPIIK	Decreased Phosphorylation in Y128 Xylose -O2/+O2
YLL029W	Fra1	S(56)	RAsLFLR	Decreased Phosphorylation in Y128 Xylose -O2/+O2
YLR002C	Noc3	S(105);S(108);S(109)	AQEKPKDDDEEDEDsNDssEDDEGPNEEQEAEAK	Decreased Phosphorylation in Y128 Xylose -O2/+O2
YLR003C	Cms1	S(59)	EERNsEDDSNRPVSK	Decreased Phosphorylation in Y128 Xylose -O2/+O2
YLR005W	Ssl1	S(7);S(9)	APVVIsEsEEDEDR	Decreased Phosphorylation in Y128 Xylose -O2/+O2
YLR006C	Ssk1	S(195);Y(197)	FASVsPyPK	Decreased Phosphorylation in Y128 Xylose -O2/+O2
YLR044C	Pdc1	S(526)	LTQDKsFNDNSK	Decreased Phosphorylation in Y128 Xylose -O2/+O2
YLR106C	Mdn1	S(4555)	ELVEDADDEKMDIDEEEMLsDIDAHDANNDVDSK	Decreased Phosphorylation in Y128 Xylose -O2/+O2
YLR138W	Nha1	S(568)	sKNEMYDDDELNDLGR	Decreased Phosphorylation in Y128 Xylose -O2/+O2
YLR219W	Msc3	S(127)	MNsMTSGANVR	Decreased Phosphorylation in Y128 Xylose -O2/+O2
YLR258W	Gsy2	S(651)	VARPLsVPGSPR	Decreased Phosphorylation in Y128 Xylose -O2/+O2
YLR323C	Cwc24	S(33)	LVAsDEEK	Decreased Phosphorylation in Y128 Xylose -O2/+O2
YLR324W	Pex30	S(52)	NEAESGVSEDNDNGsLEK	Decreased Phosphorylation in Y128 Xylose -O2/+O2
YLR328W	Nma1	S(26)	APDFKPPSADEELIPPPDPEsK	Decreased Phosphorylation in Y128 Xylose -O2/+O2
YLR371W	Rom2	S(76)	RRsGVEAAIDDSDIPNNEMK	Decreased Phosphorylation in Y128 Xylose -O2/+O2
YLR429W	Crn1	T(520)	IETPVtPTETK	Decreased Phosphorylation in Y128 Xylose -O2/+O2
YLR449W	Fpr4	S(80);S(82)	GEYYNQDNNDGLEEDEsEsEQEADVPKR	Decreased Phosphorylation in Y128 Xylose -O2/+O2
YML006C	Gis4	S(165);S(171)	AsNGKLEsNVSDDQWSNINTQTSTATR	Decreased Phosphorylation in Y128 Xylose -O2/+O2
YML074C	Fpr3	S(80);S(81)	RNPDFEDDDFLGGDFDEDEIDEEssEEEEEEK	Decreased Phosphorylation in Y128 Xylose -O2/+O2
YML093W	Utp14	S(34);S(35)	EINGEFDNssDNDKR	Decreased Phosphorylation in Y128 Xylose -O2/+O2
YMR031C	Eis1	S(762)	EATETsSAVQTK	Decreased Phosphorylation in Y128 Xylose -O2/+O2
YMR031C	Eis1	T(767)	EATETSSAVQtKEPEEK	Decreased Phosphorylation in Y128 Xylose -O2/+O2
YMR031C	Eis1	Y(586)	KISGyGNDLDAQK	Decreased Phosphorylation in Y128 Xylose -O2/+O2
YMR031C	Eis1	S(775)	EPEEKIsIGNK	Decreased Phosphorylation in Y128 Xylose -O2/+O2
YMR049C	Erb1	S(20);S(23)	AAsEEsDVEEDEDK	Decreased Phosphorylation in Y128 Xylose -O2/+O2
YMR086W	Seg1	S(118)	TSsLPNQR	Decreased Phosphorylation in Y128 Xylose -O2/+O2
YMR219W	Esc1	S(911);S(918)	VRDsDLEDDEsLKK	Decreased Phosphorylation in Y128 Xylose -O2/+O2
YMR219W	Esc1	S(1591)	SVLEEQKPSMELINDKGsPENNNDEETNR	Decreased Phosphorylation in Y128 Xylose -O2/+O2
YMR230W	Rps10B	S(98)	NPsQRPQR	Decreased Phosphorylation in Y128 Xylose -O2/+O2
YMR291W	Tda1	T(504);S(507)	NSLMNGCFSTtPEsR	Decreased Phosphorylation in Y128 Xylose -O2/+O2
YMR291W	Tda1	T(541)	tASMSSNDTTAINDNDTTNDKNPAR	Decreased Phosphorylation in Y128 Xylose -O2/+O2
YNL039W	Bdp1	T(180)	LGSItENDMNLK	Decreased Phosphorylation in Y128 Xylose -O2/+O2
YNL049C	Sfb2	S(417)	sEQGILNTPK	Decreased Phosphorylation in Y128 Xylose -O2/+O2
YNL059C	Arp5	S(7);T(9)	DAsLtPLK	Decreased Phosphorylation in Y128 Xylose -O2/+O2
YNL068C	Fkh2	S(841);T(842)	DINSSPLKNQGGstANAK	Decreased Phosphorylation in Y128 Xylose -O2/+O2
YNL156C	Nsg2	S(52);T(53)	SVSIDstK	Decreased Phosphorylation in Y128 Xylose -O2/+O2
YNL167C	Sko1	T(385);S(386)	RMSSTSStsK	Decreased Phosphorylation in Y128 Xylose -O2/+O2
YNL212W	Vid27	S(207)	DTsFEHEK	Decreased Phosphorylation in Y128 Xylose -O2/+O2
YNL267W	Pik1	S(396)	TNsQPLSR	Decreased Phosphorylation in Y128 Xylose -O2/+O2
YNL293W	Msb3	S(119)	AEGEDDDDNNGDNGNEDLEEVHsDDLDLVPDDDNR	Decreased Phosphorylation in Y128 Xylose -O2/+O2
YNR013C	Pho91	S(311);S(312)	INNDENssGNEEDEDGNR	Decreased Phosphorylation in Y128 Xylose -O2/+O2
YNR019W	Are2	S(176);S(182)	KSsPDAVDsVGK	Decreased Phosphorylation in Y128 Xylose -O2/+O2
YNR019W	Are2	S(182)	KSSPDAVDsVGK	Decreased Phosphorylation in Y128 Xylose -O2/+O2
YNR034W	Sol1	S(65);S(68);S(71)	VNsVRsNAsSR	Decreased Phosphorylation in Y128 Xylose -O2/+O2
YNR039C	Zrg17	S(137)	GIsPDAGSSK	Decreased Phosphorylation in Y128 Xylose -O2/+O2
YNR047W	Fpk1	S(341)	DTLNGSPsR	Decreased Phosphorylation in Y128 Xylose -O2/+O2
YOL041C	Nop12	S(65)	EAsKPDVSDEQTEEVALPK	Decreased Phosphorylation in Y128 Xylose -O2/+O2
YOL054W	Psh1	S(191)	DEFDEEEYsEGELDEIR	Decreased Phosphorylation in Y128 Xylose -O2/+O2
YOL061W	Prs5	S(183)	KTLsFSR	Decreased Phosphorylation in Y128 Xylose -O2/+O2
YOL144W	Nop8	S(377)	LIEDsDNDIDHAK	Decreased Phosphorylation in Y128 Xylose -O2/+O2
YOL144W	Nop8	S(268)	DFDFDKPMTLNDsDEELLTEQR	Decreased Phosphorylation in Y128 Xylose -O2/+O2
YOL145C	Ctr9	S(977);Y(983)	DNSDLsDKDNEyDEEKPR	Decreased Phosphorylation in Y128 Xylose -O2/+O2
YOR014W	Rts1	T(257)	LNPDTDLELIKtPQR	Decreased Phosphorylation in Y128 Xylose -O2/+O2
YOR014W	Rts1	S(236);T(242);T(244)	SSHsFERLPtPtK	Decreased Phosphorylation in Y128 Xylose -O2/+O2
YOR098C	Nup1	S(252)	SSIsNGNLATGPNLTSEIEDLR	Decreased Phosphorylation in Y128 Xylose -O2/+O2
YOR178C	Gac1	S(60)	SKsEIFLTSPEK	Decreased Phosphorylation in Y128 Xylose -O2/+O2
YOR220W	Rcn2	S(187);S(188)	SSssTSNLSLNR	Decreased Phosphorylation in Y128 Xylose -O2/+O2
YOR220W	Rcn2	S(201);S(204)	SSQTsLPsQLENK	Decreased Phosphorylation in Y128 Xylose -O2/+O2
YOR239W	Abp140	T(70)	tAEKPLETNLPKPETNKEDEEEGSMSENK	Decreased Phosphorylation in Y128 Xylose -O2/+O2
YOR260W	Gcd1	S(300)	QAsFKDPFTGNQQQQNPPTPDDDEDR	Decreased Phosphorylation in Y128 Xylose -O2/+O2
YOR267C	Hrk1	S(598)	ANSDCNDKTDCNANNDCsNESDCNAK	Decreased Phosphorylation in Y128 Xylose -O2/+O2
YOR267C	Hrk1	S(122)	QTHsMAELK	Decreased Phosphorylation in Y128 Xylose -O2/+O2
YOR361C	Prt1	S(61)	LEDIPVDDIDFsDLEEQYK	Decreased Phosphorylation in Y128 Xylose -O2/+O2
YPL016W	Swi1	S(837)	VNNNGTLTPNDsNDEK	Decreased Phosphorylation in Y128 Xylose -O2/+O2
YPL019C	Vtc3	S(621);S(622)	HIIADLEDHEssDEEGTALPK	Decreased Phosphorylation in Y128 Xylose -O2/+O2
YPL019C	Vtc3	S(592)	IsVPDGK	Decreased Phosphorylation in Y128 Xylose -O2/+O2
YPL157W	Tgs1	S(278);S(279);S(285)	EssEKEELsSENEELSKR	Decreased Phosphorylation in Y128 Xylose -O2/+O2
YPL237W	Sui3	S(112)	AGLDNVDAEsK	Decreased Phosphorylation in Y128 Xylose -O2/+O2
YPR112C	Mrd1	S(264)	DTDIGLVNDDANsDEKENEK	Decreased Phosphorylation in Y128 Xylose -O2/+O2
YPR124W	Ctr1	S(414)	NNESKVAIsENNQK	Decreased Phosphorylation in Y128 Xylose -O2/+O2
